# Supplementary material
Source: publisher figshare collection journal article supplement (https://gsapubs.figshare.com/articles/dataset/_/16746229)
Supplement: Supplementary file 1 [file 1]

## Sheet: centerline profiles
T*=0		T*=7700		T*=15200		T*=24800		T*=31400		T*=35300		T*=39400		T*=42400		T*=44800		T*=48500		T*=51800		T*=57100		T*=61100		T*=63700		T*=66400
x(m)	elevation(mm)	x(m)	elevation(mm)	x(m)	elevation(mm)	x(m)	elevation(mm)	x(m)	elevation(mm)	x(m)	elevation(mm)	x(m)	elevation(mm)	x(m)	elevation(mm)	x(m)	elevation(mm)	x(m)	elevation(mm)	x(m)	elevation(mm)	x(m)	elevation(mm)	x(m)	elevation(mm)	x(m)	elevation(mm)	x(m)	elevation(mm)
0	-1060.5	0	-1040.2	0	-1042.3	0	-1043	0	-1041.9	0	-1043.5	0	-1043.3	0	-1048.3	0	-1050.4	0	-1051.1	0	-1047.8	0	-1047.6	0	-1050.1	0	-1057.4	0	-1060.5
0.001	-1061.4	0.05	-1037.5	0.05	-1043	0.05	-1054.2	0.002	-1043.1	0.001	-1043.6	0.001	-1043.6	0.001	-1048.1	0.001	-1050.5	0.001	-1051.7	0.001	-1048.8	0.001	-1048.1	0.001	-1051	0.001	-1058	0.001	-1061.4
0.002	-1062.3	0.1	-1038.2	0.1	-1041.3	0.1	-1053	0.004	-1044.1	0.002	-1044.6	0.002	-1043.8	0.002	-1049.3	0.002	-1051.2	0.002	-1052.5	0.002	-1049	0.002	-1048.4	0.002	-1051.6	0.002	-1059.4	0.002	-1062.3
0.003	-1061.7	0.15	-1038.8	0.15	-1044.1	0.15	-1050.5	0.006	-1044.6	0.003	-1044.8	0.003	-1044.6	0.003	-1049.3	0.003	-1052.3	0.003	-1052.5	0.003	-1049.8	0.003	-1048.3	0.003	-1051.9	0.003	-1058.5	0.003	-1061.7
0.004	-1063.1	0.2	-1038.6	0.2	-1044	0.2	-1048.6	0.008	-1045.5	0.004	-1045.5	0.004	-1045.1	0.004	-1049.6	0.004	-1052.3	0.004	-1053.2	0.004	-1050.1	0.004	-1049.3	0.004	-1052.4	0.004	-1059.4	0.004	-1063.1
0.005	-1063	0.25	-1039.3	0.25	-1044.9	0.25	-1052	0.01	-1045.9	0.005	-1045.5	0.005	-1045.3	0.005	-1050.5	0.005	-1052.6	0.005	-1053.7	0.005	-1050.6	0.005	-1049.2	0.005	-1053	0.005	-1059.8	0.005	-1063
0.006	-1064	0.3	-1039.6	0.3	-1043.6	0.3	-1053.9	0.012	-1046.8	0.006	-1046.6	0.006	-1046.1	0.006	-1050.9	0.006	-1053.2	0.006	-1053.9	0.006	-1050.7	0.006	-1049.7	0.006	-1053.7	0.006	-1060.6	0.006	-1064
0.007	-1064.3	0.35	-1041.1	0.35	-1044.1	0.35	-1053.8	0.014	-1047.2	0.007	-1046.8	0.007	-1046.5	0.007	-1051.2	0.007	-1053.3	0.007	-1054	0.007	-1051.8	0.007	-1050.8	0.007	-1054.5	0.007	-1060.7	0.007	-1064.3
0.008	-1064.8	0.4	-1041.8	0.4	-1045.8	0.4	-1052.4	0.016	-1048	0.008	-1047.3	0.008	-1046.7	0.008	-1051.3	0.008	-1054	0.008	-1054.6	0.008	-1051.7	0.008	-1051.2	0.008	-1055.2	0.008	-1061.1	0.008	-1064.8
0.009	-1065.1	0.45	-1042.1	0.45	-1045	0.45	-1052.9	0.018	-1048.4	0.009	-1047.2	0.009	-1047	0.009	-1051.2	0.009	-1054.2	0.009	-1055.1	0.009	-1052.1	0.009	-1051.3	0.009	-1055.8	0.009	-1061.4	0.009	-1065.1
0.01	-1065.9	0.5	-1041.9	0.5	-1045.2	0.5	-1053.8	0.02	-1048.9	0.01	-1048.5	0.01	-1047.9	0.01	-1052.7	0.01	-1054.5	0.01	-1055.2	0.01	-1052.8	0.01	-1051.7	0.01	-1055.8	0.01	-1061.8	0.01	-1065.9
0.011	-1065.6	0.55	-1043	0.55	-1046	0.55	-1054.8	0.022	-1049.5	0.011	-1048.4	0.011	-1048.4	0.011	-1052.9	0.011	-1055.3	0.011	-1055.5	0.011	-1053.2	0.011	-1052.1	0.011	-1056.7	0.011	-1061.6	0.011	-1065.6
0.012	-1066.6	0.6	-1042.5	0.6	-1045.8	0.6	-1055.5	0.024	-1050.3	0.012	-1048.8	0.012	-1048.9	0.012	-1053.3	0.012	-1055.3	0.012	-1056.2	0.012	-1053.7	0.012	-1052.9	0.012	-1057	0.012	-1062.2	0.012	-1066.6
0.013	-1066.9	0.65	-1043.8	0.65	-1047.4	0.65	-1054.4	0.026	-1050.7	0.013	-1048.9	0.013	-1048.7	0.013	-1053.6	0.013	-1055.7	0.013	-1056.2	0.013	-1055.3	0.013	-1054.1	0.013	-1057.9	0.013	-1063.1	0.013	-1066.9
0.014	-1067.2	0.7	-1043.4	0.7	-1046.5	0.7	-1053.5	0.028	-1051.3	0.014	-1049.7	0.014	-1048.9	0.014	-1054.4	0.014	-1056.2	0.014	-1056.5	0.014	-1054.9	0.014	-1054	0.014	-1058.2	0.014	-1063.4	0.014	-1067.2
0.015	-1067.1	0.75	-1044.1	0.75	-1047.1	0.75	-1054.1	0.03	-1051.9	0.015	-1049.4	0.015	-1049.6	0.015	-1054.4	0.015	-1056.2	0.015	-1057.1	0.015	-1055.6	0.015	-1054.6	0.015	-1058.3	0.015	-1064.1	0.015	-1067.1
0.016	-1068.2	0.8	-1043.2	0.8	-1045.9	0.8	-1053.3	0.032	-1052.7	0.016	-1050.3	0.016	-1050.3	0.016	-1055.2	0.016	-1057.4	0.016	-1058.3	0.016	-1055.9	0.016	-1055	0.016	-1059.1	0.016	-1064.3	0.016	-1068.2
0.017	-1068.3	0.85	-1044.9	0.85	-1047.6	0.85	-1054.6	0.034	-1052.7	0.017	-1050.4	0.017	-1050.2	0.017	-1055.3	0.017	-1057	0.017	-1058.1	0.017	-1056	0.017	-1055.3	0.017	-1059	0.017	-1065.1	0.017	-1068.3
0.018	-1069	0.9	-1043.8	0.9	-1047.4	0.9	-1053.2	0.036	-1053.1	0.018	-1050.6	0.018	-1051.4	0.018	-1056.2	0.018	-1057.9	0.018	-1058.7	0.018	-1056.4	0.018	-1055.9	0.018	-1059.7	0.018	-1065.6	0.018	-1069
0.019	-1069.4	0.95	-1044.9	0.95	-1048	0.95	-1052.8	0.038	-1053.7	0.019	-1051	0.019	-1051	0.019	-1055.4	0.019	-1057.8	0.019	-1058	0.019	-1056.9	0.019	-1056.1	0.019	-1060.1	0.019	-1065.6	0.019	-1069.4
0.02	-1070.1	1	-1044.2	1	-1048	1	-1053.3	0.04	-1054.1	0.02	-1051.2	0.02	-1051.4	0.02	-1056.6	0.02	-1058.4	0.02	-1059.2	0.02	-1057.7	0.02	-1056.8	0.02	-1060.9	0.02	-1066.6	0.02	-1070.1
0.021	-1070.1	1.05	-1043.7	1.05	-1049.3	1.05	-1054.5	0.042	-1054.7	0.021	-1051.5	0.021	-1052.2	0.021	-1056.7	0.021	-1058.5	0.021	-1059.5	0.021	-1057.5	0.021	-1057.2	0.021	-1060.6	0.021	-1066.9	0.021	-1070.1
0.022	-1070.9	1.1	-1044.4	1.1	-1046.8	1.1	-1054.9	0.044	-1055.4	0.022	-1052.2	0.022	-1052.7	0.022	-1057.1	0.022	-1059	0.022	-1060	0.022	-1059	0.022	-1057.9	0.022	-1061.4	0.022	-1067.8	0.022	-1070.9
0.023	-1071.1	1.15	-1045.1	1.15	-1048.9	1.15	-1054.6	0.046	-1056.2	0.023	-1052.7	0.023	-1052.9	0.023	-1057.1	0.023	-1059.6	0.023	-1060.2	0.023	-1059.2	0.023	-1057.5	0.023	-1061.4	0.023	-1067.4	0.023	-1071.1
0.024	-1071.5	1.2	-1044.7	1.2	-1048.8	1.2	-1055.2	0.048	-1056.7	0.024	-1053.6	0.024	-1053.4	0.024	-1057.8	0.024	-1059.8	0.024	-1061	0.024	-1059.5	0.024	-1058.3	0.024	-1062	0.024	-1068.5	0.024	-1071.5
0.025	-1071.7	1.25	-1044	1.25	-1046.8	1.25	-1055.2	0.05	-1057	0.025	-1053	0.025	-1052.9	0.025	-1058.2	0.025	-1059.9	0.025	-1061.1	0.025	-1059.7	0.025	-1059	0.025	-1062.2	0.025	-1068.5	0.025	-1071.7
0.026	-1072.7	1.3	-1045.8	1.3	-1048.4	1.3	-1054	0.052	-1056.9	0.026	-1053.5	0.026	-1054.3	0.026	-1058.7	0.026	-1061.4	0.026	-1061.3	0.026	-1058.9	0.026	-1059.2	0.026	-1062.5	0.026	-1068.9	0.026	-1072.7
0.027	-1073	1.35	-1044.8	1.35	-1048.3	1.35	-1054.4	0.054	-1058.1	0.027	-1053.9	0.027	-1054.3	0.027	-1058.6	0.027	-1060.7	0.027	-1061.9	0.027	-1060.3	0.027	-1059.7	0.027	-1062.6	0.027	-1068.3	0.027	-1073
0.028	-1073.3	1.4	-1044.7	1.4	-1050.5	1.4	-1054.4	0.056	-1058.7	0.028	-1054	0.028	-1054.2	0.028	-1059.7	0.028	-1061.9	0.028	-1062.2	0.028	-1060.6	0.028	-1060.4	0.028	-1063.4	0.028	-1069.4	0.028	-1073.3
0.029	-1073.3	1.45	-1044.5	1.45	-1048.2	1.45	-1055.8	0.058	-1059	0.029	-1054.2	0.029	-1055	0.029	-1060	0.029	-1062.1	0.029	-1062.8	0.029	-1061	0.029	-1060.1	0.029	-1063.1	0.029	-1069.4	0.029	-1073.3
0.03	-1074	1.5	-1044	1.5	-1048.8	1.5	-1053.6	0.06	-1059.4	0.03	-1054.6	0.03	-1055.8	0.03	-1060.5	0.03	-1062.7	0.03	-1063.6	0.03	-1061.2	0.03	-1061	0.03	-1064.3	0.03	-1069.9	0.03	-1074
0.031	-1074.1	1.55	-1043.9	1.55	-1048.7	1.55	-1054.1	0.062	-1059.7	0.031	-1055.2	0.031	-1055.8	0.031	-1060.9	0.031	-1062.8	0.031	-1063.7	0.031	-1062.1	0.031	-1060.5	0.031	-1064.9	0.031	-1070.2	0.031	-1074.1
0.032	-1075.2	1.6	-1046	1.6	-1050.3	1.6	-1055.6	0.064	-1059.8	0.032	-1055.9	0.032	-1056.1	0.032	-1061.6	0.032	-1064.1	0.032	-1064.1	0.032	-1062.8	0.032	-1061.8	0.032	-1064.9	0.032	-1071.3	0.032	-1075.2
0.033	-1075.1	1.65	-1046.1	1.65	-1050.9	1.65	-1055.2	0.066	-1060.6	0.033	-1055.6	0.033	-1056.5	0.033	-1061.9	0.033	-1064.2	0.033	-1064.3	0.033	-1063.2	0.033	-1061.9	0.033	-1065.4	0.033	-1070.8	0.033	-1075.1
0.034	-1075.5	1.7	-1045.6	1.7	-1050.6	1.7	-1056.1	0.068	-1060.9	0.034	-1056.1	0.034	-1056.7	0.034	-1062.2	0.034	-1064.9	0.034	-1064.4	0.034	-1063.3	0.034	-1062.2	0.034	-1066.4	0.034	-1071.3	0.034	-1075.5
0.035	-1076	1.75	-1046.3	1.75	-1049.5	1.75	-1055.7	0.07	-1061.1	0.035	-1056.3	0.035	-1057.7	0.035	-1061.7	0.035	-1064.9	0.035	-1065.1	0.035	-1064.1	0.035	-1062.4	0.035	-1067.2	0.035	-1072.3	0.035	-1076
0.036	-1076.9	1.8	-1045.9	1.8	-1049.1	1.8	-1055.5	0.072	-1061.8	0.036	-1056.6	0.036	-1058	0.036	-1062.4	0.036	-1065.7	0.036	-1065.2	0.036	-1064.2	0.036	-1063.5	0.036	-1067.1	0.036	-1073	0.036	-1076.9
0.037	-1077.5	1.85	-1047.2	1.85	-1050	1.85	-1056.2	0.074	-1061.7	0.037	-1057.4	0.037	-1058.2	0.037	-1062.8	0.037	-1065	0.037	-1066.1	0.037	-1064.9	0.037	-1064.5	0.037	-1067.8	0.037	-1073.1	0.037	-1077.5
0.038	-1078	1.9	-1045.3	1.9	-1051.2	1.9	-1057.2	0.076	-1063.1	0.038	-1057.7	0.038	-1058.8	0.038	-1063.7	0.038	-1066	0.038	-1066.7	0.038	-1065.4	0.038	-1064.9	0.038	-1068.3	0.038	-1073.8	0.038	-1078
0.039	-1077.7	1.95	-1046.2	1.95	-1049.9	1.95	-1059	0.078	-1063.5	0.039	-1057.4	0.039	-1059	0.039	-1064	0.039	-1066.4	0.039	-1066.5	0.039	-1065.9	0.039	-1064.7	0.039	-1068.2	0.039	-1074.6	0.039	-1077.7
0.04	-1078.2	2	-1046.2	2	-1049.4	2	-1057.3	0.08	-1064.3	0.04	-1058	0.04	-1059.5	0.04	-1064.9	0.04	-1067.1	0.04	-1067.4	0.04	-1065.9	0.04	-1065.8	0.04	-1068.4	0.04	-1074.5	0.04	-1078.2
0.041	-1078.6	2.05	-1046.5	2.05	-1050.9	2.05	-1056.3	0.082	-1064.2	0.041	-1058.6	0.041	-1059.5	0.041	-1064.5	0.041	-1067.1	0.041	-1067.6	0.041	-1066.4	0.041	-1066.1	0.041	-1068.8	0.041	-1075.6	0.041	-1078.6
0.042	-1079.1	2.1	-1045.7	2.1	-1049.4	2.1	-1056.1	0.084	-1063.8	0.042	-1058.2	0.042	-1060.3	0.042	-1065	0.042	-1068.1	0.042	-1068.5	0.042	-1066.3	0.042	-1066.6	0.042	-1069.5	0.042	-1076.7	0.042	-1079.1
0.043	-1079.3	2.15	-1045.9	2.15	-1050.1	2.15	-1055.5	0.086	-1064.1	0.043	-1058.4	0.043	-1059.9	0.043	-1065	0.043	-1068.5	0.043	-1069.1	0.043	-1067	0.043	-1067.2	0.043	-1070.3	0.043	-1076.7	0.043	-1079.3
0.044	-1079.7	2.2	-1045.7	2.2	-1047.9	2.2	-1055.2	0.088	-1063.3	0.044	-1058.7	0.044	-1060.9	0.044	-1065.9	0.044	-1068.8	0.044	-1069.4	0.044	-1067.3	0.044	-1067.5	0.044	-1070.8	0.044	-1077.2	0.044	-1079.7
0.045	-1080.6	2.25	-1043.6					0.09	-1063.3	0.045	-1058.7	0.045	-1060.8	0.045	-1066.5	0.045	-1069.1	0.045	-1069.7	0.045	-1067.9	0.045	-1067.5	0.045	-1070.6	0.045	-1077.2	0.045	-1080.6
0.046	-1081.2	2.3	-1043.4					0.092	-1063.4	0.046	-1059.2	0.046	-1061.2	0.046	-1066	0.046	-1069.5	0.046	-1069.9	0.046	-1068.4	0.046	-1067.7	0.046	-1070.7	0.046	-1077.6	0.046	-1081.2
0.047	-1081.1	2.35	-1042.4					0.094	-1063.5	0.047	-1058.7	0.047	-1061.3	0.047	-1065.3	0.047	-1069.6	0.047	-1070.1	0.047	-1068.7	0.047	-1068.2	0.047	-1070.7	0.047	-1077.8	0.047	-1081.1
0.048	-1081.3	2.4	-1041.4					0.096	-1064	0.048	-1059.5	0.048	-1062.2	0.048	-1066.2	0.048	-1069.8	0.048	-1070.7	0.048	-1069	0.048	-1068.8	0.048	-1072.1	0.048	-1077.8	0.048	-1081.3
0.049	-1081.5	2.45	-1044.7					0.098	-1064.4	0.049	-1059.3	0.049	-1062.2	0.049	-1066.3	0.049	-1069.7	0.049	-1071	0.049	-1069.3	0.049	-1069.7	0.049	-1072.2	0.049	-1078.2	0.049	-1081.5
0.05	-1082.2	2.5	-1043.6					0.1	-1064.2	0.05	-1059.6	0.05	-1063.2	0.05	-1067	0.05	-1070.4	0.05	-1071.5	0.05	-1070	0.05	-1069.5	0.05	-1073	0.05	-1078.9	0.05	-1082.2
0.051	-1082.4	2.55	-1044.1					0.102	-1064.1	0.051	-1059	0.051	-1062.5	0.051	-1067.1	0.051	-1070.5	0.051	-1071.3	0.051	-1070.9	0.051	-1070.1	0.051	-1073.5	0.051	-1078.8	0.051	-1082.4
0.052	-1083.5							0.104	-1063.9	0.052	-1059.8	0.052	-1062.9	0.052	-1067.5	0.052	-1070.9	0.052	-1071.8	0.052	-1071.2	0.052	-1070.9	0.052	-1074.3	0.052	-1079.4	0.052	-1083.5
0.053	-1083.4							0.106	-1064.2	0.053	-1060	0.053	-1062.9	0.053	-1068	0.053	-1071	0.053	-1072.3	0.053	-1071.4	0.053	-1070.8	0.053	-1075	0.053	-1080	0.053	-1083.4
0.054	-1084.8							0.108	-1063.4	0.054	-1061	0.054	-1063.5	0.054	-1068.8	0.054	-1071.8	0.054	-1073.3	0.054	-1071.8	0.054	-1071.5	0.054	-1075.7	0.054	-1080.8	0.054	-1084.8
0.055	-1083.6							0.11	-1063.7	0.055	-1060.5	0.055	-1063.4	0.055	-1068.6	0.055	-1071.7	0.055	-1074.4	0.055	-1072.4	0.055	-1071.3	0.055	-1075.7	0.055	-1081	0.055	-1083.6
0.056	-1083.8							0.112	-1063.3	0.056	-1061.4	0.056	-1064.1	0.056	-1069.7	0.056	-1072.3	0.056	-1074.5	0.056	-1072	0.056	-1072.2	0.056	-1076.6	0.056	-1081.5	0.056	-1083.8
0.057	-1084.2							0.114	-1063.8	0.057	-1061.4	0.057	-1064	0.057	-1069.5	0.057	-1071.9	0.057	-1074.5	0.057	-1072.3	0.057	-1072.4	0.057	-1077	0.057	-1081.2	0.057	-1084.2
0.058	-1084.7							0.116	-1063.5	0.058	-1061.7	0.058	-1064	0.058	-1070	0.058	-1073.7	0.058	-1074.7	0.058	-1072.4	0.058	-1073	0.058	-1077.4	0.058	-1081.7	0.058	-1084.7
0.059	-1085							0.118	-1063.9	0.059	-1061.6	0.059	-1063.9	0.059	-1069.4	0.059	-1074.1	0.059	-1074.8	0.059	-1073.1	0.059	-1073	0.059	-1077.5	0.059	-1081.5	0.059	-1085
0.06	-1086							0.12	-1063.6	0.06	-1062.7	0.06	-1064.2	0.06	-1070.2	0.06	-1072.6	0.06	-1075.5	0.06	-1073.3	0.06	-1073.9	0.06	-1077.9	0.06	-1082.8	0.06	-1086
0.061	-1086.1							0.122	-1063.8	0.061	-1063	0.061	-1064.4	0.061	-1069.6	0.061	-1073.3	0.061	-1075.5	0.061	-1073.6	0.061	-1074.2	0.061	-1077.7	0.061	-1082.8	0.061	-1086.1
0.062	-1086.7							0.124	-1064	0.062	-1063.3	0.062	-1065.1	0.062	-1070.7	0.062	-1073.8	0.062	-1075.4	0.062	-1073.6	0.062	-1074.5	0.062	-1078.1	0.062	-1083.5	0.062	-1086.7
0.063	-1086.8							0.126	-1064.4	0.063	-1063.3	0.063	-1064.9	0.063	-1070.3	0.063	-1074	0.063	-1074.9	0.063	-1075.4	0.063	-1074.9	0.063	-1078.2	0.063	-1083.9	0.063	-1086.8
0.064	-1087							0.128	-1064.3	0.064	-1063.6	0.064	-1065.7	0.064	-1070.6	0.064	-1074.1	0.064	-1075.1	0.064	-1075.2	0.064	-1075.4	0.064	-1079.2	0.064	-1084.8	0.064	-1087
0.065	-1087.9							0.13	-1064	0.065	-1063.6	0.065	-1065.4	0.065	-1070.9	0.065	-1074.2	0.065	-1075.9	0.065	-1075.6	0.065	-1075.6	0.065	-1079	0.065	-1084.5	0.065	-1087.9
0.066	-1088							0.132	-1064.1	0.066	-1064.1	0.066	-1066.2	0.066	-1071.8	0.066	-1075.2	0.066	-1075.8	0.066	-1075.9	0.066	-1075.7	0.066	-1078.9	0.066	-1084.8	0.066	-1088
0.067	-1088.1							0.134	-1063.9	0.067	-1064.5	0.067	-1065.9	0.067	-1072.1	0.067	-1075.5	0.067	-1075.8	0.067	-1076.8	0.067	-1076.2	0.067	-1079.6	0.067	-1085.3	0.067	-1088.1
0.068	-1088.3							0.136	-1063.1	0.068	-1065.1	0.068	-1066.4	0.068	-1072.8	0.068	-1075.8	0.068	-1075.9	0.068	-1077.1	0.068	-1076.9	0.068	-1080.7	0.068	-1085.5	0.068	-1088.3
0.069	-1088.3							0.138	-1062.6	0.069	-1065.1	0.069	-1066.1	0.069	-1072.8	0.069	-1075.7	0.069	-1076	0.069	-1076.9	0.069	-1077.2	0.069	-1080	0.069	-1085.1	0.069	-1088.3
0.07	-1089.6							0.14	-1062.1	0.07	-1065.2	0.07	-1066.8	0.07	-1073.5	0.07	-1076.6	0.07	-1076.9	0.07	-1076.1	0.07	-1077.7	0.07	-1080.7	0.07	-1085.8	0.07	-1089.6
0.071	-1089.9							0.142	-1062	0.071	-1065.3	0.071	-1067.3	0.071	-1073.6	0.071	-1076.2	0.071	-1077	0.071	-1076.6	0.071	-1077.7	0.071	-1080.7	0.071	-1085.9	0.071	-1089.9
0.072	-1090.9							0.144	-1061.2	0.072	-1066	0.072	-1067.8	0.072	-1073.4	0.072	-1077.3	0.072	-1076.4	0.072	-1076.9	0.072	-1078.9	0.072	-1081.1	0.072	-1086.7	0.072	-1090.9
0.073	-1091.4							0.146	-1059.9	0.073	-1065.3	0.073	-1067.7	0.073	-1073.7	0.073	-1077.7	0.073	-1077.7	0.073	-1077.9	0.073	-1079	0.073	-1081.7	0.073	-1087.3	0.073	-1091.4
0.074	-1092.3							0.148	-1059.9	0.074	-1065.9	0.074	-1068.8	0.074	-1074.2	0.074	-1077.8	0.074	-1078.3	0.074	-1077.6	0.074	-1079.6	0.074	-1081.5	0.074	-1087.5	0.074	-1092.3
0.075	-1092.2							0.15	-1059.1	0.075	-1066.1	0.075	-1068.8	0.075	-1074.3	0.075	-1077.6	0.075	-1078.3	0.075	-1078.4	0.075	-1079.1	0.075	-1082.3	0.075	-1087	0.075	-1092.2
0.076	-1092.9							0.152	-1058.5	0.076	-1066.5	0.076	-1069.2	0.076	-1074.9	0.076	-1078.2	0.076	-1078.9	0.076	-1078.3	0.076	-1079.5	0.076	-1082.6	0.076	-1088.5	0.076	-1092.9
0.077	-1092.9							0.154	-1057.6	0.077	-1066	0.077	-1069.6	0.077	-1075.1	0.077	-1078.6	0.077	-1079.2	0.077	-1078.5	0.077	-1080	0.077	-1082.6	0.077	-1087.7	0.077	-1092.9
0.078	-1093.7							0.156	-1057.7	0.078	-1067.4	0.078	-1069.6	0.078	-1075.4	0.078	-1078.8	0.078	-1079.4	0.078	-1078.7	0.078	-1080	0.078	-1083	0.078	-1088.5	0.078	-1093.7
0.079	-1094							0.158	-1057.6	0.079	-1067.4	0.079	-1069.5	0.079	-1075.2	0.079	-1078.3	0.079	-1079.6	0.079	-1079.2	0.079	-1080.2	0.079	-1082.7	0.079	-1088.1	0.079	-1094
0.08	-1094.7							0.16	-1057.4	0.08	-1067.6	0.08	-1070.1	0.08	-1075.9	0.08	-1079.1	0.08	-1080.3	0.08	-1079.6	0.08	-1081.4	0.08	-1082.7	0.08	-1089.2	0.08	-1094.7
0.081	-1094.7							0.162	-1058.2	0.081	-1068.1	0.081	-1070.3	0.081	-1076.1	0.081	-1078.9	0.081	-1080.3	0.081	-1080.1	0.081	-1080.8	0.081	-1083.1	0.081	-1089	0.081	-1094.7
0.082	-1095.2							0.164	-1056.7	0.082	-1068.9	0.082	-1070.5	0.082	-1076.3	0.082	-1079.8	0.082	-1080.4	0.082	-1079.3	0.082	-1081.3	0.082	-1083.7	0.082	-1090.4	0.082	-1095.2
0.083	-1095.6							0.166	-1056.2	0.083	-1068.6	0.083	-1071	0.083	-1076.3	0.083	-1080	0.083	-1080.6	0.083	-1080.5	0.083	-1081.3	0.083	-1084.1	0.083	-1090.8	0.083	-1095.6
0.084	-1096.7							0.168	-1055.7	0.084	-1068.8	0.084	-1071.7	0.084	-1077.3	0.084	-1079.9	0.084	-1081.4	0.084	-1080.2	0.084	-1081.4	0.084	-1084.8	0.084	-1091.9	0.084	-1096.7
0.085	-1096.4							0.17	-1055.7	0.085	-1068.5	0.085	-1071.6	0.085	-1076.9	0.085	-1080.2	0.085	-1081.6	0.085	-1080.9	0.085	-1081.9	0.085	-1085.6	0.085	-1091.5	0.085	-1096.4
0.086	-1097							0.172	-1055.8	0.086	-1069	0.086	-1071.8	0.086	-1077.6	0.086	-1080.8	0.086	-1082	0.086	-1080.8	0.086	-1082.3	0.086	-1086.2	0.086	-1092.6	0.086	-1097
0.087	-1097.8							0.174	-1055	0.087	-1069.3	0.087	-1072.2	0.087	-1077.4	0.087	-1080.4	0.087	-1081.7	0.087	-1081.4	0.087	-1081.4	0.087	-1085.8	0.087	-1092.7	0.087	-1097.8
0.088	-1099.2							0.176	-1054.3	0.088	-1069.9	0.088	-1072.7	0.088	-1077.6	0.088	-1081.4	0.088	-1082.2	0.088	-1081	0.088	-1082.2	0.088	-1086.4	0.088	-1094.1	0.088	-1099.2
0.089	-1099							0.178	-1053.8	0.089	-1070.1	0.089	-1072.4	0.089	-1077.7	0.089	-1081.6	0.089	-1082.5	0.089	-1081.8	0.089	-1083	0.089	-1086.2	0.089	-1094	0.089	-1099
0.09	-1098.9							0.18	-1054.1	0.09	-1070.3	0.09	-1072.6	0.09	-1078.6	0.09	-1081.7	0.09	-1082.9	0.09	-1082	0.09	-1083.9	0.09	-1087.2	0.09	-1094.7	0.09	-1098.9
0.091	-1099.3							0.182	-1055.4	0.091	-1071.1	0.091	-1073.1	0.091	-1078.7	0.091	-1081.7	0.091	-1082.9	0.091	-1082.5	0.091	-1084.1	0.091	-1086.9	0.091	-1094.7	0.091	-1099.3
0.092	-1099.9							0.184	-1053.8	0.092	-1071.4	0.092	-1073.4	0.092	-1079.4	0.092	-1082.2	0.092	-1083	0.092	-1082.6	0.092	-1084.2	0.092	-1088.2	0.092	-1095.4	0.092	-1099.9
0.093	-1099.7							0.186	-1054.2	0.093	-1072.3	0.093	-1073.2	0.093	-1079.6	0.093	-1081.5	0.093	-1083.5	0.093	-1083.4	0.093	-1085.2	0.093	-1088.3	0.093	-1095.5	0.093	-1099.7
0.094	-1101							0.188	-1054.1	0.094	-1071.2	0.094	-1073.9	0.094	-1080.7	0.094	-1082.5	0.094	-1083.7	0.094	-1083.7	0.094	-1085.9	0.094	-1089.5	0.094	-1096.3	0.094	-1101
0.095	-1100.6							0.19	-1053.7	0.095	-1071.6	0.095	-1073.6	0.095	-1080.7	0.095	-1083.1	0.095	-1084	0.095	-1084.8	0.095	-1085.5	0.095	-1089.7	0.095	-1096.2	0.095	-1100.6
0.096	-1101.3							0.192	-1053.8	0.096	-1071.9	0.096	-1073.7	0.096	-1081.5	0.096	-1084.1	0.096	-1084.5	0.096	-1085.1	0.096	-1086.6	0.096	-1090.5	0.096	-1096.8	0.096	-1101.3
0.097	-1101.2							0.194	-1053.1	0.097	-1072.1	0.097	-1073.8	0.097	-1081.6	0.097	-1083.8	0.097	-1085.2	0.097	-1085.2	0.097	-1086.7	0.097	-1090.6	0.097	-1096.8	0.097	-1101.2
0.098	-1102.5							0.196	-1053.1	0.098	-1072.1	0.098	-1074.4	0.098	-1082.4	0.098	-1084.6	0.098	-1085.5	0.098	-1085.9	0.098	-1087.4	0.098	-1091.2	0.098	-1097.8	0.098	-1102.5
0.099	-1102.1							0.198	-1052	0.099	-1072.4	0.099	-1074.1	0.099	-1082.6	0.099	-1084	0.099	-1085.8	0.099	-1086.2	0.099	-1087.5	0.099	-1091.3	0.099	-1097.3	0.099	-1102.1
0.1	-1103.7							0.2	-1052.2	0.1	-1072.6	0.1	-1074.7	0.1	-1083.6	0.1	-1084.6	0.1	-1086.4	0.1	-1086.2	0.1	-1088.3	0.1	-1092.5	0.1	-1098.7	0.1	-1103.7
0.101	-1103.1							0.202	-1051.7	0.101	-1072.8	0.101	-1074.8	0.101	-1083.7	0.101	-1084.3	0.101	-1087	0.101	-1087.1	0.101	-1088.4	0.101	-1092.3	0.101	-1098.9	0.101	-1103.1
0.102	-1103.7							0.204	-1051.7	0.102	-1073.2	0.102	-1075.3	0.102	-1084	0.102	-1085.2	0.102	-1086.8	0.102	-1087.7	0.102	-1089.2	0.102	-1093.4	0.102	-1099.7	0.102	-1103.7
0.103	-1104.5							0.206	-1052.4	0.103	-1073.5	0.103	-1075.9	0.103	-1084.6	0.103	-1085	0.103	-1088.1	0.103	-1088.1	0.103	-1089.6	0.103	-1093.1	0.103	-1099.8	0.103	-1104.5
0.104	-1105.5							0.208	-1052.1	0.104	-1073.6	0.104	-1076.1	0.104	-1084.7	0.104	-1084.8	0.104	-1087.8	0.104	-1088	0.104	-1091	0.104	-1093.7	0.104	-1099.8	0.104	-1105.5
0.105	-1105.2							0.21	-1052.4	0.105	-1073.8	0.105	-1076.4	0.105	-1085.1	0.105	-1085.1	0.105	-1087.9	0.105	-1088.2	0.105	-1090.2	0.105	-1093.5	0.105	-1100.6	0.105	-1105.2
0.106	-1106							0.212	-1051.6	0.106	-1073.9	0.106	-1076.8	0.106	-1084.9	0.106	-1085.9	0.106	-1088.3	0.106	-1087.7	0.106	-1091	0.106	-1094.4	0.106	-1101	0.106	-1106
0.107	-1105.9							0.214	-1052.4	0.107	-1074.5	0.107	-1077	0.107	-1084.8	0.107	-1085.9	0.107	-1088.1	0.107	-1088.6	0.107	-1091.6	0.107	-1094.6	0.107	-1101.1	0.107	-1105.9
0.108	-1106.1							0.216	-1051.5	0.108	-1074.7	0.108	-1077.9	0.108	-1085	0.108	-1086.6	0.108	-1089.1	0.108	-1088.6	0.108	-1092.3	0.108	-1094.8	0.108	-1101.6	0.108	-1106.1
0.109	-1106.5							0.218	-1051.7	0.109	-1075.1	0.109	-1078.5	0.109	-1084.7	0.109	-1086.1	0.109	-1089.1	0.109	-1089.5	0.109	-1092.6	0.109	-1095.5	0.109	-1102.2	0.109	-1106.5
0.11	-1107.2							0.22	-1051.6	0.11	-1074.9	0.11	-1078.7	0.11	-1085.6	0.11	-1087.8	0.11	-1089.8	0.11	-1089.5	0.11	-1092.9	0.11	-1095.7	0.11	-1102.9	0.11	-1107.2
0.111	-1107.8							0.222	-1051.7	0.111	-1074.5	0.111	-1078.8	0.111	-1085.7	0.111	-1087.9	0.111	-1089.4	0.111	-1089.6	0.111	-1093	0.111	-1095.8	0.111	-1102.9	0.111	-1107.8
0.112	-1108.3							0.224	-1052.2	0.112	-1074.9	0.112	-1078.8	0.112	-1086.3	0.112	-1088.4	0.112	-1090.7	0.112	-1090	0.112	-1093.6	0.112	-1097.3	0.112	-1104	0.112	-1108.3
0.113	-1108.1							0.226	-1052.1	0.113	-1075.1	0.113	-1078.1	0.113	-1086	0.113	-1088	0.113	-1090.3	0.113	-1090.6	0.113	-1094	0.113	-1096.8	0.113	-1103.8	0.113	-1108.1
0.114	-1109.1							0.228	-1052.4	0.114	-1075.5	0.114	-1078.6	0.114	-1086.4	0.114	-1087.8	0.114	-1091.3	0.114	-1090	0.114	-1094	0.114	-1097.2	0.114	-1105.4	0.114	-1109.1
0.115	-1109.6							0.23	-1051.8	0.115	-1075.1	0.115	-1078.4	0.115	-1086.4	0.115	-1088.4	0.115	-1091.6	0.115	-1090.6	0.115	-1094.1	0.115	-1097.2	0.115	-1105.5	0.115	-1109.6
0.116	-1109.9							0.232	-1052.1	0.116	-1075.4	0.116	-1078.6	0.116	-1087	0.116	-1088.7	0.116	-1091.4	0.116	-1091.2	0.116	-1094.9	0.116	-1097.6	0.116	-1106	0.116	-1109.9
0.117	-1109.8							0.234	-1052.8	0.117	-1075.4	0.117	-1079.3	0.117	-1086.6	0.117	-1088.9	0.117	-1092	0.117	-1091.5	0.117	-1095.4	0.117	-1097.5	0.117	-1106.2	0.117	-1109.8
0.118	-1110.5							0.236	-1052.8	0.118	-1076.1	0.118	-1080.2	0.118	-1087.5	0.118	-1089.1	0.118	-1092.5	0.118	-1091.3	0.118	-1095.2	0.118	-1099	0.118	-1106.5	0.118	-1110.5
0.119	-1110.2							0.238	-1052.3	0.119	-1075.7	0.119	-1079.3	0.119	-1086.9	0.119	-1090.1	0.119	-1092.8	0.119	-1091.9	0.119	-1096.3	0.119	-1098.9	0.119	-1106.2	0.119	-1110.2
0.12	-1111.3							0.24	-1052.1	0.12	-1076.3	0.12	-1079.2	0.12	-1088.3	0.12	-1089.4	0.12	-1092.9	0.12	-1092.1	0.12	-1096.2	0.12	-1100.6	0.12	-1107.5	0.12	-1111.3
0.121	-1111.1							0.242	-1053.4	0.121	-1076.1	0.121	-1079.4	0.121	-1088.3	0.121	-1088.8	0.121	-1093.3	0.121	-1092.1	0.121	-1096.4	0.121	-1100.4	0.121	-1107.1	0.121	-1111.1
0.122	-1111							0.244	-1053.5	0.122	-1075.9	0.122	-1080.1	0.122	-1088.6	0.122	-1090.4	0.122	-1094.1	0.122	-1093	0.122	-1096.9	0.122	-1100.5	0.122	-1107.8	0.122	-1111
0.123	-1111.7							0.246	-1053.8	0.123	-1076	0.123	-1080.5	0.123	-1088.2	0.123	-1090	0.123	-1093.5	0.123	-1093.1	0.123	-1097.3	0.123	-1100.9	0.123	-1107.9	0.123	-1111.7
0.124	-1112.5							0.248	-1054.6	0.124	-1076.2	0.124	-1081.2	0.124	-1088.5	0.124	-1090.5	0.124	-1093.9	0.124	-1093.9	0.124	-1098.2	0.124	-1099.7	0.124	-1108	0.124	-1112.5
0.125	-1112.3							0.25	-1054.8	0.125	-1075.9	0.125	-1080.7	0.125	-1088.3	0.125	-1090.5	0.125	-1094.2	0.125	-1094.1	0.125	-1098.2	0.125	-1101.6	0.125	-1108.4	0.125	-1112.3
0.126	-1112.8							0.252	-1054.4	0.126	-1076.3	0.126	-1080.5	0.126	-1088.8	0.126	-1090.7	0.126	-1095.1	0.126	-1093.6	0.126	-1099	0.126	-1101.6	0.126	-1109.9	0.126	-1112.8
0.127	-1113.3							0.254	-1053.9	0.127	-1075.6	0.127	-1080.5	0.127	-1088.9	0.127	-1090.2	0.127	-1094.8	0.127	-1093.9	0.127	-1098.6	0.127	-1102.2	0.127	-1109.3	0.127	-1113.3
0.128	-1114.3							0.256	-1054.2	0.128	-1076.3	0.128	-1080.2	0.128	-1089.1	0.128	-1091.2	0.128	-1094.7	0.128	-1094.7	0.128	-1099.4	0.128	-1102.9	0.128	-1110.2	0.128	-1114.3
0.129	-1114.3							0.258	-1054.6	0.129	-1074.6	0.129	-1080.1	0.129	-1089.1	0.129	-1090.9	0.129	-1094.9	0.129	-1095.1	0.129	-1099.5	0.129	-1102.8	0.129	-1109.6	0.129	-1114.3
0.13	-1115.2							0.26	-1054.1	0.13	-1074.8	0.13	-1081.1	0.13	-1089.2	0.13	-1091.7	0.13	-1095.6	0.13	-1095.2	0.13	-1100	0.13	-1103.4	0.13	-1110.6	0.13	-1115.2
0.131	-1115.3							0.262	-1054.1	0.131	-1074.6	0.131	-1080.7	0.131	-1089.1	0.131	-1091.2	0.131	-1096.3	0.131	-1095.2	0.131	-1099.8	0.131	-1103.5	0.131	-1110.5	0.131	-1115.3
0.132	-1115.9							0.264	-1053.9	0.132	-1075	0.132	-1081.1	0.132	-1089	0.132	-1091.2	0.132	-1096.3	0.132	-1096	0.132	-1100.2	0.132	-1104.1	0.132	-1111.6	0.132	-1115.9
0.133	-1116.1							0.266	-1053.6	0.133	-1075.2	0.133	-1080.9	0.133	-1089.5	0.133	-1092.2	0.133	-1096.3	0.133	-1096.1	0.133	-1100.2	0.133	-1104.2	0.133	-1111.4	0.133	-1116.1
0.134	-1117							0.268	-1054.5	0.134	-1075.3	0.134	-1081.7	0.134	-1089.2	0.134	-1092.3	0.134	-1096.5	0.134	-1095.8	0.134	-1101.1	0.134	-1105.1	0.134	-1111.8	0.134	-1117
0.135	-1117.2							0.27	-1054.1	0.135	-1075.1	0.135	-1080.8	0.135	-1089.2	0.135	-1092.2	0.135	-1097	0.135	-1096.2	0.135	-1100.9	0.135	-1105.8	0.135	-1112.3	0.135	-1117.2
0.136	-1117.3							0.272	-1054.3	0.136	-1075	0.136	-1081.4	0.136	-1089.8	0.136	-1092.1	0.136	-1096.1	0.136	-1096.7	0.136	-1102	0.136	-1105.7	0.136	-1112.8	0.136	-1117.3
0.137	-1118							0.274	-1054.7	0.137	-1075.2	0.137	-1080.8	0.137	-1089.4	0.137	-1091.8	0.137	-1095.5	0.137	-1097	0.137	-1101.9	0.137	-1106.6	0.137	-1113.1	0.137	-1118
0.138	-1117.9							0.276	-1055.1	0.138	-1075.5	0.138	-1081.4	0.138	-1090.4	0.138	-1092.5	0.138	-1095.8	0.138	-1096.7	0.138	-1102.1	0.138	-1107.3	0.138	-1113.4	0.138	-1117.9
0.139	-1117.7							0.278	-1054.5	0.139	-1075	0.139	-1081.4	0.139	-1090.4	0.139	-1092.3	0.139	-1096.1	0.139	-1097.4	0.139	-1102.7	0.139	-1107.5	0.139	-1113.2	0.139	-1117.7
0.14	-1118.9							0.28	-1055.8	0.14	-1074.3	0.14	-1081.4	0.14	-1090.5	0.14	-1092.6	0.14	-1097	0.14	-1097.4	0.14	-1103.5	0.14	-1109.2	0.14	-1114.1	0.14	-1118.9
0.141	-1118.4							0.282	-1055.9	0.141	-1074.2	0.141	-1081.4	0.141	-1091	0.141	-1092.9	0.141	-1097.2	0.141	-1097.6	0.141	-1103.7	0.141	-1107.2	0.141	-1113.1	0.141	-1118.4
0.142	-1119.4							0.284	-1056.4	0.142	-1074.4	0.142	-1082.1	0.142	-1090.9	0.142	-1093.5	0.142	-1096.7	0.142	-1098.7	0.142	-1104.2	0.142	-1107.2	0.142	-1113.9	0.142	-1119.4
0.143	-1119.6							0.286	-1055.9	0.143	-1074.4	0.143	-1081.8	0.143	-1090.9	0.143	-1093.6	0.143	-1097.3	0.143	-1098.7	0.143	-1104.4	0.143	-1107.6	0.143	-1113.9	0.143	-1119.6
0.144	-1120.5							0.288	-1055.7	0.144	-1074.5	0.144	-1082.1	0.144	-1090.8	0.144	-1093.5	0.144	-1098.2	0.144	-1099.5	0.144	-1104.6	0.144	-1107.8	0.144	-1114.2	0.144	-1120.5
0.145	-1120.8							0.29	-1055.8	0.145	-1075	0.145	-1081.7	0.145	-1090.4	0.145	-1093.7	0.145	-1097.8	0.145	-1099.7	0.145	-1104.3	0.145	-1108.3	0.145	-1115.1	0.145	-1120.8
0.146	-1121.1							0.292	-1055.2	0.146	-1075.1	0.146	-1081.9	0.146	-1090.8	0.146	-1093.7	0.146	-1099.1	0.146	-1099.9	0.146	-1104.9	0.146	-1109.5	0.146	-1115.9	0.146	-1121.1
0.147	-1121.5							0.294	-1056	0.147	-1074.4	0.147	-1082	0.147	-1090.6	0.147	-1093.6	0.147	-1099	0.147	-1100	0.147	-1104.9	0.147	-1110	0.147	-1115.2	0.147	-1121.5
0.148	-1121.9							0.296	-1056.8	0.148	-1074.5	0.148	-1081.8	0.148	-1090.9	0.148	-1093.4	0.148	-1099.3	0.148	-1100.9	0.148	-1105.4	0.148	-1110.5	0.148	-1116.1	0.148	-1121.9
0.149	-1122.7							0.298	-1056.8	0.149	-1074.4	0.149	-1081.6	0.149	-1091.4	0.149	-1093.7	0.149	-1099.1	0.149	-1101.1	0.149	-1105.4	0.149	-1110.2	0.149	-1116.4	0.149	-1122.7
0.15	-1122.6							0.3	-1056.9	0.15	-1074.2	0.15	-1082	0.15	-1091	0.15	-1093.4	0.15	-1099.2	0.15	-1100.5	0.15	-1105.7	0.15	-1110.7	0.15	-1116.6	0.15	-1122.6
0.151	-1122.5							0.302	-1057	0.151	-1074.3	0.151	-1081.5	0.151	-1090.9	0.151	-1093.7	0.151	-1099.6	0.151	-1100.7	0.151	-1106.1	0.151	-1110.8	0.151	-1117.2	0.151	-1122.5
0.152	-1122.7							0.304	-1057.4	0.152	-1074.5	0.152	-1081.9	0.152	-1091	0.152	-1094.3	0.152	-1099.4	0.152	-1101.5	0.152	-1106.3	0.152	-1111.2	0.152	-1117.7	0.152	-1122.7
0.153	-1123.4							0.306	-1057.8	0.153	-1074.1	0.153	-1081.5	0.153	-1090.8	0.153	-1094.3	0.153	-1099.5	0.153	-1101.7	0.153	-1106.1	0.153	-1111.7	0.153	-1117.7	0.153	-1123.4
0.154	-1123.7							0.308	-1058.3	0.154	-1073.9	0.154	-1081.8	0.154	-1091.1	0.154	-1094.4	0.154	-1099.4	0.154	-1101.8	0.154	-1106.9	0.154	-1112.2	0.154	-1118.3	0.154	-1123.7
0.155	-1123.5							0.31	-1058.2	0.155	-1073.3	0.155	-1081.4	0.155	-1090.5	0.155	-1094.6	0.155	-1099.8	0.155	-1102.2	0.155	-1106.6	0.155	-1111.9	0.155	-1118.5	0.155	-1123.5
0.156	-1124.2							0.312	-1058.8	0.156	-1073.7	0.156	-1081.9	0.156	-1090.4	0.156	-1094.9	0.156	-1099.9	0.156	-1102.4	0.156	-1108.1	0.156	-1112.9	0.156	-1119	0.156	-1124.2
0.157	-1124.1							0.314	-1058.5	0.157	-1073.4	0.157	-1080.9	0.157	-1090.3	0.157	-1095.3	0.157	-1100.3	0.157	-1103.1	0.157	-1107.8	0.157	-1113	0.157	-1119.2	0.157	-1124.1
0.158	-1124.6							0.316	-1059.3	0.158	-1073.1	0.158	-1080.7	0.158	-1090.6	0.158	-1093.7	0.158	-1100.5	0.158	-1102.1	0.158	-1108	0.158	-1113.5	0.158	-1119.3	0.158	-1124.6
0.159	-1125.1							0.318	-1060.2	0.159	-1073.2	0.159	-1080.6	0.159	-1091.1	0.159	-1094.1	0.159	-1100.8	0.159	-1102.8	0.159	-1108.8	0.159	-1113.2	0.159	-1119.7	0.159	-1125.1
0.16	-1125.5							0.32	-1059.9	0.16	-1072.8	0.16	-1080.9	0.16	-1092.1	0.16	-1094.1	0.16	-1101.1	0.16	-1103.1	0.16	-1109	0.16	-1113.7	0.16	-1120.5	0.16	-1125.5
0.161	-1125.5							0.322	-1060.7	0.161	-1071.5	0.161	-1080.7	0.161	-1090.7	0.161	-1094.7	0.161	-1101.3	0.161	-1103.4	0.161	-1109.3	0.161	-1113.1	0.161	-1120.8	0.161	-1125.5
0.162	-1125.5							0.324	-1060.9	0.162	-1071.8	0.162	-1080.6	0.162	-1090.6	0.162	-1094.9	0.162	-1101	0.162	-1103.3	0.162	-1110.7	0.162	-1113.7	0.162	-1121.2	0.162	-1125.5
0.163	-1126.2							0.326	-1061.4	0.163	-1070.9	0.163	-1080.7	0.163	-1091	0.163	-1095	0.163	-1101.3	0.163	-1103.8	0.163	-1110.3	0.163	-1113.9	0.163	-1121.6	0.163	-1126.2
0.164	-1126.4							0.328	-1061.4	0.164	-1070.7	0.164	-1080.8	0.164	-1090.9	0.164	-1095.6	0.164	-1101.1	0.164	-1103.9	0.164	-1111.2	0.164	-1114.1	0.164	-1121.6	0.164	-1126.4
0.165	-1126.8							0.33	-1061.4	0.165	-1070.8	0.165	-1080.5	0.165	-1089.9	0.165	-1095.5	0.165	-1100.7	0.165	-1104	0.165	-1110.1	0.165	-1114.7	0.165	-1122.4	0.165	-1126.8
0.166	-1127.7							0.332	-1061.8	0.166	-1070.5	0.166	-1079.8	0.166	-1090.1	0.166	-1096	0.166	-1100.9	0.166	-1104.6	0.166	-1110.4	0.166	-1114.6	0.166	-1122.8	0.166	-1127.7
0.167	-1126.6							0.334	-1061.7	0.167	-1070.7	0.167	-1079.5	0.167	-1089.8	0.167	-1096.4	0.167	-1101	0.167	-1104.7	0.167	-1110.1	0.167	-1114.9	0.167	-1122.9	0.167	-1126.6
0.168	-1127.4							0.336	-1062.1	0.168	-1070.2	0.168	-1077.8	0.168	-1089.5	0.168	-1096	0.168	-1100.7	0.168	-1104.5	0.168	-1111.1	0.168	-1115.1	0.168	-1123	0.168	-1127.4
0.169	-1127.2							0.338	-1063.3	0.169	-1069.6	0.169	-1076.5	0.169	-1089.4	0.169	-1096.2	0.169	-1101.1	0.169	-1104.7	0.169	-1111.2	0.169	-1115.3	0.169	-1122.7	0.169	-1127.2
0.17	-1128.4							0.34	-1062.5	0.17	-1068.2	0.17	-1076.8	0.17	-1089	0.17	-1096.4	0.17	-1101.4	0.17	-1104.8	0.17	-1111.8	0.17	-1115.9	0.17	-1123.1	0.17	-1128.4
0.171	-1128.6							0.342	-1062.5	0.171	-1068.1	0.171	-1077.1	0.171	-1089.5	0.171	-1096.8	0.171	-1101.5	0.171	-1104.9	0.171	-1111.2	0.171	-1116.3	0.171	-1123.1	0.171	-1128.6
0.172	-1129							0.344	-1062.8	0.172	-1068.2	0.172	-1077.4	0.172	-1088.5	0.172	-1096.7	0.172	-1102.4	0.172	-1105.5	0.172	-1111.1	0.172	-1116.5	0.172	-1124.1	0.172	-1129
0.173	-1128.7							0.346	-1062.7	0.173	-1068.2	0.173	-1076.8	0.173	-1088.9	0.173	-1096.8	0.173	-1101.7	0.173	-1106	0.173	-1111.4	0.173	-1117.2	0.173	-1123.8	0.173	-1128.7
0.174	-1129.1							0.348	-1063	0.174	-1068.1	0.174	-1076.6	0.174	-1089.1	0.174	-1096.5	0.174	-1102.2	0.174	-1106.5	0.174	-1112.2	0.174	-1117.6	0.174	-1124.4	0.174	-1129.1
0.175	-1129.6							0.35	-1063.7	0.175	-1067.9	0.175	-1076.6	0.175	-1088.8	0.175	-1096.4	0.175	-1102.7	0.175	-1106.9	0.175	-1112.1	0.175	-1118.4	0.175	-1123.7	0.175	-1129.6
0.176	-1129.9							0.352	-1063.6	0.176	-1067.1	0.176	-1076.6	0.176	-1088.3	0.176	-1095.7	0.176	-1102.8	0.176	-1107.2	0.176	-1112.2	0.176	-1118.6	0.176	-1124.1	0.176	-1129.9
0.177	-1129.6							0.354	-1063.1	0.177	-1067.7	0.177	-1076.8	0.177	-1088.3	0.177	-1094.9	0.177	-1103.3	0.177	-1106.3	0.177	-1113.7	0.177	-1118.7	0.177	-1124.3	0.177	-1129.6
0.178	-1130.7							0.356	-1063.1	0.178	-1066.7	0.178	-1076	0.178	-1088.5	0.178	-1095.2	0.178	-1103.1	0.178	-1106.5	0.178	-1112.9	0.178	-1118.6	0.178	-1124.1	0.178	-1130.7
0.179	-1131.4							0.358	-1063.3	0.179	-1066.8	0.179	-1076	0.179	-1088	0.179	-1094.6	0.179	-1102.6	0.179	-1107.1	0.179	-1114.3	0.179	-1119.6	0.179	-1124.4	0.179	-1131.4
0.18	-1131.3							0.36	-1063.1	0.18	-1066.1	0.18	-1075.8	0.18	-1086.9	0.18	-1095	0.18	-1101.6	0.18	-1106.8	0.18	-1114.3	0.18	-1119.5	0.18	-1124.5	0.18	-1131.3
0.181	-1131.8							0.362	-1063.4	0.181	-1066.4	0.181	-1075.4	0.181	-1087.3	0.181	-1094.2	0.181	-1101.6	0.181	-1107.1	0.181	-1113.9	0.181	-1119.5	0.181	-1124.3	0.181	-1131.8
0.182	-1132.1							0.364	-1062.9	0.182	-1065.9	0.182	-1075.4	0.182	-1087.4	0.182	-1093.5	0.182	-1100.7	0.182	-1107.1	0.182	-1114.3	0.182	-1119.5	0.182	-1124.4	0.182	-1132.1
0.183	-1132.6							0.366	-1063.1	0.183	-1065.6	0.183	-1075.3	0.183	-1086.9	0.183	-1093.6	0.183	-1101.6	0.183	-1107.4	0.183	-1114.2	0.183	-1119.8	0.183	-1124.6	0.183	-1132.6
0.184	-1130.4							0.368	-1062.8	0.184	-1065.4	0.184	-1074.9	0.184	-1086.1	0.184	-1093	0.184	-1101.4	0.184	-1108.5	0.184	-1114.9	0.184	-1120.9	0.184	-1124.4	0.184	-1130.4
0.185	-1129.6							0.37	-1062.6	0.185	-1064.9	0.185	-1075	0.185	-1086.2	0.185	-1092.8	0.185	-1101.7	0.185	-1108.2	0.185	-1115.1	0.185	-1121.4	0.185	-1124.8	0.185	-1129.6
0.186	-1130.6							0.372	-1061.7	0.186	-1064.8	0.186	-1075	0.186	-1085.3	0.186	-1092.5	0.186	-1102.2	0.186	-1108.5	0.186	-1115.9	0.186	-1121.9	0.186	-1125	0.186	-1130.6
0.187	-1130.8							0.374	-1062.1	0.187	-1064.8	0.187	-1074.3	0.187	-1084.5	0.187	-1091.8	0.187	-1102.4	0.187	-1108.8	0.187	-1115.4	0.187	-1123.1	0.187	-1125.4	0.187	-1130.8
0.188	-1131.2							0.376	-1062.2	0.188	-1064.3	0.188	-1074.7	0.188	-1083.7	0.188	-1091.7	0.188	-1102.7	0.188	-1109.4	0.188	-1116.4	0.188	-1122.2	0.188	-1125.9	0.188	-1131.2
0.189	-1131.8							0.378	-1061.2	0.189	-1063.6	0.189	-1073.5	0.189	-1083.5	0.189	-1091	0.189	-1102.2	0.189	-1110	0.189	-1116.4	0.189	-1122.1	0.189	-1125.9	0.189	-1131.8
0.19	-1132.5							0.38	-1061.7	0.19	-1063.2	0.19	-1073.8	0.19	-1083.9	0.19	-1091.1	0.19	-1102.6	0.19	-1110.4	0.19	-1116.6	0.19	-1122.3	0.19	-1126.3	0.19	-1132.5
0.191	-1132.1							0.382	-1061.5	0.191	-1062.4	0.191	-1072.4	0.191	-1082.6	0.191	-1091	0.191	-1101.7	0.191	-1109.9	0.191	-1116.4	0.191	-1121.9	0.191	-1126.8	0.191	-1132.1
0.192	-1132.9							0.384	-1061.5	0.192	-1061.4	0.192	-1073	0.192	-1081.7	0.192	-1091.4	0.192	-1102	0.192	-1110.9	0.192	-1116.6	0.192	-1122.1	0.192	-1127.4	0.192	-1132.9
0.193	-1133.4							0.386	-1061.9	0.193	-1061.1	0.193	-1072.3	0.193	-1082.5	0.193	-1090.7	0.193	-1102	0.193	-1111.1	0.193	-1116.9	0.193	-1123.2	0.193	-1127.8	0.193	-1133.4
0.194	-1133.8							0.388	-1062.4	0.194	-1061.1	0.194	-1071.8	0.194	-1081.9	0.194	-1090.3	0.194	-1101.8	0.194	-1111.3	0.194	-1117.3	0.194	-1123.3	0.194	-1127.9	0.194	-1133.8
0.195	-1134.1							0.39	-1062.2	0.195	-1060.7	0.195	-1070.8	0.195	-1081.7	0.195	-1089.9	0.195	-1101.6	0.195	-1110.7	0.195	-1117.5	0.195	-1122.9	0.195	-1128.3	0.195	-1134.1
0.196	-1134.6							0.392	-1062	0.196	-1060.3	0.196	-1070.2	0.196	-1081.2	0.196	-1089.6	0.196	-1101.1	0.196	-1110.6	0.196	-1117.7	0.196	-1123	0.196	-1128.4	0.196	-1134.6
0.197	-1134.9							0.394	-1061.3	0.197	-1059.8	0.197	-1069.3	0.197	-1080.8	0.197	-1088.9	0.197	-1100.5	0.197	-1110.8	0.197	-1117.3	0.197	-1123.5	0.197	-1128.5	0.197	-1134.9
0.198	-1135.1							0.396	-1061.6	0.198	-1060	0.198	-1069	0.198	-1079.2	0.198	-1088.9	0.198	-1101	0.198	-1111.3	0.198	-1117.8	0.198	-1123.9	0.198	-1128.8	0.198	-1135.1
0.199	-1135.5							0.398	-1061.8	0.199	-1059.5	0.199	-1069.1	0.199	-1079.6	0.199	-1088.9	0.199	-1100.5	0.199	-1111.2	0.199	-1117.5	0.199	-1123.7	0.199	-1129.2	0.199	-1135.5
0.2	-1135.7							0.4	-1061.5	0.2	-1058.8	0.2	-1068.8	0.2	-1078.5	0.2	-1088.3	0.2	-1100.5	0.2	-1111.3	0.2	-1117.9	0.2	-1124.6	0.2	-1129.3	0.2	-1135.7
0.201	-1135.6							0.402	-1060.7	0.201	-1059.2	0.201	-1068.5	0.201	-1079	0.201	-1088.3	0.201	-1100.6	0.201	-1111.2	0.201	-1118	0.201	-1124.5	0.201	-1130.2	0.201	-1135.6
0.202	-1136.2							0.404	-1060.3	0.202	-1059.5	0.202	-1068	0.202	-1077.7	0.202	-1087.8	0.202	-1100.6	0.202	-1111.2	0.202	-1118.7	0.202	-1124.8	0.202	-1130.1	0.202	-1136.2
0.203	-1135.7							0.406	-1060.6	0.203	-1058.8	0.203	-1067.2	0.203	-1077.9	0.203	-1087.8	0.203	-1100.6	0.203	-1111.1	0.203	-1118.6	0.203	-1125.2	0.203	-1130.2	0.203	-1135.7
0.204	-1135.4							0.408	-1060.4	0.204	-1058.4	0.204	-1066.2	0.204	-1077.2	0.204	-1087	0.204	-1100.8	0.204	-1111.6	0.204	-1119	0.204	-1125.7	0.204	-1130.2	0.204	-1135.4
0.205	-1135.4							0.41	-1059.7	0.205	-1058.2	0.205	-1065.9	0.205	-1077.2	0.205	-1086.5	0.205	-1101.4	0.205	-1111.2	0.205	-1118.3	0.205	-1125.9	0.205	-1131.7	0.205	-1135.4
0.206	-1135.5							0.412	-1059.4	0.206	-1057.6	0.206	-1065.2	0.206	-1076.3	0.206	-1086	0.206	-1101.3	0.206	-1111.6	0.206	-1119	0.206	-1125.9	0.206	-1131.9	0.206	-1135.5
0.207	-1136							0.414	-1058.9	0.207	-1058.3	0.207	-1064.6	0.207	-1076.1	0.207	-1086.1	0.207	-1101.4	0.207	-1111.3	0.207	-1119.2	0.207	-1124.9	0.207	-1132.1	0.207	-1136
0.208	-1136.4							0.416	-1058.9	0.208	-1058	0.208	-1063.8	0.208	-1075.9	0.208	-1085.4	0.208	-1101.2	0.208	-1112.2	0.208	-1119.5	0.208	-1126.1	0.208	-1132	0.208	-1136.4
0.209	-1137.5							0.418	-1058.6	0.209	-1057.4	0.209	-1063.5	0.209	-1075.5	0.209	-1084.8	0.209	-1100.6	0.209	-1112	0.209	-1119.5	0.209	-1126.1	0.209	-1132.5	0.209	-1137.5
0.21	-1137.5							0.42	-1058.6	0.21	-1056	0.21	-1063.3	0.21	-1075.7	0.21	-1084.9	0.21	-1101.3	0.21	-1112.5	0.21	-1119.6	0.21	-1126.3	0.21	-1132.2	0.21	-1137.5
0.211	-1137							0.422	-1058.1	0.211	-1056.6	0.211	-1062.9	0.211	-1075.3	0.211	-1084.1	0.211	-1100.7	0.211	-1112.7	0.211	-1119.7	0.211	-1126.7	0.211	-1132.7	0.211	-1137
0.212	-1138.3							0.424	-1058.9	0.212	-1056.3	0.212	-1061.9	0.212	-1075.1	0.212	-1084.1	0.212	-1101.1	0.212	-1112.8	0.212	-1120	0.212	-1126.8	0.212	-1132.9	0.212	-1138.3
0.213	-1138.1							0.426	-1058.6	0.213	-1056.2	0.213	-1061.7	0.213	-1074.2	0.213	-1084.6	0.213	-1100.7	0.213	-1113.1	0.213	-1119.1	0.213	-1127.1	0.213	-1133.8	0.213	-1138.1
0.214	-1138.4							0.428	-1058.2	0.214	-1056.1	0.214	-1061.6	0.214	-1073.9	0.214	-1084.3	0.214	-1100.7	0.214	-1113	0.214	-1119.2	0.214	-1127.4	0.214	-1133.3	0.214	-1138.4
0.215	-1138.4							0.43	-1057.9	0.215	-1056.8	0.215	-1061.2	0.215	-1073.7	0.215	-1082.7	0.215	-1100.6	0.215	-1112.8	0.215	-1120.5	0.215	-1128.1	0.215	-1133.7	0.215	-1138.4
0.216	-1138.9							0.432	-1058.3	0.216	-1056.7	0.216	-1060.1	0.216	-1073.5	0.216	-1082.5	0.216	-1100.6	0.216	-1112.8	0.216	-1120.8	0.216	-1126.9	0.216	-1134	0.216	-1138.9
0.217	-1138.8							0.434	-1057.7	0.217	-1056.9	0.217	-1059.5	0.217	-1072.6	0.217	-1083.6	0.217	-1100.7	0.217	-1112.9	0.217	-1121.3	0.217	-1128	0.217	-1134.3	0.217	-1138.8
0.218	-1138.8							0.436	-1057.5	0.218	-1057.3	0.218	-1059.9	0.218	-1072.3	0.218	-1082.7	0.218	-1100.3	0.218	-1113.1	0.218	-1120.9	0.218	-1128.2	0.218	-1134.4	0.218	-1138.8
0.219	-1139.4							0.438	-1056.9	0.219	-1057.1	0.219	-1059.6	0.219	-1071.3	0.219	-1082.2	0.219	-1100.3	0.219	-1112.3	0.219	-1121.5	0.219	-1127.9	0.219	-1134.8	0.219	-1139.4
0.22	-1139.7							0.44	-1056.9	0.22	-1056.8	0.22	-1059.4	0.22	-1070.5	0.22	-1082	0.22	-1100	0.22	-1112.8	0.22	-1121.5	0.22	-1128.1	0.22	-1135	0.22	-1139.7
0.221	-1139.6							0.442	-1056.3	0.221	-1057	0.221	-1058.8	0.221	-1069.4	0.221	-1081.8	0.221	-1100.1	0.221	-1112.8	0.221	-1121.5	0.221	-1127.9	0.221	-1135.1	0.221	-1139.6
0.222	-1140							0.444	-1057.1	0.222	-1056.7	0.222	-1059	0.222	-1068.6	0.222	-1081.2	0.222	-1099.7	0.222	-1112.7	0.222	-1122.8	0.222	-1128.6	0.222	-1135.5	0.222	-1140
0.223	-1140							0.446	-1055.7	0.223	-1056.7	0.223	-1058.4	0.223	-1068.1	0.223	-1080.7	0.223	-1099.6	0.223	-1113.2	0.223	-1122.2	0.223	-1129	0.223	-1135.7	0.223	-1140
0.224	-1140.3							0.448	-1055.8	0.224	-1056.5	0.224	-1058	0.224	-1066.8	0.224	-1081.4	0.224	-1098.9	0.224	-1113.1	0.224	-1122.3	0.224	-1129	0.224	-1135.7	0.224	-1140.3
0.225	-1140.9							0.45	-1055.3	0.225	-1055.8	0.225	-1057.9	0.225	-1066	0.225	-1079.3	0.225	-1099.5	0.225	-1113	0.225	-1122.1	0.225	-1128.7	0.225	-1136.1	0.225	-1140.9
0.226	-1141							0.452	-1055.8	0.226	-1055.8	0.226	-1057.9	0.226	-1065.8	0.226	-1079.6	0.226	-1099.1	0.226	-1111.4	0.226	-1122.5	0.226	-1129.6	0.226	-1136.2	0.226	-1141
0.227	-1140.9							0.454	-1055.8	0.227	-1056	0.227	-1057.9	0.227	-1065.3	0.227	-1079.4	0.227	-1098.8	0.227	-1111.3	0.227	-1121.9	0.227	-1129.2	0.227	-1136.4	0.227	-1140.9
0.228	-1141.6							0.456	-1055.2	0.228	-1055.6	0.228	-1057.4	0.228	-1064.6	0.228	-1079.7	0.228	-1098.6	0.228	-1112.4	0.228	-1122.3	0.228	-1129.9	0.228	-1136.5	0.228	-1141.6
0.229	-1141.9							0.458	-1054.9	0.229	-1055.1	0.229	-1057.5	0.229	-1063.5	0.229	-1078.8	0.229	-1098.2	0.229	-1112.8	0.229	-1122.8	0.229	-1130	0.229	-1137.1	0.229	-1141.9
0.23	-1142.1							0.46	-1054.7	0.23	-1055.5	0.23	-1056.5	0.23	-1063.5	0.23	-1078.9	0.23	-1098.7	0.23	-1113.4	0.23	-1122.8	0.23	-1130.4	0.23	-1137.1	0.23	-1142.1
0.231	-1142.1							0.462	-1055.3	0.231	-1055.3	0.231	-1056.9	0.231	-1062.8	0.231	-1078.7	0.231	-1098.9	0.231	-1113	0.231	-1123	0.231	-1130.3	0.231	-1137.3	0.231	-1142.1
0.232	-1142.7							0.464	-1055.2	0.232	-1055.2	0.232	-1056.5	0.232	-1063.2	0.232	-1078.7	0.232	-1099.6	0.232	-1113.5	0.232	-1122.7	0.232	-1130.8	0.232	-1137.3	0.232	-1142.7
0.233	-1142.9							0.466	-1055.5	0.233	-1054.9	0.233	-1056.6	0.233	-1062.5	0.233	-1077.9	0.233	-1099.1	0.233	-1112.9	0.233	-1123.6	0.233	-1131.5	0.233	-1137.8	0.233	-1142.9
0.234	-1143.5							0.468	-1054.5	0.234	-1054.4	0.234	-1056.1	0.234	-1062.4	0.234	-1078.2	0.234	-1099.9	0.234	-1112.8	0.234	-1123.5	0.234	-1132	0.234	-1137.4	0.234	-1143.5
0.235	-1142.9							0.47	-1054.8	0.235	-1054.6	0.235	-1055.6	0.235	-1062.2	0.235	-1077.9	0.235	-1097.6	0.235	-1113	0.235	-1123.5	0.235	-1132.2	0.235	-1137.6	0.235	-1142.9
0.236	-1143.5							0.472	-1055	0.236	-1055.3	0.236	-1056	0.236	-1062.3	0.236	-1076.9	0.236	-1098	0.236	-1112.4	0.236	-1123.7	0.236	-1131.5	0.236	-1137.4	0.236	-1143.5
0.237	-1144.1							0.474	-1055.8	0.237	-1055.4	0.237	-1056.5	0.237	-1062.1	0.237	-1076.6	0.237	-1096.9	0.237	-1112.7	0.237	-1124	0.237	-1131.9	0.237	-1137.8	0.237	-1144.1
0.238	-1144.2							0.476	-1056.1	0.238	-1055.7	0.238	-1055.8	0.238	-1061.5	0.238	-1075.7	0.238	-1097.4	0.238	-1111.8	0.238	-1123.9	0.238	-1131.6	0.238	-1137.6	0.238	-1144.2
0.239	-1143.9							0.478	-1056.3	0.239	-1056	0.239	-1056.3	0.239	-1061.1	0.239	-1075	0.239	-1097.8	0.239	-1112.2	0.239	-1124.8	0.239	-1132.2	0.239	-1138	0.239	-1143.9
0.24	-1144.8							0.48	-1055.2	0.24	-1055.3	0.24	-1055.9	0.24	-1061.5	0.24	-1074.6	0.24	-1097.7	0.24	-1112.2	0.24	-1124.4	0.24	-1132.5	0.24	-1138.4	0.24	-1144.8
0.241	-1144.7							0.482	-1056	0.241	-1055.2	0.241	-1056.3	0.241	-1061.6	0.241	-1075.1	0.241	-1097.7	0.241	-1111.2	0.241	-1125.6	0.241	-1132	0.241	-1136.3	0.241	-1144.7
0.242	-1145							0.484	-1055.3	0.242	-1055.4	0.242	-1055.9	0.242	-1061.7	0.242	-1073.9	0.242	-1095.9	0.242	-1111	0.242	-1125.2	0.242	-1132.1	0.242	-1136.7	0.242	-1145
0.243	-1145.9							0.486	-1055.5	0.243	-1055	0.243	-1056.4	0.243	-1061.1	0.243	-1073.9	0.243	-1096.6	0.243	-1110.7	0.243	-1125.7	0.243	-1132.8	0.243	-1136.8	0.243	-1145.9
0.244	-1145.7							0.488	-1055.3	0.244	-1055.2	0.244	-1056.5	0.244	-1060.6	0.244	-1073.7	0.244	-1096.1	0.244	-1111.2	0.244	-1125.7	0.244	-1132.7	0.244	-1138.5	0.244	-1145.7
0.245	-1146							0.49	-1055.3	0.245	-1055.1	0.245	-1056.1	0.245	-1060.9	0.245	-1073.5	0.245	-1096.6	0.245	-1110.7	0.245	-1126	0.245	-1134.1	0.245	-1138.3	0.245	-1146
0.246	-1145.5							0.492	-1054.9	0.246	-1055.2	0.246	-1055.4	0.246	-1061.1	0.246	-1072.9	0.246	-1096.3	0.246	-1111	0.246	-1126.2	0.246	-1134.1	0.246	-1138.9	0.246	-1145.5
0.247	-1146.3							0.494	-1055.3	0.247	-1055	0.247	-1056.3	0.247	-1061.5	0.247	-1072.2	0.247	-1096.2	0.247	-1111.2	0.247	-1126.4	0.247	-1135.4	0.247	-1139.4	0.247	-1146.3
0.248	-1146.8							0.496	-1055.7	0.248	-1055.5	0.248	-1055.8	0.248	-1061.1	0.248	-1072.4	0.248	-1096	0.248	-1111.7	0.248	-1126.6	0.248	-1135	0.248	-1139.2	0.248	-1146.8
0.249	-1147.3							0.498	-1056	0.249	-1055.5	0.249	-1056	0.249	-1060.6	0.249	-1072.8	0.249	-1095.6	0.249	-1110.7	0.249	-1126.8	0.249	-1135.9	0.249	-1139.8	0.249	-1147.3
0.25	-1147.7							0.5	-1056	0.25	-1055.3	0.25	-1056	0.25	-1060.6	0.25	-1072.8	0.25	-1095.8	0.25	-1110.5	0.25	-1127.2	0.25	-1135.7	0.25	-1140.2	0.25	-1147.7
0.251	-1148.1							0.502	-1055.3	0.251	-1055.8	0.251	-1056.1	0.251	-1060.5	0.251	-1073	0.251	-1095.6	0.251	-1108.5	0.251	-1127.4	0.251	-1135.9	0.251	-1140.5	0.251	-1148.1
0.252	-1148.1							0.504	-1055.8	0.252	-1055.9	0.252	-1056.8	0.252	-1060.5	0.252	-1072	0.252	-1095.2	0.252	-1108.9	0.252	-1128.4	0.252	-1135.7	0.252	-1140.4	0.252	-1148.1
0.253	-1148.6							0.506	-1056	0.253	-1055.9	0.253	-1056.5	0.253	-1061	0.253	-1072.4	0.253	-1094.7	0.253	-1109.6	0.253	-1127	0.253	-1135.3	0.253	-1140.7	0.253	-1148.6
0.254	-1148.1							0.508	-1055.4	0.254	-1056.1	0.254	-1056.9	0.254	-1060.5	0.254	-1071.3	0.254	-1095.4	0.254	-1109.3	0.254	-1126.9	0.254	-1135.2	0.254	-1140.7	0.254	-1148.1
0.255	-1148.5							0.51	-1056	0.255	-1056.6	0.255	-1057.1	0.255	-1061.1	0.255	-1071.2	0.255	-1094.4	0.255	-1109.6	0.255	-1127	0.255	-1135.6	0.255	-1140.7	0.255	-1148.5
0.256	-1149							0.512	-1055.1	0.256	-1056.3	0.256	-1057.6	0.256	-1060.6	0.256	-1069.7	0.256	-1094.7	0.256	-1110.1	0.256	-1125.9	0.256	-1135	0.256	-1140.9	0.256	-1149
0.257	-1148.7							0.514	-1055.7	0.257	-1057	0.257	-1057.7	0.257	-1061.1	0.257	-1069.6	0.257	-1094.1	0.257	-1108.7	0.257	-1126.6	0.257	-1135.2	0.257	-1141.4	0.257	-1148.7
0.258	-1149.6							0.516	-1055.8	0.258	-1056.5	0.258	-1058	0.258	-1060.9	0.258	-1068.6	0.258	-1093.9	0.258	-1109.1	0.258	-1126.7	0.258	-1135	0.258	-1141.5	0.258	-1149.6
0.259	-1149							0.518	-1056.4	0.259	-1056.6	0.259	-1057.9	0.259	-1061.2	0.259	-1068.9	0.259	-1093.7	0.259	-1108.6	0.259	-1126.4	0.259	-1135.4	0.259	-1142.2	0.259	-1149
0.26	-1149.2							0.52	-1056.1	0.26	-1057.3	0.26	-1057.9	0.26	-1061.2	0.26	-1068.9	0.26	-1093	0.26	-1109.1	0.26	-1126.7	0.26	-1135.2	0.26	-1142	0.26	-1149.2
0.261	-1149.2							0.522	-1056.3	0.261	-1057.2	0.261	-1058.5	0.261	-1061.4	0.261	-1068.7	0.261	-1093.6	0.261	-1110	0.261	-1126.8	0.261	-1135.3	0.261	-1141.9	0.261	-1149.2
0.262	-1149.3							0.524	-1057	0.262	-1057.1	0.262	-1058.5	0.262	-1061.3	0.262	-1067.5	0.262	-1092	0.262	-1108.7	0.262	-1127.4	0.262	-1135.3	0.262	-1142.4	0.262	-1149.3
0.263	-1149.7							0.526	-1057.2	0.263	-1057.2	0.263	-1058.6	0.263	-1061.6	0.263	-1067.8	0.263	-1091.9	0.263	-1109.2	0.263	-1127.2	0.263	-1135.7	0.263	-1142.5	0.263	-1149.7
0.264	-1149.5							0.528	-1057.5	0.264	-1057.6	0.264	-1058.6	0.264	-1061.3	0.264	-1067.4	0.264	-1090.8	0.264	-1109.4	0.264	-1127.2	0.264	-1135.2	0.264	-1142.5	0.264	-1149.5
0.265	-1149.4							0.53	-1057.8	0.265	-1057.1	0.265	-1058.5	0.265	-1061.6	0.265	-1067.4	0.265	-1091.3	0.265	-1109.6	0.265	-1128.2	0.265	-1135.2	0.265	-1142.5	0.265	-1149.4
0.266	-1149.3							0.532	-1058	0.266	-1057.5	0.266	-1058.9	0.266	-1061.4	0.266	-1067.5	0.266	-1090	0.266	-1108.9	0.266	-1127.3	0.266	-1135.7	0.266	-1142.6	0.266	-1149.3
0.267	-1148.9							0.534	-1058.4	0.267	-1058.1	0.267	-1058.6	0.267	-1061.9	0.267	-1068	0.267	-1089.3	0.267	-1109.6	0.267	-1127.4	0.267	-1135.5	0.267	-1143	0.267	-1148.9
0.268	-1149.5							0.536	-1058.7	0.268	-1057.6	0.268	-1058.7	0.268	-1061.7	0.268	-1068.7	0.268	-1089.2	0.268	-1109.6	0.268	-1128.4	0.268	-1136	0.268	-1143	0.268	-1149.5
0.269	-1150							0.538	-1058.5	0.269	-1057.7	0.269	-1059	0.269	-1061.5	0.269	-1067.9	0.269	-1089.8	0.269	-1109.9	0.269	-1128	0.269	-1135.9	0.269	-1143.1	0.269	-1150
0.27	-1149.6							0.54	-1058.8	0.27	-1058.1	0.27	-1058.8	0.27	-1061.3	0.27	-1068	0.27	-1090.1	0.27	-1110	0.27	-1127.5	0.27	-1136.4	0.27	-1143.2	0.27	-1149.6
0.271	-1149.6							0.542	-1059.3	0.271	-1058.6	0.271	-1059.4	0.271	-1062	0.271	-1067.9	0.271	-1089.3	0.271	-1110.5	0.271	-1128.2	0.271	-1136.1	0.271	-1143.4	0.271	-1149.6
0.272	-1149.8							0.544	-1059	0.272	-1058.4	0.272	-1059.2	0.272	-1061.7	0.272	-1067.9	0.272	-1089.7	0.272	-1111.1	0.272	-1128.4	0.272	-1136.6	0.272	-1142.6	0.272	-1149.8
0.273	-1149.8							0.546	-1059.4	0.273	-1057.9	0.273	-1059.3	0.273	-1061.8	0.273	-1068.1	0.273	-1089.7	0.273	-1109.7	0.273	-1128.8	0.273	-1137.1	0.273	-1142.8	0.273	-1149.8
0.274	-1149.8							0.548	-1060.1	0.274	-1058.4	0.274	-1059.4	0.274	-1061.7	0.274	-1068.1	0.274	-1090.7	0.274	-1110	0.274	-1128.4	0.274	-1137.6	0.274	-1143	0.274	-1149.8
0.275	-1149.5							0.55	-1060	0.275	-1058.5	0.275	-1059.5	0.275	-1062.3	0.275	-1067.8	0.275	-1088.3	0.275	-1109.8	0.275	-1129	0.275	-1137.8	0.275	-1143.1	0.275	-1149.5
0.276	-1150.1							0.552	-1060.4	0.276	-1058.4	0.276	-1059.7	0.276	-1061.9	0.276	-1068.1	0.276	-1087.8	0.276	-1109.9	0.276	-1128.7	0.276	-1138	0.276	-1142.6	0.276	-1150.1
0.277	-1149.8							0.554	-1059.9	0.277	-1058.6	0.277	-1059.8	0.277	-1062.2	0.277	-1068.2	0.277	-1087.8	0.277	-1109.9	0.277	-1128.3	0.277	-1138.2	0.277	-1143	0.277	-1149.8
0.278	-1149.8							0.556	-1059.1	0.278	-1058.8	0.278	-1059.6	0.278	-1062.1	0.278	-1068	0.278	-1086.9	0.278	-1109.7	0.278	-1128.2	0.278	-1138.1	0.278	-1142.7	0.278	-1149.8
0.279	-1149.6							0.558	-1059.6	0.279	-1059	0.279	-1060	0.279	-1062.4	0.279	-1067.9	0.279	-1086.7	0.279	-1110	0.279	-1128.4	0.279	-1138.5	0.279	-1143.2	0.279	-1149.6
0.28	-1150.6							0.56	-1059.4	0.28	-1058.9	0.28	-1060.2	0.28	-1062.9	0.28	-1067.9	0.28	-1086.2	0.28	-1109.2	0.28	-1128.8	0.28	-1138.8	0.28	-1143.1	0.28	-1150.6
0.281	-1150.1							0.562	-1059.9	0.281	-1059.3	0.281	-1060.7	0.281	-1063.3	0.281	-1067.6	0.281	-1086.2	0.281	-1110	0.281	-1128.3	0.281	-1139	0.281	-1142.9	0.281	-1150.1
0.282	-1149.9							0.564	-1059.7	0.282	-1059.1	0.282	-1060.3	0.282	-1063.3	0.282	-1067.7	0.282	-1085.6	0.282	-1109.8	0.282	-1129	0.282	-1139.3	0.282	-1143.7	0.282	-1149.9
0.283	-1149.9							0.566	-1059.6	0.283	-1059.5	0.283	-1060.3	0.283	-1063.6	0.283	-1068.1	0.283	-1084.7	0.283	-1109.5	0.283	-1128.7	0.283	-1139.6	0.283	-1143.6	0.283	-1149.9
0.284	-1151							0.568	-1060.1	0.284	-1059.6	0.284	-1060.6	0.284	-1063.9	0.284	-1067.8	0.284	-1085.1	0.284	-1109.3	0.284	-1128.6	0.284	-1139.7	0.284	-1143.7	0.284	-1151
0.285	-1150.6							0.57	-1059.5	0.285	-1060.6	0.285	-1060.5	0.285	-1063.7	0.285	-1067.9	0.285	-1084.8	0.285	-1109.2	0.285	-1128.2	0.285	-1139.8	0.285	-1143.8	0.285	-1150.6
0.286	-1151.2							0.572	-1060	0.286	-1059.5	0.286	-1060.7	0.286	-1064	0.286	-1067.9	0.286	-1084.6	0.286	-1109.2	0.286	-1128.3	0.286	-1139.9	0.286	-1144.2	0.286	-1151.2
0.287	-1151.2							0.574	-1059.9	0.287	-1059.5	0.287	-1060.7	0.287	-1064.1	0.287	-1067.8	0.287	-1083.7	0.287	-1109.6	0.287	-1128.2	0.287	-1139.8	0.287	-1144.4	0.287	-1151.2
0.288	-1151.3							0.576	-1060.1	0.288	-1060.2	0.288	-1060.7	0.288	-1064.5	0.288	-1067.6	0.288	-1083.6	0.288	-1109.4	0.288	-1128.3	0.288	-1139.8	0.288	-1144.5	0.288	-1151.3
0.289	-1151.8							0.578	-1059.9	0.289	-1060.1	0.289	-1060.7	0.289	-1064.5	0.289	-1068.4	0.289	-1083.5	0.289	-1108.8	0.289	-1128.2	0.289	-1138.8	0.289	-1145	0.289	-1151.8
0.29	-1151.7							0.58	-1060.2	0.29	-1060.1	0.29	-1061	0.29	-1064.8	0.29	-1068.3	0.29	-1083	0.29	-1108.3	0.29	-1127.9	0.29	-1138.9	0.29	-1145.7	0.29	-1151.7
0.291	-1152.1							0.582	-1060.2	0.291	-1060.9	0.291	-1060.9	0.291	-1064.8	0.291	-1067.6	0.291	-1082.4	0.291	-1107.4	0.291	-1128.4	0.291	-1139.3	0.291	-1145.7	0.291	-1152.1
0.292	-1151.5							0.584	-1060.3	0.292	-1060.7	0.292	-1061.4	0.292	-1065.1	0.292	-1067.9	0.292	-1081.5	0.292	-1106.3	0.292	-1127.9	0.292	-1138.6	0.292	-1146.3	0.292	-1151.5
0.293	-1152.1							0.586	-1060.4	0.293	-1060.8	0.293	-1061.2	0.293	-1065.4	0.293	-1068.3	0.293	-1081.6	0.293	-1106.8	0.293	-1127.9	0.293	-1139.1	0.293	-1145.6	0.293	-1152.1
0.294	-1152.2							0.588	-1059.7	0.294	-1060.8	0.294	-1061.7	0.294	-1065.4	0.294	-1067.9	0.294	-1081.4	0.294	-1106.4	0.294	-1127.8	0.294	-1139	0.294	-1145.7	0.294	-1152.2
0.295	-1152.2							0.59	-1060	0.295	-1061.5	0.295	-1061.7	0.295	-1065.9	0.295	-1068.1	0.295	-1081.8	0.295	-1106	0.295	-1127.6	0.295	-1138.6	0.295	-1146.1	0.295	-1152.2
0.296	-1152.2							0.592	-1060.1	0.296	-1060.8	0.296	-1062	0.296	-1065.9	0.296	-1068.1	0.296	-1081.9	0.296	-1106.3	0.296	-1127.9	0.296	-1136.7	0.296	-1146.2	0.296	-1152.2
0.297	-1152.4							0.594	-1059.8	0.297	-1061.3	0.297	-1061.9	0.297	-1065.7	0.297	-1068.5	0.297	-1083	0.297	-1106.4	0.297	-1128.1	0.297	-1136.8	0.297	-1146.2	0.297	-1152.4
0.298	-1152.1							0.596	-1060.4	0.298	-1061.7	0.298	-1061.6	0.298	-1066	0.298	-1068.4	0.298	-1081.5	0.298	-1106.4	0.298	-1127.9	0.298	-1136.5	0.298	-1146.3	0.298	-1152.1
0.299	-1152.3							0.598	-1060.2	0.299	-1061.4	0.299	-1062.5	0.299	-1066.3	0.299	-1068.3	0.299	-1080.9	0.299	-1106.2	0.299	-1128.5	0.299	-1137.2	0.299	-1146.4	0.299	-1152.3
0.3	-1152.2							0.6	-1060	0.3	-1062.1	0.3	-1062	0.3	-1066	0.3	-1068.5	0.3	-1081.4	0.3	-1105.6	0.3	-1128.4	0.3	-1137	0.3	-1145.6	0.3	-1152.2
0.301	-1152.9							0.602	-1059.4	0.301	-1062	0.301	-1062.6	0.301	-1066.5	0.301	-1068.6	0.301	-1081.2	0.301	-1106.5	0.301	-1128.5	0.301	-1136.9	0.301	-1145.8	0.301	-1152.9
0.302	-1153.3							0.604	-1059.7	0.302	-1062.3	0.302	-1062.9	0.302	-1066.9	0.302	-1068.5	0.302	-1081.4	0.302	-1107.2	0.302	-1128.6	0.302	-1137.8	0.302	-1145.8	0.302	-1153.3
0.303	-1153.1							0.606	-1060.9	0.303	-1062.7	0.303	-1062.8	0.303	-1067.8	0.303	-1067.7	0.303	-1081.4	0.303	-1107	0.303	-1128.9	0.303	-1137.7	0.303	-1145.6	0.303	-1153.1
0.304	-1153.5							0.608	-1060.1	0.304	-1062.2	0.304	-1063.1	0.304	-1067.4	0.304	-1068.7	0.304	-1081.2	0.304	-1105.9	0.304	-1128.7	0.304	-1138.1	0.304	-1145.9	0.304	-1153.5
0.305	-1153.3							0.61	-1060.1	0.305	-1062.5	0.305	-1063.1	0.305	-1067.5	0.305	-1068.1	0.305	-1080.5	0.305	-1106.4	0.305	-1128.9	0.305	-1137.8	0.305	-1146	0.305	-1153.3
0.306	-1153.3							0.612	-1060.4	0.306	-1062.7	0.306	-1063.6	0.306	-1067.2	0.306	-1068.4	0.306	-1080.1	0.306	-1106.7	0.306	-1129.2	0.306	-1138.3	0.306	-1146.2	0.306	-1153.3
0.307	-1153.2							0.614	-1060.4	0.307	-1062.5	0.307	-1063.2	0.307	-1066.9	0.307	-1068.1	0.307	-1079	0.307	-1106.3	0.307	-1130.3	0.307	-1137.9	0.307	-1146	0.307	-1153.2
0.308	-1153.7							0.616	-1059.1	0.308	-1062.4	0.308	-1063.5	0.308	-1066.8	0.308	-1067.8	0.308	-1077.8	0.308	-1106.5	0.308	-1127.7	0.308	-1139	0.308	-1145.6	0.308	-1153.7
0.309	-1153.3							0.618	-1059.5	0.309	-1062.8	0.309	-1063.8	0.309	-1066.5	0.309	-1068.2	0.309	-1077.8	0.309	-1105.8	0.309	-1128	0.309	-1138.7	0.309	-1145.9	0.309	-1153.3
0.31	-1154.2							0.62	-1059.5	0.31	-1063.1	0.31	-1063.8	0.31	-1066.8	0.31	-1068.5	0.31	-1077.2	0.31	-1104.3	0.31	-1128.3	0.31	-1138.8	0.31	-1145.8	0.31	-1154.2
0.311	-1153.5							0.622	-1060.1	0.311	-1063.3	0.311	-1063.9	0.311	-1066.8	0.311	-1068.3	0.311	-1077	0.311	-1102.1	0.311	-1128.1	0.311	-1138.9	0.311	-1146.2	0.311	-1153.5
0.312	-1154							0.624	-1060.6	0.312	-1063.2	0.312	-1064.4	0.312	-1066.8	0.312	-1068.9	0.312	-1077.3	0.312	-1101.1	0.312	-1127.8	0.312	-1139	0.312	-1146.4	0.312	-1154
0.313	-1153.2							0.626	-1061	0.313	-1063.6	0.313	-1064.5	0.313	-1067.7	0.313	-1069.1	0.313	-1076.6	0.313	-1100.2	0.313	-1127.8	0.313	-1139.3	0.313	-1146.4	0.313	-1153.2
0.314	-1153.9							0.628	-1061.5	0.314	-1063.5	0.314	-1064.4	0.314	-1067.1	0.314	-1069.7	0.314	-1076.3	0.314	-1101	0.314	-1127.8	0.314	-1138.9	0.314	-1146.5	0.314	-1153.9
0.315	-1153.8							0.63	-1061	0.315	-1064	0.315	-1064.5	0.315	-1068	0.315	-1069.1	0.315	-1076.6	0.315	-1100.2	0.315	-1127.8	0.315	-1139.3	0.315	-1146.9	0.315	-1153.8
0.316	-1154.2							0.632	-1060.3	0.316	-1064.3	0.316	-1064.7	0.316	-1067.8	0.316	-1069.5	0.316	-1076.4	0.316	-1100.2	0.316	-1127.7	0.316	-1139	0.316	-1146.5	0.316	-1154.2
0.317	-1153.9							0.634	-1060	0.317	-1064.5	0.317	-1064.7	0.317	-1068.2	0.317	-1069.6	0.317	-1076.5	0.317	-1099	0.317	-1127.4	0.317	-1138.4	0.317	-1147.1	0.317	-1153.9
0.318	-1153.7							0.636	-1060	0.318	-1064.5	0.318	-1064.6	0.318	-1068.6	0.318	-1070.1	0.318	-1076	0.318	-1097.9	0.318	-1127.6	0.318	-1138.5	0.318	-1146.8	0.318	-1153.7
0.319	-1153.5							0.638	-1060.1	0.319	-1064.8	0.319	-1064.9	0.319	-1068.4	0.319	-1070.1	0.319	-1075.3	0.319	-1097.8	0.319	-1127.3	0.319	-1138.5	0.319	-1147	0.319	-1153.5
0.32	-1154.4							0.64	-1059.8	0.32	-1064.5	0.32	-1065	0.32	-1068.3	0.32	-1070.5	0.32	-1075.1	0.32	-1097.9	0.32	-1127.3	0.32	-1139.4	0.32	-1146.8	0.32	-1154.4
0.321	-1153.8							0.642	-1059.6	0.321	-1064.5	0.321	-1065.5	0.321	-1068.5	0.321	-1071	0.321	-1075.6	0.321	-1097.2	0.321	-1126.8	0.321	-1139.3	0.321	-1147	0.321	-1153.8
0.322	-1154.6							0.644	-1059.4	0.322	-1064.3	0.322	-1065.2	0.322	-1069	0.322	-1070.7	0.322	-1074.1	0.322	-1096.7	0.322	-1127	0.322	-1139.3	0.322	-1147.1	0.322	-1154.6
0.323	-1155.2							0.646	-1059.7	0.323	-1064.9	0.323	-1065.7	0.323	-1069.3	0.323	-1070.8	0.323	-1074.3	0.323	-1097	0.323	-1127	0.323	-1139	0.323	-1147	0.323	-1155.2
0.324	-1155.4							0.648	-1059.8	0.324	-1065	0.324	-1065.4	0.324	-1069.6	0.324	-1070.6	0.324	-1073.9	0.324	-1097.1	0.324	-1126.6	0.324	-1139.4	0.324	-1146.9	0.324	-1155.4
0.325	-1155.8							0.65	-1060.1	0.325	-1065.3	0.325	-1065.9	0.325	-1069.3	0.325	-1071.1	0.325	-1073.7	0.325	-1097	0.325	-1126.7	0.325	-1139.1	0.325	-1147.2	0.325	-1155.8
0.326	-1156.1							0.652	-1060.3	0.326	-1064.9	0.326	-1066.3	0.326	-1069.7	0.326	-1071.2	0.326	-1074	0.326	-1096.4	0.326	-1127	0.326	-1138.9	0.326	-1146.8	0.326	-1156.1
0.327	-1155.5							0.654	-1060.3	0.327	-1065.5	0.327	-1066.8	0.327	-1069.6	0.327	-1071.4	0.327	-1074.2	0.327	-1095.9	0.327	-1124.8	0.327	-1138.9	0.327	-1146.8	0.327	-1155.5
0.328	-1155.8							0.656	-1060.2	0.328	-1065.1	0.328	-1066.5	0.328	-1070.1	0.328	-1071.8	0.328	-1073.4	0.328	-1095.2	0.328	-1125.8	0.328	-1138.6	0.328	-1146.9	0.328	-1155.8
0.329	-1155.9							0.658	-1060.3	0.329	-1065.9	0.329	-1066.8	0.329	-1069.8	0.329	-1072	0.329	-1073.3	0.329	-1094.5	0.329	-1125.7	0.329	-1138.9	0.329	-1146.6	0.329	-1155.9
0.33	-1156							0.66	-1060.3	0.33	-1065.7	0.33	-1067.5	0.33	-1070.4	0.33	-1072	0.33	-1073.1	0.33	-1093.7	0.33	-1125.2	0.33	-1138.7	0.33	-1146.1	0.33	-1156
0.331	-1155.9							0.662	-1059.8	0.331	-1065.9	0.331	-1067.2	0.331	-1070.7	0.331	-1072.6	0.331	-1073.7	0.331	-1094.5	0.331	-1125.1	0.331	-1138.1	0.331	-1146.4	0.331	-1155.9
0.332	-1155.9							0.664	-1059.6	0.332	-1065.8	0.332	-1067.3	0.332	-1070.8	0.332	-1072.8	0.332	-1073.6	0.332	-1094.1	0.332	-1125.4	0.332	-1138.4	0.332	-1145.8	0.332	-1155.9
0.333	-1156.9							0.666	-1059.5	0.333	-1066.8	0.333	-1067.9	0.333	-1070.6	0.333	-1073.8	0.333	-1073.8	0.333	-1094.3	0.333	-1125.5	0.333	-1138.6	0.333	-1145.9	0.333	-1156.9
0.334	-1154.8							0.668	-1059.1	0.334	-1066.5	0.334	-1068.1	0.334	-1071.2	0.334	-1074.1	0.334	-1073.9	0.334	-1094.4	0.334	-1126.3	0.334	-1138.4	0.334	-1145.9	0.334	-1154.8
0.335	-1155.1							0.67	-1059.4	0.335	-1066.7	0.335	-1068	0.335	-1071.5	0.335	-1074.5	0.335	-1073.7	0.335	-1094.4	0.335	-1126.3	0.335	-1137.7	0.335	-1146	0.335	-1155.1
0.336	-1154.2							0.672	-1059	0.336	-1067	0.336	-1068.1	0.336	-1072.4	0.336	-1074.7	0.336	-1074.5	0.336	-1094.6	0.336	-1124.9	0.336	-1136.8	0.336	-1145.5	0.336	-1154.2
0.337	-1154.6							0.674	-1059.1	0.337	-1067.4	0.337	-1068.2	0.337	-1072.1	0.337	-1074.1	0.337	-1075.4	0.337	-1094.7	0.337	-1125.3	0.337	-1137.8	0.337	-1146.3	0.337	-1154.6
0.338	-1154.2							0.676	-1059.2	0.338	-1067.8	0.338	-1068.4	0.338	-1072.5	0.338	-1074.5	0.338	-1075	0.338	-1093.6	0.338	-1125.1	0.338	-1137.5	0.338	-1145.5	0.338	-1154.2
0.339	-1153.9							0.678	-1059.2	0.339	-1068	0.339	-1068.6	0.339	-1072.6	0.339	-1074.8	0.339	-1075.4	0.339	-1093.7	0.339	-1125	0.339	-1137.4	0.339	-1146.1	0.339	-1153.9
0.34	-1154.2							0.68	-1059.9	0.34	-1068	0.34	-1068.6	0.34	-1072.4	0.34	-1075.5	0.34	-1075.7	0.34	-1093.3	0.34	-1124.7	0.34	-1137.3	0.34	-1146.1	0.34	-1154.2
0.341	-1155.1							0.682	-1060.1	0.341	-1068.5	0.341	-1069.1	0.341	-1073	0.341	-1075.5	0.341	-1076.1	0.341	-1092.6	0.341	-1125.1	0.341	-1136.8	0.341	-1146	0.341	-1155.1
0.342	-1154.2							0.684	-1059.6	0.342	-1068.4	0.342	-1069.6	0.342	-1073.2	0.342	-1075.9	0.342	-1075.4	0.342	-1092.1	0.342	-1125.2	0.342	-1136.9	0.342	-1144.8	0.342	-1154.2
0.343	-1154.3							0.686	-1059.1	0.343	-1068.4	0.343	-1069.6	0.343	-1072.7	0.343	-1076	0.343	-1076.6	0.343	-1091.8	0.343	-1125.1	0.343	-1136.9	0.343	-1145.7	0.343	-1154.3
0.344	-1154.4							0.688	-1059.5	0.344	-1068.9	0.344	-1069.7	0.344	-1074	0.344	-1076.9	0.344	-1076.7	0.344	-1091.7	0.344	-1125.6	0.344	-1136	0.344	-1145.7	0.344	-1154.4
0.345	-1153.8							0.69	-1059.7	0.345	-1068.9	0.345	-1069.9	0.345	-1074.5	0.345	-1077	0.345	-1077.3	0.345	-1090.7	0.345	-1124.1	0.345	-1136.5	0.345	-1145.2	0.345	-1153.8
0.346	-1152.7							0.692	-1059.9	0.346	-1068.9	0.346	-1070	0.346	-1074.5	0.346	-1077.1	0.346	-1077.6	0.346	-1091	0.346	-1123.8	0.346	-1136.1	0.346	-1145.3	0.346	-1152.7
0.347	-1153.2							0.694	-1059.3	0.347	-1069.7	0.347	-1070.9	0.347	-1074.6	0.347	-1077.1	0.347	-1077.7	0.347	-1091.3	0.347	-1123.2	0.347	-1136.8	0.347	-1145.9	0.347	-1153.2
0.348	-1152.3							0.696	-1059.5	0.348	-1069.8	0.348	-1070.5	0.348	-1075	0.348	-1076.8	0.348	-1077.5	0.348	-1090.7	0.348	-1123.9	0.348	-1136	0.348	-1145.2	0.348	-1152.3
0.349	-1151.5							0.698	-1060.1	0.349	-1069.9	0.349	-1071	0.349	-1074.8	0.349	-1076.8	0.349	-1077.5	0.349	-1089.8	0.349	-1123.1	0.349	-1136.6	0.349	-1145.3	0.349	-1151.5
0.35	-1151.5							0.7	-1059.9	0.35	-1069.3	0.35	-1071.2	0.35	-1074.9	0.35	-1076.4	0.35	-1077.5	0.35	-1089.9	0.35	-1122.1	0.35	-1135.8	0.35	-1145.2	0.35	-1151.5
0.351	-1152							0.702	-1059.2	0.351	-1069.2	0.351	-1071.4	0.351	-1075.3	0.351	-1076.9	0.351	-1077.3	0.351	-1088.8	0.351	-1122.9	0.351	-1136.1	0.351	-1145.3	0.351	-1152
0.352	-1151.5							0.704	-1059.8	0.352	-1069.6	0.352	-1070.9	0.352	-1075.8	0.352	-1076.9	0.352	-1077.2	0.352	-1089.7	0.352	-1123.3	0.352	-1136	0.352	-1145.1	0.352	-1151.5
0.353	-1151.9							0.706	-1058.8	0.353	-1070	0.353	-1071.3	0.353	-1076	0.353	-1077.6	0.353	-1077.7	0.353	-1088	0.353	-1123.3	0.353	-1135.3	0.353	-1145.3	0.353	-1151.9
0.354	-1151.6							0.708	-1058.1	0.354	-1069.7	0.354	-1071.3	0.354	-1075.1	0.354	-1077.8	0.354	-1078.2	0.354	-1088.3	0.354	-1123.4	0.354	-1135.1	0.354	-1145	0.354	-1151.6
0.355	-1151.7							0.71	-1058.7	0.355	-1070.4	0.355	-1071.6	0.355	-1076	0.355	-1078.1	0.355	-1077.8	0.355	-1087.8	0.355	-1123.5	0.355	-1134.6	0.355	-1145.2	0.355	-1151.7
0.356	-1151.4							0.712	-1058.7	0.356	-1070.2	0.356	-1071.5	0.356	-1076.1	0.356	-1077.6	0.356	-1078.2	0.356	-1087.6	0.356	-1122.9	0.356	-1134.5	0.356	-1144.6	0.356	-1151.4
0.357	-1151.6							0.714	-1057.4	0.357	-1070.2	0.357	-1071.6	0.357	-1075.9	0.357	-1078.5	0.357	-1077.9	0.357	-1087.1	0.357	-1122.7	0.357	-1134.2	0.357	-1145.1	0.357	-1151.6
0.358	-1151.1							0.716	-1057.9	0.358	-1070.7	0.358	-1071.8	0.358	-1076.5	0.358	-1077.7	0.358	-1078.5	0.358	-1086.9	0.358	-1123.2	0.358	-1134.3	0.358	-1144.6	0.358	-1151.1
0.359	-1151.6							0.718	-1057.9	0.359	-1071.3	0.359	-1072.4	0.359	-1076.3	0.359	-1078	0.359	-1078.9	0.359	-1085.7	0.359	-1123.3	0.359	-1133.8	0.359	-1144.5	0.359	-1151.6
0.36	-1151.6							0.72	-1057.4	0.36	-1071.3	0.36	-1072.4	0.36	-1076.6	0.36	-1078.8	0.36	-1079.6	0.36	-1086.3	0.36	-1122.9	0.36	-1134.5	0.36	-1142.6	0.36	-1151.6
0.361	-1151.3							0.722	-1057.4	0.361	-1071.4	0.361	-1072.8	0.361	-1076.5	0.361	-1078.7	0.361	-1080	0.361	-1085.7	0.361	-1122.9	0.361	-1134.3	0.361	-1141.7	0.361	-1151.3
0.362	-1151.3							0.724	-1057	0.362	-1072.2	0.362	-1072.9	0.362	-1077.1	0.362	-1079.5	0.362	-1079.7	0.362	-1086.3	0.362	-1119.1	0.362	-1134.4	0.362	-1143.7	0.362	-1151.3
0.363	-1151.3							0.726	-1057	0.363	-1072	0.363	-1073.2	0.363	-1077.2	0.363	-1079.5	0.363	-1080	0.363	-1085.9	0.363	-1118.3	0.363	-1133.2	0.363	-1143.3	0.363	-1151.3
0.364	-1151.5							0.728	-1057.1	0.364	-1071.9	0.364	-1072.4	0.364	-1077.6	0.364	-1079.5	0.364	-1080.4	0.364	-1085.1	0.364	-1118.3	0.364	-1132.9	0.364	-1143.4	0.364	-1151.5
0.365	-1151.3							0.73	-1057	0.365	-1072.4	0.365	-1073.1	0.365	-1077.9	0.365	-1079.6	0.365	-1080.7	0.365	-1085	0.365	-1118.2	0.365	-1133	0.365	-1143.3	0.365	-1151.3
0.366	-1151.3							0.732	-1056.9	0.366	-1072.4	0.366	-1073.4	0.366	-1078.1	0.366	-1080	0.366	-1080.4	0.366	-1084.9	0.366	-1118.4	0.366	-1132.8	0.366	-1141.7	0.366	-1151.3
0.367	-1150.6							0.734	-1056.6	0.367	-1072.7	0.367	-1073.7	0.367	-1077.9	0.367	-1080.1	0.367	-1080.5	0.367	-1084.3	0.367	-1117.6	0.367	-1132.5	0.367	-1142.2	0.367	-1150.6
0.368	-1150.8							0.736	-1056.5	0.368	-1073.1	0.368	-1073.7	0.368	-1078.7	0.368	-1080.5	0.368	-1080.3	0.368	-1084.1	0.368	-1117.8	0.368	-1132.7	0.368	-1141.5	0.368	-1150.8
0.369	-1150.9							0.738	-1056.3	0.369	-1072.9	0.369	-1074	0.369	-1078.5	0.369	-1080.5	0.369	-1081.2	0.369	-1084.4	0.369	-1116.5	0.369	-1132.8	0.369	-1141.5	0.369	-1150.9
0.37	-1150.1							0.74	-1055.6	0.37	-1072.7	0.37	-1074	0.37	-1078.6	0.37	-1080.5	0.37	-1080.8	0.37	-1084.2	0.37	-1116.3	0.37	-1131	0.37	-1141.4	0.37	-1150.1
0.371	-1150.6							0.742	-1055.7	0.371	-1073.5	0.371	-1074.2	0.371	-1078.4	0.371	-1080.8	0.371	-1081.3	0.371	-1083.7	0.371	-1116.2	0.371	-1131.7	0.371	-1141.2	0.371	-1150.6
0.372	-1150.5							0.744	-1056.1	0.372	-1073.5	0.372	-1074.6	0.372	-1078.6	0.372	-1081.1	0.372	-1081.7	0.372	-1084.9	0.372	-1115.8	0.372	-1131.4	0.372	-1141.7	0.372	-1150.5
0.373	-1149.4							0.746	-1055.6	0.373	-1073.1	0.373	-1075.9	0.373	-1078.9	0.373	-1080.8	0.373	-1082.5	0.373	-1084.6	0.373	-1115.6	0.373	-1132.1	0.373	-1141	0.373	-1149.4
0.374	-1149.1							0.748	-1055.8	0.374	-1071.9	0.374	-1075.5	0.374	-1079	0.374	-1080.6	0.374	-1082.7	0.374	-1084.8	0.374	-1115.4	0.374	-1132.4	0.374	-1141.2	0.374	-1149.1
0.375	-1148.5							0.75	-1056.4	0.375	-1072.5	0.375	-1075	0.375	-1079.1	0.375	-1081.1	0.375	-1083.2	0.375	-1085.7	0.375	-1114.4	0.375	-1132.2	0.375	-1140.5	0.375	-1148.5
0.376	-1149.1							0.752	-1056.7	0.376	-1071.7	0.376	-1074.5	0.376	-1079.2	0.376	-1081	0.376	-1083.3	0.376	-1086	0.376	-1115	0.376	-1131.5	0.376	-1141.4	0.376	-1149.1
0.377	-1148.9							0.754	-1055.4	0.377	-1072.3	0.377	-1074.7	0.377	-1079.4	0.377	-1081	0.377	-1083.5	0.377	-1086.1	0.377	-1114.2	0.377	-1132.1	0.377	-1141	0.377	-1148.9
0.378	-1148							0.756	-1055.8	0.378	-1072.3	0.378	-1074.5	0.378	-1079.2	0.378	-1081.2	0.378	-1083.3	0.378	-1086.1	0.378	-1113.6	0.378	-1131.9	0.378	-1140.8	0.378	-1148
0.379	-1148							0.758	-1056.2	0.379	-1072.4	0.379	-1074.9	0.379	-1079.7	0.379	-1081.2	0.379	-1084	0.379	-1086.7	0.379	-1113.1	0.379	-1132	0.379	-1141	0.379	-1148
0.38	-1149							0.76	-1055.7	0.38	-1072.5	0.38	-1074.7	0.38	-1079.5	0.38	-1081.5	0.38	-1083.5	0.38	-1086.4	0.38	-1113	0.38	-1131.2	0.38	-1141	0.38	-1149
0.381	-1149							0.762	-1056.7	0.381	-1072.9	0.381	-1074.4	0.381	-1079.8	0.381	-1081.7	0.381	-1084.3	0.381	-1085.3	0.381	-1112.5	0.381	-1131	0.381	-1139.1	0.381	-1149
0.382	-1148.1							0.764	-1056.5	0.382	-1072.7	0.382	-1074.1	0.382	-1079.3	0.382	-1082.1	0.382	-1084	0.382	-1085.9	0.382	-1111.6	0.382	-1131	0.382	-1139	0.382	-1148.1
0.383	-1147.9							0.766	-1056.3	0.383	-1072.6	0.383	-1074.2	0.383	-1079.4	0.383	-1082.6	0.383	-1084.4	0.383	-1086.1	0.383	-1111.7	0.383	-1130.8	0.383	-1139.2	0.383	-1147.9
0.384	-1147.9							0.768	-1055.7	0.384	-1072.7	0.384	-1074.7	0.384	-1079.9	0.384	-1083.1	0.384	-1083.4	0.384	-1086	0.384	-1111.1	0.384	-1130.4	0.384	-1138.2	0.384	-1147.9
0.385	-1148.2							0.77	-1055.8	0.385	-1072.9	0.385	-1074.8	0.385	-1080.1	0.385	-1084	0.385	-1084.6	0.385	-1085.7	0.385	-1110.7	0.385	-1129.5	0.385	-1134.5	0.385	-1148.2
0.386	-1146.9							0.772	-1056.1	0.386	-1072.8	0.386	-1074.4	0.386	-1080.1	0.386	-1084	0.386	-1084.8	0.386	-1085.3	0.386	-1110.5	0.386	-1128.9	0.386	-1134.5	0.386	-1146.9
0.387	-1147.5							0.774	-1056.3	0.387	-1072.4	0.387	-1074.7	0.387	-1080.3	0.387	-1084.2	0.387	-1084.8	0.387	-1085.4	0.387	-1110.1	0.387	-1128.5	0.387	-1134.5	0.387	-1147.5
0.388	-1147.4							0.776	-1055.7	0.388	-1072.1	0.388	-1074.6	0.388	-1080.3	0.388	-1085.1	0.388	-1084.4	0.388	-1085.3	0.388	-1109.1	0.388	-1128.2	0.388	-1134	0.388	-1147.4
0.389	-1146.9							0.778	-1056.5	0.389	-1071.8	0.389	-1075	0.389	-1080.3	0.389	-1082.6	0.389	-1085.5	0.389	-1084.7	0.389	-1109.4	0.389	-1128.7	0.389	-1134.6	0.389	-1146.9
0.39	-1146.4							0.78	-1053.9	0.39	-1072.1	0.39	-1074.9	0.39	-1080.6	0.39	-1083.1	0.39	-1085	0.39	-1085.3	0.39	-1108.3	0.39	-1127.7	0.39	-1134.1	0.39	-1146.4
0.391	-1146.2							0.782	-1054.5	0.391	-1072.4	0.391	-1075.6	0.391	-1081.2	0.391	-1082.8	0.391	-1084.6	0.391	-1084.9	0.391	-1108.2	0.391	-1127.6	0.391	-1136.1	0.391	-1146.2
0.392	-1146							0.784	-1055.1	0.392	-1072.3	0.392	-1075.1	0.392	-1080.6	0.392	-1083.7	0.392	-1084.6	0.392	-1085.6	0.392	-1108	0.392	-1126	0.392	-1136.1	0.392	-1146
0.393	-1145.5							0.786	-1055.4	0.393	-1072.4	0.393	-1074.9	0.393	-1081.2	0.393	-1084	0.393	-1084.6	0.393	-1086.1	0.393	-1107	0.393	-1127.1	0.393	-1136.4	0.393	-1145.5
0.394	-1144.4							0.788	-1055.7	0.394	-1073	0.394	-1074.5	0.394	-1080.6	0.394	-1084.1	0.394	-1084.9	0.394	-1085.9	0.394	-1106.6	0.394	-1126.6	0.394	-1134.9	0.394	-1144.4
0.395	-1145.2							0.79	-1056	0.395	-1073.1	0.395	-1075.5	0.395	-1081	0.395	-1084	0.395	-1085	0.395	-1086.7	0.395	-1106.4	0.395	-1126.6	0.395	-1135.5	0.395	-1145.2
0.396	-1144.2							0.792	-1055.7	0.396	-1072.3	0.396	-1074.5	0.396	-1080.9	0.396	-1083.3	0.396	-1085.1	0.396	-1086.7	0.396	-1106.1	0.396	-1126.6	0.396	-1135	0.396	-1144.2
0.397	-1144.3							0.794	-1056.1	0.397	-1072.4	0.397	-1075	0.397	-1081.4	0.397	-1083.3	0.397	-1085.1	0.397	-1087.3	0.397	-1105.3	0.397	-1126.6	0.397	-1134.7	0.397	-1144.3
0.398	-1143.6							0.796	-1056.2	0.398	-1072.3	0.398	-1075.3	0.398	-1081.4	0.398	-1083	0.398	-1085.3	0.398	-1086.9	0.398	-1105.3	0.398	-1126.1	0.398	-1134.7	0.398	-1143.6
0.399	-1143.7							0.798	-1056.5	0.399	-1071.9	0.399	-1075.3	0.399	-1082.4	0.399	-1082.8	0.399	-1085.3	0.399	-1086.8	0.399	-1105	0.399	-1126.4	0.399	-1134.2	0.399	-1143.7
0.4	-1142.7							0.8	-1056.2	0.4	-1072.3	0.4	-1075.3	0.4	-1081.4	0.4	-1082.6	0.4	-1086.1	0.4	-1087.4	0.4	-1105	0.4	-1126.4	0.4	-1134	0.4	-1142.7
0.401	-1143.2							0.802	-1056.2	0.401	-1072.6	0.401	-1075.7	0.401	-1081.7	0.401	-1083.1	0.401	-1085.9	0.401	-1087.5	0.401	-1104.9	0.401	-1126.2	0.401	-1133.9	0.401	-1143.2
0.402	-1142.3							0.804	-1055.9	0.402	-1072.4	0.402	-1075.9	0.402	-1081.5	0.402	-1082.4	0.402	-1086.2	0.402	-1088	0.402	-1103.9	0.402	-1126.6	0.402	-1133.8	0.402	-1142.3
0.403	-1142.5							0.806	-1056.1	0.403	-1072.3	0.403	-1076	0.403	-1081.4	0.403	-1083	0.403	-1087.2	0.403	-1088.1	0.403	-1104	0.403	-1125.4	0.403	-1133.5	0.403	-1142.5
0.404	-1142							0.808	-1056.2	0.404	-1072.2	0.404	-1076.3	0.404	-1081.9	0.404	-1082.3	0.404	-1088.1	0.404	-1089.4	0.404	-1102.7	0.404	-1124.7	0.404	-1132.9	0.404	-1142
0.405	-1141.9							0.81	-1056.1	0.405	-1072.4	0.405	-1076.5	0.405	-1081.5	0.405	-1083	0.405	-1088.3	0.405	-1086.8	0.405	-1102.5	0.405	-1124.8	0.405	-1133	0.405	-1141.9
0.406	-1141.6							0.812	-1055.8	0.406	-1072.3	0.406	-1076.7	0.406	-1081.9	0.406	-1082.6	0.406	-1087.9	0.406	-1087.4	0.406	-1102.7	0.406	-1124.4	0.406	-1132.7	0.406	-1141.6
0.407	-1141.5							0.814	-1055.9	0.407	-1072.5	0.407	-1076.6	0.407	-1082.9	0.407	-1083.1	0.407	-1088.5	0.407	-1087.6	0.407	-1101.4	0.407	-1124.5	0.407	-1132.5	0.407	-1141.5
0.408	-1140.9							0.816	-1056.2	0.408	-1072.7	0.408	-1076.7	0.408	-1082.1	0.408	-1082.8	0.408	-1088.5	0.408	-1088.4	0.408	-1101.7	0.408	-1124	0.408	-1131.3	0.408	-1140.9
0.409	-1141.2							0.818	-1056.9	0.409	-1072.7	0.409	-1077.1	0.409	-1082.6	0.409	-1083.1	0.409	-1088.8	0.409	-1088.4	0.409	-1102.6	0.409	-1124.3	0.409	-1131.5	0.409	-1141.2
0.41	-1140.8							0.82	-1056.9	0.41	-1072.3	0.41	-1076.1	0.41	-1082.1	0.41	-1083	0.41	-1088.6	0.41	-1088.6	0.41	-1102.7	0.41	-1124.2	0.41	-1130	0.41	-1140.8
0.411	-1140.2							0.822	-1056.9	0.411	-1071.6	0.411	-1076.3	0.411	-1082.5	0.411	-1082.1	0.411	-1088.3	0.411	-1088.5	0.411	-1102.5	0.411	-1124.4	0.411	-1129.9	0.411	-1140.2
0.412	-1139.8							0.824	-1057.2	0.412	-1072.1	0.412	-1075.9	0.412	-1081.5	0.412	-1082.4	0.412	-1088.6	0.412	-1088.6	0.412	-1102	0.412	-1123.1	0.412	-1129.7	0.412	-1139.8
0.413	-1139.9							0.826	-1057.4	0.413	-1072	0.413	-1076.1	0.413	-1082	0.413	-1082.3	0.413	-1088.7	0.413	-1088.3	0.413	-1102.3	0.413	-1121.7	0.413	-1129.5	0.413	-1139.9
0.414	-1139.3							0.828	-1057.7	0.414	-1071.5	0.414	-1076	0.414	-1082	0.414	-1082.4	0.414	-1087.2	0.414	-1088.7	0.414	-1102.1	0.414	-1121	0.414	-1129.1	0.414	-1139.3
0.415	-1139.7							0.83	-1057.7	0.415	-1071.8	0.415	-1076	0.415	-1082.5	0.415	-1081.9	0.415	-1087.7	0.415	-1088.5	0.415	-1101.8	0.415	-1120.8	0.415	-1128.9	0.415	-1139.7
0.416	-1139.6							0.832	-1057.9	0.416	-1071.8	0.416	-1075.7	0.416	-1081.3	0.416	-1081.9	0.416	-1087.4	0.416	-1088.9	0.416	-1100.6	0.416	-1120.5	0.416	-1128.8	0.416	-1139.6
0.417	-1139.4							0.834	-1057.9	0.417	-1072.3	0.417	-1075.6	0.417	-1081.5	0.417	-1082.2	0.417	-1087.7	0.417	-1088.8	0.417	-1100.4	0.417	-1120.6	0.417	-1128.4	0.417	-1139.4
0.418	-1138.3							0.836	-1058.2	0.418	-1072.6	0.418	-1075.4	0.418	-1081.4	0.418	-1082.2	0.418	-1087.4	0.418	-1089.1	0.418	-1100.4	0.418	-1118.7	0.418	-1128.2	0.418	-1138.3
0.419	-1138.5							0.838	-1057.8	0.419	-1072.4	0.419	-1075.6	0.419	-1081.5	0.419	-1082.4	0.419	-1088	0.419	-1089.2	0.419	-1099.2	0.419	-1119.1	0.419	-1128.5	0.419	-1138.5
0.42	-1138.1							0.84	-1058	0.42	-1071.6	0.42	-1075.8	0.42	-1080.9	0.42	-1082.4	0.42	-1087	0.42	-1088.7	0.42	-1098.9	0.42	-1118.4	0.42	-1127.8	0.42	-1138.1
0.421	-1137.1							0.842	-1057.6	0.421	-1072.1	0.421	-1075.9	0.421	-1081.2	0.421	-1082.8	0.421	-1087.4	0.421	-1088.5	0.421	-1099	0.421	-1118.5	0.421	-1127.4	0.421	-1137.1
0.422	-1136.8							0.844	-1056.9	0.422	-1071.3	0.422	-1075.6	0.422	-1081	0.422	-1082.9	0.422	-1087.7	0.422	-1088.9	0.422	-1098.9	0.422	-1118	0.422	-1127	0.422	-1136.8
0.423	-1137.3							0.846	-1056.6	0.423	-1071.2	0.423	-1075.7	0.423	-1081.6	0.423	-1083.2	0.423	-1087.7	0.423	-1088.7	0.423	-1099.4	0.423	-1118.2	0.423	-1127.2	0.423	-1137.3
0.424	-1136.4							0.848	-1057.2	0.424	-1070.8	0.424	-1075.8	0.424	-1081.6	0.424	-1082.8	0.424	-1087.3	0.424	-1088.7	0.424	-1099.5	0.424	-1116.6	0.424	-1126.8	0.424	-1136.4
0.425	-1135.8							0.85	-1057.4	0.425	-1071.4	0.425	-1075.7	0.425	-1081.5	0.425	-1082.8	0.425	-1087.6	0.425	-1088.5	0.425	-1099.1	0.425	-1116.6	0.425	-1126.7	0.425	-1135.8
0.426	-1135.6							0.852	-1057	0.426	-1070.9	0.426	-1076.2	0.426	-1081	0.426	-1082.8	0.426	-1087.1	0.426	-1089.1	0.426	-1099.3	0.426	-1116.1	0.426	-1126.1	0.426	-1135.6
0.427	-1134.9							0.854	-1057.2	0.427	-1071.3	0.427	-1076	0.427	-1081.2	0.427	-1083.1	0.427	-1087.2	0.427	-1088.9	0.427	-1099.5	0.427	-1115.8	0.427	-1125.8	0.427	-1134.9
0.428	-1134.6							0.856	-1057.3	0.428	-1071.5	0.428	-1075.7	0.428	-1080.3	0.428	-1083.3	0.428	-1087.2	0.428	-1088.6	0.428	-1099.3	0.428	-1114.7	0.428	-1124.9	0.428	-1134.6
0.429	-1134.4							0.858	-1057.4	0.429	-1071.7	0.429	-1076	0.429	-1080.5	0.429	-1084.3	0.429	-1087	0.429	-1088.9	0.429	-1099.5	0.429	-1114.7	0.429	-1124.9	0.429	-1134.4
0.43	-1134.4							0.86	-1057.8	0.43	-1071.2	0.43	-1076.4	0.43	-1080.1	0.43	-1084	0.43	-1087.6	0.43	-1089.3	0.43	-1098.8	0.43	-1114.2	0.43	-1124.6	0.43	-1134.4
0.431	-1133.2							0.862	-1058.5	0.431	-1071.5	0.431	-1076.6	0.431	-1080.8	0.431	-1084.6	0.431	-1087.4	0.431	-1088.7	0.431	-1098.7	0.431	-1114.8	0.431	-1124.2	0.431	-1133.2
0.432	-1132.9							0.864	-1057.8	0.432	-1071.6	0.432	-1076.8	0.432	-1080.5	0.432	-1084	0.432	-1087.6	0.432	-1089.3	0.432	-1099	0.432	-1114.6	0.432	-1124	0.432	-1132.9
0.433	-1131.7							0.866	-1057.7	0.433	-1072.1	0.433	-1076.9	0.433	-1079.9	0.433	-1084.4	0.433	-1087.8	0.433	-1089	0.433	-1099	0.433	-1114.1	0.433	-1124.6	0.433	-1131.7
0.434	-1132.5							0.868	-1058.4	0.434	-1070.6	0.434	-1076.3	0.434	-1079.7	0.434	-1083.8	0.434	-1087.4	0.434	-1089.3	0.434	-1099	0.434	-1112.4	0.434	-1124	0.434	-1132.5
0.435	-1131.9							0.87	-1057.9	0.435	-1070.1	0.435	-1076.6	0.435	-1080	0.435	-1083.9	0.435	-1087.4	0.435	-1089.2	0.435	-1099	0.435	-1112.9	0.435	-1124.2	0.435	-1131.9
0.436	-1131.7							0.872	-1057.7	0.436	-1069.6	0.436	-1076.8	0.436	-1079.4	0.436	-1084	0.436	-1087.8	0.436	-1089.9	0.436	-1099	0.436	-1112.3	0.436	-1123	0.436	-1131.7
0.437	-1130.8							0.874	-1057.9	0.437	-1069.3	0.437	-1078	0.437	-1079.5	0.437	-1083.9	0.437	-1087.7	0.437	-1089.9	0.437	-1099.4	0.437	-1112.4	0.437	-1122	0.437	-1130.8
0.438	-1130.6							0.876	-1057.2	0.438	-1069.5	0.438	-1076.9	0.438	-1079	0.438	-1083.4	0.438	-1088.1	0.438	-1089.1	0.438	-1099.2	0.438	-1111.2	0.438	-1121.5	0.438	-1130.6
0.439	-1129.2							0.878	-1057.9	0.439	-1069.2	0.439	-1075.9	0.439	-1079.2	0.439	-1084.3	0.439	-1088.1	0.439	-1088.9	0.439	-1099.6	0.439	-1111.7	0.439	-1121.5	0.439	-1129.2
0.44	-1129.1							0.88	-1057.9	0.44	-1068.6	0.44	-1075.3	0.44	-1078.9	0.44	-1082.6	0.44	-1088.3	0.44	-1089.3	0.44	-1099.3	0.44	-1110.7	0.44	-1120.8	0.44	-1129.1
0.441	-1129.6							0.882	-1058.3	0.441	-1068.3	0.441	-1076.2	0.441	-1079.5	0.441	-1083.3	0.441	-1088.3	0.441	-1089.3	0.441	-1099.5	0.441	-1110.3	0.441	-1120.5	0.441	-1129.6
0.442	-1128.9							0.884	-1057.4	0.442	-1068	0.442	-1075.1	0.442	-1079.4	0.442	-1083.8	0.442	-1087.7	0.442	-1089.4	0.442	-1099.7	0.442	-1110.7	0.442	-1120.1	0.442	-1128.9
0.443	-1128.7							0.886	-1057.8	0.443	-1068.7	0.443	-1074.9	0.443	-1079.3	0.443	-1083.8	0.443	-1088.8	0.443	-1088.4	0.443	-1099.3	0.443	-1109.8	0.443	-1119.7	0.443	-1128.7
0.444	-1127.7							0.888	-1057.6	0.444	-1067.8	0.444	-1074	0.444	-1079.2	0.444	-1083.1	0.444	-1087.4	0.444	-1089.2	0.444	-1098.9	0.444	-1109.8	0.444	-1119.7	0.444	-1127.7
0.445	-1127.4							0.89	-1058	0.445	-1066.9	0.445	-1074.4	0.445	-1079.4	0.445	-1083.5	0.445	-1087.9	0.445	-1088.8	0.445	-1098.9	0.445	-1108.5	0.445	-1119.3	0.445	-1127.4
0.446	-1127.7							0.892	-1057.7	0.446	-1066.5	0.446	-1073.4	0.446	-1078.6	0.446	-1083.5	0.446	-1087.5	0.446	-1089.3	0.446	-1099	0.446	-1108	0.446	-1117.5	0.446	-1127.7
0.447	-1127.3							0.894	-1058.3	0.447	-1066.8	0.447	-1073.4	0.447	-1078.9	0.447	-1083.5	0.447	-1087.3	0.447	-1089.2	0.447	-1098.2	0.447	-1107.7	0.447	-1118.2	0.447	-1127.3
0.448	-1126.7							0.896	-1058.5	0.448	-1066.6	0.448	-1073.3	0.448	-1078.9	0.448	-1083.3	0.448	-1087.6	0.448	-1089.4	0.448	-1098.6	0.448	-1107.7	0.448	-1117.3	0.448	-1126.7
0.449	-1125.5							0.898	-1057.8	0.449	-1066.4	0.449	-1073.8	0.449	-1079	0.449	-1083.3	0.449	-1087.6	0.449	-1089.3	0.449	-1098.4	0.449	-1107.9	0.449	-1117.3	0.449	-1125.5
0.45	-1125.8							0.9	-1057.7	0.45	-1066.5	0.45	-1073.4	0.45	-1079.3	0.45	-1083.2	0.45	-1086.4	0.45	-1089.7	0.45	-1097.8	0.45	-1108.1	0.45	-1116.5	0.45	-1125.8
0.451	-1125.5							0.902	-1057.1	0.451	-1065.6	0.451	-1073	0.451	-1079.4	0.451	-1083.7	0.451	-1086.7	0.451	-1089.4	0.451	-1097.9	0.451	-1108.2	0.451	-1116.4	0.451	-1125.5
0.452	-1123.3							0.904	-1057.5	0.452	-1065.3	0.452	-1073.4	0.452	-1079.5	0.452	-1083.1	0.452	-1086.6	0.452	-1089.6	0.452	-1097.6	0.452	-1107.4	0.452	-1115.7	0.452	-1123.3
0.453	-1124.7							0.906	-1057.3	0.453	-1065.5	0.453	-1073	0.453	-1079.5	0.453	-1083.4	0.453	-1087.4	0.453	-1089.8	0.453	-1097.4	0.453	-1107.2	0.453	-1115.7	0.453	-1124.7
0.454	-1123.6							0.908	-1057.4	0.454	-1065.1	0.454	-1073.3	0.454	-1079.1	0.454	-1082.4	0.454	-1086.4	0.454	-1089.6	0.454	-1097.2	0.454	-1106.6	0.454	-1114.4	0.454	-1123.6
0.455	-1124							0.91	-1057.9	0.455	-1065.1	0.455	-1073.5	0.455	-1079	0.455	-1081.8	0.455	-1086.6	0.455	-1089.7	0.455	-1096.8	0.455	-1106.3	0.455	-1114.4	0.455	-1124
0.456	-1123.5							0.912	-1058.3	0.456	-1064.6	0.456	-1073.7	0.456	-1078.2	0.456	-1081.7	0.456	-1086.3	0.456	-1090.2	0.456	-1096.8	0.456	-1106	0.456	-1114.4	0.456	-1123.5
0.457	-1123							0.914	-1058.3	0.457	-1064.6	0.457	-1073.4	0.457	-1078.7	0.457	-1082.2	0.457	-1087.1	0.457	-1089.6	0.457	-1097.1	0.457	-1105.3	0.457	-1113.6	0.457	-1123
0.458	-1122.7							0.916	-1058	0.458	-1064.5	0.458	-1072.5	0.458	-1078.3	0.458	-1080.9	0.458	-1087.2	0.458	-1090	0.458	-1096.5	0.458	-1105	0.458	-1113.3	0.458	-1122.7
0.459	-1123							0.918	-1058.1	0.459	-1064.7	0.459	-1073.2	0.459	-1079.2	0.459	-1081.2	0.459	-1087.8	0.459	-1090	0.459	-1096.4	0.459	-1104.8	0.459	-1113.3	0.459	-1123
0.46	-1121.9							0.92	-1057.9	0.46	-1064.8	0.46	-1073.6	0.46	-1077.9	0.46	-1080.5	0.46	-1087.6	0.46	-1090.6	0.46	-1096.2	0.46	-1104.7	0.46	-1112.8	0.46	-1121.9
0.461	-1122.1							0.922	-1058.3	0.461	-1065	0.461	-1073.7	0.461	-1078.8	0.461	-1081.5	0.461	-1087.2	0.461	-1090.1	0.461	-1096.5	0.461	-1105.8	0.461	-1112.3	0.461	-1122.1
0.462	-1120.3							0.924	-1058.2	0.462	-1064.3	0.462	-1073.1	0.462	-1077.8	0.462	-1081.3	0.462	-1086.5	0.462	-1090.1	0.462	-1095.5	0.462	-1105.2	0.462	-1111.3	0.462	-1120.3
0.463	-1120.9							0.926	-1058	0.463	-1064.5	0.463	-1073.4	0.463	-1078.2	0.463	-1080.7	0.463	-1086.8	0.463	-1090.4	0.463	-1096.7	0.463	-1104.8	0.463	-1111.5	0.463	-1120.9
0.464	-1120.1							0.928	-1058	0.464	-1063.5	0.464	-1072.6	0.464	-1077.4	0.464	-1080.4	0.464	-1087.2	0.464	-1091	0.464	-1095.9	0.464	-1104.5	0.464	-1110.6	0.464	-1120.1
0.465	-1119.7							0.93	-1057.6	0.465	-1064	0.465	-1072.5	0.465	-1077.7	0.465	-1081	0.465	-1087	0.465	-1089.9	0.465	-1096.1	0.465	-1104.8	0.465	-1110.8	0.465	-1119.7
0.466	-1119							0.932	-1057.9	0.466	-1063.3	0.466	-1071.8	0.466	-1077.1	0.466	-1080.3	0.466	-1087	0.466	-1089.6	0.466	-1095.9	0.466	-1104	0.466	-1110.7	0.466	-1119
0.467	-1119.2							0.934	-1057.5	0.467	-1064.2	0.467	-1072.5	0.467	-1077.1	0.467	-1080.7	0.467	-1086.9	0.467	-1089.3	0.467	-1096.4	0.467	-1104.3	0.467	-1110.8	0.467	-1119.2
0.468	-1118.7							0.936	-1057.4	0.468	-1063.3	0.468	-1071.8	0.468	-1076.3	0.468	-1079.9	0.468	-1086.9	0.468	-1089.8	0.468	-1097.1	0.468	-1103.8	0.468	-1110.5	0.468	-1118.7
0.469	-1118							0.938	-1057.5	0.469	-1064.2	0.469	-1072.1	0.469	-1076.6	0.469	-1080.7	0.469	-1087	0.469	-1089.1	0.469	-1097.4	0.469	-1103.7	0.469	-1110.2	0.469	-1118
0.47	-1116.5							0.94	-1057.4	0.47	-1064.1	0.47	-1071.8	0.47	-1076	0.47	-1080.1	0.47	-1086.8	0.47	-1089.5	0.47	-1096.9	0.47	-1103.7	0.47	-1109.7	0.47	-1116.5
0.471	-1116.4							0.942	-1057.9	0.471	-1065	0.471	-1071.8	0.471	-1076.2	0.471	-1080.4	0.471	-1086.7	0.471	-1088.5	0.471	-1095.2	0.471	-1104.3	0.471	-1109.5	0.471	-1116.4
0.472	-1114.5							0.944	-1057.6	0.472	-1064.8	0.472	-1070.7	0.472	-1076.2	0.472	-1080.2	0.472	-1087.1	0.472	-1088.9	0.472	-1093.9	0.472	-1103.8	0.472	-1108.8	0.472	-1114.5
0.473	-1113.6							0.946	-1057.8	0.473	-1065.4	0.473	-1071	0.473	-1076.1	0.473	-1080.2	0.473	-1086.6	0.473	-1088.9	0.473	-1094.7	0.473	-1104	0.473	-1108.8	0.473	-1113.6
0.474	-1113.1							0.948	-1057.5	0.474	-1065.8	0.474	-1070.6	0.474	-1075.8	0.474	-1080.1	0.474	-1086.7	0.474	-1089.1	0.474	-1094.7	0.474	-1101.7	0.474	-1108	0.474	-1113.1
0.475	-1112.2							0.95	-1057.6	0.475	-1065.4	0.475	-1070	0.475	-1075.7	0.475	-1079.9	0.475	-1086.7	0.475	-1088.5	0.475	-1094.1	0.475	-1100.7	0.475	-1106.9	0.475	-1112.2
0.476	-1111.9							0.952	-1057.7	0.476	-1064	0.476	-1069.6	0.476	-1075	0.476	-1079.5	0.476	-1086.3	0.476	-1089.1	0.476	-1094.4	0.476	-1100.6	0.476	-1107.1	0.476	-1111.9
0.477	-1111.2							0.954	-1057.9	0.477	-1063.7	0.477	-1069.9	0.477	-1075.2	0.477	-1079.4	0.477	-1086.6	0.477	-1089.1	0.477	-1094.9	0.477	-1100.3	0.477	-1106.3	0.477	-1111.2
0.478	-1110.9							0.956	-1058.2	0.478	-1063.5	0.478	-1069	0.478	-1074.6	0.478	-1078.7	0.478	-1083.2	0.478	-1089.4	0.478	-1094.8	0.478	-1100.5	0.478	-1106	0.478	-1110.9
0.479	-1111.1							0.958	-1057.6	0.479	-1062.7	0.479	-1068.6	0.479	-1074.3	0.479	-1078.8	0.479	-1083	0.479	-1088.5	0.479	-1094.9	0.479	-1099.7	0.479	-1104.6	0.479	-1111.1
0.48	-1110.1							0.96	-1058.5	0.48	-1063.3	0.48	-1068.1	0.48	-1073.9	0.48	-1078.8	0.48	-1084	0.48	-1088.8	0.48	-1094.3	0.48	-1099.2	0.48	-1103.9	0.48	-1110.1
0.481	-1109.8							0.962	-1058.4	0.481	-1064.2	0.481	-1068.5	0.481	-1074.4	0.481	-1078.6	0.481	-1084.6	0.481	-1088.3	0.481	-1094.9	0.481	-1099.4	0.481	-1104.4	0.481	-1109.8
0.482	-1109.4							0.964	-1059.2	0.482	-1063.7	0.482	-1068.3	0.482	-1074	0.482	-1077.8	0.482	-1084.6	0.482	-1088.7	0.482	-1094.3	0.482	-1099.4	0.482	-1102.5	0.482	-1109.4
0.483	-1108.9							0.966	-1058.3	0.483	-1063.3	0.483	-1068.1	0.483	-1074.4	0.483	-1078.5	0.483	-1085	0.483	-1088.5	0.483	-1094.5	0.483	-1098.9	0.483	-1102.5	0.483	-1108.9
0.484	-1108.5							0.968	-1059	0.484	-1063.4	0.484	-1067.7	0.484	-1072.8	0.484	-1077.3	0.484	-1084.4	0.484	-1088.9	0.484	-1094	0.484	-1099	0.484	-1101.6	0.484	-1108.5
0.485	-1108.2							0.97	-1057.9	0.485	-1063.2	0.485	-1067.5	0.485	-1072.7	0.485	-1076.9	0.485	-1084.5	0.485	-1088.3	0.485	-1094.1	0.485	-1097.5	0.485	-1101.1	0.485	-1108.2
0.486	-1108.8							0.972	-1057.9	0.486	-1062.5	0.486	-1067.2	0.486	-1072.6	0.486	-1076.6	0.486	-1084.8	0.486	-1088.4	0.486	-1094.1	0.486	-1097.7	0.486	-1101.4	0.486	-1108.8
0.487	-1106.5							0.974	-1058.3	0.487	-1063	0.487	-1066.8	0.487	-1072.2	0.487	-1076.8	0.487	-1084.3	0.487	-1088.3	0.487	-1094.6	0.487	-1097.2	0.487	-1101.9	0.487	-1106.5
0.488	-1106.3							0.976	-1058.3	0.488	-1062.7	0.488	-1066.5	0.488	-1072	0.488	-1076.1	0.488	-1084	0.488	-1088.4	0.488	-1094.3	0.488	-1097.4	0.488	-1101.7	0.488	-1106.3
0.489	-1105.3							0.978	-1058.7	0.489	-1063	0.489	-1066.8	0.489	-1072.4	0.489	-1075.6	0.489	-1083.7	0.489	-1088.1	0.489	-1094.4	0.489	-1098.5	0.489	-1101.7	0.489	-1105.3
0.49	-1105.8							0.98	-1059.2	0.49	-1062.9	0.49	-1066.1	0.49	-1071.8	0.49	-1075.3	0.49	-1083.3	0.49	-1088.8	0.49	-1094.3	0.49	-1098	0.49	-1102.2	0.49	-1105.8
0.491	-1105							0.982	-1059.5	0.491	-1062.8	0.491	-1066.8	0.491	-1071.7	0.491	-1075.3	0.491	-1083.3	0.491	-1088	0.491	-1094.5	0.491	-1097.7	0.491	-1101.6	0.491	-1105
0.492	-1104.8							0.984	-1058.5	0.492	-1062.2	0.492	-1066.3	0.492	-1071.5	0.492	-1075.1	0.492	-1082.2	0.492	-1088	0.492	-1094	0.492	-1097.5	0.492	-1099.7	0.492	-1104.8
0.493	-1104.4							0.986	-1059.3	0.493	-1062.5	0.493	-1066.3	0.493	-1071.3	0.493	-1075.3	0.493	-1082.8	0.493	-1087.9	0.493	-1094	0.493	-1098.2	0.493	-1099.4	0.493	-1104.4
0.494	-1104.6							0.988	-1059.3	0.494	-1062.1	0.494	-1066	0.494	-1070.1	0.494	-1075	0.494	-1082.1	0.494	-1088.1	0.494	-1093.7	0.494	-1097.1	0.494	-1100	0.494	-1104.6
0.495	-1103.7							0.99	-1057.5	0.495	-1062	0.495	-1066	0.495	-1070.9	0.495	-1075.2	0.495	-1082.6	0.495	-1088.1	0.495	-1094	0.495	-1097.4	0.495	-1098.6	0.495	-1103.7
0.496	-1104.2							0.992	-1057.9	0.496	-1062	0.496	-1065.8	0.496	-1070.5	0.496	-1075.5	0.496	-1081.6	0.496	-1088.1	0.496	-1093.1	0.496	-1097.2	0.496	-1097	0.496	-1104.2
0.497	-1103.9							0.994	-1057.9	0.497	-1062.2	0.497	-1065.9	0.497	-1070.5	0.497	-1075.5	0.497	-1082.2	0.497	-1087.9	0.497	-1093.5	0.497	-1097.2	0.497	-1096.7	0.497	-1103.9
0.498	-1103.4							0.996	-1057.7	0.498	-1062	0.498	-1065.4	0.498	-1070.2	0.498	-1074.9	0.498	-1081.9	0.498	-1088.2	0.498	-1093	0.498	-1097	0.498	-1096.6	0.498	-1103.4
0.499	-1103.7							0.998	-1057.5	0.499	-1062.6	0.499	-1065.9	0.499	-1069.5	0.499	-1075.3	0.499	-1081.9	0.499	-1087	0.499	-1093.4	0.499	-1097.2	0.499	-1095.9	0.499	-1103.7
0.5	-1102.6							1	-1057.6	0.5	-1062.3	0.5	-1065.3	0.5	-1069.4	0.5	-1074.2	0.5	-1082.1	0.5	-1087.7	0.5	-1092.6	0.5	-1096.5	0.5	-1096.4	0.5	-1102.6
0.501	-1103.2							1.002	-1057.2	0.501	-1061.9	0.501	-1065.3	0.501	-1069.6	0.501	-1074.8	0.501	-1080.9	0.501	-1087.9	0.501	-1093	0.501	-1096.8	0.501	-1096.3	0.501	-1103.2
0.502	-1103.5							1.004	-1057.2	0.502	-1063.3	0.502	-1065.1	0.502	-1069.6	0.502	-1074.8	0.502	-1080.7	0.502	-1088.9	0.502	-1092.4	0.502	-1095.9	0.502	-1095.9	0.502	-1103.5
0.503	-1102.1							1.006	-1056.9	0.503	-1062.7	0.503	-1065	0.503	-1069.7	0.503	-1075	0.503	-1080.7	0.503	-1088.1	0.503	-1092	0.503	-1096.4	0.503	-1095.6	0.503	-1102.1
0.504	-1102							1.008	-1056.5	0.504	-1062.4	0.504	-1063.9	0.504	-1069.5	0.504	-1074.6	0.504	-1081.5	0.504	-1088.5	0.504	-1092	0.504	-1096.3	0.504	-1095.5	0.504	-1102
0.505	-1102.4							1.01	-1056.3	0.505	-1062.5	0.505	-1064.6	0.505	-1069.5	0.505	-1074.1	0.505	-1082.6	0.505	-1088.8	0.505	-1091.6	0.505	-1096.5	0.505	-1095.5	0.505	-1102.4
0.506	-1101.9							1.012	-1056.3	0.506	-1062.2	0.506	-1063.6	0.506	-1069.3	0.506	-1072.4	0.506	-1082	0.506	-1089.4	0.506	-1091.4	0.506	-1096.3	0.506	-1095	0.506	-1101.9
0.507	-1101.9							1.014	-1057.1	0.507	-1062.2	0.507	-1063.9	0.507	-1069.3	0.507	-1072.7	0.507	-1082.7	0.507	-1089	0.507	-1091.9	0.507	-1096.3	0.507	-1094.9	0.507	-1101.9
0.508	-1101.1							1.016	-1056.5	0.508	-1061.7	0.508	-1064	0.508	-1068.5	0.508	-1073.1	0.508	-1082	0.508	-1090	0.508	-1092.1	0.508	-1096.3	0.508	-1094.3	0.508	-1101.1
0.509	-1102							1.018	-1057.2	0.509	-1061.8	0.509	-1064.2	0.509	-1069.4	0.509	-1073.9	0.509	-1082.4	0.509	-1089.2	0.509	-1093.1	0.509	-1097.1	0.509	-1094.2	0.509	-1102
0.51	-1101.4							1.02	-1057.9	0.51	-1061.1	0.51	-1063.8	0.51	-1067.3	0.51	-1073.9	0.51	-1082.5	0.51	-1090	0.51	-1092.2	0.51	-1096.5	0.51	-1093.9	0.51	-1101.4
0.511	-1101.6							1.022	-1059.2	0.511	-1061.2	0.511	-1063.7	0.511	-1067.9	0.511	-1074.3	0.511	-1081.8	0.511	-1089.5	0.511	-1092.4	0.511	-1097	0.511	-1093.9	0.511	-1101.6
0.512	-1101							1.024	-1056.9	0.512	-1061.4	0.512	-1062.9	0.512	-1067.2	0.512	-1073.8	0.512	-1080.7	0.512	-1090.6	0.512	-1092.5	0.512	-1096.6	0.512	-1093.6	0.512	-1101
0.513	-1101							1.026	-1056.3	0.513	-1061.1	0.513	-1063.5	0.513	-1067.6	0.513	-1073.4	0.513	-1079.9	0.513	-1091	0.513	-1093	0.513	-1096.3	0.513	-1094.2	0.513	-1101
0.514	-1100.6							1.028	-1056.1	0.514	-1061.1	0.514	-1063.3	0.514	-1067.3	0.514	-1072.8	0.514	-1080.2	0.514	-1090.9	0.514	-1093.3	0.514	-1095.1	0.514	-1093.4	0.514	-1100.6
0.515	-1100.9							1.03	-1056	0.515	-1061.1	0.515	-1062.9	0.515	-1067.3	0.515	-1073.3	0.515	-1081.5	0.515	-1090.8	0.515	-1093.5	0.515	-1095.5	0.515	-1093.5	0.515	-1100.9
0.516	-1100.6							1.032	-1056.8	0.516	-1061.2	0.516	-1063	0.516	-1067	0.516	-1073.1	0.516	-1081	0.516	-1090.7	0.516	-1092.5	0.516	-1095.4	0.516	-1093.8	0.516	-1100.6
0.517	-1100.6							1.034	-1056.4	0.517	-1061	0.517	-1063	0.517	-1067.5	0.517	-1073.4	0.517	-1081.4	0.517	-1090.3	0.517	-1093.7	0.517	-1095.3	0.517	-1093.3	0.517	-1100.6
0.518	-1100.1							1.036	-1056.7	0.518	-1061.5	0.518	-1062.2	0.518	-1067	0.518	-1073	0.518	-1080.3	0.518	-1089.6	0.518	-1093.6	0.518	-1095.2	0.518	-1093	0.518	-1100.1
0.519	-1100.3							1.038	-1057.9	0.519	-1061.3	0.519	-1062.8	0.519	-1067	0.519	-1073	0.519	-1079.8	0.519	-1089.4	0.519	-1094.2	0.519	-1094.6	0.519	-1092.8	0.519	-1100.3
0.52	-1098.5							1.04	-1058.5	0.52	-1061.9	0.52	-1062.5	0.52	-1067.1	0.52	-1073.1	0.52	-1079.6	0.52	-1088.9	0.52	-1093.5	0.52	-1093.2	0.52	-1092.9	0.52	-1098.5
0.521	-1099.8							1.042	-1057.7	0.521	-1061.9	0.521	-1062.9	0.521	-1067.8	0.521	-1073	0.521	-1080.3	0.521	-1088.3	0.521	-1093.2	0.521	-1093.6	0.521	-1092.7	0.521	-1099.8
0.522	-1099							1.044	-1058	0.522	-1061.8	0.522	-1062.7	0.522	-1067.2	0.522	-1072.8	0.522	-1079.9	0.522	-1086.7	0.522	-1092.9	0.522	-1093.1	0.522	-1092.5	0.522	-1099
0.523	-1099.7							1.046	-1057.4	0.523	-1062.1	0.523	-1063.1	0.523	-1067.6	0.523	-1072.5	0.523	-1079.3	0.523	-1086	0.523	-1092.9	0.523	-1093.6	0.523	-1092.8	0.523	-1099.7
0.524	-1098.9							1.048	-1057.4	0.524	-1061.7	0.524	-1062.8	0.524	-1067	0.524	-1072.3	0.524	-1079.3	0.524	-1086.2	0.524	-1092.8	0.524	-1093.3	0.524	-1092.6	0.524	-1098.9
0.525	-1099.5							1.05	-1057.5	0.525	-1061.8	0.525	-1063.5	0.525	-1067.3	0.525	-1072.2	0.525	-1079.7	0.525	-1085.2	0.525	-1092.6	0.525	-1093.5	0.525	-1093.1	0.525	-1099.5
0.526	-1098.1							1.052	-1058	0.526	-1061.4	0.526	-1063.2	0.526	-1067.2	0.526	-1072.1	0.526	-1079.1	0.526	-1085	0.526	-1092.3	0.526	-1093.2	0.526	-1092.7	0.526	-1098.1
0.527	-1098.4							1.054	-1057.7	0.527	-1061.6	0.527	-1063.1	0.527	-1067.2	0.527	-1071.6	0.527	-1079.2	0.527	-1084.8	0.527	-1092.5	0.527	-1093.6	0.527	-1093.4	0.527	-1098.4
0.528	-1098.7							1.056	-1058	0.528	-1061.8	0.528	-1062.5	0.528	-1067.4	0.528	-1070.8	0.528	-1079.5	0.528	-1084.8	0.528	-1091.7	0.528	-1093.1	0.528	-1093.9	0.528	-1098.7
0.529	-1098.8							1.058	-1058.8	0.529	-1061.7	0.529	-1063.8	0.529	-1067.7	0.529	-1071.5	0.529	-1079.5	0.529	-1084.6	0.529	-1092	0.529	-1093	0.529	-1094.5	0.529	-1098.8
0.53	-1098.5							1.06	-1058.2	0.53	-1061.3	0.53	-1062.7	0.53	-1067.1	0.53	-1071.7	0.53	-1078.2	0.53	-1084.1	0.53	-1091.5	0.53	-1093.4	0.53	-1094.5	0.53	-1098.5
0.531	-1099							1.062	-1058.1	0.531	-1061.9	0.531	-1063.4	0.531	-1067	0.531	-1071.1	0.531	-1079.2	0.531	-1082.6	0.531	-1091.3	0.531	-1093.2	0.531	-1094.9	0.531	-1099
0.532	-1099.5							1.064	-1058.6	0.532	-1062.1	0.532	-1062.8	0.532	-1066.7	0.532	-1070.9	0.532	-1078.6	0.532	-1083.2	0.532	-1091.1	0.532	-1092.9	0.532	-1094.5	0.532	-1099.5
0.533	-1099.3							1.066	-1057.5	0.533	-1062.3	0.533	-1063.2	0.533	-1067.3	0.533	-1071.2	0.533	-1078	0.533	-1082.4	0.533	-1090.8	0.533	-1092.8	0.533	-1095.1	0.533	-1099.3
0.534	-1098.5							1.068	-1057.5	0.534	-1062.6	0.534	-1062.9	0.534	-1066.9	0.534	-1070.2	0.534	-1077.3	0.534	-1082.6	0.534	-1091	0.534	-1093	0.534	-1094.6	0.534	-1098.5
0.535	-1099.4							1.07	-1057.2	0.535	-1062.9	0.535	-1062.7	0.535	-1066.8	0.535	-1070.7	0.535	-1077.7	0.535	-1082.5	0.535	-1091.1	0.535	-1093.7	0.535	-1095.2	0.535	-1099.4
0.536	-1098.8							1.072	-1057.9	0.536	-1062.8	0.536	-1062.7	0.536	-1066.9	0.536	-1070.4	0.536	-1077	0.536	-1081.6	0.536	-1090.7	0.536	-1093.4	0.536	-1094.2	0.536	-1098.8
0.537	-1096.9							1.074	-1058.2	0.537	-1062.6	0.537	-1063.3	0.537	-1067.4	0.537	-1070.6	0.537	-1077	0.537	-1081.5	0.537	-1090.4	0.537	-1093.7	0.537	-1094.7	0.537	-1096.9
0.538	-1096.8							1.076	-1058.7	0.538	-1062.2	0.538	-1063.1	0.538	-1067.5	0.538	-1070.2	0.538	-1076.6	0.538	-1081	0.538	-1090	0.538	-1093.7	0.538	-1094.2	0.538	-1096.8
0.539	-1096.7							1.078	-1059.1	0.539	-1062.6	0.539	-1063.8	0.539	-1067.4	0.539	-1070.6	0.539	-1076.2	0.539	-1080.6	0.539	-1090.4	0.539	-1093.2	0.539	-1094.6	0.539	-1096.7
0.54	-1097							1.08	-1059.1	0.54	-1062.4	0.54	-1062.7	0.54	-1066.4	0.54	-1070	0.54	-1076.4	0.54	-1081.5	0.54	-1090.5	0.54	-1093.6	0.54	-1093.8	0.54	-1097
0.541	-1096.3							1.082	-1059.2	0.541	-1062.3	0.541	-1063.3	0.541	-1067.4	0.541	-1070.2	0.541	-1076	0.541	-1081.2	0.541	-1091.2	0.541	-1093.7	0.541	-1094.3	0.541	-1096.3
0.542	-1096.9							1.084	-1058.7	0.542	-1061.9	0.542	-1062.8	0.542	-1067	0.542	-1070.1	0.542	-1075.5	0.542	-1081.4	0.542	-1091.1	0.542	-1094.1	0.542	-1093.9	0.542	-1096.9
0.543	-1095.3							1.086	-1058.6	0.543	-1062.3	0.543	-1063.2	0.543	-1067.3	0.543	-1070.2	0.543	-1075.2	0.543	-1081.5	0.543	-1092.6	0.543	-1094.1	0.543	-1093.9	0.543	-1095.3
0.544	-1095.8							1.088	-1058.7	0.544	-1062.3	0.544	-1063	0.544	-1067	0.544	-1070.7	0.544	-1075.3	0.544	-1081.4	0.544	-1092	0.544	-1094.1	0.544	-1093.7	0.544	-1095.8
0.545	-1095.9							1.09	-1059.2	0.545	-1061.9	0.545	-1063.8	0.545	-1067.6	0.545	-1070.7	0.545	-1075.8	0.545	-1081.4	0.545	-1092.8	0.545	-1092.4	0.545	-1094	0.545	-1095.9
0.546	-1095.4							1.092	-1057.9	0.546	-1061.8	0.546	-1063.3	0.546	-1067.4	0.546	-1069.6	0.546	-1075.9	0.546	-1081.3	0.546	-1091.7	0.546	-1092.6	0.546	-1093.8	0.546	-1095.4
0.547	-1095.7							1.094	-1057.6	0.547	-1062.4	0.547	-1063.9	0.547	-1068.6	0.547	-1068.2	0.547	-1076.1	0.547	-1081.3	0.547	-1091.6	0.547	-1093.5	0.547	-1093.7	0.547	-1095.7
0.548	-1095.7							1.096	-1057.1	0.548	-1062.2	0.548	-1063.2	0.548	-1068.6	0.548	-1068.1	0.548	-1076.5	0.548	-1080.9	0.548	-1090.9	0.548	-1092.8	0.548	-1093.9	0.548	-1095.7
0.549	-1095.9							1.098	-1056.9	0.549	-1062.6	0.549	-1063.9	0.549	-1068.6	0.549	-1067.8	0.549	-1077.7	0.549	-1080.4	0.549	-1091.8	0.549	-1093.5	0.549	-1094.4	0.549	-1095.9
0.55	-1095.2							1.1	-1056.3	0.55	-1061.5	0.55	-1063.1	0.55	-1067.1	0.55	-1067.5	0.55	-1075.4	0.55	-1080.2	0.55	-1090.1	0.55	-1092.8	0.55	-1093.9	0.55	-1095.2
0.551	-1095.8							1.102	-1056.7	0.551	-1062.8	0.551	-1064.3	0.551	-1067.3	0.551	-1068.1	0.551	-1075.8	0.551	-1080.3	0.551	-1091	0.551	-1092.8	0.551	-1094.6	0.551	-1095.8
0.552	-1096							1.104	-1056.5	0.552	-1063.2	0.552	-1063.6	0.552	-1067.1	0.552	-1068.6	0.552	-1076.4	0.552	-1080.1	0.552	-1090.5	0.552	-1092.3	0.552	-1094.2	0.552	-1096
0.553	-1096							1.106	-1056.7	0.553	-1063.8	0.553	-1064.3	0.553	-1067.5	0.553	-1068.2	0.553	-1074.3	0.553	-1079.8	0.553	-1090.6	0.553	-1092.3	0.553	-1094.6	0.553	-1096
0.554	-1096.5							1.108	-1057.4	0.554	-1062.8	0.554	-1063.9	0.554	-1067.6	0.554	-1068.4	0.554	-1074	0.554	-1079.6	0.554	-1090.7	0.554	-1091.7	0.554	-1094.8	0.554	-1096.5
0.555	-1096.8							1.11	-1057	0.555	-1064.3	0.555	-1065.1	0.555	-1067.7	0.555	-1068.5	0.555	-1074.2	0.555	-1079.3	0.555	-1090.1	0.555	-1092	0.555	-1094.9	0.555	-1096.8
0.556	-1096.2							1.112	-1057.2	0.556	-1062.7	0.556	-1065.3	0.556	-1067.9	0.556	-1068.2	0.556	-1073.3	0.556	-1078.9	0.556	-1088.8	0.556	-1091.5	0.556	-1094.7	0.556	-1096.2
0.557	-1096.4							1.114	-1057.1	0.557	-1063	0.557	-1065.1	0.557	-1068.4	0.557	-1068.8	0.557	-1073.6	0.557	-1079.1	0.557	-1088.6	0.557	-1091.4	0.557	-1094.6	0.557	-1096.4
0.558	-1096.5							1.116	-1057.4	0.558	-1062.3	0.558	-1063.8	0.558	-1067.5	0.558	-1068.3	0.558	-1073.1	0.558	-1079	0.558	-1088.8	0.558	-1091.6	0.558	-1094.2	0.558	-1096.5
0.559	-1096.8							1.118	-1057.2	0.559	-1062.8	0.559	-1064.8	0.559	-1067.8	0.559	-1068.6	0.559	-1072.9	0.559	-1078.5	0.559	-1088	0.559	-1091.6	0.559	-1094.7	0.559	-1096.8
0.56	-1097							1.12	-1056.9	0.56	-1062.8	0.56	-1064.4	0.56	-1067.6	0.56	-1068.3	0.56	-1073.3	0.56	-1079.2	0.56	-1088.1	0.56	-1091.1	0.56	-1094.7	0.56	-1097
0.561	-1096.9							1.122	-1056.9	0.561	-1063.1	0.561	-1064.9	0.561	-1068.1	0.561	-1068.8	0.561	-1072.5	0.561	-1079	0.561	-1088.5	0.561	-1091.4	0.561	-1094.4	0.561	-1096.9
0.562	-1096.3							1.124	-1057	0.562	-1064	0.562	-1064.3	0.562	-1068.1	0.562	-1068.7	0.562	-1072.4	0.562	-1079.3	0.562	-1087.5	0.562	-1090.4	0.562	-1094.1	0.562	-1096.3
0.563	-1096.9							1.126	-1057.1	0.563	-1064.4	0.563	-1065.1	0.563	-1068.4	0.563	-1069.8	0.563	-1071.8	0.563	-1079.7	0.563	-1087.4	0.563	-1091.3	0.563	-1094.3	0.563	-1096.9
0.564	-1096.9							1.128	-1057	0.564	-1063.4	0.564	-1065.1	0.564	-1068.4	0.564	-1068.8	0.564	-1071.2	0.564	-1080.2	0.564	-1086.7	0.564	-1091.3	0.564	-1093.7	0.564	-1096.9
0.565	-1096.6							1.13	-1057.7	0.565	-1063.7	0.565	-1065.7	0.565	-1068.5	0.565	-1069.7	0.565	-1071.5	0.565	-1080	0.565	-1087.5	0.565	-1091.7	0.565	-1094.1	0.565	-1096.6
0.566	-1096.1							1.132	-1057.7	0.566	-1063.5	0.566	-1065	0.566	-1068.4	0.566	-1068.9	0.566	-1071.1	0.566	-1079	0.566	-1086.8	0.566	-1091	0.566	-1094.1	0.566	-1096.1
0.567	-1096.5							1.134	-1058	0.567	-1064	0.567	-1065.6	0.567	-1068.2	0.567	-1070	0.567	-1071.4	0.567	-1078.4	0.567	-1086.2	0.567	-1091	0.567	-1093.8	0.567	-1096.5
0.568	-1095.5							1.136	-1057.9	0.568	-1064.1	0.568	-1065.6	0.568	-1068.5	0.568	-1069.1	0.568	-1071.1	0.568	-1079	0.568	-1085.7	0.568	-1089.8	0.568	-1093.6	0.568	-1095.5
0.569	-1096							1.138	-1057.5	0.569	-1064.1	0.569	-1065.9	0.569	-1068.6	0.569	-1069.7	0.569	-1071.9	0.569	-1078.9	0.569	-1086.7	0.569	-1090.5	0.569	-1094.5	0.569	-1096
0.57	-1095.7							1.14	-1057.6	0.57	-1064.9	0.57	-1065.2	0.57	-1069.1	0.57	-1068.9	0.57	-1072.3	0.57	-1079	0.57	-1086.8	0.57	-1090.1	0.57	-1092.6	0.57	-1095.7
0.571	-1095.9							1.142	-1057.1	0.571	-1064.7	0.571	-1065.8	0.571	-1068.6	0.571	-1069.5	0.571	-1070.6	0.571	-1077.5	0.571	-1087.2	0.571	-1089.5	0.571	-1092.7	0.571	-1095.9
0.572	-1096.4							1.144	-1057	0.572	-1065	0.572	-1065.9	0.572	-1068.4	0.572	-1069.7	0.572	-1071.1	0.572	-1076.9	0.572	-1087	0.572	-1089.6	0.572	-1092.5	0.572	-1096.4
0.573	-1095.4							1.146	-1057.1	0.573	-1064.3	0.573	-1066.1	0.573	-1068.9	0.573	-1070	0.573	-1070.7	0.573	-1076.8	0.573	-1087.4	0.573	-1089.1	0.573	-1092.1	0.573	-1095.4
0.574	-1095.2							1.148	-1057.2	0.574	-1064.3	0.574	-1065.9	0.574	-1068.6	0.574	-1070.2	0.574	-1071.7	0.574	-1075.9	0.574	-1086.8	0.574	-1089.3	0.574	-1092	0.574	-1095.2
0.575	-1095.3							1.15	-1057.3	0.575	-1064.6	0.575	-1066.2	0.575	-1069	0.575	-1070.2	0.575	-1072.6	0.575	-1075	0.575	-1086.7	0.575	-1088.9	0.575	-1091.3	0.575	-1095.3
0.576	-1095.3							1.152	-1056.8	0.576	-1064.3	0.576	-1065.6	0.576	-1068.9	0.576	-1070	0.576	-1072.7	0.576	-1075.3	0.576	-1087.1	0.576	-1088.3	0.576	-1090.4	0.576	-1095.3
0.577	-1094.8							1.154	-1056.8	0.577	-1064.1	0.577	-1065.9	0.577	-1069.2	0.577	-1070.5	0.577	-1072.8	0.577	-1075.2	0.577	-1086.5	0.577	-1088.9	0.577	-1091.1	0.577	-1094.8
0.578	-1095.3							1.156	-1057.1	0.578	-1062.8	0.578	-1065.9	0.578	-1069.3	0.578	-1070.6	0.578	-1073.3	0.578	-1075.3	0.578	-1085.7	0.578	-1088.8	0.578	-1090.1	0.578	-1095.3
0.579	-1095.2							1.158	-1057.2	0.579	-1063.6	0.579	-1066.2	0.579	-1069.4	0.579	-1071.3	0.579	-1073.1	0.579	-1075	0.579	-1085.7	0.579	-1088.7	0.579	-1089.7	0.579	-1095.2
0.58	-1095.1							1.16	-1058.1	0.58	-1063.8	0.58	-1065.8	0.58	-1069.6	0.58	-1071.5	0.58	-1073.4	0.58	-1075.2	0.58	-1085.6	0.58	-1088.8	0.58	-1089.9	0.58	-1095.1
0.581	-1095.4							1.162	-1058.5	0.581	-1064.5	0.581	-1065.9	0.581	-1069.7	0.581	-1071.8	0.581	-1073.2	0.581	-1075.5	0.581	-1085.9	0.581	-1088.6	0.581	-1089.7	0.581	-1095.4
0.582	-1095.2							1.164	-1058.2	0.582	-1064.7	0.582	-1065.6	0.582	-1069.8	0.582	-1071.9	0.582	-1073.7	0.582	-1076	0.582	-1085.6	0.582	-1088.6	0.582	-1089.6	0.582	-1095.2
0.583	-1095.4							1.166	-1058.2	0.583	-1065.6	0.583	-1065.9	0.583	-1070.5	0.583	-1071.9	0.583	-1074.2	0.583	-1076.3	0.583	-1085.9	0.583	-1088.1	0.583	-1089.3	0.583	-1095.4
0.584	-1094.5							1.168	-1058.1	0.584	-1065.3	0.584	-1066.2	0.584	-1070.2	0.584	-1071.9	0.584	-1074	0.584	-1076.4	0.584	-1084.8	0.584	-1088.7	0.584	-1088.9	0.584	-1094.5
0.585	-1094.9							1.17	-1057.8	0.585	-1065.8	0.585	-1066.4	0.585	-1070.4	0.585	-1072.3	0.585	-1074.9	0.585	-1077	0.585	-1085.8	0.585	-1088.4	0.585	-1089.4	0.585	-1094.9
0.586	-1094.8							1.172	-1057.5	0.586	-1066.3	0.586	-1066.5	0.586	-1070.7	0.586	-1072.5	0.586	-1074	0.586	-1076.6	0.586	-1084.3	0.586	-1087.5	0.586	-1089.3	0.586	-1094.8
0.587	-1095							1.174	-1056.8	0.587	-1066.4	0.587	-1067.5	0.587	-1070.6	0.587	-1074.2	0.587	-1074.5	0.587	-1076.8	0.587	-1084.9	0.587	-1088	0.587	-1088.8	0.587	-1095
0.588	-1094.3							1.176	-1056.9	0.588	-1066.4	0.588	-1067	0.588	-1070.8	0.588	-1073.6	0.588	-1074.4	0.588	-1077.3	0.588	-1084.7	0.588	-1087.7	0.588	-1088.8	0.588	-1094.3
0.589	-1094.2							1.178	-1057.7	0.589	-1066.3	0.589	-1067.3	0.589	-1071.1	0.589	-1073.4	0.589	-1074.4	0.589	-1078	0.589	-1084.5	0.589	-1088.1	0.589	-1089.2	0.589	-1094.2
0.59	-1094.4							1.18	-1056.2	0.59	-1066.2	0.59	-1067	0.59	-1071.4	0.59	-1073.7	0.59	-1074.3	0.59	-1076	0.59	-1083.7	0.59	-1088.3	0.59	-1089	0.59	-1094.4
0.591	-1094.2							1.182	-1056.6	0.591	-1066.5	0.591	-1067.3	0.591	-1071.5	0.591	-1074	0.591	-1074.7	0.591	-1076.1	0.591	-1083.7	0.591	-1088.4	0.591	-1089.2	0.591	-1094.2
0.592	-1095.2							1.184	-1056.3	0.592	-1066.1	0.592	-1067.7	0.592	-1071.8	0.592	-1073.9	0.592	-1074.8	0.592	-1076.6	0.592	-1083.4	0.592	-1088.3	0.592	-1089	0.592	-1095.2
0.593	-1095							1.186	-1057.2	0.593	-1066.4	0.593	-1068.6	0.593	-1071.9	0.593	-1074.5	0.593	-1074.9	0.593	-1076.5	0.593	-1084	0.593	-1087.6	0.593	-1088.9	0.593	-1095
0.594	-1094.3							1.188	-1056.3	0.594	-1066.1	0.594	-1068.2	0.594	-1071.9	0.594	-1074.3	0.594	-1074.9	0.594	-1076.9	0.594	-1083.2	0.594	-1087.3	0.594	-1088.6	0.594	-1094.3
0.595	-1094.4							1.19	-1056.5	0.595	-1066.4	0.595	-1068.1	0.595	-1071.5	0.595	-1074.6	0.595	-1075.5	0.595	-1076.1	0.595	-1083.4	0.595	-1087.5	0.595	-1089.1	0.595	-1094.4
0.596	-1094.5							1.192	-1057.2	0.596	-1066.5	0.596	-1067.9	0.596	-1071.8	0.596	-1074.2	0.596	-1075.8	0.596	-1075.8	0.596	-1083	0.596	-1087.1	0.596	-1088.6	0.596	-1094.5
0.597	-1094.4							1.194	-1056.7	0.597	-1066.6	0.597	-1068.6	0.597	-1071.8	0.597	-1075.1	0.597	-1076.3	0.597	-1076.1	0.597	-1083.2	0.597	-1087	0.597	-1088.8	0.597	-1094.4
0.598	-1094.5							1.196	-1056.6	0.598	-1066.5	0.598	-1068.3	0.598	-1072	0.598	-1075.1	0.598	-1076.2	0.598	-1075	0.598	-1083	0.598	-1086.6	0.598	-1088.6	0.598	-1094.5
0.599	-1094.6							1.198	-1056.6	0.599	-1066.6	0.599	-1069.2	0.599	-1072	0.599	-1075.1	0.599	-1076.9	0.599	-1075.9	0.599	-1083.2	0.599	-1087.3	0.599	-1088.6	0.599	-1094.6
0.6	-1094.4							1.2	-1056.9	0.6	-1066.9	0.6	-1068.8	0.6	-1072.5	0.6	-1074.9	0.6	-1077	0.6	-1075.8	0.6	-1083.1	0.6	-1087.3	0.6	-1088.9	0.6	-1094.4
0.601	-1094.8							1.202	-1057.4	0.601	-1066.5	0.601	-1068.6	0.601	-1072.3	0.601	-1075.2	0.601	-1077.1	0.601	-1076.1	0.601	-1083.6	0.601	-1087.2	0.601	-1089.2	0.601	-1094.8
0.602	-1094.4							1.204	-1057.3	0.602	-1066.8	0.602	-1067.9	0.602	-1072.6	0.602	-1075.5	0.602	-1077.1	0.602	-1076.7	0.602	-1083.5	0.602	-1086.9	0.602	-1088.9	0.602	-1094.4
0.603	-1094.8							1.206	-1057.4	0.603	-1066.7	0.603	-1068.2	0.603	-1073.5	0.603	-1076	0.603	-1077.3	0.603	-1077	0.603	-1083.7	0.603	-1087	0.603	-1089.6	0.603	-1094.8
0.604	-1094.9							1.208	-1057.1	0.604	-1066.4	0.604	-1068.1	0.604	-1073.4	0.604	-1076	0.604	-1077.1	0.604	-1076.5	0.604	-1083.5	0.604	-1086.3	0.604	-1089.5	0.604	-1094.9
0.605	-1095.6							1.21	-1057.6	0.605	-1066.8	0.605	-1068.4	0.605	-1073.4	0.605	-1075.5	0.605	-1077.5	0.605	-1076.7	0.605	-1083.2	0.605	-1086.7	0.605	-1089	0.605	-1095.6
0.606	-1095.8							1.212	-1057.8	0.606	-1066.7	0.606	-1067.8	0.606	-1073.6	0.606	-1075.9	0.606	-1077.7	0.606	-1077.2	0.606	-1083.3	0.606	-1086.2	0.606	-1088.7	0.606	-1095.8
0.607	-1095.7							1.214	-1057.9	0.607	-1066.8	0.607	-1068.2	0.607	-1073.2	0.607	-1076.1	0.607	-1077.2	0.607	-1077.4	0.607	-1083.5	0.607	-1086.5	0.607	-1089	0.607	-1095.7
0.608	-1095.3							1.216	-1057.2	0.608	-1066.8	0.608	-1068.4	0.608	-1073.5	0.608	-1076.5	0.608	-1077.2	0.608	-1076.3	0.608	-1083.4	0.608	-1086.5	0.608	-1088.5	0.608	-1095.3
0.609	-1094							1.218	-1057	0.609	-1066.7	0.609	-1068.6	0.609	-1073.2	0.609	-1076.5	0.609	-1076.8	0.609	-1077.1	0.609	-1083.6	0.609	-1086.7	0.609	-1088.8	0.609	-1094
0.61	-1094.1							1.22	-1057.8	0.61	-1066.8	0.61	-1068.3	0.61	-1073.4	0.61	-1076.9	0.61	-1077.2	0.61	-1077	0.61	-1083.5	0.61	-1086.8	0.61	-1089.3	0.61	-1094.1
0.611	-1094							1.222	-1057.5	0.611	-1067.1	0.611	-1069.1	0.611	-1073.7	0.611	-1076.9	0.611	-1077.2	0.611	-1077.8	0.611	-1083.2	0.611	-1086.6	0.611	-1089.6	0.611	-1094
0.612	-1094.7							1.224	-1058.5	0.612	-1066.6	0.612	-1069.3	0.612	-1073.3	0.612	-1077.2	0.612	-1077.7	0.612	-1078.2	0.612	-1083.2	0.612	-1085.7	0.612	-1089.2	0.612	-1094.7
0.613	-1095.6							1.226	-1059.1	0.613	-1067	0.613	-1069.2	0.613	-1072.9	0.613	-1076.9	0.613	-1078.2	0.613	-1078.1	0.613	-1083.2	0.613	-1086	0.613	-1089.6	0.613	-1095.6
0.614	-1095.9							1.228	-1059.5	0.614	-1067	0.614	-1069.3	0.614	-1073.2	0.614	-1076.6	0.614	-1078	0.614	-1078.9	0.614	-1082.7	0.614	-1086.1	0.614	-1089.4	0.614	-1095.9
0.615	-1095.4							1.23	-1060.5	0.615	-1067.2	0.615	-1068.8	0.615	-1073.2	0.615	-1076.1	0.615	-1077.7	0.615	-1078.2	0.615	-1082.6	0.615	-1086.7	0.615	-1089.3	0.615	-1095.4
0.616	-1095.7							1.232	-1060.1	0.616	-1067.4	0.616	-1069.2	0.616	-1073	0.616	-1076.5	0.616	-1078	0.616	-1078.7	0.616	-1082.8	0.616	-1086.5	0.616	-1089.4	0.616	-1095.7
0.617	-1096.2							1.234	-1058.1	0.617	-1067	0.617	-1069.4	0.617	-1073	0.617	-1075.9	0.617	-1078	0.617	-1078.8	0.617	-1082.6	0.617	-1086.7	0.617	-1088.9	0.617	-1096.2
0.618	-1095.4							1.236	-1058.5	0.618	-1067.7	0.618	-1069.6	0.618	-1073.6	0.618	-1076.8	0.618	-1077.8	0.618	-1078.8	0.618	-1083	0.618	-1086.7	0.618	-1089.3	0.618	-1095.4
0.619	-1095.9							1.238	-1058.8	0.619	-1067.7	0.619	-1070.1	0.619	-1074.1	0.619	-1077.5	0.619	-1077.9	0.619	-1078.9	0.619	-1082.8	0.619	-1086.7	0.619	-1089	0.619	-1095.9
0.62	-1095.8							1.24	-1059.5	0.62	-1067.7	0.62	-1069.3	0.62	-1073.1	0.62	-1076.9	0.62	-1078	0.62	-1079.4	0.62	-1083	0.62	-1086.3	0.62	-1089	0.62	-1095.8
0.621	-1095.8							1.242	-1059.6	0.621	-1067.5	0.621	-1069.4	0.621	-1071.9	0.621	-1077.4	0.621	-1078.9	0.621	-1079.3	0.621	-1083.3	0.621	-1086.2	0.621	-1089.2	0.621	-1095.8
0.622	-1095.8							1.244	-1059.6	0.622	-1067.7	0.622	-1069.5	0.622	-1074	0.622	-1077.2	0.622	-1078.7	0.622	-1079.4	0.622	-1083.4	0.622	-1086.8	0.622	-1089.6	0.622	-1095.8
0.623	-1095.6							1.246	-1058.7	0.623	-1067.8	0.623	-1069.5	0.623	-1074.1	0.623	-1077.2	0.623	-1078.2	0.623	-1079.7	0.623	-1082.9	0.623	-1086.4	0.623	-1089.4	0.623	-1095.6
0.624	-1095.3							1.248	-1057.6	0.624	-1068.1	0.624	-1069.6	0.624	-1074.1	0.624	-1077.2	0.624	-1078.4	0.624	-1079.8	0.624	-1083	0.624	-1086.9	0.624	-1089.4	0.624	-1095.3
0.625	-1095.6							1.25	-1057.4	0.625	-1068.4	0.625	-1069.5	0.625	-1073.8	0.625	-1077.1	0.625	-1078.5	0.625	-1079.7	0.625	-1083.5	0.625	-1087.6	0.625	-1089.6	0.625	-1095.6
0.626	-1095.2							1.252	-1057.3	0.626	-1067.9	0.626	-1069.3	0.626	-1073.7	0.626	-1076.7	0.626	-1078.5	0.626	-1079.8	0.626	-1083.2	0.626	-1087.5	0.626	-1089.8	0.626	-1095.2
0.627	-1095.3							1.254	-1057.5	0.627	-1067.6	0.627	-1069.4	0.627	-1073.7	0.627	-1076.8	0.627	-1078.7	0.627	-1080.3	0.627	-1084.1	0.627	-1086.5	0.627	-1090	0.627	-1095.3
0.628	-1095.3							1.256	-1058.2	0.628	-1068.4	0.628	-1069.5	0.628	-1074.3	0.628	-1076.9	0.628	-1078.5	0.628	-1080.4	0.628	-1084.1	0.628	-1086.9	0.628	-1090	0.628	-1095.3
0.629	-1095.3							1.258	-1057.7	0.629	-1068.6	0.629	-1070.1	0.629	-1074.4	0.629	-1077.1	0.629	-1079.2	0.629	-1080	0.629	-1084.5	0.629	-1086.7	0.629	-1090.4	0.629	-1095.3
0.63	-1094.9							1.26	-1058	0.63	-1068.8	0.63	-1070.1	0.63	-1074.9	0.63	-1076.5	0.63	-1078.6	0.63	-1080.5	0.63	-1084.3	0.63	-1086.7	0.63	-1090.9	0.63	-1094.9
0.631	-1095							1.262	-1057.9	0.631	-1068.7	0.631	-1069.9	0.631	-1074.7	0.631	-1076.4	0.631	-1079.4	0.631	-1080.5	0.631	-1083.9	0.631	-1086.7	0.631	-1090.7	0.631	-1095
0.632	-1094.5							1.264	-1057.9	0.632	-1068.8	0.632	-1069.7	0.632	-1074.6	0.632	-1076.6	0.632	-1080	0.632	-1080.5	0.632	-1084.2	0.632	-1086.8	0.632	-1090.5	0.632	-1094.5
0.633	-1094.3							1.266	-1059.1	0.633	-1068.2	0.633	-1070.3	0.633	-1074.8	0.633	-1076.8	0.633	-1080.5	0.633	-1081.2	0.633	-1084.2	0.633	-1086.7	0.633	-1090.9	0.633	-1094.3
0.634	-1094.2							1.268	-1057.3	0.634	-1069	0.634	-1070.5	0.634	-1074.9	0.634	-1076.8	0.634	-1080.4	0.634	-1080.8	0.634	-1084	0.634	-1087.1	0.634	-1090.9	0.634	-1094.2
0.635	-1094.2							1.27	-1056.3	0.635	-1068.2	0.635	-1070.7	0.635	-1075.2	0.635	-1076.7	0.635	-1080.9	0.635	-1081	0.635	-1084.2	0.635	-1087.4	0.635	-1091.2	0.635	-1094.2
0.636	-1093.9							1.272	-1056.6	0.636	-1068.2	0.636	-1070.9	0.636	-1075	0.636	-1076.8	0.636	-1081.3	0.636	-1080.9	0.636	-1083.7	0.636	-1088.2	0.636	-1091.4	0.636	-1093.9
0.637	-1094							1.274	-1056.6	0.637	-1068.4	0.637	-1070.7	0.637	-1075	0.637	-1077.1	0.637	-1081	0.637	-1081.1	0.637	-1084	0.637	-1088.4	0.637	-1091.5	0.637	-1094
0.638	-1094.3							1.276	-1055.6	0.638	-1069.3	0.638	-1071.1	0.638	-1075.5	0.638	-1077.5	0.638	-1080.9	0.638	-1081.4	0.638	-1084.2	0.638	-1088.6	0.638	-1091.4	0.638	-1094.3
0.639	-1094.4							1.278	-1055.8	0.639	-1068	0.639	-1070.3	0.639	-1075.7	0.639	-1077.5	0.639	-1079.8	0.639	-1081.9	0.639	-1084.6	0.639	-1088.4	0.639	-1091.4	0.639	-1094.4
0.64	-1094.2							1.28	-1056.1	0.64	-1068.5	0.64	-1070.7	0.64	-1075.3	0.64	-1077.5	0.64	-1081	0.64	-1082	0.64	-1084	0.64	-1088.4	0.64	-1091.7	0.64	-1094.2
0.641	-1094.7							1.282	-1055.7	0.641	-1068.6	0.641	-1071.1	0.641	-1075.5	0.641	-1077.9	0.641	-1081	0.641	-1082.5	0.641	-1084.5	0.641	-1088.3	0.641	-1091.9	0.641	-1094.7
0.642	-1094.7							1.284	-1055.6	0.642	-1068.5	0.642	-1071.2	0.642	-1076.4	0.642	-1077.8	0.642	-1081.3	0.642	-1082.2	0.642	-1084	0.642	-1088.3	0.642	-1091.9	0.642	-1094.7
0.643	-1094.9							1.286	-1056.5	0.643	-1068.7	0.643	-1070.8	0.643	-1076.2	0.643	-1078.1	0.643	-1081.5	0.643	-1082.3	0.643	-1084.3	0.643	-1088.6	0.643	-1092.4	0.643	-1094.9
0.644	-1094.9							1.288	-1056.5	0.644	-1069.1	0.644	-1071.5	0.644	-1076.4	0.644	-1078	0.644	-1081.6	0.644	-1082.1	0.644	-1084.8	0.644	-1088.3	0.644	-1092.6	0.644	-1094.9
0.645	-1095.4							1.29	-1056.3	0.645	-1069	0.645	-1070.8	0.645	-1076.8	0.645	-1077.9	0.645	-1081.1	0.645	-1082.2	0.645	-1085.1	0.645	-1088.7	0.645	-1092.9	0.645	-1095.4
0.646	-1095.6							1.292	-1055.7	0.646	-1069.1	0.646	-1071.2	0.646	-1076.6	0.646	-1078.5	0.646	-1081.3	0.646	-1082.5	0.646	-1085.6	0.646	-1088.9	0.646	-1093	0.646	-1095.6
0.647	-1095.7							1.294	-1055.9	0.647	-1068.8	0.647	-1071.5	0.647	-1077.4	0.647	-1078.2	0.647	-1081.7	0.647	-1082.1	0.647	-1086.2	0.647	-1088.8	0.647	-1092.9	0.647	-1095.7
0.648	-1095.6							1.296	-1055.7	0.648	-1069.3	0.648	-1071.2	0.648	-1076.9	0.648	-1078.8	0.648	-1081.9	0.648	-1082.2	0.648	-1086	0.648	-1088.6	0.648	-1093.2	0.648	-1095.6
0.649	-1095.5							1.298	-1055.8	0.649	-1069.3	0.649	-1071.8	0.649	-1077.2	0.649	-1078.4	0.649	-1081.8	0.649	-1082.5	0.649	-1086.9	0.649	-1089.3	0.649	-1093.3	0.649	-1095.5
0.65	-1095.8							1.3	-1055.3	0.65	-1069.2	0.65	-1072.2	0.65	-1077.1	0.65	-1079.1	0.65	-1082.3	0.65	-1082.7	0.65	-1087	0.65	-1089.6	0.65	-1093.5	0.65	-1095.8
0.651	-1096							1.302	-1056.2	0.651	-1068.8	0.651	-1072.6	0.651	-1076.9	0.651	-1077.9	0.651	-1082.2	0.651	-1082.8	0.651	-1087.4	0.651	-1089.6	0.651	-1093	0.651	-1096
0.652	-1096.7							1.304	-1056.3	0.652	-1069	0.652	-1072.2	0.652	-1077.1	0.652	-1078.4	0.652	-1082.3	0.652	-1083.5	0.652	-1087.3	0.652	-1089	0.652	-1093.6	0.652	-1096.7
0.653	-1096.8							1.306	-1057.2	0.653	-1068.6	0.653	-1071.5	0.653	-1077.3	0.653	-1079.2	0.653	-1082.4	0.653	-1083.6	0.653	-1087.3	0.653	-1089.6	0.653	-1093.7	0.653	-1096.8
0.654	-1096.5							1.308	-1057	0.654	-1069.7	0.654	-1071.7	0.654	-1077.1	0.654	-1079.1	0.654	-1082.3	0.654	-1083.9	0.654	-1087.8	0.654	-1089.3	0.654	-1093.5	0.654	-1096.5
0.655	-1097							1.31	-1057.3	0.655	-1069.7	0.655	-1071.5	0.655	-1077.1	0.655	-1079.1	0.655	-1082.3	0.655	-1083.2	0.655	-1087.8	0.655	-1089.5	0.655	-1093.9	0.655	-1097
0.656	-1096.8							1.312	-1057.2	0.656	-1069.7	0.656	-1071.5	0.656	-1077.6	0.656	-1079.2	0.656	-1082.3	0.656	-1083.5	0.656	-1088.3	0.656	-1089.5	0.656	-1094	0.656	-1096.8
0.657	-1097.4							1.314	-1057.5	0.657	-1069.4	0.657	-1071.4	0.657	-1077.6	0.657	-1079.2	0.657	-1082.2	0.657	-1083.8	0.657	-1088.4	0.657	-1089.7	0.657	-1094.5	0.657	-1097.4
0.658	-1097.5							1.316	-1057	0.658	-1069.6	0.658	-1071.3	0.658	-1078.3	0.658	-1079.6	0.658	-1082.2	0.658	-1083.5	0.658	-1088.2	0.658	-1089.6	0.658	-1094.3	0.658	-1097.5
0.659	-1097.8							1.318	-1057.6	0.659	-1069.1	0.659	-1072	0.659	-1077.5	0.659	-1079.7	0.659	-1082.8	0.659	-1083.4	0.659	-1088.3	0.659	-1090.1	0.659	-1094.7	0.659	-1097.8
0.66	-1097.9							1.32	-1057.3	0.66	-1069.3	0.66	-1071.8	0.66	-1077.6	0.66	-1079.8	0.66	-1083	0.66	-1083.6	0.66	-1088.3	0.66	-1089.7	0.66	-1094.7	0.66	-1097.9
0.661	-1098.4							1.322	-1057.6	0.661	-1069.5	0.661	-1072.3	0.661	-1077.3	0.661	-1079.8	0.661	-1082.6	0.661	-1083.6	0.661	-1089.3	0.661	-1090.5	0.661	-1094.7	0.661	-1098.4
0.662	-1098.2							1.324	-1057.2	0.662	-1069.1	0.662	-1072.3	0.662	-1077.2	0.662	-1079.9	0.662	-1082.9	0.662	-1083.9	0.662	-1088.3	0.662	-1090.7	0.662	-1095.3	0.662	-1098.2
0.663	-1099							1.326	-1057.7	0.663	-1068.6	0.663	-1072.4	0.663	-1077.3	0.663	-1080.2	0.663	-1083.1	0.663	-1084.6	0.663	-1088.6	0.663	-1090.3	0.663	-1095.3	0.663	-1099
0.664	-1098.4							1.328	-1056.8	0.664	-1068.5	0.664	-1072.6	0.664	-1077.1	0.664	-1080.5	0.664	-1083.3	0.664	-1084.9	0.664	-1089.2	0.664	-1090.1	0.664	-1095.6	0.664	-1098.4
0.665	-1099							1.33	-1057.5	0.665	-1068.7	0.665	-1072.5	0.665	-1077.4	0.665	-1080.8	0.665	-1083.5	0.665	-1084.4	0.665	-1089	0.665	-1090.4	0.665	-1095.7	0.665	-1099
0.666	-1098.9							1.332	-1057.2	0.666	-1068.7	0.666	-1073	0.666	-1077.9	0.666	-1081	0.666	-1083.9	0.666	-1085.1	0.666	-1089.2	0.666	-1090.3	0.666	-1096.1	0.666	-1098.9
0.667	-1098.8							1.334	-1057	0.667	-1068.6	0.667	-1073.4	0.667	-1077.6	0.667	-1081	0.667	-1084.2	0.667	-1085	0.667	-1088.7	0.667	-1091	0.667	-1096.1	0.667	-1098.8
0.668	-1099.1							1.336	-1056.8	0.668	-1068.6	0.668	-1073.4	0.668	-1077.6	0.668	-1081.5	0.668	-1084.1	0.668	-1084.9	0.668	-1088.6	0.668	-1090.8	0.668	-1095.8	0.668	-1099.1
0.669	-1099.6							1.338	-1056.5	0.669	-1068.6	0.669	-1073.7	0.669	-1078	0.669	-1081.4	0.669	-1084.6	0.669	-1084.9	0.669	-1088.5	0.669	-1090.9	0.669	-1096.1	0.669	-1099.6
0.67	-1099.6							1.34	-1056.9	0.67	-1068	0.67	-1073.7	0.67	-1078.1	0.67	-1081.4	0.67	-1084.1	0.67	-1085.7	0.67	-1087.7	0.67	-1091.3	0.67	-1096.2	0.67	-1099.6
0.671	-1099.7							1.342	-1057.4	0.671	-1068.4	0.671	-1073.1	0.671	-1078.2	0.671	-1082	0.671	-1083.9	0.671	-1085.2	0.671	-1087.3	0.671	-1091.5	0.671	-1097.1	0.671	-1099.7
0.672	-1099.7							1.344	-1057.6	0.672	-1068	0.672	-1073.4	0.672	-1078.5	0.672	-1082	0.672	-1084.5	0.672	-1085.2	0.672	-1087.9	0.672	-1091.8	0.672	-1096.8	0.672	-1099.7
0.673	-1100.6							1.346	-1057.4	0.673	-1068.3	0.673	-1073.3	0.673	-1078.7	0.673	-1081.5	0.673	-1084	0.673	-1085.7	0.673	-1087.8	0.673	-1091.7	0.673	-1097.2	0.673	-1100.6
0.674	-1100.1							1.348	-1056.9	0.674	-1068.5	0.674	-1073.5	0.674	-1078.6	0.674	-1081.1	0.674	-1083.8	0.674	-1085.7	0.674	-1088.3	0.674	-1091.6	0.674	-1097.4	0.674	-1100.1
0.675	-1100.8							1.35	-1057.6	0.675	-1068.5	0.675	-1072.3	0.675	-1078.8	0.675	-1081.3	0.675	-1083.9	0.675	-1086.3	0.675	-1088.6	0.675	-1092	0.675	-1097.8	0.675	-1100.8
0.676	-1100.7							1.352	-1057.7	0.676	-1069.5	0.676	-1072.4	0.676	-1078.8	0.676	-1080.8	0.676	-1085	0.676	-1085.3	0.676	-1088.1	0.676	-1091.7	0.676	-1097.8	0.676	-1100.7
0.677	-1101.4							1.354	-1057.1	0.677	-1069.2	0.677	-1072.5	0.677	-1078.8	0.677	-1081	0.677	-1085.7	0.677	-1085.8	0.677	-1088.7	0.677	-1092	0.677	-1097.9	0.677	-1101.4
0.678	-1101.1							1.356	-1056.1	0.678	-1069.1	0.678	-1072.4	0.678	-1078.9	0.678	-1081.3	0.678	-1085.1	0.678	-1085.9	0.678	-1088.5	0.678	-1092.4	0.678	-1098	0.678	-1101.1
0.679	-1101.3							1.358	-1055.7	0.679	-1068.5	0.679	-1072.2	0.679	-1079.4	0.679	-1081.1	0.679	-1085.6	0.679	-1085.7	0.679	-1089.2	0.679	-1092	0.679	-1097.8	0.679	-1101.3
0.68	-1101.4							1.36	-1055.9	0.68	-1068.6	0.68	-1072.3	0.68	-1079.4	0.68	-1081.1	0.68	-1085.8	0.68	-1085.7	0.68	-1089.5	0.68	-1092.2	0.68	-1097.9	0.68	-1101.4
0.681	-1101.8							1.362	-1056.3	0.681	-1068.5	0.681	-1072.6	0.681	-1078.8	0.681	-1081.1	0.681	-1085.6	0.681	-1086.4	0.681	-1090.2	0.681	-1093.1	0.681	-1098.1	0.681	-1101.8
0.682	-1102							1.364	-1056.8	0.682	-1068.6	0.682	-1072.4	0.682	-1078.8	0.682	-1081.3	0.682	-1085.8	0.682	-1086.2	0.682	-1089.9	0.682	-1093	0.682	-1098	0.682	-1102
0.683	-1102.6							1.366	-1056.2	0.683	-1068.7	0.683	-1072.8	0.683	-1078.3	0.683	-1081.3	0.683	-1086.1	0.683	-1087.3	0.683	-1090.1	0.683	-1093.1	0.683	-1098.5	0.683	-1102.6
0.684	-1102.5							1.368	-1056	0.684	-1068.5	0.684	-1072.6	0.684	-1077.9	0.684	-1081.2	0.684	-1086	0.684	-1086.6	0.684	-1090.1	0.684	-1093.6	0.684	-1097.9	0.684	-1102.5
0.685	-1103.3							1.37	-1056.5	0.685	-1068.3	0.685	-1072.6	0.685	-1078.2	0.685	-1081.3	0.685	-1086.5	0.685	-1087.8	0.685	-1090.3	0.685	-1094.2	0.685	-1098.7	0.685	-1103.3
0.686	-1103.3							1.372	-1055.8	0.686	-1068.5	0.686	-1073	0.686	-1078	0.686	-1081.1	0.686	-1085.6	0.686	-1087.2	0.686	-1090.5	0.686	-1094.2	0.686	-1099.2	0.686	-1103.3
0.687	-1104							1.374	-1055.5	0.687	-1068.3	0.687	-1073	0.687	-1078.2	0.687	-1081.1	0.687	-1086.9	0.687	-1087.1	0.687	-1090.7	0.687	-1094.4	0.687	-1099.5	0.687	-1104
0.688	-1104.3							1.376	-1056	0.688	-1068.2	0.688	-1072.8	0.688	-1077.7	0.688	-1081.6	0.688	-1087.1	0.688	-1087.3	0.688	-1091	0.688	-1094.7	0.688	-1100	0.688	-1104.3
0.689	-1103.8							1.378	-1055.6	0.689	-1068.4	0.689	-1072.9	0.689	-1078.1	0.689	-1081.4	0.689	-1086.4	0.689	-1087.4	0.689	-1091.3	0.689	-1094.7	0.689	-1100	0.689	-1103.8
0.69	-1103.9							1.38	-1055.9	0.69	-1068.6	0.69	-1072.8	0.69	-1078.4	0.69	-1080.8	0.69	-1086.7	0.69	-1087.7	0.69	-1091.2	0.69	-1094.8	0.69	-1100.4	0.69	-1103.9
0.691	-1103.8							1.382	-1055.6	0.691	-1068.4	0.691	-1072.6	0.691	-1078.2	0.691	-1081.1	0.691	-1087.5	0.691	-1088	0.691	-1091.3	0.691	-1094.9	0.691	-1100.6	0.691	-1103.8
0.692	-1103.7							1.384	-1055.5	0.692	-1068.5	0.692	-1072.7	0.692	-1078.5	0.692	-1081.9	0.692	-1087.8	0.692	-1088	0.692	-1091.8	0.692	-1094.9	0.692	-1100.8	0.692	-1103.7
0.693	-1103.8							1.386	-1055.9	0.693	-1067.9	0.693	-1072.5	0.693	-1078.3	0.693	-1081.2	0.693	-1087.6	0.693	-1088.3	0.693	-1092	0.693	-1095.8	0.693	-1100.7	0.693	-1103.8
0.694	-1103.8							1.388	-1055.5	0.694	-1068.4	0.694	-1072.4	0.694	-1078.9	0.694	-1081.9	0.694	-1087.9	0.694	-1088.8	0.694	-1092	0.694	-1096.1	0.694	-1100.5	0.694	-1103.8
0.695	-1104.3							1.39	-1056	0.695	-1068.1	0.695	-1072.6	0.695	-1079.8	0.695	-1081.7	0.695	-1087.7	0.695	-1088.8	0.695	-1092.3	0.695	-1096.1	0.695	-1100.8	0.695	-1104.3
0.696	-1104.2							1.392	-1056.6	0.696	-1068.2	0.696	-1072.6	0.696	-1078.7	0.696	-1081.9	0.696	-1088.5	0.696	-1089	0.696	-1092.6	0.696	-1096.7	0.696	-1101.2	0.696	-1104.2
0.697	-1104.3							1.394	-1056.5	0.697	-1069.2	0.697	-1072.4	0.697	-1079.6	0.697	-1081.9	0.697	-1087.9	0.697	-1088.4	0.697	-1093.1	0.697	-1096	0.697	-1101.1	0.697	-1104.3
0.698	-1104.8							1.396	-1056.6	0.698	-1069	0.698	-1072.9	0.698	-1078.2	0.698	-1082.7	0.698	-1086.7	0.698	-1088.6	0.698	-1093.1	0.698	-1096.7	0.698	-1101.4	0.698	-1104.8
0.699	-1104.8							1.398	-1055.8	0.699	-1069	0.699	-1072.8	0.699	-1078.2	0.699	-1082.7	0.699	-1087	0.699	-1089.3	0.699	-1093.4	0.699	-1096.7	0.699	-1101.5	0.699	-1104.8
0.7	-1104.9							1.4	-1056.3	0.7	-1068.7	0.7	-1072.6	0.7	-1078.4	0.7	-1082.1	0.7	-1087.6	0.7	-1089.1	0.7	-1093.8	0.7	-1097	0.7	-1101.5	0.7	-1104.9
0.701	-1105.4							1.402	-1056.2	0.701	-1068.6	0.701	-1072.4	0.701	-1077.6	0.701	-1082.4	0.701	-1087.6	0.701	-1088.9	0.701	-1094.6	0.701	-1097.5	0.701	-1102.1	0.701	-1105.4
0.702	-1105.3							1.404	-1056.2	0.702	-1069.3	0.702	-1072.7	0.702	-1077.9	0.702	-1082.7	0.702	-1087.2	0.702	-1088.4	0.702	-1094.5	0.702	-1097.6	0.702	-1101.7	0.702	-1105.3
0.703	-1105.9							1.406	-1056.3	0.703	-1069.8	0.703	-1072.7	0.703	-1077.8	0.703	-1082.1	0.703	-1087.7	0.703	-1088.9	0.703	-1094.8	0.703	-1098.1	0.703	-1102.3	0.703	-1105.9
0.704	-1106.2							1.408	-1056.3	0.704	-1069.4	0.704	-1072.6	0.704	-1078.2	0.704	-1081.6	0.704	-1087.3	0.704	-1089.2	0.704	-1094.9	0.704	-1099.2	0.704	-1102.4	0.704	-1106.2
0.705	-1106.3							1.41	-1056.5	0.705	-1069.4	0.705	-1072.2	0.705	-1077.9	0.705	-1081.7	0.705	-1087.4	0.705	-1089.5	0.705	-1095.5	0.705	-1097.8	0.705	-1102.8	0.705	-1106.3
0.706	-1105.9							1.412	-1056.4	0.706	-1069.1	0.706	-1072.5	0.706	-1078.2	0.706	-1081.9	0.706	-1087.4	0.706	-1089.6	0.706	-1095.5	0.706	-1098.2	0.706	-1102.2	0.706	-1105.9
0.707	-1106.4							1.414	-1056.6	0.707	-1069.6	0.707	-1072.7	0.707	-1077.9	0.707	-1081.9	0.707	-1087.7	0.707	-1090.1	0.707	-1095.8	0.707	-1097.9	0.707	-1102.5	0.707	-1106.4
0.708	-1106.3							1.416	-1056.2	0.708	-1069.6	0.708	-1072.5	0.708	-1078.2	0.708	-1081.7	0.708	-1087.9	0.708	-1090.4	0.708	-1096.2	0.708	-1097.9	0.708	-1103.6	0.708	-1106.3
0.709	-1106.7							1.418	-1056.8	0.709	-1068.8	0.709	-1072.7	0.709	-1078.6	0.709	-1082.1	0.709	-1088.5	0.709	-1090.5	0.709	-1096.4	0.709	-1098.4	0.709	-1103.2	0.709	-1106.7
0.71	-1106.7							1.42	-1058.1	0.71	-1068.3	0.71	-1072.8	0.71	-1078	0.71	-1082.4	0.71	-1088	0.71	-1090.1	0.71	-1095.7	0.71	-1098.3	0.71	-1103.8	0.71	-1106.7
0.711	-1106.7							1.422	-1057.9	0.711	-1069.1	0.711	-1072.1	0.711	-1078.6	0.711	-1082.3	0.711	-1088.2	0.711	-1090.5	0.711	-1096.4	0.711	-1098.5	0.711	-1103.9	0.711	-1106.7
0.712	-1107.3							1.424	-1058.2	0.712	-1067.4	0.712	-1072.5	0.712	-1078.2	0.712	-1083.1	0.712	-1088.4	0.712	-1090.4	0.712	-1096	0.712	-1098.4	0.712	-1103.8	0.712	-1107.3
0.713	-1106.7							1.426	-1057.6	0.713	-1068.3	0.713	-1072.5	0.713	-1078.5	0.713	-1083.2	0.713	-1087.4	0.713	-1090.5	0.713	-1096.6	0.713	-1099.1	0.713	-1104.2	0.713	-1106.7
0.714	-1107.5							1.428	-1057.4	0.714	-1068.1	0.714	-1072.4	0.714	-1078.1	0.714	-1082.6	0.714	-1087.8	0.714	-1090.5	0.714	-1096.4	0.714	-1099	0.714	-1104.2	0.714	-1107.5
0.715	-1107.4							1.43	-1057.6	0.715	-1067.1	0.715	-1072.4	0.715	-1078.3	0.715	-1082.1	0.715	-1087.8	0.715	-1090.8	0.715	-1096.8	0.715	-1099.6	0.715	-1104.8	0.715	-1107.4
0.716	-1107.9							1.432	-1057.7	0.716	-1067.4	0.716	-1072.2	0.716	-1078.7	0.716	-1081.4	0.716	-1088.3	0.716	-1090.5	0.716	-1096.8	0.716	-1100	0.716	-1104.6	0.716	-1107.9
0.717	-1108.4							1.434	-1058.6	0.717	-1067.5	0.717	-1072.1	0.717	-1078.6	0.717	-1081.6	0.717	-1088.2	0.717	-1091.1	0.717	-1097.1	0.717	-1100	0.717	-1105.3	0.717	-1108.4
0.718	-1108.7							1.436	-1059.1	0.718	-1067.2	0.718	-1072.1	0.718	-1078.6	0.718	-1081.9	0.718	-1088.6	0.718	-1091	0.718	-1097.4	0.718	-1100.1	0.718	-1105.1	0.718	-1108.7
0.719	-1108.8							1.438	-1059.1	0.719	-1067.2	0.719	-1072	0.719	-1078.1	0.719	-1081.7	0.719	-1088.1	0.719	-1091.4	0.719	-1097.2	0.719	-1100.6	0.719	-1105.9	0.719	-1108.8
0.72	-1109.1							1.44	-1059.8	0.72	-1067.3	0.72	-1072	0.72	-1077.8	0.72	-1081.4	0.72	-1088.4	0.72	-1091.4	0.72	-1097.6	0.72	-1100.9	0.72	-1105.4	0.72	-1109.1
0.721	-1109.3							1.442	-1059.2	0.721	-1067	0.721	-1072.5	0.721	-1077.6	0.721	-1082.1	0.721	-1087.9	0.721	-1091.3	0.721	-1097.9	0.721	-1100.5	0.721	-1106	0.721	-1109.3
0.722	-1109.8							1.444	-1058.4	0.722	-1067.3	0.722	-1072.1	0.722	-1077.2	0.722	-1081.3	0.722	-1088.1	0.722	-1091	0.722	-1097.7	0.722	-1100.9	0.722	-1105.4	0.722	-1109.8
0.723	-1109.7							1.446	-1059	0.723	-1066.8	0.723	-1072	0.723	-1077.1	0.723	-1081.4	0.723	-1087.7	0.723	-1091.3	0.723	-1098	0.723	-1101	0.723	-1105.9	0.723	-1109.7
0.724	-1109.8							1.448	-1059	0.724	-1066.1	0.724	-1071.7	0.724	-1076.8	0.724	-1081.7	0.724	-1087.9	0.724	-1091.5	0.724	-1097.7	0.724	-1101.8	0.724	-1105.7	0.724	-1109.8
0.725	-1109.9							1.45	-1058.7	0.725	-1066.1	0.725	-1071.9	0.725	-1077.2	0.725	-1081.3	0.725	-1088.1	0.725	-1092	0.725	-1098	0.725	-1101.5	0.725	-1106.4	0.725	-1109.9
0.726	-1110.3							1.452	-1058.8	0.726	-1066	0.726	-1072.3	0.726	-1076.5	0.726	-1081.5	0.726	-1088.1	0.726	-1092.4	0.726	-1098.5	0.726	-1102.3	0.726	-1106.4	0.726	-1110.3
0.727	-1110.7							1.454	-1057.1	0.727	-1066.2	0.727	-1070.9	0.727	-1076.2	0.727	-1081.2	0.727	-1087.8	0.727	-1093	0.727	-1098.5	0.727	-1101.5	0.727	-1106.4	0.727	-1110.7
0.728	-1110.7							1.456	-1057.6	0.728	-1065.8	0.728	-1071.3	0.728	-1076.6	0.728	-1081.7	0.728	-1088.5	0.728	-1093.3	0.728	-1098.9	0.728	-1102.3	0.728	-1106.5	0.728	-1110.7
0.729	-1109.9							1.458	-1058	0.729	-1065.4	0.729	-1071.4	0.729	-1076.6	0.729	-1082.3	0.729	-1088.1	0.729	-1093.6	0.729	-1098.7	0.729	-1101.8	0.729	-1106.4	0.729	-1109.9
0.73	-1110.9							1.46	-1057.7	0.73	-1065.3	0.73	-1071.7	0.73	-1076.6	0.73	-1082	0.73	-1088	0.73	-1093.3	0.73	-1098.7	0.73	-1102.6	0.73	-1106.4	0.73	-1110.9
0.731	-1110.7							1.462	-1058.1	0.731	-1065.5	0.731	-1071.8	0.731	-1076.7	0.731	-1082.3	0.731	-1087.7	0.731	-1093.6	0.731	-1098.7	0.731	-1102	0.731	-1106.8	0.731	-1110.7
0.732	-1111.3							1.464	-1058.5	0.732	-1065	0.732	-1071.5	0.732	-1076.3	0.732	-1081.8	0.732	-1088.6	0.732	-1093.3	0.732	-1098.5	0.732	-1101	0.732	-1106.9	0.732	-1111.3
0.733	-1111							1.466	-1058.2	0.733	-1065.8	0.733	-1071.5	0.733	-1076	0.733	-1081.8	0.733	-1087.9	0.733	-1093.5	0.733	-1098.4	0.733	-1100.8	0.733	-1107.2	0.733	-1111
0.734	-1111.3							1.468	-1057.3	0.734	-1065.1	0.734	-1072.1	0.734	-1076.4	0.734	-1081.4	0.734	-1088	0.734	-1093	0.734	-1098.7	0.734	-1101.2	0.734	-1107	0.734	-1111.3
0.735	-1111.6							1.47	-1057.2	0.735	-1064.8	0.735	-1071.9	0.735	-1076.3	0.735	-1081.5	0.735	-1088.2	0.735	-1092.7	0.735	-1097.9	0.735	-1101.7	0.735	-1107.6	0.735	-1111.6
0.736	-1112							1.472	-1058.1	0.736	-1065.3	0.736	-1072.4	0.736	-1077.2	0.736	-1082.6	0.736	-1088.3	0.736	-1092.6	0.736	-1098.1	0.736	-1102.1	0.736	-1107	0.736	-1112
0.737	-1112.2							1.474	-1057.5	0.737	-1065.1	0.737	-1070.3	0.737	-1077.1	0.737	-1081.5	0.737	-1087.6	0.737	-1093.1	0.737	-1097.9	0.737	-1101.6	0.737	-1107.8	0.737	-1112.2
0.738	-1111.9							1.476	-1057.9	0.738	-1064.7	0.738	-1069.6	0.738	-1077.4	0.738	-1081.2	0.738	-1087.7	0.738	-1092.4	0.738	-1098.6	0.738	-1101.8	0.738	-1107.7	0.738	-1111.9
0.739	-1111.7							1.478	-1057.4	0.739	-1064.3	0.739	-1069.5	0.739	-1077.6	0.739	-1081.2	0.739	-1087.5	0.739	-1092.2	0.739	-1098.6	0.739	-1102.5	0.739	-1108	0.739	-1111.7
0.74	-1112.3							1.48	-1056.9	0.74	-1064.3	0.74	-1069.8	0.74	-1077.1	0.74	-1081.4	0.74	-1087.8	0.74	-1091.7	0.74	-1099.1	0.74	-1103	0.74	-1108.1	0.74	-1112.3
0.741	-1112.3							1.482	-1057.1	0.741	-1064.1	0.741	-1069.5	0.741	-1077.8	0.741	-1081.2	0.741	-1087.4	0.741	-1091.8	0.741	-1098.7	0.741	-1102.6	0.741	-1108.5	0.741	-1112.3
0.742	-1112.5							1.484	-1058.3	0.742	-1064.3	0.742	-1069.2	0.742	-1077.6	0.742	-1080.7	0.742	-1087.9	0.742	-1091.9	0.742	-1099.6	0.742	-1103.5	0.742	-1108.5	0.742	-1112.5
0.743	-1112.6							1.486	-1057.8	0.743	-1064.2	0.743	-1069.2	0.743	-1077.2	0.743	-1080.9	0.743	-1087.2	0.743	-1091.9	0.743	-1099.2	0.743	-1103	0.743	-1108.6	0.743	-1112.6
0.744	-1112.8							1.488	-1057.5	0.744	-1064	0.744	-1069.2	0.744	-1076.6	0.744	-1080.5	0.744	-1087.2	0.744	-1092.2	0.744	-1099.6	0.744	-1103	0.744	-1109.1	0.744	-1112.8
0.745	-1112.5							1.49	-1057.2	0.745	-1064.3	0.745	-1069	0.745	-1076.1	0.745	-1080.7	0.745	-1087.2	0.745	-1092.4	0.745	-1099.3	0.745	-1103.7	0.745	-1108.6	0.745	-1112.5
0.746	-1112.8							1.492	-1057.4	0.746	-1064	0.746	-1069.2	0.746	-1076.3	0.746	-1079.9	0.746	-1087.5	0.746	-1092.2	0.746	-1099.8	0.746	-1103.4	0.746	-1108.7	0.746	-1112.8
0.747	-1113.2							1.494	-1057.2	0.747	-1063.8	0.747	-1069.1	0.747	-1075.6	0.747	-1079.8	0.747	-1087.7	0.747	-1091.9	0.747	-1099.8	0.747	-1103.8	0.747	-1108.2	0.747	-1113.2
0.748	-1112.6							1.496	-1058.2	0.748	-1063.9	0.748	-1068.9	0.748	-1076	0.748	-1079.5	0.748	-1087.7	0.748	-1092.3	0.748	-1099.9	0.748	-1103.7	0.748	-1108	0.748	-1112.6
0.749	-1113.3							1.498	-1058.6	0.749	-1063.8	0.749	-1069.1	0.749	-1076.2	0.749	-1079.3	0.749	-1087.8	0.749	-1092.1	0.749	-1100.5	0.749	-1104.3	0.749	-1108.2	0.749	-1113.3
0.75	-1113.5							1.5	-1058.3	0.75	-1064	0.75	-1069.2	0.75	-1075	0.75	-1079.2	0.75	-1087.8	0.75	-1092.2	0.75	-1100.4	0.75	-1104.7	0.75	-1108.6	0.75	-1113.5
0.751	-1114							1.502	-1059.3	0.751	-1064.9	0.751	-1070	0.751	-1074.8	0.751	-1079.2	0.751	-1087.6	0.751	-1092	0.751	-1100.3	0.751	-1105.1	0.751	-1108.9	0.751	-1114
0.752	-1114.2							1.504	-1057.3	0.752	-1064.6	0.752	-1069.7	0.752	-1074.7	0.752	-1079.2	0.752	-1086.9	0.752	-1092.9	0.752	-1100.1	0.752	-1105.2	0.752	-1109	0.752	-1114.2
0.753	-1114							1.506	-1057.4	0.753	-1064.2	0.753	-1069.5	0.753	-1074.9	0.753	-1078.6	0.753	-1085.7	0.753	-1093	0.753	-1100.4	0.753	-1105.4	0.753	-1108.8	0.753	-1114
0.754	-1114.4							1.508	-1057.4	0.754	-1064.1	0.754	-1069.5	0.754	-1074.4	0.754	-1077.6	0.754	-1086.3	0.754	-1093.1	0.754	-1100.3	0.754	-1106.1	0.754	-1108.4	0.754	-1114.4
0.755	-1114.5							1.51	-1057.3	0.755	-1063.8	0.755	-1069.7	0.755	-1074.7	0.755	-1077.5	0.755	-1086	0.755	-1093.1	0.755	-1100.3	0.755	-1105.4	0.755	-1109	0.755	-1114.5
0.756	-1114.4							1.512	-1057	0.756	-1063.8	0.756	-1069.6	0.756	-1074.6	0.756	-1077.1	0.756	-1085.6	0.756	-1093.1	0.756	-1100.3	0.756	-1105.3	0.756	-1109.1	0.756	-1114.4
0.757	-1114							1.514	-1056.8	0.757	-1064.9	0.757	-1069.6	0.757	-1075.1	0.757	-1076.5	0.757	-1085.6	0.757	-1093.5	0.757	-1100.7	0.757	-1104.9	0.757	-1109.4	0.757	-1114
0.758	-1114.8							1.516	-1057.1	0.758	-1064.7	0.758	-1068.6	0.758	-1074.9	0.758	-1076.1	0.758	-1085.4	0.758	-1093.3	0.758	-1101	0.758	-1105.1	0.758	-1110.2	0.758	-1114.8
0.759	-1114.8							1.518	-1057.6	0.759	-1065.4	0.759	-1068.5	0.759	-1075.3	0.759	-1076.4	0.759	-1085.9	0.759	-1093.2	0.759	-1101.2	0.759	-1104.8	0.759	-1109.6	0.759	-1114.8
0.76	-1115.1							1.52	-1057.3	0.76	-1065.3	0.76	-1068.4	0.76	-1075.5	0.76	-1076	0.76	-1085.4	0.76	-1093.3	0.76	-1101.4	0.76	-1104.7	0.76	-1109.2	0.76	-1115.1
0.761	-1115							1.522	-1057.2	0.761	-1065.3	0.761	-1068.3	0.761	-1074.5	0.761	-1076	0.761	-1085.6	0.761	-1093.4	0.761	-1101	0.761	-1104.8	0.761	-1109.7	0.761	-1115
0.762	-1115.5							1.524	-1056.9	0.762	-1065.4	0.762	-1068.5	0.762	-1073.9	0.762	-1076.1	0.762	-1085.4	0.762	-1093.2	0.762	-1100.6	0.762	-1105.2	0.762	-1109.3	0.762	-1115.5
0.763	-1115.3							1.526	-1056.8	0.763	-1065.2	0.763	-1067.8	0.763	-1073.6	0.763	-1076.1	0.763	-1085.3	0.763	-1093.5	0.763	-1100.4	0.763	-1104.9	0.763	-1109.7	0.763	-1115.3
0.764	-1115.6							1.528	-1056.5	0.764	-1065.1	0.764	-1067.4	0.764	-1073.8	0.764	-1076.4	0.764	-1085	0.764	-1093.7	0.764	-1100.7	0.764	-1105.1	0.764	-1109.5	0.764	-1115.6
0.765	-1116.2							1.53	-1056.6	0.765	-1065.4	0.765	-1067.5	0.765	-1073.9	0.765	-1075.8	0.765	-1084.7	0.765	-1093.7	0.765	-1100.6	0.765	-1104.3	0.765	-1109.3	0.765	-1116.2
0.766	-1116.6							1.532	-1056.6	0.766	-1065.2	0.766	-1067.2	0.766	-1074	0.766	-1076.6	0.766	-1083.8	0.766	-1093.5	0.766	-1101	0.766	-1104.6	0.766	-1109.8	0.766	-1116.6
0.767	-1116.5							1.534	-1056.4	0.767	-1065.3	0.767	-1067.6	0.767	-1074	0.767	-1076.4	0.767	-1084	0.767	-1093.6	0.767	-1101.1	0.767	-1105.2	0.767	-1110.3	0.767	-1116.5
0.768	-1116.6							1.536	-1057.1	0.768	-1065	0.768	-1067.1	0.768	-1073.9	0.768	-1076.4	0.768	-1084	0.768	-1093.8	0.768	-1101.6	0.768	-1105.6	0.768	-1110.4	0.768	-1116.6
0.769	-1116.2							1.538	-1056.6	0.769	-1063.6	0.769	-1067.3	0.769	-1073.7	0.769	-1075.5	0.769	-1083.6	0.769	-1093.9	0.769	-1102	0.769	-1105.1	0.769	-1110.3	0.769	-1116.2
0.77	-1116.4							1.54	-1056.6	0.77	-1064.1	0.77	-1067	0.77	-1073.8	0.77	-1075.6	0.77	-1084.1	0.77	-1093.6	0.77	-1101.8	0.77	-1105.5	0.77	-1110	0.77	-1116.4
0.771	-1115.3							1.542	-1055.8	0.771	-1062.9	0.771	-1067	0.771	-1073.7	0.771	-1075.5	0.771	-1083.9	0.771	-1093.3	0.771	-1101.7	0.771	-1105.6	0.771	-1109.1	0.771	-1115.3
0.772	-1115.5							1.544	-1056.6	0.772	-1063.2	0.772	-1067.2	0.772	-1073.4	0.772	-1075.1	0.772	-1083.8	0.772	-1093.5	0.772	-1101.8	0.772	-1105.7	0.772	-1109.4	0.772	-1115.5
0.773	-1115.6							1.546	-1056.7	0.773	-1063.2	0.773	-1066.2	0.773	-1073.5	0.773	-1074.7	0.773	-1083	0.773	-1093.2	0.773	-1101.8	0.773	-1105.5	0.773	-1108.8	0.773	-1115.6
0.774	-1116.1							1.548	-1056.2	0.774	-1062.8	0.774	-1066.3	0.774	-1073.4	0.774	-1074.5	0.774	-1083	0.774	-1093	0.774	-1102.3	0.774	-1105.8	0.774	-1109.2	0.774	-1116.1
0.775	-1117							1.55	-1056.2	0.775	-1062.6	0.775	-1066.5	0.775	-1073.1	0.775	-1074.8	0.775	-1082.7	0.775	-1093.1	0.775	-1102.5	0.775	-1105.4	0.775	-1110.2	0.775	-1117
0.776	-1117.3							1.552	-1056	0.776	-1062.6	0.776	-1066.5	0.776	-1073	0.776	-1075	0.776	-1083	0.776	-1092.8	0.776	-1102.7	0.776	-1105.6	0.776	-1110.1	0.776	-1117.3
0.777	-1117.6							1.554	-1056.2	0.777	-1062.7	0.777	-1066.4	0.777	-1071.9	0.777	-1074.8	0.777	-1083	0.777	-1093.1	0.777	-1102.8	0.777	-1105.1	0.777	-1110.6	0.777	-1117.6
0.778	-1118							1.556	-1055.6	0.778	-1063.2	0.778	-1066.1	0.778	-1072	0.778	-1074.4	0.778	-1083	0.778	-1091.8	0.778	-1102.3	0.778	-1105.8	0.778	-1110.9	0.778	-1118
0.779	-1118							1.558	-1056	0.779	-1062.9	0.779	-1065.9	0.779	-1071.1	0.779	-1075	0.779	-1082.7	0.779	-1092	0.779	-1102	0.779	-1105.7	0.779	-1110.2	0.779	-1118
0.78	-1117.9							1.56	-1056	0.78	-1062.3	0.78	-1065.8	0.78	-1071.3	0.78	-1073.8	0.78	-1082.9	0.78	-1091.5	0.78	-1101.4	0.78	-1106	0.78	-1110	0.78	-1117.9
0.781	-1117.6							1.562	-1056.1	0.781	-1062.7	0.781	-1066	0.781	-1071.6	0.781	-1074.7	0.781	-1082.9	0.781	-1091.8	0.781	-1100.7	0.781	-1106.9	0.781	-1110.4	0.781	-1117.6
0.782	-1117.5							1.564	-1056.3	0.782	-1063.2	0.782	-1065.7	0.782	-1070.8	0.782	-1074.3	0.782	-1083.3	0.782	-1091.4	0.782	-1101	0.782	-1106.6	0.782	-1110.4	0.782	-1117.5
0.783	-1117.7							1.566	-1056.4	0.783	-1062.6	0.783	-1065.4	0.783	-1070.5	0.783	-1074.2	0.783	-1082.6	0.783	-1091.3	0.783	-1101.1	0.783	-1106.9	0.783	-1110.4	0.783	-1117.7
0.784	-1116.7							1.568	-1056.3	0.784	-1062.7	0.784	-1065.4	0.784	-1070.2	0.784	-1074.1	0.784	-1082.8	0.784	-1091.4	0.784	-1101.6	0.784	-1106.3	0.784	-1110.1	0.784	-1116.7
0.785	-1116.9							1.57	-1056.5	0.785	-1062.6	0.785	-1065.3	0.785	-1070.3	0.785	-1074.4	0.785	-1082.6	0.785	-1091.8	0.785	-1101.5	0.785	-1106.7	0.785	-1110.5	0.785	-1116.9
0.786	-1117.1							1.572	-1057.3	0.786	-1062.4	0.786	-1065.1	0.786	-1069.7	0.786	-1074.9	0.786	-1082.9	0.786	-1092	0.786	-1101	0.786	-1106.8	0.786	-1111.1	0.786	-1117.1
0.787	-1116.8							1.574	-1056.4	0.787	-1062.6	0.787	-1064.8	0.787	-1069.1	0.787	-1074	0.787	-1082.8	0.787	-1091.3	0.787	-1100.6	0.787	-1106.8	0.787	-1111.2	0.787	-1116.8
0.788	-1116.8							1.576	-1056.3	0.788	-1062.2	0.788	-1064.9	0.788	-1069.1	0.788	-1074.2	0.788	-1081.7	0.788	-1091.5	0.788	-1100.7	0.788	-1107.5	0.788	-1110.9	0.788	-1116.8
0.789	-1117.1							1.578	-1056	0.789	-1062.5	0.789	-1065.3	0.789	-1069.6	0.789	-1073.8	0.789	-1082.1	0.789	-1091.4	0.789	-1100.6	0.789	-1107.8	0.789	-1111	0.789	-1117.1
0.79	-1116.7							1.58	-1056	0.79	-1062.5	0.79	-1065.2	0.79	-1069.2	0.79	-1074	0.79	-1082.1	0.79	-1091.6	0.79	-1100.6	0.79	-1106.9	0.79	-1110.9	0.79	-1116.7
0.791	-1117.1							1.582	-1056.2	0.791	-1062.2	0.791	-1064.9	0.791	-1069.6	0.791	-1073.8	0.791	-1081.9	0.791	-1091.5	0.791	-1100.5	0.791	-1107.5	0.791	-1111.7	0.791	-1117.1
0.792	-1117.4							1.584	-1055.9	0.792	-1062.3	0.792	-1064.9	0.792	-1068.9	0.792	-1073.8	0.792	-1082	0.792	-1091.1	0.792	-1100.7	0.792	-1106.7	0.792	-1111.8	0.792	-1117.4
0.793	-1117							1.586	-1056.1	0.793	-1061.5	0.793	-1064.6	0.793	-1068.3	0.793	-1073.4	0.793	-1081.7	0.793	-1091.4	0.793	-1100.8	0.793	-1107.4	0.793	-1111.4	0.793	-1117
0.794	-1117.3							1.588	-1055.9	0.794	-1061.7	0.794	-1064.7	0.794	-1067.7	0.794	-1073.5	0.794	-1081.6	0.794	-1090.8	0.794	-1099.9	0.794	-1106.8	0.794	-1111.5	0.794	-1117.3
0.795	-1117.3							1.59	-1056.4	0.795	-1061.1	0.795	-1064.6	0.795	-1068.1	0.795	-1073.1	0.795	-1080.9	0.795	-1090.9	0.795	-1099.8	0.795	-1107.4	0.795	-1111.2	0.795	-1117.3
0.796	-1117.2							1.592	-1057	0.796	-1061.3	0.796	-1064.8	0.796	-1067.5	0.796	-1073	0.796	-1081.3	0.796	-1090.4	0.796	-1100.4	0.796	-1107.4	0.796	-1111.6	0.796	-1117.2
0.797	-1116.7							1.594	-1056.9	0.797	-1061.3	0.797	-1064.4	0.797	-1067.5	0.797	-1072.6	0.797	-1081.4	0.797	-1090.5	0.797	-1100.7	0.797	-1107.4	0.797	-1111.1	0.797	-1116.7
0.798	-1116.6							1.596	-1057.1	0.798	-1061.7	0.798	-1064.9	0.798	-1067.2	0.798	-1072.9	0.798	-1081.2	0.798	-1090.1	0.798	-1100.3	0.798	-1107.5	0.798	-1111.6	0.798	-1116.6
0.799	-1117							1.598	-1057.3	0.799	-1060.3	0.799	-1063.8	0.799	-1067.2	0.799	-1072.3	0.799	-1081.1	0.799	-1089.9	0.799	-1100.4	0.799	-1107.1	0.799	-1111.4	0.799	-1117
0.8	-1116.9							1.6	-1055.6	0.8	-1061.1	0.8	-1063.2	0.8	-1067	0.8	-1072.2	0.8	-1080.6	0.8	-1089.6	0.8	-1099.8	0.8	-1107.4	0.8	-1112.2	0.8	-1116.9
0.801	-1116.8							1.602	-1056.1	0.801	-1060.9	0.801	-1063.4	0.801	-1066.7	0.801	-1071.8	0.801	-1080	0.801	-1089.7	0.801	-1099.4	0.801	-1108.3	0.801	-1111.8	0.801	-1116.8
0.802	-1116.6							1.604	-1055.8	0.802	-1061.4	0.802	-1063.7	0.802	-1066.9	0.802	-1071.9	0.802	-1080.4	0.802	-1089.5	0.802	-1100	0.802	-1108	0.802	-1111.5	0.802	-1116.6
0.803	-1116.6							1.606	-1056.4	0.803	-1061.5	0.803	-1063.3	0.803	-1067.6	0.803	-1071.7	0.803	-1080.6	0.803	-1089.5	0.803	-1099.7	0.803	-1108.3	0.803	-1111.5	0.803	-1116.6
0.804	-1116.7							1.608	-1057.3	0.804	-1061.3	0.804	-1063.4	0.804	-1067.5	0.804	-1071.9	0.804	-1080	0.804	-1089.2	0.804	-1099.8	0.804	-1108	0.804	-1111.4	0.804	-1116.7
0.805	-1116.9							1.61	-1057.6	0.805	-1061.1	0.805	-1063.3	0.805	-1067.8	0.805	-1071.4	0.805	-1079.6	0.805	-1089.1	0.805	-1099.9	0.805	-1105.2	0.805	-1110.9	0.805	-1116.9
0.806	-1116.9							1.612	-1057.5	0.806	-1061.3	0.806	-1063.4	0.806	-1067.3	0.806	-1071.5	0.806	-1079.7	0.806	-1088.9	0.806	-1099.8	0.806	-1106.1	0.806	-1111.3	0.806	-1116.9
0.807	-1116.1							1.614	-1057.9	0.807	-1061.2	0.807	-1063.2	0.807	-1067.2	0.807	-1071.8	0.807	-1078.7	0.807	-1088.6	0.807	-1099.3	0.807	-1105.9	0.807	-1111.5	0.807	-1116.1
0.808	-1116.5							1.616	-1058.1	0.808	-1061.3	0.808	-1063.5	0.808	-1066.8	0.808	-1071.2	0.808	-1078.7	0.808	-1088.3	0.808	-1099.2	0.808	-1105.7	0.808	-1111.1	0.808	-1116.5
0.809	-1116.4							1.618	-1058	0.809	-1061	0.809	-1063.3	0.809	-1067.1	0.809	-1071	0.809	-1078.9	0.809	-1088.2	0.809	-1099.4	0.809	-1105.4	0.809	-1111	0.809	-1116.4
0.81	-1116.9							1.62	-1057.1	0.81	-1060.8	0.81	-1063.3	0.81	-1067	0.81	-1071	0.81	-1079.2	0.81	-1088.2	0.81	-1099.5	0.81	-1105.3	0.81	-1110.8	0.81	-1116.9
0.811	-1117.1							1.622	-1056.8	0.811	-1060.9	0.811	-1063	0.811	-1066.8	0.811	-1070.9	0.811	-1078.7	0.811	-1088	0.811	-1099	0.811	-1105.7	0.811	-1110.2	0.811	-1117.1
0.812	-1116.9							1.624	-1056.9	0.812	-1060.5	0.812	-1063.3	0.812	-1067.3	0.812	-1070.3	0.812	-1079.2	0.812	-1086.8	0.812	-1099.5	0.812	-1105.8	0.812	-1110.3	0.812	-1116.9
0.813	-1116.7							1.626	-1056.8	0.813	-1061.5	0.813	-1062.9	0.813	-1066.8	0.813	-1070.4	0.813	-1079.2	0.813	-1087.3	0.813	-1099.1	0.813	-1106.1	0.813	-1110.2	0.813	-1116.7
0.814	-1116.7							1.628	-1058	0.814	-1061.8	0.814	-1063.1	0.814	-1066.9	0.814	-1070.4	0.814	-1079.5	0.814	-1087	0.814	-1099.9	0.814	-1106.3	0.814	-1110.8	0.814	-1116.7
0.815	-1116.6							1.63	-1057.9	0.815	-1060.6	0.815	-1062.9	0.815	-1066.4	0.815	-1070.3	0.815	-1079.6	0.815	-1086.6	0.815	-1099.2	0.815	-1105.5	0.815	-1110.5	0.815	-1116.6
0.816	-1116.5							1.632	-1058.9	0.816	-1061.6	0.816	-1063.2	0.816	-1067	0.816	-1069.4	0.816	-1078.8	0.816	-1086.3	0.816	-1099.7	0.816	-1106	0.816	-1110.6	0.816	-1116.5
0.817	-1116.5							1.634	-1058	0.817	-1062	0.817	-1063.3	0.817	-1067.1	0.817	-1069.8	0.817	-1077.5	0.817	-1086.6	0.817	-1099.3	0.817	-1106.1	0.817	-1110.7	0.817	-1116.5
0.818	-1116.5							1.636	-1057.5	0.818	-1061.5	0.818	-1063.3	0.818	-1067.2	0.818	-1069.5	0.818	-1079.1	0.818	-1086.3	0.818	-1099.2	0.818	-1105.8	0.818	-1111.2	0.818	-1116.5
0.819	-1116.3							1.638	-1058.3	0.819	-1061.8	0.819	-1063	0.819	-1067.4	0.819	-1069.2	0.819	-1078.7	0.819	-1086.4	0.819	-1098.6	0.819	-1106.3	0.819	-1110.9	0.819	-1116.3
0.82	-1116.5							1.64	-1058.3	0.82	-1061.5	0.82	-1063.8	0.82	-1067.4	0.82	-1069.6	0.82	-1078.2	0.82	-1086.1	0.82	-1098.7	0.82	-1106.6	0.82	-1110.6	0.82	-1116.5
0.821	-1116.4							1.642	-1058.3	0.821	-1061.3	0.821	-1063.2	0.821	-1067.1	0.821	-1069.1	0.821	-1078.1	0.821	-1086.1	0.821	-1098.3	0.821	-1107.2	0.821	-1110.7	0.821	-1116.4
0.822	-1116.7							1.644	-1057.9	0.822	-1062.2	0.822	-1063.7	0.822	-1067.2	0.822	-1069.3	0.822	-1078.2	0.822	-1085.4	0.822	-1098.7	0.822	-1107.3	0.822	-1110.8	0.822	-1116.7
0.823	-1116.4							1.646	-1057.4	0.823	-1062	0.823	-1063.3	0.823	-1067.7	0.823	-1069.5	0.823	-1076.2	0.823	-1085.8	0.823	-1098.4	0.823	-1107.3	0.823	-1110.5	0.823	-1116.4
0.824	-1116.6							1.648	-1057.5	0.824	-1062.3	0.824	-1063.1	0.824	-1068.1	0.824	-1070.2	0.824	-1076.6	0.824	-1085.3	0.824	-1098.7	0.824	-1107.5	0.824	-1110.7	0.824	-1116.6
0.825	-1116.6							1.65	-1057	0.825	-1062.5	0.825	-1063.1	0.825	-1067.8	0.825	-1069.1	0.825	-1076.6	0.825	-1085.9	0.825	-1098.7	0.825	-1108	0.825	-1110.5	0.825	-1116.6
0.826	-1117.1							1.652	-1056.6	0.826	-1062.2	0.826	-1063.6	0.826	-1068	0.826	-1069	0.826	-1076.3	0.826	-1085.6	0.826	-1099.5	0.826	-1107.7	0.826	-1110.7	0.826	-1117.1
0.827	-1116.6							1.654	-1056.2	0.827	-1063.1	0.827	-1063	0.827	-1067.6	0.827	-1069.4	0.827	-1075.8	0.827	-1085.6	0.827	-1097.9	0.827	-1106.9	0.827	-1110.2	0.827	-1116.6
0.828	-1116.3							1.656	-1056.4	0.828	-1062.7	0.828	-1063	0.828	-1066.9	0.828	-1070	0.828	-1076.6	0.828	-1085.6	0.828	-1098.8	0.828	-1107.4	0.828	-1110.8	0.828	-1116.3
0.829	-1116.1							1.658	-1056.9	0.829	-1062.4	0.829	-1063.4	0.829	-1066.5	0.829	-1069.1	0.829	-1076.5	0.829	-1085.3	0.829	-1098.4	0.829	-1107	0.829	-1111.2	0.829	-1116.1
0.83	-1116.1							1.66	-1056.7	0.83	-1062.4	0.83	-1063.3	0.83	-1066.7	0.83	-1069.3	0.83	-1077.2	0.83	-1085.1	0.83	-1098.7	0.83	-1107.2	0.83	-1111.2	0.83	-1116.1
0.831	-1115.8							1.662	-1056.5	0.831	-1062.7	0.831	-1062.9	0.831	-1066.6	0.831	-1069.5	0.831	-1078	0.831	-1085.2	0.831	-1098.8	0.831	-1106.8	0.831	-1111	0.831	-1115.8
0.832	-1115.7							1.664	-1056.2	0.832	-1062.1	0.832	-1063.1	0.832	-1066.7	0.832	-1069.4	0.832	-1076.6	0.832	-1084.6	0.832	-1098.7	0.832	-1107.1	0.832	-1111.3	0.832	-1115.7
0.833	-1115.7							1.666	-1056.9	0.833	-1062.4	0.833	-1064.1	0.833	-1066.1	0.833	-1069.4	0.833	-1075.5	0.833	-1084.3	0.833	-1098.5	0.833	-1106.4	0.833	-1111.8	0.833	-1115.7
0.834	-1115.4							1.668	-1056.8	0.834	-1062.2	0.834	-1063.8	0.834	-1066.5	0.834	-1069.2	0.834	-1076	0.834	-1084.2	0.834	-1098.8	0.834	-1107.3	0.834	-1111.5	0.834	-1115.4
0.835	-1115.5							1.67	-1056.5	0.835	-1062.2	0.835	-1063.8	0.835	-1066.1	0.835	-1069.5	0.835	-1076.1	0.835	-1084.1	0.835	-1099.1	0.835	-1106.9	0.835	-1112.2	0.835	-1115.5
0.836	-1116							1.672	-1056	0.836	-1062.2	0.836	-1063.8	0.836	-1066.3	0.836	-1069.4	0.836	-1076	0.836	-1084	0.836	-1099	0.836	-1106.5	0.836	-1112.1	0.836	-1116
0.837	-1115.7							1.674	-1056	0.837	-1062.6	0.837	-1063.3	0.837	-1066.3	0.837	-1069.6	0.837	-1075.5	0.837	-1084.1	0.837	-1098.7	0.837	-1106.2	0.837	-1111.7	0.837	-1115.7
0.838	-1115.6							1.676	-1056.7	0.838	-1063.3	0.838	-1063.7	0.838	-1066.6	0.838	-1070	0.838	-1076.1	0.838	-1083.7	0.838	-1099	0.838	-1106	0.838	-1110.7	0.838	-1115.6
0.839	-1114.7							1.678	-1056.5	0.839	-1063.2	0.839	-1063.8	0.839	-1066.7	0.839	-1069.5	0.839	-1076.1	0.839	-1083.9	0.839	-1098.4	0.839	-1104.7	0.839	-1110.4	0.839	-1114.7
0.84	-1115.4							1.68	-1056.3	0.84	-1063	0.84	-1063.8	0.84	-1066.9	0.84	-1069.8	0.84	-1076.4	0.84	-1083.1	0.84	-1099	0.84	-1105	0.84	-1110.7	0.84	-1115.4
0.841	-1115							1.682	-1056.2	0.841	-1062.6	0.841	-1064.4	0.841	-1067.2	0.841	-1069.6	0.841	-1075.9	0.841	-1082.8	0.841	-1098.4	0.841	-1105.1	0.841	-1110.1	0.841	-1115
0.842	-1115.1							1.684	-1056.7	0.842	-1063.4	0.842	-1064.3	0.842	-1066.9	0.842	-1070	0.842	-1076.6	0.842	-1082.5	0.842	-1098.3	0.842	-1105.3	0.842	-1110	0.842	-1115.1
0.843	-1114.7							1.686	-1057.2	0.843	-1063.8	0.843	-1064	0.843	-1066.9	0.843	-1069.7	0.843	-1075.6	0.843	-1082.3	0.843	-1098.2	0.843	-1105.3	0.843	-1109.8	0.843	-1114.7
0.844	-1114.8							1.688	-1057.2	0.844	-1063.5	0.844	-1064.6	0.844	-1067.6	0.844	-1070.1	0.844	-1076.1	0.844	-1083.3	0.844	-1098.5	0.844	-1105.5	0.844	-1110.3	0.844	-1114.8
0.845	-1115.5							1.69	-1057	0.845	-1063.8	0.845	-1064.7	0.845	-1067.2	0.845	-1070.5	0.845	-1075.1	0.845	-1083.6	0.845	-1098.2	0.845	-1106.1	0.845	-1110	0.845	-1115.5
0.846	-1114.9							1.692	-1057.3	0.846	-1063.7	0.846	-1064.7	0.846	-1067.5	0.846	-1071	0.846	-1075.8	0.846	-1082.9	0.846	-1097.9	0.846	-1105	0.846	-1110.8	0.846	-1114.9
0.847	-1114.9							1.694	-1057.5	0.847	-1063	0.847	-1064.9	0.847	-1067.5	0.847	-1070.8	0.847	-1075.3	0.847	-1082.4	0.847	-1096.9	0.847	-1105.7	0.847	-1110.2	0.847	-1114.9
0.848	-1114.9							1.696	-1058.1	0.848	-1063.1	0.848	-1064.6	0.848	-1068.4	0.848	-1071.1	0.848	-1075.8	0.848	-1083	0.848	-1097.9	0.848	-1105.8	0.848	-1110.7	0.848	-1114.9
0.849	-1113.9							1.698	-1058.3	0.849	-1063.3	0.849	-1064.7	0.849	-1067.5	0.849	-1070.3	0.849	-1075.6	0.849	-1081.1	0.849	-1097.2	0.849	-1101.8	0.849	-1110.3	0.849	-1113.9
0.85	-1114							1.7	-1056.9	0.85	-1063.6	0.85	-1064.9	0.85	-1067.5	0.85	-1071.1	0.85	-1075.4	0.85	-1081.9	0.85	-1097.8	0.85	-1102.5	0.85	-1110.6	0.85	-1114
0.851	-1113.8							1.702	-1057.5	0.851	-1063.5	0.851	-1065.1	0.851	-1067.5	0.851	-1070.7	0.851	-1074.8	0.851	-1081.8	0.851	-1098.2	0.851	-1101.9	0.851	-1110.3	0.851	-1113.8
0.852	-1114							1.704	-1056.5	0.852	-1063.9	0.852	-1064.8	0.852	-1067.5	0.852	-1070.8	0.852	-1074.4	0.852	-1081.3	0.852	-1096.8	0.852	-1102.1	0.852	-1110.4	0.852	-1114
0.853	-1113.8							1.706	-1057.1	0.853	-1063.8	0.853	-1064.9	0.853	-1067	0.853	-1070.9	0.853	-1074.4	0.853	-1081.8	0.853	-1097.2	0.853	-1102.5	0.853	-1110	0.853	-1113.8
0.854	-1114.9							1.708	-1057.6	0.854	-1064.7	0.854	-1065.1	0.854	-1068	0.854	-1071	0.854	-1074.7	0.854	-1080.8	0.854	-1096.6	0.854	-1103	0.854	-1110.6	0.854	-1114.9
0.855	-1114.1							1.71	-1057.8	0.855	-1063.8	0.855	-1065	0.855	-1067.9	0.855	-1070.8	0.855	-1074.2	0.855	-1081.1	0.855	-1096.2	0.855	-1102.5	0.855	-1110	0.855	-1114.1
0.856	-1114.2							1.712	-1057.9	0.856	-1063.8	0.856	-1065.4	0.856	-1068.3	0.856	-1071.2	0.856	-1074.3	0.856	-1080	0.856	-1095.9	0.856	-1102.6	0.856	-1110.1	0.856	-1114.2
0.857	-1114.6							1.714	-1057.2	0.857	-1064.1	0.857	-1065.4	0.857	-1068.6	0.857	-1070.6	0.857	-1073.9	0.857	-1080.7	0.857	-1095.3	0.857	-1102.7	0.857	-1108.5	0.857	-1114.6
0.858	-1114.6							1.716	-1058	0.858	-1063.8	0.858	-1064.8	0.858	-1068.2	0.858	-1070.6	0.858	-1074.1	0.858	-1080.2	0.858	-1095.4	0.858	-1103.1	0.858	-1108.9	0.858	-1114.6
0.859	-1114.2							1.718	-1056.6	0.859	-1064.1	0.859	-1065.5	0.859	-1068.3	0.859	-1070.7	0.859	-1073.9	0.859	-1080.7	0.859	-1095.3	0.859	-1102.7	0.859	-1108.7	0.859	-1114.2
0.86	-1114							1.72	-1057.4	0.86	-1064.3	0.86	-1065.4	0.86	-1068.7	0.86	-1070.2	0.86	-1074.3	0.86	-1080.4	0.86	-1095	0.86	-1103.7	0.86	-1108.6	0.86	-1114
0.861	-1114.4							1.722	-1057.3	0.861	-1063.9	0.861	-1065.6	0.861	-1068.5	0.861	-1070.3	0.861	-1074.4	0.861	-1080.8	0.861	-1094.5	0.861	-1102.9	0.861	-1109.3	0.861	-1114.4
0.862	-1114.9							1.724	-1058.1	0.862	-1064	0.862	-1065.4	0.862	-1068.9	0.862	-1070.6	0.862	-1074.1	0.862	-1080.5	0.862	-1094.5	0.862	-1103.2	0.862	-1109.1	0.862	-1114.9
0.863	-1114.7							1.726	-1058.4	0.863	-1064.3	0.863	-1065.4	0.863	-1068.7	0.863	-1070.4	0.863	-1073.8	0.863	-1080.7	0.863	-1094.6	0.863	-1103.2	0.863	-1108.7	0.863	-1114.7
0.864	-1115							1.728	-1058.9	0.864	-1064	0.864	-1065.7	0.864	-1068.9	0.864	-1070.8	0.864	-1074.1	0.864	-1080.2	0.864	-1094.1	0.864	-1102.5	0.864	-1108.8	0.864	-1115
0.865	-1115.2							1.73	-1059.3	0.865	-1064.1	0.865	-1065.7	0.865	-1068.9	0.865	-1070.4	0.865	-1074	0.865	-1080.8	0.865	-1093.9	0.865	-1102.7	0.865	-1107.9	0.865	-1115.2
0.866	-1115.5							1.732	-1059.4	0.866	-1063.8	0.866	-1065.9	0.866	-1069.2	0.866	-1070.6	0.866	-1074	0.866	-1080.1	0.866	-1093.6	0.866	-1102.5	0.866	-1108.6	0.866	-1115.5
0.867	-1115.6							1.734	-1059.1	0.867	-1063.8	0.867	-1065.7	0.867	-1068.6	0.867	-1070.3	0.867	-1073.4	0.867	-1080.5	0.867	-1093	0.867	-1102.3	0.867	-1107.3	0.867	-1115.6
0.868	-1114							1.736	-1056.6	0.868	-1063.8	0.868	-1066.2	0.868	-1068.8	0.868	-1070.7	0.868	-1074.1	0.868	-1079.3	0.868	-1093.1	0.868	-1102.4	0.868	-1107.9	0.868	-1114
0.869	-1114.1							1.738	-1057.2	0.869	-1064.2	0.869	-1065.8	0.869	-1068.5	0.869	-1070.5	0.869	-1074	0.869	-1080.3	0.869	-1092.6	0.869	-1101.4	0.869	-1107.3	0.869	-1114.1
0.87	-1114.2							1.74	-1057.5	0.87	-1064.7	0.87	-1065.9	0.87	-1069.1	0.87	-1070.9	0.87	-1074.8	0.87	-1079.8	0.87	-1092.9	0.87	-1102.1	0.87	-1107.5	0.87	-1114.2
0.871	-1114.3							1.742	-1057	0.871	-1064.7	0.871	-1065.9	0.871	-1068.8	0.871	-1071.3	0.871	-1074.2	0.871	-1079.7	0.871	-1092	0.871	-1101.9	0.871	-1107.4	0.871	-1114.3
0.872	-1114.4							1.744	-1057.2	0.872	-1065.1	0.872	-1066.1	0.872	-1068.7	0.872	-1071.3	0.872	-1075	0.872	-1079.3	0.872	-1092.7	0.872	-1101.7	0.872	-1107.9	0.872	-1114.4
0.873	-1114.1							1.746	-1058.1	0.873	-1064.8	0.873	-1066.1	0.873	-1068.6	0.873	-1071.2	0.873	-1074.6	0.873	-1080.3	0.873	-1092.5	0.873	-1101.7	0.873	-1106	0.873	-1114.1
0.874	-1113.9							1.748	-1058.3	0.874	-1065	0.874	-1066.8	0.874	-1069.1	0.874	-1071.3	0.874	-1075.5	0.874	-1079.3	0.874	-1092.3	0.874	-1102	0.874	-1106.3	0.874	-1113.9
0.875	-1113.7							1.75	-1057.7	0.875	-1064.6	0.875	-1066.6	0.875	-1069.5	0.875	-1070.9	0.875	-1076.1	0.875	-1079.4	0.875	-1092	0.875	-1100.7	0.875	-1106.9	0.875	-1113.7
0.876	-1114.1							1.752	-1058.3	0.876	-1064.7	0.876	-1066.6	0.876	-1070.3	0.876	-1070.9	0.876	-1075.8	0.876	-1078.7	0.876	-1092.2	0.876	-1101.5	0.876	-1107	0.876	-1114.1
0.877	-1113.4							1.754	-1057.8	0.877	-1064.4	0.877	-1067	0.877	-1070.2	0.877	-1070.8	0.877	-1076.2	0.877	-1079.1	0.877	-1091.3	0.877	-1100.9	0.877	-1106.9	0.877	-1113.4
0.878	-1113.9							1.756	-1057.8	0.878	-1064.6	0.878	-1067	0.878	-1070.4	0.878	-1071.6	0.878	-1076.6	0.878	-1078.5	0.878	-1091.6	0.878	-1101.6	0.878	-1107.5	0.878	-1113.9
0.879	-1113.7							1.758	-1058	0.879	-1064.3	0.879	-1066.6	0.879	-1070.6	0.879	-1071.5	0.879	-1076.1	0.879	-1079.1	0.879	-1092.1	0.879	-1101.4	0.879	-1107.1	0.879	-1113.7
0.88	-1114.8							1.76	-1058.2	0.88	-1064.1	0.88	-1066.5	0.88	-1070.2	0.88	-1071.2	0.88	-1076	0.88	-1078.6	0.88	-1091.9	0.88	-1101	0.88	-1107.8	0.88	-1114.8
0.881	-1113.3							1.762	-1058	0.881	-1063.2	0.881	-1066.5	0.881	-1070.3	0.881	-1071	0.881	-1075.2	0.881	-1079.5	0.881	-1091.8	0.881	-1099.9	0.881	-1107.4	0.881	-1113.3
0.882	-1114.6							1.764	-1058.2	0.882	-1063.6	0.882	-1066.5	0.882	-1070.4	0.882	-1071.3	0.882	-1075.1	0.882	-1079.5	0.882	-1092.3	0.882	-1100.4	0.882	-1107.3	0.882	-1114.6
0.883	-1113.7							1.766	-1058.2	0.883	-1063.5	0.883	-1066.2	0.883	-1070	0.883	-1071.2	0.883	-1075.1	0.883	-1079.1	0.883	-1092.1	0.883	-1100	0.883	-1107	0.883	-1113.7
0.884	-1113.8							1.768	-1058.5	0.884	-1064	0.884	-1066.1	0.884	-1070.2	0.884	-1071.7	0.884	-1075.8	0.884	-1077.7	0.884	-1091.7	0.884	-1099.7	0.884	-1106.9	0.884	-1113.8
0.885	-1113							1.77	-1059	0.885	-1064.2	0.885	-1066.3	0.885	-1070	0.885	-1071.9	0.885	-1075.5	0.885	-1078	0.885	-1091.7	0.885	-1100	0.885	-1105.9	0.885	-1113
0.886	-1113.2							1.772	-1058.8	0.886	-1063.9	0.886	-1066.3	0.886	-1070.4	0.886	-1071.9	0.886	-1075.7	0.886	-1077.6	0.886	-1091.4	0.886	-1100.7	0.886	-1105.8	0.886	-1113.2
0.887	-1112.8							1.774	-1058.6	0.887	-1063.1	0.887	-1066.4	0.887	-1070	0.887	-1072.5	0.887	-1076	0.887	-1077.5	0.887	-1092	0.887	-1099.8	0.887	-1105.8	0.887	-1112.8
0.888	-1113.3							1.776	-1058.3	0.888	-1063.6	0.888	-1066.8	0.888	-1070.2	0.888	-1072.5	0.888	-1076.1	0.888	-1077.9	0.888	-1091.7	0.888	-1101.3	0.888	-1106	0.888	-1113.3
0.889	-1113							1.778	-1058.8	0.889	-1063.3	0.889	-1066.7	0.889	-1070.6	0.889	-1072.5	0.889	-1075.4	0.889	-1078	0.889	-1091.2	0.889	-1100.4	0.889	-1105.7	0.889	-1113
0.89	-1112.5							1.78	-1058.5	0.89	-1064.1	0.89	-1066.9	0.89	-1070.8	0.89	-1072	0.89	-1075.9	0.89	-1078	0.89	-1091.6	0.89	-1099.9	0.89	-1106.7	0.89	-1112.5
0.891	-1112.6							1.782	-1058.5	0.891	-1063.7	0.891	-1066.9	0.891	-1070.7	0.891	-1071.3	0.891	-1076.2	0.891	-1078.2	0.891	-1090.9	0.891	-1098.7	0.891	-1106.2	0.891	-1112.6
0.892	-1112.9							1.784	-1058.2	0.892	-1064.5	0.892	-1067.4	0.892	-1071.2	0.892	-1072.8	0.892	-1075.5	0.892	-1079.1	0.892	-1091.5	0.892	-1099.2	0.892	-1107	0.892	-1112.9
0.893	-1112.9							1.786	-1058.5	0.893	-1064.1	0.893	-1067.3	0.893	-1070.5	0.893	-1072.4	0.893	-1076.1	0.893	-1078.6	0.893	-1091.3	0.893	-1098.7	0.893	-1106.4	0.893	-1112.9
0.894	-1112.5							1.788	-1058.8	0.894	-1064.9	0.894	-1067.8	0.894	-1070.7	0.894	-1073	0.894	-1075.9	0.894	-1078.2	0.894	-1091.2	0.894	-1098.4	0.894	-1106.2	0.894	-1112.5
0.895	-1112.8							1.79	-1058.9	0.895	-1064.8	0.895	-1067.7	0.895	-1070.6	0.895	-1072.2	0.895	-1075.3	0.895	-1078.2	0.895	-1091.4	0.895	-1098.2	0.895	-1106	0.895	-1112.8
0.896	-1112.9							1.792	-1059	0.896	-1065.1	0.896	-1067.7	0.896	-1071.2	0.896	-1072.6	0.896	-1075.5	0.896	-1078.5	0.896	-1091.3	0.896	-1098.6	0.896	-1106.2	0.896	-1112.9
0.897	-1113.5							1.794	-1059.2	0.897	-1064.9	0.897	-1067.8	0.897	-1071.3	0.897	-1072.7	0.897	-1075	0.897	-1078.7	0.897	-1090.7	0.897	-1098.2	0.897	-1105.7	0.897	-1113.5
0.898	-1111.2							1.796	-1058.1	0.898	-1064.9	0.898	-1068	0.898	-1070.5	0.898	-1072.8	0.898	-1075.5	0.898	-1079.3	0.898	-1089.5	0.898	-1098.4	0.898	-1106.1	0.898	-1111.2
0.899	-1111.4							1.798	-1059	0.899	-1064.8	0.899	-1068	0.899	-1070.6	0.899	-1073.2	0.899	-1075.3	0.899	-1079.3	0.899	-1089.6	0.899	-1098.4	0.899	-1105.2	0.899	-1111.4
0.9	-1112.3							1.8	-1059.7	0.9	-1065	0.9	-1068.2	0.9	-1070.9	0.9	-1073.6	0.9	-1074.6	0.9	-1078.9	0.9	-1089.6	0.9	-1098	0.9	-1106.2	0.9	-1112.3
0.901	-1111.5							1.802	-1058.6	0.901	-1065.3	0.901	-1068.6	0.901	-1070.2	0.901	-1073.6	0.901	-1075.1	0.901	-1079.3	0.901	-1089.3	0.901	-1098.3	0.901	-1104.2	0.901	-1111.5
0.902	-1111.5							1.804	-1058.2	0.902	-1065.2	0.902	-1068.7	0.902	-1071	0.902	-1073.7	0.902	-1075	0.902	-1079.6	0.902	-1088.9	0.902	-1098.4	0.902	-1105	0.902	-1111.5
0.903	-1111.4							1.806	-1058.3	0.903	-1065.1	0.903	-1069.3	0.903	-1070.7	0.903	-1073.8	0.903	-1075.1	0.903	-1080.3	0.903	-1087.7	0.903	-1098	0.903	-1104.8	0.903	-1111.4
0.904	-1111.6							1.808	-1058.2	0.904	-1065.2	0.904	-1069.1	0.904	-1070.7	0.904	-1074.2	0.904	-1075.4	0.904	-1080.7	0.904	-1087.8	0.904	-1098.7	0.904	-1104.8	0.904	-1111.6
0.905	-1111.6							1.81	-1058.1	0.905	-1064.8	0.905	-1069	0.905	-1070.6	0.905	-1074	0.905	-1075.2	0.905	-1081.1	0.905	-1087.5	0.905	-1098.8	0.905	-1104.8	0.905	-1111.6
0.906	-1112.4							1.812	-1059.9	0.906	-1064.8	0.906	-1068.8	0.906	-1071.5	0.906	-1074.4	0.906	-1075.8	0.906	-1080.9	0.906	-1087.6	0.906	-1098.6	0.906	-1104.4	0.906	-1112.4
0.907	-1111.2							1.814	-1058.9	0.907	-1064.5	0.907	-1068.4	0.907	-1071	0.907	-1074.1	0.907	-1075.8	0.907	-1080.8	0.907	-1087.2	0.907	-1098.1	0.907	-1104.3	0.907	-1111.2
0.908	-1111.9							1.816	-1059.3	0.908	-1065.3	0.908	-1068.4	0.908	-1071.5	0.908	-1074.5	0.908	-1076.6	0.908	-1080.2	0.908	-1087.1	0.908	-1098.4	0.908	-1103.8	0.908	-1111.9
0.909	-1111.9							1.818	-1058.4	0.909	-1065.4	0.909	-1068.4	0.909	-1071.4	0.909	-1074.9	0.909	-1076.7	0.909	-1079.7	0.909	-1087.7	0.909	-1098	0.909	-1104	0.909	-1111.9
0.91	-1111.7							1.82	-1058.6	0.91	-1065	0.91	-1068.9	0.91	-1071.8	0.91	-1075.5	0.91	-1077.1	0.91	-1080.2	0.91	-1088	0.91	-1097.6	0.91	-1104.2	0.91	-1111.7
0.911	-1111.2							1.822	-1058.3	0.911	-1064.9	0.911	-1068.9	0.911	-1071.8	0.911	-1075.4	0.911	-1077.9	0.911	-1080.3	0.911	-1087.9	0.911	-1097.5	0.911	-1103.4	0.911	-1111.2
0.912	-1111.3							1.824	-1058.8	0.912	-1064.5	0.912	-1069.2	0.912	-1072.2	0.912	-1075.6	0.912	-1076.5	0.912	-1080.6	0.912	-1088	0.912	-1097.6	0.912	-1103.7	0.912	-1111.3
0.913	-1111.4							1.826	-1059	0.913	-1064.5	0.913	-1069.5	0.913	-1072	0.913	-1074.9	0.913	-1076.1	0.913	-1078.9	0.913	-1087.9	0.913	-1097.4	0.913	-1103.4	0.913	-1111.4
0.914	-1112.3							1.828	-1059.1	0.914	-1064.3	0.914	-1070	0.914	-1072.3	0.914	-1075.8	0.914	-1076.2	0.914	-1080.4	0.914	-1088.4	0.914	-1097.8	0.914	-1103.7	0.914	-1112.3
0.915	-1112.3							1.83	-1058.8	0.915	-1064.3	0.915	-1070	0.915	-1071.6	0.915	-1075.3	0.915	-1076	0.915	-1080	0.915	-1088	0.915	-1096.6	0.915	-1103.3	0.915	-1112.3
0.916	-1111.7							1.832	-1059	0.916	-1064.2	0.916	-1069.6	0.916	-1072.1	0.916	-1075.4	0.916	-1077.1	0.916	-1081	0.916	-1088.1	0.916	-1096.8	0.916	-1103.2	0.916	-1111.7
0.917	-1112.2							1.834	-1059.1	0.917	-1064.5	0.917	-1069.5	0.917	-1071.9	0.917	-1074.9	0.917	-1076.5	0.917	-1081.3	0.917	-1088.4	0.917	-1096.4	0.917	-1102.7	0.917	-1112.2
0.918	-1112.2							1.836	-1059.5	0.918	-1064.7	0.918	-1070	0.918	-1072.1	0.918	-1075.7	0.918	-1077.4	0.918	-1080.9	0.918	-1088.2	0.918	-1097.1	0.918	-1102.7	0.918	-1112.2
0.919	-1111.8							1.838	-1059.2	0.919	-1064.8	0.919	-1069.3	0.919	-1072.3	0.919	-1075.4	0.919	-1076.4	0.919	-1079.8	0.919	-1088	0.919	-1096.7	0.919	-1102.3	0.919	-1111.8
0.92	-1111.9							1.84	-1059.4	0.92	-1065.2	0.92	-1069.3	0.92	-1072.5	0.92	-1075.6	0.92	-1077.1	0.92	-1080	0.92	-1088.1	0.92	-1096.4	0.92	-1102.1	0.92	-1111.9
0.921	-1111.4							1.842	-1059.5	0.921	-1064.9	0.921	-1069.1	0.921	-1072.6	0.921	-1074.6	0.921	-1076.6	0.921	-1080.8	0.921	-1087.8	0.921	-1096.2	0.921	-1102	0.921	-1111.4
0.922	-1111.1							1.844	-1059	0.922	-1065.1	0.922	-1069.3	0.922	-1073.1	0.922	-1075.1	0.922	-1076.6	0.922	-1080.4	0.922	-1087.6	0.922	-1096.3	0.922	-1102	0.922	-1111.1
0.923	-1111.2							1.846	-1058.5	0.923	-1065.2	0.923	-1069.2	0.923	-1073	0.923	-1075	0.923	-1076.7	0.923	-1081.3	0.923	-1087.2	0.923	-1096.2	0.923	-1101.6	0.923	-1111.2
0.924	-1111.6							1.848	-1058.8	0.924	-1066	0.924	-1069.8	0.924	-1073.2	0.924	-1075.7	0.924	-1077.4	0.924	-1081.3	0.924	-1088	0.924	-1095.8	0.924	-1102.2	0.924	-1111.6
0.925	-1111.3							1.85	-1058.4	0.925	-1065.8	0.925	-1069.6	0.925	-1073.1	0.925	-1074.7	0.925	-1077.7	0.925	-1082.1	0.925	-1087.5	0.925	-1095.7	0.925	-1101.9	0.925	-1111.3
0.926	-1111.2							1.852	-1058.8	0.926	-1065	0.926	-1069.6	0.926	-1073.2	0.926	-1074.6	0.926	-1078.5	0.926	-1081.5	0.926	-1087.2	0.926	-1095.9	0.926	-1101.6	0.926	-1111.2
0.927	-1108.8							1.854	-1058.7	0.927	-1064.7	0.927	-1069.2	0.927	-1073.2	0.927	-1074.5	0.927	-1078.4	0.927	-1081.7	0.927	-1087.1	0.927	-1095.3	0.927	-1101.6	0.927	-1108.8
0.928	-1108.7							1.856	-1058.4	0.928	-1065.3	0.928	-1070	0.928	-1073.5	0.928	-1074.9	0.928	-1078.5	0.928	-1081	0.928	-1087.4	0.928	-1095.3	0.928	-1101.7	0.928	-1108.7
0.929	-1108.9							1.858	-1058.3	0.929	-1064.4	0.929	-1069.6	0.929	-1073	0.929	-1074.2	0.929	-1079.1	0.929	-1081.9	0.929	-1087.3	0.929	-1094.7	0.929	-1101.3	0.929	-1108.9
0.93	-1108.3							1.86	-1058.5	0.93	-1064.9	0.93	-1070	0.93	-1073.3	0.93	-1074.9	0.93	-1079.1	0.93	-1081.4	0.93	-1086.7	0.93	-1095.1	0.93	-1101.3	0.93	-1108.3
0.931	-1107.4							1.862	-1058.7	0.931	-1064.7	0.931	-1069.5	0.931	-1073.7	0.931	-1075.3	0.931	-1075.7	0.931	-1081.4	0.931	-1087	0.931	-1094.7	0.931	-1101.5	0.931	-1107.4
0.932	-1108.1							1.864	-1059.1	0.932	-1064.4	0.932	-1070.2	0.932	-1073.6	0.932	-1075.4	0.932	-1076.3	0.932	-1081.4	0.932	-1086.8	0.932	-1094.1	0.932	-1101.7	0.932	-1108.1
0.933	-1107.4							1.866	-1059.2	0.933	-1064.6	0.933	-1069.6	0.933	-1073.1	0.933	-1075.3	0.933	-1076.5	0.933	-1081.9	0.933	-1086.9	0.933	-1094	0.933	-1101.2	0.933	-1107.4
0.934	-1107.2							1.868	-1058.9	0.934	-1065.4	0.934	-1069.7	0.934	-1073.6	0.934	-1075.1	0.934	-1076.6	0.934	-1081.9	0.934	-1087.2	0.934	-1094.2	0.934	-1100.8	0.934	-1107.2
0.935	-1106.8							1.87	-1059.2	0.935	-1064.9	0.935	-1069.6	0.935	-1073.6	0.935	-1075.3	0.935	-1077.3	0.935	-1081.9	0.935	-1087	0.935	-1094.5	0.935	-1100.7	0.935	-1106.8
0.936	-1106.2							1.872	-1059.4	0.936	-1065.5	0.936	-1069.6	0.936	-1074.1	0.936	-1075.3	0.936	-1077.9	0.936	-1081.7	0.936	-1087.3	0.936	-1094.2	0.936	-1100.5	0.936	-1106.2
0.937	-1106.4							1.874	-1059.5	0.937	-1065	0.937	-1069.1	0.937	-1073.9	0.937	-1075.3	0.937	-1078.5	0.937	-1082.1	0.937	-1086.8	0.937	-1094.7	0.937	-1100.4	0.937	-1106.4
0.938	-1106.8							1.876	-1060.1	0.938	-1065.4	0.938	-1069.1	0.938	-1074.2	0.938	-1075.8	0.938	-1079	0.938	-1081.8	0.938	-1087.3	0.938	-1094.3	0.938	-1100.3	0.938	-1106.8
0.939	-1105.5							1.878	-1060.3	0.939	-1065.3	0.939	-1068.8	0.939	-1074.1	0.939	-1076.1	0.939	-1078.7	0.939	-1082.4	0.939	-1087.7	0.939	-1094.9	0.939	-1100.5	0.939	-1105.5
0.94	-1105.9							1.88	-1060.1	0.94	-1064.7	0.94	-1069.2	0.94	-1074.4	0.94	-1075.8	0.94	-1078.6	0.94	-1081.4	0.94	-1087.2	0.94	-1095.8	0.94	-1100.5	0.94	-1105.9
0.941	-1105.5							1.882	-1060.7	0.941	-1064.9	0.941	-1068.6	0.941	-1074.3	0.941	-1076	0.941	-1078.6	0.941	-1082.1	0.941	-1086.7	0.941	-1095.6	0.941	-1100	0.941	-1105.5
0.942	-1105.1							1.884	-1060.3	0.942	-1064.9	0.942	-1069	0.942	-1074.4	0.942	-1076	0.942	-1079.3	0.942	-1081.4	0.942	-1087.5	0.942	-1095.5	0.942	-1100.7	0.942	-1105.1
0.943	-1104.8							1.886	-1060.1	0.943	-1064.3	0.943	-1068.6	0.943	-1073.6	0.943	-1075.9	0.943	-1079.6	0.943	-1082	0.943	-1087.1	0.943	-1096.3	0.943	-1100.6	0.943	-1104.8
0.944	-1104.3							1.888	-1060	0.944	-1064.4	0.944	-1068.8	0.944	-1074.1	0.944	-1076.1	0.944	-1080.3	0.944	-1081.9	0.944	-1087.8	0.944	-1095.9	0.944	-1100.3	0.944	-1104.3
0.945	-1104.8							1.89	-1059.5	0.945	-1064.3	0.945	-1068.5	0.945	-1073.8	0.945	-1075.6	0.945	-1080.1	0.945	-1082.4	0.945	-1087.4	0.945	-1095.8	0.945	-1100.2	0.945	-1104.8
0.946	-1104.7							1.892	-1059.5	0.946	-1064.7	0.946	-1068.9	0.946	-1073.8	0.946	-1076	0.946	-1080.6	0.946	-1081.9	0.946	-1087.8	0.946	-1096.3	0.946	-1100.2	0.946	-1104.7
0.947	-1104.3							1.894	-1059.8	0.947	-1064.3	0.947	-1068.9	0.947	-1073.1	0.947	-1076.3	0.947	-1080.1	0.947	-1082.3	0.947	-1087.8	0.947	-1096.5	0.947	-1100	0.947	-1104.3
0.948	-1104.8							1.896	-1059.3	0.948	-1064.7	0.948	-1068.5	0.948	-1073.4	0.948	-1076.4	0.948	-1080.8	0.948	-1082.1	0.948	-1088.5	0.948	-1096.4	0.948	-1100.3	0.948	-1104.8
0.949	-1104.7							1.898	-1059.2	0.949	-1064.8	0.949	-1068.4	0.949	-1073.5	0.949	-1075.9	0.949	-1080.8	0.949	-1082.5	0.949	-1087.7	0.949	-1095.9	0.949	-1100.2	0.949	-1104.7
0.95	-1104.7							1.9	-1059	0.95	-1064.5	0.95	-1068.9	0.95	-1074.1	0.95	-1076.4	0.95	-1080.9	0.95	-1082	0.95	-1088.7	0.95	-1096.6	0.95	-1100.5	0.95	-1104.7
0.951	-1104.7							1.902	-1059	0.951	-1064.9	0.951	-1068.2	0.951	-1073.5	0.951	-1075.8	0.951	-1081.4	0.951	-1082.5	0.951	-1088.4	0.951	-1095.8	0.951	-1099.8	0.951	-1104.7
0.952	-1104.9							1.904	-1059.4	0.952	-1065.3	0.952	-1069.2	0.952	-1073.3	0.952	-1076.3	0.952	-1080.3	0.952	-1082.5	0.952	-1088.3	0.952	-1096.5	0.952	-1100.6	0.952	-1104.9
0.953	-1105							1.906	-1060.1	0.953	-1065.5	0.953	-1068.4	0.953	-1073.1	0.953	-1076.1	0.953	-1078.3	0.953	-1083.4	0.953	-1088.7	0.953	-1096.9	0.953	-1100.5	0.953	-1105
0.954	-1105.9							1.908	-1060.1	0.954	-1065.4	0.954	-1068.6	0.954	-1073.7	0.954	-1076.4	0.954	-1079.3	0.954	-1082.6	0.954	-1088.7	0.954	-1097.3	0.954	-1100.6	0.954	-1105.9
0.955	-1105.4							1.91	-1059.4	0.955	-1065.8	0.955	-1068.7	0.955	-1073.9	0.955	-1076.1	0.955	-1078.4	0.955	-1082.7	0.955	-1089	0.955	-1096.9	0.955	-1100.2	0.955	-1105.4
0.956	-1105.9							1.912	-1059.6	0.956	-1065.9	0.956	-1069.4	0.956	-1074.7	0.956	-1077	0.956	-1079.5	0.956	-1082.5	0.956	-1088.3	0.956	-1097.5	0.956	-1100.3	0.956	-1105.9
0.957	-1105.9							1.914	-1059	0.957	-1065.7	0.957	-1067.2	0.957	-1074.3	0.957	-1075.5	0.957	-1079.1	0.957	-1083.2	0.957	-1088.4	0.957	-1097.1	0.957	-1100.1	0.957	-1105.9
0.958	-1106.4							1.916	-1059.7	0.958	-1066.1	0.958	-1068	0.958	-1074.8	0.958	-1075.9	0.958	-1079.8	0.958	-1083	0.958	-1088.7	0.958	-1097.4	0.958	-1100.3	0.958	-1106.4
0.959	-1105.1							1.918	-1058.8	0.959	-1065.8	0.959	-1067.7	0.959	-1074.5	0.959	-1075.1	0.959	-1078.9	0.959	-1083.7	0.959	-1088.5	0.959	-1097.1	0.959	-1100.4	0.959	-1105.1
0.96	-1105.1							1.92	-1059.8	0.96	-1065.8	0.96	-1068.2	0.96	-1074.6	0.96	-1076.3	0.96	-1079.6	0.96	-1083	0.96	-1088.9	0.96	-1097.7	0.96	-1100.2	0.96	-1105.1
0.961	-1104.4							1.922	-1060.3	0.961	-1065.4	0.961	-1068	0.961	-1074.2	0.961	-1075.6	0.961	-1079.5	0.961	-1082.3	0.961	-1089.1	0.961	-1097.5	0.961	-1100.2	0.961	-1104.4
0.962	-1105.8							1.924	-1059.4	0.962	-1065.5	0.962	-1068.3	0.962	-1074.4	0.962	-1075.4	0.962	-1079.9	0.962	-1081.8	0.962	-1090	0.962	-1097.5	0.962	-1100.9	0.962	-1105.8
0.963	-1105.6							1.926	-1059.9	0.963	-1064.3	0.963	-1068.1	0.963	-1073.3	0.963	-1076.1	0.963	-1079.7	0.963	-1082.7	0.963	-1089.8	0.963	-1097.1	0.963	-1101	0.963	-1105.6
0.964	-1105.6							1.928	-1059.9	0.964	-1065.1	0.964	-1069.2	0.964	-1073.9	0.964	-1076.2	0.964	-1080	0.964	-1082.4	0.964	-1090.4	0.964	-1097.5	0.964	-1101.5	0.964	-1105.6
0.965	-1105.3							1.93	-1060	0.965	-1064.8	0.965	-1069.1	0.965	-1073.3	0.965	-1076.6	0.965	-1079.6	0.965	-1082.3	0.965	-1090.3	0.965	-1097.6	0.965	-1101.4	0.965	-1105.3
0.966	-1105.8							1.932	-1059.5	0.966	-1065.1	0.966	-1068.9	0.966	-1073.9	0.966	-1075.8	0.966	-1080.4	0.966	-1082.2	0.966	-1091	0.966	-1097.4	0.966	-1102.2	0.966	-1105.8
0.967	-1105.2							1.934	-1059.6	0.967	-1065.1	0.967	-1069.1	0.967	-1073.1	0.967	-1075.2	0.967	-1080.4	0.967	-1082.2	0.967	-1090.8	0.967	-1097.7	0.967	-1101.1	0.967	-1105.2
0.968	-1106.2							1.936	-1060.5	0.968	-1064.9	0.968	-1068.5	0.968	-1073	0.968	-1075	0.968	-1081.4	0.968	-1082.1	0.968	-1091.1	0.968	-1097.6	0.968	-1101.2	0.968	-1106.2
0.969	-1106.4							1.938	-1060.1	0.969	-1065.2	0.969	-1068.5	0.969	-1073.3	0.969	-1075.3	0.969	-1080.8	0.969	-1082.2	0.969	-1092.1	0.969	-1098	0.969	-1100.9	0.969	-1106.4
0.97	-1107.4							1.94	-1060	0.97	-1065.2	0.97	-1069.6	0.97	-1073.3	0.97	-1075.6	0.97	-1081.4	0.97	-1082	0.97	-1092.5	0.97	-1098.4	0.97	-1101.4	0.97	-1107.4
0.971	-1107.2							1.942	-1059.7	0.971	-1064.9	0.971	-1068.3	0.971	-1072.9	0.971	-1075.9	0.971	-1080.7	0.971	-1081.9	0.971	-1092	0.971	-1097.7	0.971	-1101	0.971	-1107.2
0.972	-1107.9							1.944	-1059.8	0.972	-1064.9	0.972	-1068.9	0.972	-1073.2	0.972	-1076.1	0.972	-1081.4	0.972	-1081.9	0.972	-1092.2	0.972	-1098.4	0.972	-1101.5	0.972	-1107.9
0.973	-1107.8							1.946	-1060.1	0.973	-1065.2	0.973	-1067.7	0.973	-1073.1	0.973	-1076	0.973	-1080.7	0.973	-1082.2	0.973	-1091.7	0.973	-1098.4	0.973	-1100.5	0.973	-1107.8
0.974	-1107.9							1.948	-1060.9	0.974	-1064.9	0.974	-1068.8	0.974	-1073.5	0.974	-1076	0.974	-1080.8	0.974	-1082.4	0.974	-1092.6	0.974	-1098.4	0.974	-1101.3	0.974	-1107.9
0.975	-1107.8							1.95	-1061.4	0.975	-1064.6	0.975	-1068.4	0.975	-1073.1	0.975	-1076.1	0.975	-1081.4	0.975	-1081.9	0.975	-1092.6	0.975	-1097.8	0.975	-1101.3	0.975	-1107.8
0.976	-1107.2							1.952	-1060.9	0.976	-1065.6	0.976	-1068.7	0.976	-1073.7	0.976	-1076.2	0.976	-1081.3	0.976	-1082.3	0.976	-1092.7	0.976	-1098	0.976	-1101.5	0.976	-1107.2
0.977	-1106.5							1.954	-1061.2	0.977	-1064.9	0.977	-1067.8	0.977	-1073.4	0.977	-1076.2	0.977	-1081.2	0.977	-1083.3	0.977	-1092.5	0.977	-1098.2	0.977	-1101.1	0.977	-1106.5
0.978	-1106.7							1.956	-1058.4	0.978	-1064.7	0.978	-1068.7	0.978	-1073.9	0.978	-1076.1	0.978	-1082.1	0.978	-1082.6	0.978	-1092.9	0.978	-1098.6	0.978	-1101.6	0.978	-1106.7
0.979	-1107.2							1.958	-1059	0.979	-1064.4	0.979	-1068	0.979	-1073.9	0.979	-1076	0.979	-1081.7	0.979	-1082.8	0.979	-1092.6	0.979	-1098.3	0.979	-1101.6	0.979	-1107.2
0.98	-1106.2							1.96	-1059.6	0.98	-1064.8	0.98	-1068.4	0.98	-1073.6	0.98	-1076.3	0.98	-1081.9	0.98	-1082.5	0.98	-1092.3	0.98	-1098.5	0.98	-1101.6	0.98	-1106.2
0.981	-1106.4							1.962	-1059.3	0.981	-1064.8	0.981	-1067.8	0.981	-1073.1	0.981	-1076.1	0.981	-1081.7	0.981	-1082.1	0.981	-1091.6	0.981	-1097.5	0.981	-1101.7	0.981	-1106.4
0.982	-1106							1.964	-1060.3	0.982	-1064.9	0.982	-1068.9	0.982	-1073.6	0.982	-1076.1	0.982	-1081.4	0.982	-1082.5	0.982	-1092	0.982	-1097.4	0.982	-1101.8	0.982	-1106
0.983	-1107							1.966	-1060.7	0.983	-1064.9	0.983	-1068.2	0.983	-1073.3	0.983	-1076.1	0.983	-1081.5	0.983	-1082.7	0.983	-1092.4	0.983	-1097.5	0.983	-1101.6	0.983	-1107
0.984	-1107.5							1.968	-1060.7	0.984	-1065.4	0.984	-1068.4	0.984	-1073.5	0.984	-1076	0.984	-1081.2	0.984	-1082.5	0.984	-1092.1	0.984	-1098	0.984	-1101.9	0.984	-1107.5
0.985	-1107.5							1.97	-1061.1	0.985	-1065	0.985	-1067.6	0.985	-1073	0.985	-1076	0.985	-1080.8	0.985	-1083.5	0.985	-1092.5	0.985	-1097.4	0.985	-1101.6	0.985	-1107.5
0.986	-1107.8							1.972	-1061.2	0.986	-1065.4	0.986	-1067.4	0.986	-1073.9	0.986	-1076.4	0.986	-1081.2	0.986	-1082.8	0.986	-1092.9	0.986	-1098.3	0.986	-1102.2	0.986	-1107.8
0.987	-1107.5							1.974	-1061.1	0.987	-1065.4	0.987	-1067.5	0.987	-1073.6	0.987	-1075.8	0.987	-1080.9	0.987	-1083.3	0.987	-1092.1	0.987	-1097.4	0.987	-1102.4	0.987	-1107.5
0.988	-1107.4							1.976	-1061	0.988	-1066	0.988	-1067.9	0.988	-1073.8	0.988	-1075.7	0.988	-1081.1	0.988	-1083.2	0.988	-1092.9	0.988	-1097.9	0.988	-1102.5	0.988	-1107.4
0.989	-1107.5							1.978	-1060.8	0.989	-1065.5	0.989	-1067.7	0.989	-1073.2	0.989	-1075.3	0.989	-1081.9	0.989	-1083.5	0.989	-1092.6	0.989	-1097.8	0.989	-1101.9	0.989	-1107.5
0.99	-1108.6							1.98	-1060.9	0.99	-1066	0.99	-1068.3	0.99	-1073.7	0.99	-1076.3	0.99	-1082.4	0.99	-1083.3	0.99	-1093.1	0.99	-1097.9	0.99	-1102	0.99	-1108.6
0.991	-1108.5							1.982	-1060.9	0.991	-1065.4	0.991	-1067.4	0.991	-1073.6	0.991	-1076.2	0.991	-1081.7	0.991	-1083.5	0.991	-1092.6	0.991	-1097.6	0.991	-1102	0.991	-1108.5
0.992	-1108.2							1.984	-1060.2	0.992	-1065.8	0.992	-1067.9	0.992	-1073.9	0.992	-1076.5	0.992	-1082.3	0.992	-1083.7	0.992	-1092.9	0.992	-1096.8	0.992	-1101.2	0.992	-1108.2
0.993	-1108.7							1.986	-1060.1	0.993	-1065.2	0.993	-1067.6	0.993	-1073.4	0.993	-1076.7	0.993	-1082.4	0.993	-1083.8	0.993	-1093.4	0.993	-1097	0.993	-1101.9	0.993	-1108.7
0.994	-1108.7							1.988	-1059.7	0.994	-1065	0.994	-1068.2	0.994	-1074	0.994	-1077.2	0.994	-1082.1	0.994	-1083.5	0.994	-1093.3	0.994	-1096.4	0.994	-1101.7	0.994	-1108.7
0.995	-1108.9							1.99	-1059.6	0.995	-1064.8	0.995	-1068	0.995	-1073.9	0.995	-1076.5	0.995	-1081.9	0.995	-1083.3	0.995	-1093.4	0.995	-1097.2	0.995	-1101.6	0.995	-1108.9
0.996	-1108.3							1.992	-1061.1	0.996	-1065.4	0.996	-1068.6	0.996	-1073.9	0.996	-1077	0.996	-1081.9	0.996	-1084.7	0.996	-1094.2	0.996	-1097.7	0.996	-1101.8	0.996	-1108.3
0.997	-1108							1.994	-1059.2	0.997	-1065.5	0.997	-1068.1	0.997	-1073.7	0.997	-1076.4	0.997	-1081.9	0.997	-1084.6	0.997	-1093.2	0.997	-1097.7	0.997	-1101.6	0.997	-1108
0.998	-1108							1.996	-1058.5	0.998	-1065.3	0.998	-1067.5	0.998	-1073.6	0.998	-1077	0.998	-1081.5	0.998	-1083.9	0.998	-1094	0.998	-1098	0.998	-1102	0.998	-1108
0.999	-1107.9							1.998	-1059.2	0.999	-1065.4	0.999	-1067.8	0.999	-1073.1	0.999	-1076.8	0.999	-1080.8	0.999	-1084.4	0.999	-1093.8	0.999	-1097.9	0.999	-1102	0.999	-1107.9
1	-1108.1							2	-1058.8	1	-1065.6	1	-1067.8	1	-1073.5	1	-1077.1	1	-1080.3	1	-1084.1	1	-1093.9	1	-1098.3	1	-1102.3	1	-1108.1
1.001	-1108.1							2.002	-1058.4	1.001	-1065.4	1.001	-1067.9	1.001	-1073.3	1.001	-1076.6	1.001	-1080.1	1.001	-1084.2	1.001	-1093.3	1.001	-1097.7	1.001	-1102.8	1.001	-1108.1
1.002	-1108							2.004	-1058.7	1.002	-1065.9	1.002	-1068.3	1.002	-1073	1.002	-1077.4	1.002	-1080.6	1.002	-1083.8	1.002	-1094	1.002	-1098.5	1.002	-1102.9	1.002	-1108
1.003	-1108.1							2.006	-1059.3	1.003	-1065.6	1.003	-1068.1	1.003	-1073.6	1.003	-1077	1.003	-1080	1.003	-1083.5	1.003	-1094.3	1.003	-1098.1	1.003	-1102.7	1.003	-1108.1
1.004	-1108							2.008	-1059.4	1.004	-1065.3	1.004	-1068.3	1.004	-1073.2	1.004	-1076.9	1.004	-1080.3	1.004	-1083.1	1.004	-1095.3	1.004	-1098.7	1.004	-1102.5	1.004	-1108
1.005	-1107.7							2.01	-1059.5	1.005	-1065.7	1.005	-1067.9	1.005	-1073.4	1.005	-1077.1	1.005	-1080.2	1.005	-1083.5	1.005	-1094.1	1.005	-1098.3	1.005	-1102.3	1.005	-1107.7
1.006	-1108.2							2.012	-1060.4	1.006	-1065.5	1.006	-1068.3	1.006	-1073.3	1.006	-1076.8	1.006	-1080.3	1.006	-1083.1	1.006	-1094.4	1.006	-1098.7	1.006	-1103.1	1.006	-1108.2
1.007	-1108							2.014	-1060.2	1.007	-1065.8	1.007	-1068	1.007	-1073.6	1.007	-1076.5	1.007	-1079.7	1.007	-1083.4	1.007	-1093.8	1.007	-1099.2	1.007	-1103.4	1.007	-1108
1.008	-1108.2							2.016	-1060.6	1.008	-1065.7	1.008	-1067.4	1.008	-1073.3	1.008	-1077	1.008	-1080.3	1.008	-1083.2	1.008	-1094.4	1.008	-1099.1	1.008	-1103	1.008	-1108.2
1.009	-1108							2.018	-1058.4	1.009	-1065.4	1.009	-1067.7	1.009	-1073.2	1.009	-1076.3	1.009	-1080.1	1.009	-1083.3	1.009	-1093.7	1.009	-1098.5	1.009	-1103.5	1.009	-1108
1.01	-1108.8							2.02	-1058.5	1.01	-1065.7	1.01	-1068.3	1.01	-1073.7	1.01	-1076.1	1.01	-1080.3	1.01	-1083.8	1.01	-1094.4	1.01	-1099.1	1.01	-1103.7	1.01	-1108.8
1.011	-1107.5							2.022	-1057.9	1.011	-1065.7	1.011	-1067.9	1.011	-1073.9	1.011	-1076.6	1.011	-1080.1	1.011	-1083.4	1.011	-1094.4	1.011	-1098.7	1.011	-1103	1.011	-1107.5
1.012	-1108.5							2.024	-1056.7	1.012	-1065.4	1.012	-1068.1	1.012	-1073.5	1.012	-1076.6	1.012	-1080.7	1.012	-1083.1	1.012	-1094.9	1.012	-1097.2	1.012	-1102.9	1.012	-1108.5
1.013	-1108.2							2.026	-1057.6	1.013	-1065.3	1.013	-1067.4	1.013	-1073.4	1.013	-1076.8	1.013	-1080.1	1.013	-1084.1	1.013	-1094.4	1.013	-1097.1	1.013	-1102.9	1.013	-1108.2
1.014	-1108.5							2.028	-1058.1	1.014	-1064.8	1.014	-1068.1	1.014	-1073.8	1.014	-1076.8	1.014	-1081.4	1.014	-1083.6	1.014	-1094.2	1.014	-1097.4	1.014	-1103.2	1.014	-1108.5
1.015	-1107.9							2.03	-1059.3	1.015	-1064.3	1.015	-1067.5	1.015	-1073.4	1.015	-1076.4	1.015	-1081	1.015	-1084.6	1.015	-1094.3	1.015	-1097.5	1.015	-1103.2	1.015	-1107.9
1.016	-1108.6							2.032	-1058.4	1.016	-1064.9	1.016	-1067.8	1.016	-1073.5	1.016	-1077	1.016	-1081.6	1.016	-1084.6	1.016	-1093.5	1.016	-1098.2	1.016	-1102.6	1.016	-1108.6
1.017	-1107.6							2.034	-1059.4	1.017	-1064.8	1.017	-1067.9	1.017	-1073	1.017	-1076.2	1.017	-1080.7	1.017	-1085.9	1.017	-1093.4	1.017	-1097.6	1.017	-1103.2	1.017	-1107.6
1.018	-1107.9							2.036	-1058.9	1.018	-1064.6	1.018	-1067.3	1.018	-1073.3	1.018	-1076	1.018	-1080.3	1.018	-1085.7	1.018	-1093.9	1.018	-1097.7	1.018	-1103.8	1.018	-1107.9
1.019	-1108.3							2.038	-1059.2	1.019	-1064.3	1.019	-1066.9	1.019	-1073	1.019	-1074.9	1.019	-1080.8	1.019	-1085.1	1.019	-1093.5	1.019	-1097.9	1.019	-1102.8	1.019	-1108.3
1.02	-1108.2							2.04	-1059.3	1.02	-1064	1.02	-1067	1.02	-1073.2	1.02	-1075.4	1.02	-1080.8	1.02	-1085.3	1.02	-1094	1.02	-1097.9	1.02	-1103	1.02	-1108.2
1.021	-1108							2.042	-1059	1.021	-1063.5	1.021	-1066.9	1.021	-1073.2	1.021	-1074.8	1.021	-1081	1.021	-1085.3	1.021	-1093.8	1.021	-1097.7	1.021	-1102.9	1.021	-1108
1.022	-1108.6							2.044	-1059.5	1.022	-1063.9	1.022	-1067	1.022	-1073.6	1.022	-1075.2	1.022	-1081.3	1.022	-1085.2	1.022	-1094	1.022	-1098.6	1.022	-1103.1	1.022	-1108.6
1.023	-1109							2.046	-1060.3	1.023	-1063.7	1.023	-1066.5	1.023	-1072.8	1.023	-1075.3	1.023	-1081.3	1.023	-1085.7	1.023	-1093.6	1.023	-1098.8	1.023	-1103.2	1.023	-1109
1.024	-1108.9							2.048	-1060	1.024	-1063.7	1.024	-1067	1.024	-1072.7	1.024	-1076	1.024	-1081.9	1.024	-1086.1	1.024	-1093.8	1.024	-1099.1	1.024	-1103.4	1.024	-1108.9
1.025	-1108.9							2.05	-1059.8	1.025	-1063.9	1.025	-1066.8	1.025	-1072.4	1.025	-1075.2	1.025	-1081.2	1.025	-1085.9	1.025	-1093.5	1.025	-1099.2	1.025	-1103.6	1.025	-1108.9
1.026	-1109							2.052	-1058.2	1.026	-1063.4	1.026	-1066.6	1.026	-1072.7	1.026	-1075.1	1.026	-1081.9	1.026	-1086	1.026	-1093.8	1.026	-1099	1.026	-1103.6	1.026	-1109
1.027	-1109.6							2.054	-1058.2	1.027	-1063.6	1.027	-1066.3	1.027	-1072.4	1.027	-1075.3	1.027	-1082	1.027	-1085.9	1.027	-1093.4	1.027	-1099.3	1.027	-1103.7	1.027	-1109.6
1.028	-1109.4							2.056	-1057.5	1.028	-1065	1.028	-1066.5	1.028	-1072.5	1.028	-1075.1	1.028	-1082.4	1.028	-1086.3	1.028	-1094.2	1.028	-1100.1	1.028	-1104.3	1.028	-1109.4
1.029	-1109.6							2.058	-1057.6	1.029	-1063.5	1.029	-1066	1.029	-1071.8	1.029	-1075.3	1.029	-1081.9	1.029	-1086.1	1.029	-1094.1	1.029	-1099.5	1.029	-1103.8	1.029	-1109.6
1.03	-1110.2							2.06	-1058.7	1.03	-1064.4	1.03	-1066.7	1.03	-1071.7	1.03	-1074.9	1.03	-1082.3	1.03	-1086.3	1.03	-1093.4	1.03	-1098.7	1.03	-1104.5	1.03	-1110.2
1.031	-1110							2.062	-1059.3	1.031	-1064.7	1.031	-1067	1.031	-1071.7	1.031	-1075.1	1.031	-1082.1	1.031	-1085.9	1.031	-1093	1.031	-1099.2	1.031	-1104.6	1.031	-1110
1.032	-1110.4							2.064	-1059.4	1.032	-1064.6	1.032	-1067.1	1.032	-1071.6	1.032	-1075	1.032	-1082.5	1.032	-1086.5	1.032	-1093.4	1.032	-1098.8	1.032	-1105.1	1.032	-1110.4
1.033	-1110.4							2.066	-1059.6	1.033	-1064.4	1.033	-1067	1.033	-1071.2	1.033	-1075	1.033	-1083.1	1.033	-1086.7	1.033	-1093.3	1.033	-1099.6	1.033	-1104.8	1.033	-1110.4
1.034	-1111.3							2.068	-1060.1	1.034	-1064.8	1.034	-1067.4	1.034	-1071.2	1.034	-1075.3	1.034	-1083	1.034	-1086.4	1.034	-1093.5	1.034	-1099.1	1.034	-1105	1.034	-1111.3
1.035	-1111.7							2.07	-1060.4	1.035	-1064.7	1.035	-1067.2	1.035	-1071	1.035	-1074.5	1.035	-1083.1	1.035	-1087.2	1.035	-1093.6	1.035	-1099.5	1.035	-1105.4	1.035	-1111.7
1.036	-1111.3							2.072	-1061.3	1.036	-1065.1	1.036	-1067.5	1.036	-1070.5	1.036	-1075	1.036	-1084	1.036	-1087.2	1.036	-1093.5	1.036	-1099.4	1.036	-1105.3	1.036	-1111.3
1.037	-1111.5							2.074	-1059.3	1.037	-1064.8	1.037	-1067.5	1.037	-1070.8	1.037	-1074.6	1.037	-1084.1	1.037	-1086.7	1.037	-1094	1.037	-1099.7	1.037	-1105.3	1.037	-1111.5
1.038	-1111.5							2.076	-1059.1	1.038	-1064.7	1.038	-1067.7	1.038	-1070.5	1.038	-1075.1	1.038	-1083.9	1.038	-1087.1	1.038	-1094.4	1.038	-1099.6	1.038	-1105.5	1.038	-1111.5
1.039	-1111.2							2.078	-1058.6	1.039	-1064.5	1.039	-1068.7	1.039	-1070.9	1.039	-1074.5	1.039	-1082.1	1.039	-1086.7	1.039	-1093.4	1.039	-1099.6	1.039	-1105.9	1.039	-1111.2
1.04	-1111.2							2.08	-1057.9	1.04	-1064.8	1.04	-1068.8	1.04	-1070.7	1.04	-1074.5	1.04	-1082.4	1.04	-1086.7	1.04	-1093.5	1.04	-1099.8	1.04	-1105.8	1.04	-1111.2
1.041	-1111.1							2.082	-1058.4	1.041	-1064.3	1.041	-1068.8	1.041	-1071.3	1.041	-1073.9	1.041	-1082	1.041	-1086.5	1.041	-1093.8	1.041	-1100	1.041	-1105.9	1.041	-1111.1
1.042	-1111.5							2.084	-1058.8	1.042	-1064.3	1.042	-1069.1	1.042	-1071	1.042	-1074.4	1.042	-1082.9	1.042	-1086.8	1.042	-1093.9	1.042	-1099.7	1.042	-1105	1.042	-1111.5
1.043	-1111.4							2.086	-1058.7	1.043	-1064.5	1.043	-1069.2	1.043	-1071.1	1.043	-1074	1.043	-1082.8	1.043	-1086.5	1.043	-1094.2	1.043	-1099.6	1.043	-1105.4	1.043	-1111.4
1.044	-1111.1							2.088	-1059.1	1.044	-1064.1	1.044	-1068.8	1.044	-1071.2	1.044	-1074.4	1.044	-1082.6	1.044	-1087	1.044	-1094.3	1.044	-1099.5	1.044	-1106	1.044	-1111.1
1.045	-1111.7							2.09	-1058.9	1.045	-1063.8	1.045	-1069	1.045	-1071.1	1.045	-1074.3	1.045	-1082.7	1.045	-1086.9	1.045	-1094.2	1.045	-1099.9	1.045	-1106	1.045	-1111.7
1.046	-1111.3							2.092	-1059	1.046	-1064.7	1.046	-1069	1.046	-1070.7	1.046	-1074.5	1.046	-1082.5	1.046	-1087.4	1.046	-1094.9	1.046	-1100	1.046	-1106.2	1.046	-1111.3
1.047	-1111.3							2.094	-1058.3	1.047	-1063.8	1.047	-1068.6	1.047	-1070.8	1.047	-1074	1.047	-1082.5	1.047	-1086.8	1.047	-1094.9	1.047	-1100.2	1.047	-1106	1.047	-1111.3
1.048	-1112.1							2.096	-1059	1.048	-1063.7	1.048	-1068.1	1.048	-1070.5	1.048	-1074.4	1.048	-1082.2	1.048	-1087.8	1.048	-1095.4	1.048	-1100.5	1.048	-1106.7	1.048	-1112.1
1.049	-1112.5							2.098	-1058.8	1.049	-1064.1	1.049	-1067.8	1.049	-1070.3	1.049	-1073.5	1.049	-1082.7	1.049	-1087.7	1.049	-1095.6	1.049	-1101.1	1.049	-1106.2	1.049	-1112.5
1.05	-1112.3							2.1	-1059	1.05	-1063.8	1.05	-1068.3	1.05	-1070.2	1.05	-1074	1.05	-1082.3	1.05	-1088.4	1.05	-1096.1	1.05	-1100.5	1.05	-1106.5	1.05	-1112.3
1.051	-1112.8							2.102	-1059.2	1.051	-1064	1.051	-1068.3	1.051	-1070	1.051	-1073.9	1.051	-1082.3	1.051	-1088.2	1.051	-1096.8	1.051	-1099.8	1.051	-1106.5	1.051	-1112.8
1.052	-1112.8							2.104	-1058.7	1.052	-1063.4	1.052	-1068	1.052	-1069.7	1.052	-1073.8	1.052	-1081.9	1.052	-1088.3	1.052	-1096.9	1.052	-1100.4	1.052	-1106.8	1.052	-1112.8
1.053	-1112.6							2.106	-1058.7	1.053	-1063.8	1.053	-1065.4	1.053	-1069.6	1.053	-1073.6	1.053	-1082.3	1.053	-1088	1.053	-1096.6	1.053	-1100.7	1.053	-1106.3	1.053	-1112.6
1.054	-1113.3							2.108	-1058.4	1.054	-1063.7	1.054	-1065.4	1.054	-1069.7	1.054	-1073.6	1.054	-1081.9	1.054	-1087.5	1.054	-1097.2	1.054	-1100.5	1.054	-1106.7	1.054	-1113.3
1.055	-1112.9							2.11	-1057.9	1.055	-1064	1.055	-1065.4	1.055	-1069.3	1.055	-1073.6	1.055	-1081.5	1.055	-1087.3	1.055	-1095.8	1.055	-1099.6	1.055	-1106.8	1.055	-1112.9
1.056	-1113.2							2.112	-1058.3	1.056	-1063.7	1.056	-1066.2	1.056	-1069.2	1.056	-1073.9	1.056	-1080.8	1.056	-1087.4	1.056	-1095.7	1.056	-1100.1	1.056	-1107.1	1.056	-1113.2
1.057	-1113.3							2.114	-1058.4	1.057	-1063.3	1.057	-1067	1.057	-1069.6	1.057	-1073.6	1.057	-1080.3	1.057	-1087.9	1.057	-1095.5	1.057	-1100	1.057	-1107.3	1.057	-1113.3
1.058	-1113.5							2.116	-1057.8	1.058	-1063.9	1.058	-1066.3	1.058	-1069.1	1.058	-1073	1.058	-1080.4	1.058	-1088.2	1.058	-1095.6	1.058	-1100.2	1.058	-1107.3	1.058	-1113.5
1.059	-1113.3							2.118	-1059	1.059	-1063.9	1.059	-1066.6	1.059	-1069.5	1.059	-1072.7	1.059	-1079.7	1.059	-1088.5	1.059	-1096.4	1.059	-1100.5	1.059	-1107.5	1.059	-1113.3
1.06	-1113.4							2.12	-1059.2	1.06	-1063.8	1.06	-1067.7	1.06	-1069.2	1.06	-1073.4	1.06	-1078.8	1.06	-1087.5	1.06	-1096.4	1.06	-1101.1	1.06	-1107.6	1.06	-1113.4
1.061	-1113.6							2.122	-1060.2	1.061	-1063.7	1.061	-1067.6	1.061	-1069.4	1.061	-1072.9	1.061	-1078.8	1.061	-1088.3	1.061	-1095.2	1.061	-1101.4	1.061	-1107.5	1.061	-1113.6
1.062	-1113.4							2.124	-1058.5	1.062	-1064	1.062	-1066.7	1.062	-1068.8	1.062	-1073.7	1.062	-1078.6	1.062	-1088.5	1.062	-1095.5	1.062	-1101	1.062	-1107.6	1.062	-1113.4
1.063	-1113.7							2.126	-1058.6	1.063	-1064.1	1.063	-1065.7	1.063	-1069.1	1.063	-1073.6	1.063	-1078.7	1.063	-1088.4	1.063	-1095.4	1.063	-1100.3	1.063	-1107.8	1.063	-1113.7
1.064	-1112.8							2.128	-1058.2	1.064	-1063.9	1.064	-1066.2	1.064	-1068.7	1.064	-1073.9	1.064	-1077.9	1.064	-1088	1.064	-1095.7	1.064	-1100.4	1.064	-1107.6	1.064	-1112.8
1.065	-1112.5							2.13	-1059	1.065	-1064	1.065	-1065.8	1.065	-1068.6	1.065	-1073.3	1.065	-1077.4	1.065	-1088.1	1.065	-1095.9	1.065	-1100	1.065	-1107.6	1.065	-1112.5
1.066	-1112.6							2.132	-1059	1.066	-1064.2	1.066	-1066.1	1.066	-1068.7	1.066	-1073	1.066	-1078.5	1.066	-1088.1	1.066	-1096.2	1.066	-1100.8	1.066	-1107.7	1.066	-1112.6
1.067	-1112.8							2.134	-1059.2	1.067	-1064.2	1.067	-1065.9	1.067	-1068.5	1.067	-1073.1	1.067	-1078.2	1.067	-1087.2	1.067	-1096.1	1.067	-1100.6	1.067	-1107.4	1.067	-1112.8
1.068	-1113.1							2.136	-1059.2	1.068	-1064.1	1.068	-1066.6	1.068	-1068.7	1.068	-1072.8	1.068	-1078.4	1.068	-1087.3	1.068	-1096	1.068	-1100.5	1.068	-1107.2	1.068	-1113.1
1.069	-1113.5							2.138	-1059.7	1.069	-1064	1.069	-1065.9	1.069	-1069	1.069	-1072.6	1.069	-1078.2	1.069	-1087.8	1.069	-1095.3	1.069	-1100.8	1.069	-1107.1	1.069	-1113.5
1.07	-1113.8							2.14	-1060.4	1.07	-1063.9	1.07	-1066.3	1.07	-1069.2	1.07	-1072	1.07	-1078.3	1.07	-1087.4	1.07	-1094.9	1.07	-1101.4	1.07	-1107	1.07	-1113.8
1.071	-1113.9							2.142	-1058.8	1.071	-1064.2	1.071	-1066	1.071	-1069.2	1.071	-1072.3	1.071	-1078.3	1.071	-1087.8	1.071	-1095.6	1.071	-1101.3	1.071	-1107	1.071	-1113.9
1.072	-1113.2							2.144	-1059.7	1.072	-1064.8	1.072	-1066.5	1.072	-1069.1	1.072	-1072.3	1.072	-1078.7	1.072	-1088	1.072	-1095.4	1.072	-1101.5	1.072	-1106.9	1.072	-1113.2
1.073	-1113.2							2.146	-1059.7	1.073	-1065.2	1.073	-1066.5	1.073	-1069.6	1.073	-1071.2	1.073	-1078.8	1.073	-1088.2	1.073	-1095.5	1.073	-1101.4	1.073	-1106.9	1.073	-1113.2
1.074	-1113							2.148	-1058.5	1.074	-1065.1	1.074	-1066.7	1.074	-1069.6	1.074	-1071.3	1.074	-1078.7	1.074	-1087.9	1.074	-1095.8	1.074	-1101.8	1.074	-1107.1	1.074	-1113
1.075	-1112.8							2.15	-1059.2	1.075	-1064.8	1.075	-1066.8	1.075	-1068.8	1.075	-1071.7	1.075	-1079	1.075	-1087.7	1.075	-1096.1	1.075	-1100.9	1.075	-1107.1	1.075	-1112.8
1.076	-1112.5							2.152	-1059.1	1.076	-1064.7	1.076	-1066.4	1.076	-1069.2	1.076	-1071.8	1.076	-1079.1	1.076	-1087.7	1.076	-1096.7	1.076	-1101.5	1.076	-1108.1	1.076	-1112.5
1.077	-1113.3							2.154	-1059.3	1.077	-1066	1.077	-1067	1.077	-1069.4	1.077	-1071.3	1.077	-1079.3	1.077	-1087.2	1.077	-1096.1	1.077	-1100.9	1.077	-1107.5	1.077	-1113.3
1.078	-1112.8							2.156	-1059	1.078	-1065.7	1.078	-1066.2	1.078	-1069.3	1.078	-1071.2	1.078	-1079.3	1.078	-1086.7	1.078	-1096.2	1.078	-1101.3	1.078	-1108	1.078	-1112.8
1.079	-1113.7							2.158	-1058.8	1.079	-1065.9	1.079	-1066.6	1.079	-1069.3	1.079	-1071.8	1.079	-1078.9	1.079	-1086.8	1.079	-1096.6	1.079	-1100.9	1.079	-1107.6	1.079	-1113.7
1.08	-1113.1							2.16	-1059.1	1.08	-1062.1	1.08	-1066.1	1.08	-1069	1.08	-1072	1.08	-1078.3	1.08	-1086.6	1.08	-1096.3	1.08	-1101	1.08	-1108	1.08	-1113.1
1.081	-1113.3							2.162	-1059.1	1.081	-1062.3	1.081	-1066.2	1.081	-1069.1	1.081	-1073	1.081	-1078.2	1.081	-1086.2	1.081	-1096.6	1.081	-1101.3	1.081	-1108	1.081	-1113.3
1.082	-1113.7							2.164	-1058.7	1.082	-1062.2	1.082	-1065.9	1.082	-1070	1.082	-1072.5	1.082	-1078.6	1.082	-1086.2	1.082	-1096.5	1.082	-1101.2	1.082	-1107.7	1.082	-1113.7
1.083	-1114.2							2.166	-1059	1.083	-1062.3	1.083	-1066.5	1.083	-1069.7	1.083	-1072.9	1.083	-1078.4	1.083	-1086.1	1.083	-1096.5	1.083	-1100.9	1.083	-1107.2	1.083	-1114.2
1.084	-1113.8							2.168	-1058.5	1.084	-1062.5	1.084	-1066	1.084	-1069.4	1.084	-1073.1	1.084	-1079.2	1.084	-1085.2	1.084	-1096.3	1.084	-1100.6	1.084	-1107.4	1.084	-1113.8
1.085	-1113.7							2.17	-1058.9	1.085	-1063	1.085	-1066	1.085	-1069.2	1.085	-1073.4	1.085	-1079.8	1.085	-1085.4	1.085	-1096.3	1.085	-1100.8	1.085	-1107.4	1.085	-1113.7
1.086	-1113.7							2.172	-1058.4	1.086	-1062.7	1.086	-1066.2	1.086	-1069.2	1.086	-1073.6	1.086	-1079	1.086	-1085	1.086	-1096.3	1.086	-1101	1.086	-1108.2	1.086	-1113.7
1.087	-1114.1							2.174	-1057.8	1.087	-1062.9	1.087	-1066.8	1.087	-1069.1	1.087	-1073.5	1.087	-1078.6	1.087	-1085.1	1.087	-1096.5	1.087	-1101.2	1.087	-1108	1.087	-1114.1
1.088	-1114.1							2.176	-1058.4	1.088	-1063	1.088	-1065.4	1.088	-1068.7	1.088	-1073.5	1.088	-1078	1.088	-1085.5	1.088	-1096.6	1.088	-1101.4	1.088	-1108.1	1.088	-1114.1
1.089	-1113.7							2.178	-1059	1.089	-1063.1	1.089	-1065.7	1.089	-1069.1	1.089	-1073.1	1.089	-1078.3	1.089	-1085.7	1.089	-1096.7	1.089	-1101.3	1.089	-1108.1	1.089	-1113.7
1.09	-1114							2.18	-1058.6	1.09	-1062.9	1.09	-1065.3	1.09	-1069	1.09	-1073.4	1.09	-1078.1	1.09	-1084.9	1.09	-1096.8	1.09	-1101.1	1.09	-1106.7	1.09	-1114
1.091	-1114.1							2.182	-1057.6	1.091	-1062.9	1.091	-1065.2	1.091	-1069.1	1.091	-1073.1	1.091	-1079.2	1.091	-1084.9	1.091	-1096.8	1.091	-1101.5	1.091	-1107	1.091	-1114.1
1.092	-1114.9							2.184	-1057.9	1.092	-1063.7	1.092	-1065.2	1.092	-1069.4	1.092	-1073.7	1.092	-1079.1	1.092	-1084.7	1.092	-1096.3	1.092	-1101.7	1.092	-1107.3	1.092	-1114.9
1.093	-1114.2							2.186	-1057.7	1.093	-1063.9	1.093	-1064.8	1.093	-1069.3	1.093	-1073.2	1.093	-1079.7	1.093	-1085.1	1.093	-1096.2	1.093	-1101.7	1.093	-1107.1	1.093	-1114.2
1.094	-1114.9							2.188	-1056.9	1.094	-1063.8	1.094	-1065.3	1.094	-1069.7	1.094	-1073.3	1.094	-1079.2	1.094	-1084.9	1.094	-1095.9	1.094	-1101.8	1.094	-1107.2	1.094	-1114.9
1.095	-1114.3							2.19	-1056.6	1.095	-1063.8	1.095	-1065	1.095	-1069.6	1.095	-1073.3	1.095	-1079.9	1.095	-1084.2	1.095	-1095.8	1.095	-1101.9	1.095	-1107.6	1.095	-1114.3
1.096	-1114.6							2.192	-1057.3	1.096	-1063.9	1.096	-1065.4	1.096	-1069.7	1.096	-1072.9	1.096	-1079.6	1.096	-1084.5	1.096	-1095.7	1.096	-1102.4	1.096	-1107.4	1.096	-1114.6
1.097	-1115							2.194	-1056.5	1.097	-1063.7	1.097	-1064.9	1.097	-1069.4	1.097	-1073.3	1.097	-1079.8	1.097	-1085.1	1.097	-1096.1	1.097	-1102.2	1.097	-1108	1.097	-1115
1.098	-1114.1							2.196	-1057.2	1.098	-1063.5	1.098	-1064.9	1.098	-1068.9	1.098	-1073.5	1.098	-1079.2	1.098	-1084.3	1.098	-1096.3	1.098	-1102.2	1.098	-1107.7	1.098	-1114.1
1.099	-1114.6							2.198	-1056.7	1.099	-1063.8	1.099	-1064.9	1.099	-1069	1.099	-1072.9	1.099	-1078.7	1.099	-1084.6	1.099	-1096.1	1.099	-1102.6	1.099	-1107.3	1.099	-1114.6
1.1	-1114							2.2	-1057.4	1.1	-1063.5	1.1	-1065.3	1.1	-1069	1.1	-1072.8	1.1	-1078.8	1.1	-1084.4	1.1	-1095.7	1.1	-1102.7	1.1	-1107.5	1.1	-1114
1.101	-1114.2									1.101	-1063.6	1.101	-1064.9	1.101	-1069.1	1.101	-1072.9	1.101	-1078.6	1.101	-1084.6	1.101	-1095.4	1.101	-1102.3	1.101	-1108	1.101	-1114.2
1.102	-1113.7									1.102	-1063.9	1.102	-1064.9	1.102	-1069	1.102	-1073.1	1.102	-1078.8	1.102	-1085.2	1.102	-1095.3	1.102	-1101.8	1.102	-1107.7	1.102	-1113.7
1.103	-1114.3									1.103	-1063.7	1.103	-1065.4	1.103	-1068.6	1.103	-1072.5	1.103	-1078.4	1.103	-1085.1	1.103	-1095.4	1.103	-1102.5	1.103	-1107.9	1.103	-1114.3
1.104	-1114.4									1.104	-1063.8	1.104	-1065.6	1.104	-1069.3	1.104	-1073.5	1.104	-1078.6	1.104	-1085.1	1.104	-1095.4	1.104	-1101.8	1.104	-1107.6	1.104	-1114.4
1.105	-1114.7									1.105	-1064	1.105	-1065.4	1.105	-1069.6	1.105	-1072.2	1.105	-1078.5	1.105	-1085.2	1.105	-1095.1	1.105	-1102.1	1.105	-1108	1.105	-1114.7
1.106	-1114.1									1.106	-1063.2	1.106	-1065.3	1.106	-1069.3	1.106	-1072.4	1.106	-1078.6	1.106	-1086	1.106	-1095.6	1.106	-1101.3	1.106	-1107.6	1.106	-1114.1
1.107	-1113.4									1.107	-1063.7	1.107	-1065.4	1.107	-1068.8	1.107	-1072.6	1.107	-1078.2	1.107	-1085.7	1.107	-1095.5	1.107	-1102.4	1.107	-1108.1	1.107	-1113.4
1.108	-1113.6									1.108	-1063.6	1.108	-1065.6	1.108	-1069.2	1.108	-1072.4	1.108	-1078.2	1.108	-1086.1	1.108	-1096.1	1.108	-1102.4	1.108	-1108.2	1.108	-1113.6
1.109	-1114.4									1.109	-1064.2	1.109	-1065.3	1.109	-1069.3	1.109	-1072.6	1.109	-1078.3	1.109	-1086.4	1.109	-1096.7	1.109	-1103.3	1.109	-1108.2	1.109	-1114.4
1.11	-1113.6									1.11	-1063.3	1.11	-1064.9	1.11	-1069.4	1.11	-1072.2	1.11	-1078.6	1.11	-1086.8	1.11	-1096.9	1.11	-1103.5	1.11	-1108.3	1.11	-1113.6
1.111	-1112.8									1.111	-1063.7	1.111	-1065.2	1.111	-1069.9	1.111	-1072.3	1.111	-1078.8	1.111	-1086.2	1.111	-1096.5	1.111	-1103.3	1.111	-1107.5	1.111	-1112.8
1.112	-1112.9									1.112	-1063.4	1.112	-1065.9	1.112	-1070	1.112	-1072.2	1.112	-1079.7	1.112	-1086.3	1.112	-1096.7	1.112	-1103.4	1.112	-1107.6	1.112	-1112.9
1.113	-1112.8									1.113	-1063.7	1.113	-1065.6	1.113	-1070.4	1.113	-1072.4	1.113	-1079.3	1.113	-1086.7	1.113	-1096.9	1.113	-1103.7	1.113	-1107.9	1.113	-1112.8
1.114	-1113.2									1.114	-1063.3	1.114	-1065.6	1.114	-1070.1	1.114	-1072.4	1.114	-1078.9	1.114	-1086.4	1.114	-1097	1.114	-1103.3	1.114	-1108	1.114	-1113.2
1.115	-1113.2									1.115	-1063.8	1.115	-1065.5	1.115	-1070.2	1.115	-1072.7	1.115	-1078.7	1.115	-1086.3	1.115	-1096.7	1.115	-1103	1.115	-1107.9	1.115	-1113.2
1.116	-1113.5									1.116	-1063.4	1.116	-1065.5	1.116	-1070.2	1.116	-1072.7	1.116	-1078.8	1.116	-1086.3	1.116	-1097.1	1.116	-1103.1	1.116	-1108.3	1.116	-1113.5
1.117	-1113.8									1.117	-1063.6	1.117	-1065.5	1.117	-1069.9	1.117	-1072.7	1.117	-1078.7	1.117	-1086.5	1.117	-1096.7	1.117	-1102.9	1.117	-1108.4	1.117	-1113.8
1.118	-1113.9									1.118	-1063.7	1.118	-1065.8	1.118	-1070.4	1.118	-1073.1	1.118	-1079.2	1.118	-1086.3	1.118	-1096.4	1.118	-1102.8	1.118	-1108.4	1.118	-1113.9
1.119	-1114									1.119	-1063.7	1.119	-1065.3	1.119	-1070.2	1.119	-1073.6	1.119	-1079.4	1.119	-1085.7	1.119	-1096.3	1.119	-1103.2	1.119	-1108.6	1.119	-1114
1.12	-1114.2									1.12	-1063.3	1.12	-1065.3	1.12	-1069.5	1.12	-1073.5	1.12	-1079.3	1.12	-1085.9	1.12	-1095.7	1.12	-1102.7	1.12	-1108.6	1.12	-1114.2
1.121	-1114.4									1.121	-1063.7	1.121	-1065.7	1.121	-1069.9	1.121	-1073.6	1.121	-1079.2	1.121	-1086.2	1.121	-1095.4	1.121	-1102.6	1.121	-1108.9	1.121	-1114.4
1.122	-1114.2									1.122	-1063.4	1.122	-1065.2	1.122	-1069.8	1.122	-1073.7	1.122	-1079.8	1.122	-1085.8	1.122	-1095.8	1.122	-1102.7	1.122	-1108.6	1.122	-1114.2
1.123	-1113.8									1.123	-1063.5	1.123	-1065.3	1.123	-1069.8	1.123	-1073.9	1.123	-1079.8	1.123	-1086.1	1.123	-1095.4	1.123	-1102.4	1.123	-1109.1	1.123	-1113.8
1.124	-1114.3									1.124	-1063.3	1.124	-1065.9	1.124	-1070.4	1.124	-1073.7	1.124	-1079.7	1.124	-1086	1.124	-1096.2	1.124	-1102.4	1.124	-1109	1.124	-1114.3
1.125	-1114.4									1.125	-1063.3	1.125	-1065.8	1.125	-1069.9	1.125	-1073.8	1.125	-1080	1.125	-1085.8	1.125	-1095.4	1.125	-1102.6	1.125	-1108.9	1.125	-1114.4
1.126	-1114.1									1.126	-1063.1	1.126	-1065.7	1.126	-1070.2	1.126	-1073.8	1.126	-1079.8	1.126	-1086	1.126	-1095	1.126	-1102	1.126	-1108.6	1.126	-1114.1
1.127	-1114.5									1.127	-1063.5	1.127	-1065.5	1.127	-1070.1	1.127	-1073.2	1.127	-1079.6	1.127	-1085.8	1.127	-1094.8	1.127	-1102.1	1.127	-1108.2	1.127	-1114.5
1.128	-1114.4									1.128	-1063.2	1.128	-1065.1	1.128	-1069.8	1.128	-1073.1	1.128	-1078.3	1.128	-1085.5	1.128	-1094.6	1.128	-1102.3	1.128	-1108.6	1.128	-1114.4
1.129	-1114.3									1.129	-1063	1.129	-1063.9	1.129	-1069.4	1.129	-1072.3	1.129	-1078.5	1.129	-1084.1	1.129	-1094.1	1.129	-1101.7	1.129	-1108.6	1.129	-1114.3
1.13	-1114.2									1.13	-1062.9	1.13	-1065.2	1.13	-1069.9	1.13	-1072.3	1.13	-1079	1.13	-1085	1.13	-1093.6	1.13	-1101.5	1.13	-1108.9	1.13	-1114.2
1.131	-1114.6									1.131	-1062.8	1.131	-1065.2	1.131	-1069.7	1.131	-1072.8	1.131	-1078.6	1.131	-1084.4	1.131	-1093.6	1.131	-1101.1	1.131	-1108.7	1.131	-1114.6
1.132	-1114.5									1.132	-1063.4	1.132	-1065.1	1.132	-1069.8	1.132	-1072.6	1.132	-1079.3	1.132	-1084.5	1.132	-1093.7	1.132	-1101.4	1.132	-1109	1.132	-1114.5
1.133	-1114.4									1.133	-1062.5	1.133	-1065.2	1.133	-1069.1	1.133	-1072.8	1.133	-1078.9	1.133	-1084.6	1.133	-1094	1.133	-1101.5	1.133	-1108.9	1.133	-1114.4
1.134	-1114.6									1.134	-1062.9	1.134	-1065.4	1.134	-1069.8	1.134	-1072.7	1.134	-1078.6	1.134	-1084.7	1.134	-1094.4	1.134	-1101.1	1.134	-1108.9	1.134	-1114.6
1.135	-1114.6									1.135	-1062.1	1.135	-1065.3	1.135	-1069.9	1.135	-1072.8	1.135	-1079.1	1.135	-1084	1.135	-1095.2	1.135	-1101.3	1.135	-1109.8	1.135	-1114.6
1.136	-1115.2									1.136	-1063.3	1.136	-1065.1	1.136	-1069.8	1.136	-1072.5	1.136	-1078.8	1.136	-1084.1	1.136	-1095.2	1.136	-1101	1.136	-1109.2	1.136	-1115.2
1.137	-1115.3									1.137	-1062.9	1.137	-1065.7	1.137	-1069.4	1.137	-1072.8	1.137	-1079.4	1.137	-1084.3	1.137	-1095	1.137	-1100.8	1.137	-1109.2	1.137	-1115.3
1.138	-1115.1									1.138	-1063.6	1.138	-1065.6	1.138	-1069.2	1.138	-1072.9	1.138	-1079.5	1.138	-1084.5	1.138	-1094.8	1.138	-1101.1	1.138	-1109.2	1.138	-1115.1
1.139	-1114.4									1.139	-1063.6	1.139	-1065.6	1.139	-1069.4	1.139	-1072.4	1.139	-1079.4	1.139	-1084.7	1.139	-1094.9	1.139	-1101.3	1.139	-1108.8	1.139	-1114.4
1.14	-1114.9									1.14	-1063.3	1.14	-1065.7	1.14	-1069.5	1.14	-1072.8	1.14	-1079.2	1.14	-1084.6	1.14	-1095.5	1.14	-1101.1	1.14	-1109.2	1.14	-1114.9
1.141	-1114.5									1.141	-1063.9	1.141	-1065.7	1.141	-1069.8	1.141	-1072.8	1.141	-1079.2	1.141	-1084.6	1.141	-1095.6	1.141	-1101.3	1.141	-1109.4	1.141	-1114.5
1.142	-1114.6									1.142	-1063.8	1.142	-1065.6	1.142	-1069.9	1.142	-1072.8	1.142	-1079.2	1.142	-1084.6	1.142	-1096.1	1.142	-1101.8	1.142	-1109	1.142	-1114.6
1.143	-1115									1.143	-1064	1.143	-1065.9	1.143	-1070.1	1.143	-1073	1.143	-1079.4	1.143	-1083.6	1.143	-1095.8	1.143	-1100.4	1.143	-1109.2	1.143	-1115
1.144	-1114.6									1.144	-1063.7	1.144	-1066	1.144	-1070.2	1.144	-1072.8	1.144	-1079.5	1.144	-1083.3	1.144	-1095.8	1.144	-1100.9	1.144	-1109.2	1.144	-1114.6
1.145	-1115.2									1.145	-1064	1.145	-1065.9	1.145	-1070.1	1.145	-1073.1	1.145	-1079.8	1.145	-1083.4	1.145	-1096.3	1.145	-1100.6	1.145	-1109.1	1.145	-1115.2
1.146	-1115.1									1.146	-1064.5	1.146	-1065.9	1.146	-1070.6	1.146	-1073.3	1.146	-1080	1.146	-1083.5	1.146	-1095.9	1.146	-1100	1.146	-1108.9	1.146	-1115.1
1.147	-1115									1.147	-1064.4	1.147	-1065.6	1.147	-1070	1.147	-1073.5	1.147	-1079.4	1.147	-1083.3	1.147	-1095.8	1.147	-1099.6	1.147	-1108.9	1.147	-1115
1.148	-1115									1.148	-1064.2	1.148	-1065.4	1.148	-1070	1.148	-1072.9	1.148	-1078.7	1.148	-1082.6	1.148	-1095.5	1.148	-1100.2	1.148	-1109.2	1.148	-1115
1.149	-1115.4									1.149	-1064.3	1.149	-1065.1	1.149	-1070.4	1.149	-1072.1	1.149	-1079.2	1.149	-1082.6	1.149	-1095.6	1.149	-1100.4	1.149	-1109.4	1.149	-1115.4
1.15	-1115									1.15	-1064	1.15	-1065.4	1.15	-1070.4	1.15	-1071.6	1.15	-1078.7	1.15	-1082.6	1.15	-1095.7	1.15	-1101	1.15	-1109.3	1.15	-1115
1.151	-1114.9									1.151	-1064.6	1.151	-1065.3	1.151	-1070.9	1.151	-1071.7	1.151	-1078.4	1.151	-1082.7	1.151	-1095.4	1.151	-1100.8	1.151	-1109.4	1.151	-1114.9
1.152	-1114.9									1.152	-1064.6	1.152	-1065.4	1.152	-1070.8	1.152	-1071.7	1.152	-1078.4	1.152	-1082.5	1.152	-1095.7	1.152	-1100.4	1.152	-1109.6	1.152	-1114.9
1.153	-1115.1									1.153	-1064.5	1.153	-1065.3	1.153	-1070.5	1.153	-1071.3	1.153	-1078.1	1.153	-1082.9	1.153	-1095.4	1.153	-1100.6	1.153	-1109.8	1.153	-1115.1
1.154	-1115.5									1.154	-1064.8	1.154	-1065.3	1.154	-1070.8	1.154	-1071.8	1.154	-1078.6	1.154	-1083	1.154	-1095.7	1.154	-1100	1.154	-1109.6	1.154	-1115.5
1.155	-1115.7									1.155	-1064.8	1.155	-1065.6	1.155	-1070.5	1.155	-1071	1.155	-1077.9	1.155	-1083.7	1.155	-1095.7	1.155	-1100.6	1.155	-1108.4	1.155	-1115.7
1.156	-1115.3									1.156	-1064.1	1.156	-1065.6	1.156	-1070.2	1.156	-1071.1	1.156	-1077.9	1.156	-1083.8	1.156	-1095.7	1.156	-1100.6	1.156	-1108.5	1.156	-1115.3
1.157	-1115.9									1.157	-1063.9	1.157	-1066	1.157	-1070.3	1.157	-1070.8	1.157	-1077.6	1.157	-1082.3	1.157	-1096.3	1.157	-1100.6	1.157	-1109.4	1.157	-1115.9
1.158	-1116									1.158	-1063.9	1.158	-1066	1.158	-1069.8	1.158	-1071	1.158	-1076.4	1.158	-1082.7	1.158	-1095.8	1.158	-1100.9	1.158	-1109	1.158	-1116
1.159	-1114.7									1.159	-1063.8	1.159	-1066.2	1.159	-1069.6	1.159	-1070.6	1.159	-1076.8	1.159	-1083.1	1.159	-1095.9	1.159	-1101.2	1.159	-1109.6	1.159	-1114.7
1.16	-1115.1									1.16	-1062.9	1.16	-1066.9	1.16	-1069.5	1.16	-1070.6	1.16	-1077.1	1.16	-1079.8	1.16	-1093.6	1.16	-1101.3	1.16	-1108.9	1.16	-1115.1
1.161	-1115.2									1.161	-1063.8	1.161	-1066.7	1.161	-1069	1.161	-1069.7	1.161	-1077.1	1.161	-1080.2	1.161	-1094.2	1.161	-1101.4	1.161	-1108.6	1.161	-1115.2
1.162	-1115.5									1.162	-1063.8	1.162	-1065.6	1.162	-1069	1.162	-1070.1	1.162	-1077.1	1.162	-1080.8	1.162	-1093.6	1.162	-1101.4	1.162	-1109.2	1.162	-1115.5
1.163	-1115.8									1.163	-1063.1	1.163	-1064.9	1.163	-1069.3	1.163	-1069.7	1.163	-1077.2	1.163	-1081.3	1.163	-1093.8	1.163	-1102.1	1.163	-1109.1	1.163	-1115.8
1.164	-1115.4									1.164	-1063.2	1.164	-1064.4	1.164	-1069	1.164	-1069.8	1.164	-1076.9	1.164	-1081.4	1.164	-1093.1	1.164	-1101.5	1.164	-1109	1.164	-1115.4
1.165	-1115.9									1.165	-1063.2	1.165	-1065.4	1.165	-1068.8	1.165	-1069.5	1.165	-1076.9	1.165	-1081.1	1.165	-1093.3	1.165	-1102.5	1.165	-1109.6	1.165	-1115.9
1.166	-1115.9									1.166	-1063.3	1.166	-1065	1.166	-1068.9	1.166	-1068.9	1.166	-1076.9	1.166	-1081	1.166	-1092.7	1.166	-1101.6	1.166	-1108.7	1.166	-1115.9
1.167	-1116.1									1.167	-1063.1	1.167	-1065.3	1.167	-1068.9	1.167	-1069.1	1.167	-1077.3	1.167	-1081.4	1.167	-1092.8	1.167	-1101.8	1.167	-1109.1	1.167	-1116.1
1.168	-1116									1.168	-1063.5	1.168	-1065.4	1.168	-1068.7	1.168	-1069.3	1.168	-1077.7	1.168	-1081.3	1.168	-1093.2	1.168	-1102.4	1.168	-1108.2	1.168	-1116
1.169	-1116									1.169	-1063.7	1.169	-1065.4	1.169	-1068.5	1.169	-1069.6	1.169	-1077.3	1.169	-1081.4	1.169	-1092.9	1.169	-1102.5	1.169	-1109.2	1.169	-1116
1.17	-1116.2									1.17	-1063	1.17	-1065.3	1.17	-1069.2	1.17	-1070.3	1.17	-1077.2	1.17	-1081.2	1.17	-1092.7	1.17	-1102	1.17	-1109.9	1.17	-1116.2
1.171	-1115.5									1.171	-1063.1	1.171	-1065.4	1.171	-1069.6	1.171	-1070.4	1.171	-1077.2	1.171	-1081.4	1.171	-1092.5	1.171	-1102.2	1.171	-1109.6	1.171	-1115.5
1.172	-1115.9									1.172	-1062.5	1.172	-1065.4	1.172	-1069.3	1.172	-1071.2	1.172	-1077.6	1.172	-1081.4	1.172	-1092	1.172	-1101.9	1.172	-1108.9	1.172	-1115.9
1.173	-1115.5									1.173	-1062.9	1.173	-1065.5	1.173	-1069.4	1.173	-1072.1	1.173	-1077.1	1.173	-1080.9	1.173	-1092.4	1.173	-1101.5	1.173	-1109.3	1.173	-1115.5
1.174	-1115.7									1.174	-1062.8	1.174	-1065.5	1.174	-1069.1	1.174	-1071.3	1.174	-1077.3	1.174	-1080.5	1.174	-1092.5	1.174	-1101.1	1.174	-1109.5	1.174	-1115.7
1.175	-1116.2									1.175	-1062.9	1.175	-1065.7	1.175	-1068.9	1.175	-1072.2	1.175	-1077.8	1.175	-1080.8	1.175	-1092.7	1.175	-1101	1.175	-1108.9	1.175	-1116.2
1.176	-1116									1.176	-1063.4	1.176	-1066.1	1.176	-1069.2	1.176	-1071.4	1.176	-1077.7	1.176	-1081.6	1.176	-1092.7	1.176	-1100.9	1.176	-1108.3	1.176	-1116
1.177	-1115.7									1.177	-1063.3	1.177	-1065.9	1.177	-1068.8	1.177	-1071.9	1.177	-1077.9	1.177	-1081.3	1.177	-1092.7	1.177	-1100.9	1.177	-1108.6	1.177	-1115.7
1.178	-1115.5									1.178	-1063.1	1.178	-1065.4	1.178	-1069	1.178	-1072.6	1.178	-1077.7	1.178	-1080.9	1.178	-1093.1	1.178	-1101.1	1.178	-1108.9	1.178	-1115.5
1.179	-1115.4									1.179	-1062.8	1.179	-1065.6	1.179	-1069	1.179	-1072.3	1.179	-1077.7	1.179	-1079.5	1.179	-1092.8	1.179	-1100.7	1.179	-1108.4	1.179	-1115.4
1.18	-1115									1.18	-1062.8	1.18	-1065.6	1.18	-1069.4	1.18	-1072.5	1.18	-1078	1.18	-1080.1	1.18	-1092.3	1.18	-1100.8	1.18	-1108.5	1.18	-1115
1.181	-1115.1									1.181	-1062.7	1.181	-1066	1.181	-1069.3	1.181	-1072.4	1.181	-1078.1	1.181	-1079.7	1.181	-1092.6	1.181	-1100.8	1.181	-1108.4	1.181	-1115.1
1.182	-1115.5									1.182	-1062.9	1.182	-1065.7	1.182	-1069.6	1.182	-1072.2	1.182	-1078.2	1.182	-1080.1	1.182	-1092.6	1.182	-1100.8	1.182	-1108.4	1.182	-1115.5
1.183	-1114.5									1.183	-1063.2	1.183	-1065.7	1.183	-1069.9	1.183	-1072.4	1.183	-1077.9	1.183	-1080.5	1.183	-1092.6	1.183	-1100.8	1.183	-1108.6	1.183	-1114.5
1.184	-1115.1									1.184	-1062.5	1.184	-1065.9	1.184	-1069.1	1.184	-1072.1	1.184	-1077.3	1.184	-1081	1.184	-1092.9	1.184	-1100.7	1.184	-1108.4	1.184	-1115.1
1.185	-1114.8									1.185	-1063.3	1.185	-1065.7	1.185	-1070.4	1.185	-1072.3	1.185	-1077.3	1.185	-1081.2	1.185	-1092.5	1.185	-1100.7	1.185	-1108.7	1.185	-1114.8
1.186	-1115									1.186	-1063.2	1.186	-1065.9	1.186	-1070.9	1.186	-1072.3	1.186	-1077.8	1.186	-1081.3	1.186	-1092.5	1.186	-1100.6	1.186	-1108.5	1.186	-1115
1.187	-1115.8									1.187	-1063.3	1.187	-1066	1.187	-1070	1.187	-1072.8	1.187	-1077.7	1.187	-1081	1.187	-1092.3	1.187	-1100.7	1.187	-1108	1.187	-1115.8
1.188	-1114.9									1.188	-1063.4	1.188	-1066	1.188	-1070.2	1.188	-1072.2	1.188	-1077.9	1.188	-1080.9	1.188	-1092.6	1.188	-1100.7	1.188	-1108.6	1.188	-1114.9
1.189	-1115.6									1.189	-1063.2	1.189	-1066.2	1.189	-1070	1.189	-1072.1	1.189	-1077.7	1.189	-1080.6	1.189	-1092.5	1.189	-1100.6	1.189	-1108.3	1.189	-1115.6
1.19	-1115.5									1.19	-1063.3	1.19	-1066.1	1.19	-1070.5	1.19	-1072	1.19	-1077.7	1.19	-1081.2	1.19	-1092.6	1.19	-1101.2	1.19	-1108.7	1.19	-1115.5
1.191	-1115.4									1.191	-1063.2	1.191	-1066.1	1.191	-1070.3	1.191	-1071.9	1.191	-1078.9	1.191	-1080.9	1.191	-1092.8	1.191	-1100.8	1.191	-1108	1.191	-1115.4
1.192	-1115.7									1.192	-1063.6	1.192	-1066.2	1.192	-1070	1.192	-1070.7	1.192	-1078.1	1.192	-1081	1.192	-1093.4	1.192	-1101	1.192	-1108.3	1.192	-1115.7
1.193	-1115.5									1.193	-1063.8	1.193	-1065.9	1.193	-1069.4	1.193	-1071.2	1.193	-1077.7	1.193	-1080.9	1.193	-1093.2	1.193	-1100.8	1.193	-1108.6	1.193	-1115.5
1.194	-1115.8									1.194	-1063.7	1.194	-1066.3	1.194	-1070	1.194	-1071	1.194	-1077.7	1.194	-1080.3	1.194	-1093.4	1.194	-1100.6	1.194	-1108.8	1.194	-1115.8
1.195	-1115.9									1.195	-1063.8	1.195	-1065.9	1.195	-1069.9	1.195	-1071.1	1.195	-1077.7	1.195	-1080.4	1.195	-1093.4	1.195	-1099.7	1.195	-1108.4	1.195	-1115.9
1.196	-1116									1.196	-1063.6	1.196	-1065.7	1.196	-1070.7	1.196	-1071.1	1.196	-1077.1	1.196	-1081.2	1.196	-1093.7	1.196	-1100.2	1.196	-1108	1.196	-1116
1.197	-1116.1									1.197	-1064	1.197	-1065.4	1.197	-1070	1.197	-1071.8	1.197	-1077.2	1.197	-1081	1.197	-1093.4	1.197	-1100.8	1.197	-1107.7	1.197	-1116.1
1.198	-1116.4									1.198	-1063.9	1.198	-1065.8	1.198	-1070.1	1.198	-1071.4	1.198	-1077.3	1.198	-1081.1	1.198	-1093.2	1.198	-1100.3	1.198	-1107.6	1.198	-1116.4
1.199	-1116.5									1.199	-1064.7	1.199	-1065.9	1.199	-1070.3	1.199	-1071.3	1.199	-1076.4	1.199	-1080.9	1.199	-1093.1	1.199	-1099.5	1.199	-1108	1.199	-1116.5
1.2	-1115.7									1.2	-1063.7	1.2	-1066.2	1.2	-1070.7	1.2	-1071	1.2	-1076.1	1.2	-1081.3	1.2	-1092.8	1.2	-1099.6	1.2	-1107.8	1.2	-1115.7
1.201	-1115.6									1.201	-1064.5	1.201	-1066.1	1.201	-1071.2	1.201	-1071.6	1.201	-1076.7	1.201	-1080.9	1.201	-1092.4	1.201	-1099.8	1.201	-1107.9	1.201	-1115.6
1.202	-1115.7									1.202	-1064.9	1.202	-1066.4	1.202	-1070.8	1.202	-1071.6	1.202	-1076.7	1.202	-1081.2	1.202	-1092.5	1.202	-1099.3	1.202	-1107.9	1.202	-1115.7
1.203	-1115.7									1.203	-1064.8	1.203	-1065.9	1.203	-1070.4	1.203	-1071.6	1.203	-1077.1	1.203	-1081.7	1.203	-1092.1	1.203	-1099.4	1.203	-1107.8	1.203	-1115.7
1.204	-1115.5									1.204	-1064.1	1.204	-1066.4	1.204	-1070.2	1.204	-1070.7	1.204	-1076.4	1.204	-1081.5	1.204	-1092.4	1.204	-1099.4	1.204	-1107.5	1.204	-1115.5
1.205	-1115									1.205	-1064.4	1.205	-1066.4	1.205	-1070.1	1.205	-1071.1	1.205	-1076.9	1.205	-1081	1.205	-1092.2	1.205	-1099.7	1.205	-1107.8	1.205	-1115
1.206	-1115.1									1.206	-1063.8	1.206	-1066.3	1.206	-1070.4	1.206	-1070.9	1.206	-1076.9	1.206	-1081.6	1.206	-1091.7	1.206	-1099.9	1.206	-1108.2	1.206	-1115.1
1.207	-1115.3									1.207	-1064.3	1.207	-1066.2	1.207	-1070.2	1.207	-1070.8	1.207	-1076.6	1.207	-1081.2	1.207	-1092.1	1.207	-1099.8	1.207	-1107.8	1.207	-1115.3
1.208	-1114.9									1.208	-1063.9	1.208	-1066.5	1.208	-1070.1	1.208	-1071.4	1.208	-1076	1.208	-1081.3	1.208	-1092	1.208	-1100.2	1.208	-1107.8	1.208	-1114.9
1.209	-1115.5									1.209	-1064	1.209	-1067.6	1.209	-1070.1	1.209	-1072.1	1.209	-1076.6	1.209	-1080.9	1.209	-1091.8	1.209	-1099.8	1.209	-1107.3	1.209	-1115.5
1.21	-1115.5									1.21	-1063.6	1.21	-1067	1.21	-1070.6	1.21	-1071.2	1.21	-1076.6	1.21	-1080.9	1.21	-1091.3	1.21	-1100.4	1.21	-1106.7	1.21	-1115.5
1.211	-1114.7									1.211	-1063.8	1.211	-1067	1.211	-1070.4	1.211	-1070.8	1.211	-1076.3	1.211	-1080.9	1.211	-1090.4	1.211	-1101	1.211	-1106.6	1.211	-1114.7
1.212	-1114.2									1.212	-1063.8	1.212	-1067.2	1.212	-1070.5	1.212	-1071.5	1.212	-1075.8	1.212	-1080.7	1.212	-1090.4	1.212	-1098.6	1.212	-1106.6	1.212	-1114.2
1.213	-1114.6									1.213	-1063.8	1.213	-1067	1.213	-1070.7	1.213	-1071.6	1.213	-1076.4	1.213	-1080.4	1.213	-1090.1	1.213	-1099	1.213	-1105.6	1.213	-1114.6
1.214	-1114.8									1.214	-1063.3	1.214	-1066.8	1.214	-1070.7	1.214	-1071.8	1.214	-1075.9	1.214	-1080.5	1.214	-1090.4	1.214	-1099.2	1.214	-1105.5	1.214	-1114.8
1.215	-1115									1.215	-1063.6	1.215	-1067	1.215	-1071	1.215	-1071.7	1.215	-1076.1	1.215	-1080.8	1.215	-1090.5	1.215	-1098.4	1.215	-1106	1.215	-1115
1.216	-1115									1.216	-1063.2	1.216	-1066.9	1.216	-1071.3	1.216	-1071.7	1.216	-1075.9	1.216	-1080.4	1.216	-1090.5	1.216	-1098.1	1.216	-1105	1.216	-1115
1.217	-1115.5									1.217	-1063.8	1.217	-1067.2	1.217	-1071.1	1.217	-1072.4	1.217	-1076.6	1.217	-1080.7	1.217	-1090.2	1.217	-1098.8	1.217	-1105.6	1.217	-1115.5
1.218	-1115.3									1.218	-1063.7	1.218	-1067	1.218	-1071.1	1.218	-1072.4	1.218	-1076.1	1.218	-1080.6	1.218	-1090.3	1.218	-1097.9	1.218	-1106.3	1.218	-1115.3
1.219	-1115.4									1.219	-1064	1.219	-1067	1.219	-1071	1.219	-1072.9	1.219	-1076.7	1.219	-1081	1.219	-1090.2	1.219	-1098.4	1.219	-1106.4	1.219	-1115.4
1.22	-1114.9									1.22	-1064.3	1.22	-1067	1.22	-1071.3	1.22	-1072.7	1.22	-1076.5	1.22	-1080.9	1.22	-1088.6	1.22	-1098	1.22	-1105.8	1.22	-1114.9
1.221	-1115.1									1.221	-1064.2	1.221	-1066.6	1.221	-1071.4	1.221	-1072.4	1.221	-1076.6	1.221	-1080	1.221	-1088.7	1.221	-1098.5	1.221	-1105.6	1.221	-1115.1
1.222	-1114.8									1.222	-1064.2	1.222	-1067.1	1.222	-1071.4	1.222	-1072.9	1.222	-1076.1	1.222	-1080.1	1.222	-1088	1.222	-1098	1.222	-1105.4	1.222	-1114.8
1.223	-1115.5									1.223	-1064.2	1.223	-1067.1	1.223	-1071.3	1.223	-1072.2	1.223	-1076.6	1.223	-1080.3	1.223	-1088.6	1.223	-1098	1.223	-1106.1	1.223	-1115.5
1.224	-1114.7									1.224	-1063.4	1.224	-1067	1.224	-1070.9	1.224	-1072.2	1.224	-1076.6	1.224	-1079.9	1.224	-1088.9	1.224	-1097.8	1.224	-1105.9	1.224	-1114.7
1.225	-1115.2									1.225	-1064.2	1.225	-1067.3	1.225	-1070.8	1.225	-1071.9	1.225	-1076.7	1.225	-1080	1.225	-1088.1	1.225	-1098.1	1.225	-1106.4	1.225	-1115.2
1.226	-1115.3									1.226	-1064.1	1.226	-1067	1.226	-1071.3	1.226	-1072.5	1.226	-1077	1.226	-1079.9	1.226	-1088.4	1.226	-1098.4	1.226	-1105.8	1.226	-1115.3
1.227	-1114.9									1.227	-1065	1.227	-1066.9	1.227	-1071.5	1.227	-1072.9	1.227	-1076.8	1.227	-1079.6	1.227	-1089	1.227	-1098.5	1.227	-1105.6	1.227	-1114.9
1.228	-1115.5									1.228	-1064.6	1.228	-1066.7	1.228	-1072	1.228	-1072.9	1.228	-1076.1	1.228	-1080	1.228	-1088.4	1.228	-1098.3	1.228	-1105.9	1.228	-1115.5
1.229	-1115.9									1.229	-1065.4	1.229	-1066.9	1.229	-1071	1.229	-1072.7	1.229	-1076.3	1.229	-1079.7	1.229	-1088.4	1.229	-1098.8	1.229	-1106.2	1.229	-1115.9
1.23	-1115.5									1.23	-1064.9	1.23	-1066.6	1.23	-1070.6	1.23	-1072.5	1.23	-1076.3	1.23	-1079.9	1.23	-1088.3	1.23	-1099	1.23	-1105.9	1.23	-1115.5
1.231	-1116.1									1.231	-1063.7	1.231	-1066.4	1.231	-1070.9	1.231	-1072.9	1.231	-1076.6	1.231	-1080	1.231	-1088.9	1.231	-1099.8	1.231	-1106.4	1.231	-1116.1
1.232	-1115.3									1.232	-1063.7	1.232	-1066.5	1.232	-1071	1.232	-1073	1.232	-1077	1.232	-1079.8	1.232	-1088.7	1.232	-1099.8	1.232	-1106.1	1.232	-1115.3
1.233	-1116.1									1.233	-1063.1	1.233	-1066.9	1.233	-1071.5	1.233	-1073.4	1.233	-1076.5	1.233	-1079.4	1.233	-1088.8	1.233	-1100.1	1.233	-1106.7	1.233	-1116.1
1.234	-1115.6									1.234	-1063.2	1.234	-1066.6	1.234	-1071.1	1.234	-1073.2	1.234	-1076.6	1.234	-1079.7	1.234	-1088.9	1.234	-1100.3	1.234	-1106.2	1.234	-1115.6
1.235	-1115.5									1.235	-1063.2	1.235	-1066.3	1.235	-1071.4	1.235	-1073.4	1.235	-1076.6	1.235	-1079.5	1.235	-1088.5	1.235	-1100.4	1.235	-1106.2	1.235	-1115.5
1.236	-1116.2									1.236	-1063.4	1.236	-1066.5	1.236	-1071.3	1.236	-1073.1	1.236	-1076.6	1.236	-1079.7	1.236	-1088.4	1.236	-1100	1.236	-1106.1	1.236	-1116.2
1.237	-1115.9									1.237	-1063	1.237	-1066.5	1.237	-1071.8	1.237	-1073.1	1.237	-1076.6	1.237	-1079.5	1.237	-1089.1	1.237	-1100.4	1.237	-1106	1.237	-1115.9
1.238	-1116.4									1.238	-1063.7	1.238	-1066.7	1.238	-1071.7	1.238	-1073.3	1.238	-1077.3	1.238	-1080.1	1.238	-1089.2	1.238	-1100.6	1.238	-1106	1.238	-1116.4
1.239	-1115.6									1.239	-1063.7	1.239	-1067.3	1.239	-1071.9	1.239	-1073.7	1.239	-1077.4	1.239	-1080.4	1.239	-1089.1	1.239	-1100.8	1.239	-1106.2	1.239	-1115.6
1.24	-1114.4									1.24	-1063.5	1.24	-1066.7	1.24	-1071.2	1.24	-1073.1	1.24	-1077.2	1.24	-1080.6	1.24	-1088.6	1.24	-1100.5	1.24	-1105.8	1.24	-1114.4
1.241	-1114.3									1.241	-1063.8	1.241	-1067.1	1.241	-1071.6	1.241	-1073.6	1.241	-1077.1	1.241	-1080.5	1.241	-1088.5	1.241	-1100.2	1.241	-1106.2	1.241	-1114.3
1.242	-1113.7									1.242	-1063.6	1.242	-1067.3	1.242	-1071.6	1.242	-1073.1	1.242	-1078	1.242	-1080.7	1.242	-1088.7	1.242	-1099.5	1.242	-1105.8	1.242	-1113.7
1.243	-1113.9									1.243	-1063.6	1.243	-1067.1	1.243	-1071.5	1.243	-1072.9	1.243	-1078	1.243	-1080.1	1.243	-1088.9	1.243	-1100	1.243	-1105.9	1.243	-1113.9
1.244	-1113.7									1.244	-1063.4	1.244	-1067.1	1.244	-1071.5	1.244	-1072.9	1.244	-1077.4	1.244	-1080	1.244	-1088.8	1.244	-1099.6	1.244	-1105.6	1.244	-1113.7
1.245	-1114.1									1.245	-1063.3	1.245	-1067.9	1.245	-1071.8	1.245	-1073.1	1.245	-1077.6	1.245	-1080.2	1.245	-1089.2	1.245	-1100.1	1.245	-1105.1	1.245	-1114.1
1.246	-1113.6									1.246	-1063.1	1.246	-1067.9	1.246	-1071	1.246	-1072.7	1.246	-1077.4	1.246	-1079.1	1.246	-1089.1	1.246	-1099.7	1.246	-1105.5	1.246	-1113.6
1.247	-1113.7									1.247	-1063.2	1.247	-1068	1.247	-1072	1.247	-1072.9	1.247	-1077.5	1.247	-1079.8	1.247	-1089.2	1.247	-1099.7	1.247	-1105	1.247	-1113.7
1.248	-1112.3									1.248	-1063.1	1.248	-1067.4	1.248	-1071.4	1.248	-1072.7	1.248	-1076.8	1.248	-1080	1.248	-1089	1.248	-1099.4	1.248	-1104.3	1.248	-1112.3
1.249	-1112.6									1.249	-1063.4	1.249	-1067.9	1.249	-1071.6	1.249	-1072.3	1.249	-1077	1.249	-1079.9	1.249	-1089.8	1.249	-1099.9	1.249	-1104.2	1.249	-1112.6
1.25	-1113.4									1.25	-1063.1	1.25	-1067.8	1.25	-1071.5	1.25	-1072.9	1.25	-1076.8	1.25	-1078.9	1.25	-1089	1.25	-1099.6	1.25	-1103.9	1.25	-1113.4
1.251	-1112.7									1.251	-1063.5	1.251	-1068.3	1.251	-1071.3	1.251	-1072.4	1.251	-1076.7	1.251	-1079.3	1.251	-1089.2	1.251	-1099.7	1.251	-1104.1	1.251	-1112.7
1.252	-1112.4									1.252	-1062.7	1.252	-1067.6	1.252	-1072	1.252	-1072.5	1.252	-1076.8	1.252	-1079.7	1.252	-1089	1.252	-1099.5	1.252	-1104.1	1.252	-1112.4
1.253	-1112.8									1.253	-1063.8	1.253	-1067.8	1.253	-1072.2	1.253	-1072.9	1.253	-1076.2	1.253	-1078.8	1.253	-1089.3	1.253	-1099	1.253	-1103.1	1.253	-1112.8
1.254	-1112.8									1.254	-1063.4	1.254	-1068	1.254	-1072.4	1.254	-1072.8	1.254	-1076.8	1.254	-1080.5	1.254	-1089.1	1.254	-1099.1	1.254	-1103	1.254	-1112.8
1.255	-1113									1.255	-1063.8	1.255	-1068.2	1.255	-1071.9	1.255	-1072.7	1.255	-1076.2	1.255	-1080.3	1.255	-1089.1	1.255	-1099.4	1.255	-1102.7	1.255	-1113
1.256	-1113.1									1.256	-1064.1	1.256	-1067.3	1.256	-1072	1.256	-1072.6	1.256	-1076.4	1.256	-1080.7	1.256	-1089.1	1.256	-1099.4	1.256	-1102.6	1.256	-1113.1
1.257	-1112.6									1.257	-1064.1	1.257	-1067.3	1.257	-1071.9	1.257	-1073	1.257	-1076.1	1.257	-1080.9	1.257	-1089.6	1.257	-1098.4	1.257	-1102.4	1.257	-1112.6
1.258	-1112.4									1.258	-1062.6	1.258	-1067.2	1.258	-1071.7	1.258	-1072.5	1.258	-1075.8	1.258	-1080.6	1.258	-1090.1	1.258	-1098.9	1.258	-1102.2	1.258	-1112.4
1.259	-1113.1									1.259	-1063.8	1.259	-1067.6	1.259	-1071.8	1.259	-1073.4	1.259	-1075.9	1.259	-1081.8	1.259	-1090	1.259	-1098.7	1.259	-1102.3	1.259	-1113.1
1.26	-1112									1.26	-1063.2	1.26	-1067.3	1.26	-1072.2	1.26	-1073.9	1.26	-1076	1.26	-1081.9	1.26	-1089.7	1.26	-1099.5	1.26	-1102	1.26	-1112
1.261	-1112.1									1.261	-1063.8	1.261	-1067.6	1.261	-1072.7	1.261	-1074.2	1.261	-1076	1.261	-1082	1.261	-1090.6	1.261	-1099	1.261	-1102.1	1.261	-1112.1
1.262	-1111.5									1.262	-1063.4	1.262	-1067.2	1.262	-1071.6	1.262	-1073.6	1.262	-1076.2	1.262	-1082.8	1.262	-1090.5	1.262	-1099	1.262	-1102.1	1.262	-1111.5
1.263	-1111.9									1.263	-1064.1	1.263	-1067.1	1.263	-1071.5	1.263	-1074.4	1.263	-1076.1	1.263	-1082.2	1.263	-1090.9	1.263	-1099.5	1.263	-1102.5	1.263	-1111.9
1.264	-1111.6									1.264	-1064.2	1.264	-1067	1.264	-1071.8	1.264	-1074.5	1.264	-1076.1	1.264	-1082.8	1.264	-1091.2	1.264	-1099.4	1.264	-1102.7	1.264	-1111.6
1.265	-1112.4									1.265	-1065.1	1.265	-1067.7	1.265	-1071.8	1.265	-1074.8	1.265	-1076.5	1.265	-1082.3	1.265	-1091	1.265	-1099.1	1.265	-1102.7	1.265	-1112.4
1.266	-1112.4									1.266	-1065.2	1.266	-1067.1	1.266	-1071.6	1.266	-1074.8	1.266	-1076.8	1.266	-1083.1	1.266	-1090.6	1.266	-1099	1.266	-1102.8	1.266	-1112.4
1.267	-1112.6									1.267	-1064.9	1.267	-1067.2	1.267	-1071.8	1.267	-1074.9	1.267	-1077.3	1.267	-1083	1.267	-1091.6	1.267	-1099.6	1.267	-1103.1	1.267	-1112.6
1.268	-1112.4									1.268	-1064.4	1.268	-1066.6	1.268	-1071.9	1.268	-1075.3	1.268	-1076.7	1.268	-1083.6	1.268	-1091	1.268	-1099.3	1.268	-1103.2	1.268	-1112.4
1.269	-1112.1									1.269	-1063.9	1.269	-1067.3	1.269	-1072.3	1.269	-1074.9	1.269	-1077.1	1.269	-1083.4	1.269	-1091.4	1.269	-1099.5	1.269	-1102.1	1.269	-1112.1
1.27	-1111.9									1.27	-1063.1	1.27	-1067.7	1.27	-1071.6	1.27	-1075	1.27	-1076.8	1.27	-1083.6	1.27	-1091.2	1.27	-1100	1.27	-1102.5	1.27	-1111.9
1.271	-1111.9									1.271	-1063.5	1.271	-1068.4	1.271	-1072.1	1.271	-1075.5	1.271	-1077.5	1.271	-1083.7	1.271	-1090.7	1.271	-1099.6	1.271	-1102.7	1.271	-1111.9
1.272	-1111.3									1.272	-1063.6	1.272	-1068.1	1.272	-1071.8	1.272	-1074.8	1.272	-1077.3	1.272	-1083.5	1.272	-1090.7	1.272	-1098.9	1.272	-1102.9	1.272	-1111.3
1.273	-1110.4									1.273	-1064.2	1.273	-1067.8	1.273	-1072	1.273	-1075.4	1.273	-1077.8	1.273	-1083.7	1.273	-1091.1	1.273	-1099	1.273	-1102.9	1.273	-1110.4
1.274	-1111.3									1.274	-1063.3	1.274	-1067.5	1.274	-1072	1.274	-1075.5	1.274	-1078	1.274	-1084.4	1.274	-1090.6	1.274	-1100	1.274	-1103	1.274	-1111.3
1.275	-1110.7									1.275	-1063.6	1.275	-1067.5	1.275	-1071.9	1.275	-1075.7	1.275	-1077.3	1.275	-1083.7	1.275	-1090.9	1.275	-1100.4	1.275	-1102.4	1.275	-1110.7
1.276	-1110.5									1.276	-1063.6	1.276	-1067.3	1.276	-1072	1.276	-1075.2	1.276	-1077	1.276	-1084.6	1.276	-1090.4	1.276	-1099.7	1.276	-1102.5	1.276	-1110.5
1.277	-1111									1.277	-1063.4	1.277	-1067.5	1.277	-1071.8	1.277	-1075.6	1.277	-1076.8	1.277	-1084.6	1.277	-1091	1.277	-1100.4	1.277	-1102.3	1.277	-1111
1.278	-1111.1									1.278	-1063.3	1.278	-1067.4	1.278	-1071.8	1.278	-1075.5	1.278	-1076.6	1.278	-1084.2	1.278	-1090.5	1.278	-1098.2	1.278	-1102.1	1.278	-1111.1
1.279	-1110.3									1.279	-1063.8	1.279	-1067.3	1.279	-1072.2	1.279	-1075.3	1.279	-1077.1	1.279	-1082.6	1.279	-1090.9	1.279	-1098.7	1.279	-1102.3	1.279	-1110.3
1.28	-1109.1									1.28	-1062.9	1.28	-1066.6	1.28	-1072.2	1.28	-1075.1	1.28	-1077.1	1.28	-1083.1	1.28	-1090.5	1.28	-1098.7	1.28	-1102.5	1.28	-1109.1
1.281	-1108.6									1.281	-1063	1.281	-1067.4	1.281	-1072.3	1.281	-1075.5	1.281	-1076.9	1.281	-1084.5	1.281	-1091	1.281	-1098.2	1.281	-1102.3	1.281	-1108.6
1.282	-1108.5									1.282	-1063.6	1.282	-1065.9	1.282	-1071.9	1.282	-1075.2	1.282	-1077.4	1.282	-1084.4	1.282	-1090.7	1.282	-1097.9	1.282	-1102	1.282	-1108.5
1.283	-1108.4									1.283	-1063.5	1.283	-1065.9	1.283	-1072.6	1.283	-1075.5	1.283	-1077.7	1.283	-1084.8	1.283	-1091.2	1.283	-1098.7	1.283	-1102.3	1.283	-1108.4
1.284	-1108									1.284	-1062.7	1.284	-1064.9	1.284	-1072.5	1.284	-1075	1.284	-1077	1.284	-1084.5	1.284	-1090.8	1.284	-1097.7	1.284	-1102.1	1.284	-1108
1.285	-1107.8									1.285	-1062.9	1.285	-1065.2	1.285	-1072.3	1.285	-1075.3	1.285	-1077.3	1.285	-1084.4	1.285	-1091.4	1.285	-1098.3	1.285	-1102.2	1.285	-1107.8
1.286	-1107.5									1.286	-1062.8	1.286	-1065.1	1.286	-1072	1.286	-1075	1.286	-1077.5	1.286	-1081.8	1.286	-1091.5	1.286	-1097.9	1.286	-1102.3	1.286	-1107.5
1.287	-1107.1									1.287	-1062.7	1.287	-1064.7	1.287	-1072.7	1.287	-1074.6	1.287	-1077.5	1.287	-1082.2	1.287	-1091.7	1.287	-1098.5	1.287	-1102.5	1.287	-1107.1
1.288	-1106.9									1.288	-1063	1.288	-1065.1	1.288	-1072.2	1.288	-1074.7	1.288	-1077.5	1.288	-1082.1	1.288	-1090.7	1.288	-1097.7	1.288	-1101.7	1.288	-1106.9
1.289	-1107.3									1.289	-1062.7	1.289	-1064.8	1.289	-1072.5	1.289	-1075	1.289	-1077.7	1.289	-1082	1.289	-1090.5	1.289	-1097.6	1.289	-1101.7	1.289	-1107.3
1.29	-1107.5									1.29	-1062.8	1.29	-1064.6	1.29	-1072.1	1.29	-1075.1	1.29	-1078	1.29	-1081.6	1.29	-1089.6	1.29	-1098.1	1.29	-1101.6	1.29	-1107.5
1.291	-1107.5									1.291	-1063.1	1.291	-1064.9	1.291	-1072.4	1.291	-1075.5	1.291	-1078.5	1.291	-1081.4	1.291	-1090.1	1.291	-1098.2	1.291	-1101.4	1.291	-1107.5
1.292	-1107.9									1.292	-1063.1	1.292	-1064.9	1.292	-1071.8	1.292	-1074.8	1.292	-1078	1.292	-1081.3	1.292	-1089.8	1.292	-1096.8	1.292	-1101.5	1.292	-1107.9
1.293	-1106.8									1.293	-1063.4	1.293	-1064.8	1.293	-1072.1	1.293	-1074.6	1.293	-1077.8	1.293	-1081.3	1.293	-1090.1	1.293	-1096.9	1.293	-1101.9	1.293	-1106.8
1.294	-1107.7									1.294	-1063.2	1.294	-1064.8	1.294	-1071.7	1.294	-1074.3	1.294	-1077.6	1.294	-1081.3	1.294	-1089.6	1.294	-1096.9	1.294	-1101.6	1.294	-1107.7
1.295	-1107.6									1.295	-1063.1	1.295	-1065.4	1.295	-1072.2	1.295	-1074.9	1.295	-1077.3	1.295	-1081.4	1.295	-1090.9	1.295	-1097.4	1.295	-1101.6	1.295	-1107.6
1.296	-1106.9									1.296	-1063.1	1.296	-1064.9	1.296	-1071.1	1.296	-1074.6	1.296	-1077.5	1.296	-1081.7	1.296	-1090.4	1.296	-1096.4	1.296	-1100.8	1.296	-1106.9
1.297	-1106.9									1.297	-1063	1.297	-1065.8	1.297	-1071.5	1.297	-1074.5	1.297	-1078.3	1.297	-1081.9	1.297	-1090.5	1.297	-1096.8	1.297	-1101.6	1.297	-1106.9
1.298	-1107.5									1.298	-1062.8	1.298	-1064.7	1.298	-1071.3	1.298	-1074.2	1.298	-1078.1	1.298	-1082.5	1.298	-1090.3	1.298	-1096.4	1.298	-1101.7	1.298	-1107.5
1.299	-1107.6									1.299	-1063.1	1.299	-1065	1.299	-1071.2	1.299	-1074	1.299	-1077.5	1.299	-1082	1.299	-1090.4	1.299	-1096.4	1.299	-1101.6	1.299	-1107.6
1.3	-1107.2									1.3	-1062.8	1.3	-1064.9	1.3	-1070.2	1.3	-1074	1.3	-1077.6	1.3	-1082	1.3	-1090.6	1.3	-1096.1	1.3	-1101.1	1.3	-1107.2
1.301	-1107.4									1.301	-1063.1	1.301	-1065.2	1.301	-1070.6	1.301	-1074.2	1.301	-1077.7	1.301	-1082.1	1.301	-1090.2	1.301	-1096.8	1.301	-1101.3	1.301	-1107.4
1.302	-1106.9									1.302	-1062.7	1.302	-1064.5	1.302	-1070.5	1.302	-1073.9	1.302	-1077.4	1.302	-1081.6	1.302	-1090.3	1.302	-1097.2	1.302	-1100.9	1.302	-1106.9
1.303	-1106.9									1.303	-1062.9	1.303	-1064.7	1.303	-1070.3	1.303	-1073.9	1.303	-1077.7	1.303	-1080.9	1.303	-1090.4	1.303	-1096.3	1.303	-1101.1	1.303	-1106.9
1.304	-1107.4									1.304	-1063.1	1.304	-1065.1	1.304	-1070	1.304	-1073.6	1.304	-1077.9	1.304	-1080.7	1.304	-1090.3	1.304	-1095.7	1.304	-1101.3	1.304	-1107.4
1.305	-1106.8									1.305	-1062.7	1.305	-1065.2	1.305	-1069.8	1.305	-1073.9	1.305	-1077.5	1.305	-1080.6	1.305	-1090.4	1.305	-1096.7	1.305	-1100.8	1.305	-1106.8
1.306	-1106.5									1.306	-1063	1.306	-1065.1	1.306	-1069.6	1.306	-1073.7	1.306	-1077.1	1.306	-1080.9	1.306	-1090.2	1.306	-1095.6	1.306	-1100.6	1.306	-1106.5
1.307	-1106.5									1.307	-1063.3	1.307	-1065.3	1.307	-1070.2	1.307	-1074.1	1.307	-1077.9	1.307	-1080.7	1.307	-1090.2	1.307	-1096.1	1.307	-1100.6	1.307	-1106.5
1.308	-1106.8									1.308	-1062.3	1.308	-1065.2	1.308	-1070.3	1.308	-1073.6	1.308	-1077.6	1.308	-1081	1.308	-1090.1	1.308	-1095.8	1.308	-1100.6	1.308	-1106.8
1.309	-1106.4									1.309	-1063.3	1.309	-1065.7	1.309	-1070.8	1.309	-1073.9	1.309	-1078.1	1.309	-1080.3	1.309	-1090.4	1.309	-1095.9	1.309	-1100.5	1.309	-1106.4
1.31	-1106.9									1.31	-1062.7	1.31	-1065.5	1.31	-1070.9	1.31	-1073.3	1.31	-1077.8	1.31	-1080.3	1.31	-1089.4	1.31	-1095.5	1.31	-1100	1.31	-1106.9
1.311	-1106.9									1.311	-1062.8	1.311	-1065.5	1.311	-1071.3	1.311	-1073.1	1.311	-1078.1	1.311	-1079.8	1.311	-1090.1	1.311	-1095.4	1.311	-1099.6	1.311	-1106.9
1.312	-1107									1.312	-1062.7	1.312	-1066.1	1.312	-1071.1	1.312	-1073.1	1.312	-1077	1.312	-1079.9	1.312	-1090.6	1.312	-1096	1.312	-1099.9	1.312	-1107
1.313	-1107									1.313	-1063.6	1.313	-1066.1	1.313	-1070.9	1.313	-1072.6	1.313	-1077.8	1.313	-1079.9	1.313	-1089.9	1.313	-1096.4	1.313	-1099.8	1.313	-1107
1.314	-1106.8									1.314	-1062.9	1.314	-1065.8	1.314	-1071	1.314	-1072.5	1.314	-1077.7	1.314	-1080.4	1.314	-1089.8	1.314	-1096.2	1.314	-1099.5	1.314	-1106.8
1.315	-1107.4									1.315	-1063.6	1.315	-1066.2	1.315	-1070.7	1.315	-1072	1.315	-1077.2	1.315	-1081	1.315	-1090.3	1.315	-1096.8	1.315	-1099.9	1.315	-1107.4
1.316	-1107.8									1.316	-1063	1.316	-1066.4	1.316	-1070.7	1.316	-1071.9	1.316	-1077.6	1.316	-1081.9	1.316	-1090.4	1.316	-1096.7	1.316	-1099.7	1.316	-1107.8
1.317	-1107.9									1.317	-1062.8	1.317	-1066.5	1.317	-1070.7	1.317	-1072.1	1.317	-1077.9	1.317	-1080.6	1.317	-1090.9	1.317	-1096.7	1.317	-1099.9	1.317	-1107.9
1.318	-1108									1.318	-1062.4	1.318	-1066.3	1.318	-1070.6	1.318	-1070.8	1.318	-1077.4	1.318	-1081.1	1.318	-1090.5	1.318	-1097	1.318	-1099.8	1.318	-1108
1.319	-1107									1.319	-1063.1	1.319	-1066.1	1.319	-1070.9	1.319	-1072.2	1.319	-1078.1	1.319	-1079.1	1.319	-1090.4	1.319	-1096.5	1.319	-1100.1	1.319	-1107
1.32	-1107									1.32	-1062.5	1.32	-1066.4	1.32	-1070.5	1.32	-1072	1.32	-1078.5	1.32	-1080	1.32	-1090.4	1.32	-1097.1	1.32	-1100	1.32	-1107
1.321	-1107.2									1.321	-1063.3	1.321	-1066.8	1.321	-1071.1	1.321	-1072.2	1.321	-1077.3	1.321	-1079.9	1.321	-1089.1	1.321	-1097.2	1.321	-1099	1.321	-1107.2
1.322	-1107									1.322	-1063.2	1.322	-1066.3	1.322	-1070.4	1.322	-1071.9	1.322	-1078.2	1.322	-1080.4	1.322	-1089	1.322	-1097.5	1.322	-1099.5	1.322	-1107
1.323	-1106.3									1.323	-1063.6	1.323	-1066.4	1.323	-1070.3	1.323	-1072.3	1.323	-1078.9	1.323	-1080	1.323	-1089.6	1.323	-1097.7	1.323	-1099.5	1.323	-1106.3
1.324	-1106.7									1.324	-1063.2	1.324	-1066.3	1.324	-1069.8	1.324	-1072	1.324	-1079	1.324	-1079.9	1.324	-1089.6	1.324	-1096.5	1.324	-1099.4	1.324	-1106.7
1.325	-1106.9									1.325	-1063.7	1.325	-1066.2	1.325	-1070.6	1.325	-1072.5	1.325	-1078.8	1.325	-1079.9	1.325	-1088.9	1.325	-1096.3	1.325	-1099.8	1.325	-1106.9
1.326	-1106.3									1.326	-1063.6	1.326	-1066	1.326	-1069.7	1.326	-1072.1	1.326	-1078.4	1.326	-1080.4	1.326	-1089.4	1.326	-1095.8	1.326	-1099.7	1.326	-1106.3
1.327	-1107.3									1.327	-1063.8	1.327	-1066	1.327	-1069.9	1.327	-1073	1.327	-1079	1.327	-1080.7	1.327	-1089.8	1.327	-1095.8	1.327	-1100.6	1.327	-1107.3
1.328	-1106.5									1.328	-1063.5	1.328	-1065.9	1.328	-1069.9	1.328	-1072.6	1.328	-1078.7	1.328	-1081.6	1.328	-1089.7	1.328	-1095.6	1.328	-1099.4	1.328	-1106.5
1.329	-1106.2									1.329	-1063.3	1.329	-1066.1	1.329	-1070.2	1.329	-1073.1	1.329	-1078.2	1.329	-1081	1.329	-1089.9	1.329	-1095.7	1.329	-1099.3	1.329	-1106.2
1.33	-1106.1									1.33	-1063.5	1.33	-1065.7	1.33	-1069.8	1.33	-1073.2	1.33	-1078.1	1.33	-1081.5	1.33	-1088.9	1.33	-1095	1.33	-1099.7	1.33	-1106.1
1.331	-1106.4									1.331	-1064.1	1.331	-1066	1.331	-1069.8	1.331	-1073	1.331	-1078.6	1.331	-1081.6	1.331	-1089.4	1.331	-1095.3	1.331	-1099.7	1.331	-1106.4
1.332	-1106.9									1.332	-1063.8	1.332	-1065.8	1.332	-1069.6	1.332	-1073.6	1.332	-1078.2	1.332	-1082.1	1.332	-1088.5	1.332	-1094.6	1.332	-1099.8	1.332	-1106.9
1.333	-1106.8									1.333	-1063.8	1.333	-1066.2	1.333	-1070.1	1.333	-1073.9	1.333	-1078.1	1.333	-1082.3	1.333	-1088	1.333	-1094.7	1.333	-1100	1.333	-1106.8
1.334	-1107.5									1.334	-1063.1	1.334	-1066.1	1.334	-1069.7	1.334	-1072.4	1.334	-1078	1.334	-1082.8	1.334	-1087.7	1.334	-1094.8	1.334	-1099.6	1.334	-1107.5
1.335	-1107									1.335	-1063.8	1.335	-1066.3	1.335	-1069.8	1.335	-1071.9	1.335	-1078.5	1.335	-1082.1	1.335	-1087.7	1.335	-1094.4	1.335	-1100.1	1.335	-1107
1.336	-1107.1									1.336	-1063.8	1.336	-1066.1	1.336	-1069.1	1.336	-1071.8	1.336	-1077.8	1.336	-1082	1.336	-1088.3	1.336	-1094.1	1.336	-1099.5	1.336	-1107.1
1.337	-1107.6									1.337	-1063.8	1.337	-1066.3	1.337	-1069.6	1.337	-1070.2	1.337	-1077.8	1.337	-1082.5	1.337	-1088.6	1.337	-1094.3	1.337	-1099.1	1.337	-1107.6
1.338	-1106.4									1.338	-1063.1	1.338	-1065.8	1.338	-1069.5	1.338	-1071	1.338	-1077.5	1.338	-1082.6	1.338	-1088.4	1.338	-1094.6	1.338	-1099.6	1.338	-1106.4
1.339	-1106.2									1.339	-1063.4	1.339	-1065.4	1.339	-1069.7	1.339	-1071.5	1.339	-1077.9	1.339	-1082.6	1.339	-1088.3	1.339	-1093.9	1.339	-1099.5	1.339	-1106.2
1.34	-1106									1.34	-1063.4	1.34	-1065.7	1.34	-1068.7	1.34	-1070.9	1.34	-1078	1.34	-1082.9	1.34	-1088.2	1.34	-1093.8	1.34	-1099.7	1.34	-1106
1.341	-1106.1									1.341	-1062.9	1.341	-1065.7	1.341	-1068.8	1.341	-1071.5	1.341	-1077.9	1.341	-1083	1.341	-1088.3	1.341	-1094	1.341	-1099.7	1.341	-1106.1
1.342	-1105.6									1.342	-1062.4	1.342	-1065.6	1.342	-1068.6	1.342	-1071	1.342	-1077.6	1.342	-1083.5	1.342	-1088.2	1.342	-1094.4	1.342	-1100.1	1.342	-1105.6
1.343	-1105.3									1.343	-1062.4	1.343	-1065.5	1.343	-1068.9	1.343	-1071.1	1.343	-1077.5	1.343	-1083.3	1.343	-1088.6	1.343	-1094.3	1.343	-1100.4	1.343	-1105.3
1.344	-1104.9									1.344	-1062.2	1.344	-1065.2	1.344	-1068.6	1.344	-1070.9	1.344	-1077.4	1.344	-1083.4	1.344	-1087.8	1.344	-1094.2	1.344	-1100.6	1.344	-1104.9
1.345	-1104.8									1.345	-1062.2	1.345	-1065.1	1.345	-1068.9	1.345	-1071.4	1.345	-1077.8	1.345	-1083.1	1.345	-1088.2	1.345	-1094.2	1.345	-1100.4	1.345	-1104.8
1.346	-1104.7									1.346	-1061.5	1.346	-1065.4	1.346	-1068.8	1.346	-1070.9	1.346	-1077.2	1.346	-1082.6	1.346	-1087.4	1.346	-1094	1.346	-1100.5	1.346	-1104.7
1.347	-1105.3									1.347	-1061.3	1.347	-1065.1	1.347	-1068.6	1.347	-1071.2	1.347	-1077.7	1.347	-1082.1	1.347	-1087.5	1.347	-1094.5	1.347	-1100.6	1.347	-1105.3
1.348	-1104.6									1.348	-1061.3	1.348	-1065.5	1.348	-1068.4	1.348	-1071	1.348	-1077.9	1.348	-1082.6	1.348	-1087.3	1.348	-1095.3	1.348	-1100.4	1.348	-1104.6
1.349	-1105.6									1.349	-1061.5	1.349	-1065.8	1.349	-1068.4	1.349	-1071.4	1.349	-1077.7	1.349	-1082.7	1.349	-1087.5	1.349	-1095.2	1.349	-1100.5	1.349	-1105.6
1.35	-1105.4									1.35	-1061.6	1.35	-1065.4	1.35	-1068.4	1.35	-1071.2	1.35	-1077.4	1.35	-1083	1.35	-1087.2	1.35	-1094.5	1.35	-1099.9	1.35	-1105.4
1.351	-1105.8									1.351	-1061.4	1.351	-1065.4	1.351	-1068.6	1.351	-1071.5	1.351	-1077.5	1.351	-1082.8	1.351	-1087.7	1.351	-1095.1	1.351	-1100.3	1.351	-1105.8
1.352	-1105.6									1.352	-1060.6	1.352	-1066.1	1.352	-1068.5	1.352	-1071.2	1.352	-1077.5	1.352	-1083.1	1.352	-1087.7	1.352	-1094.8	1.352	-1099.5	1.352	-1105.6
1.353	-1106									1.353	-1061.1	1.353	-1065.6	1.353	-1068.1	1.353	-1071.3	1.353	-1077.4	1.353	-1082.5	1.353	-1087	1.353	-1094.9	1.353	-1099.6	1.353	-1106
1.354	-1106.1									1.354	-1061	1.354	-1065.7	1.354	-1068.5	1.354	-1070.3	1.354	-1077.1	1.354	-1083.5	1.354	-1087.4	1.354	-1094.6	1.354	-1099.1	1.354	-1106.1
1.355	-1106.3									1.355	-1060.5	1.355	-1066	1.355	-1068.6	1.355	-1070.5	1.355	-1077.4	1.355	-1079.3	1.355	-1087.3	1.355	-1094.5	1.355	-1099.6	1.355	-1106.3
1.356	-1106.3									1.356	-1060.9	1.356	-1066.2	1.356	-1067.8	1.356	-1070.6	1.356	-1076.6	1.356	-1080.3	1.356	-1087	1.356	-1094.2	1.356	-1099.1	1.356	-1106.3
1.357	-1107									1.357	-1061.2	1.357	-1065.9	1.357	-1068	1.357	-1070.8	1.357	-1076.8	1.357	-1079.3	1.357	-1087.1	1.357	-1094.4	1.357	-1099.1	1.357	-1107
1.358	-1106.5									1.358	-1060.1	1.358	-1065.5	1.358	-1067.5	1.358	-1069.9	1.358	-1076.8	1.358	-1080.4	1.358	-1087.2	1.358	-1093.9	1.358	-1098.2	1.358	-1106.5
1.359	-1106.3									1.359	-1060.4	1.359	-1065.8	1.359	-1067.9	1.359	-1069.9	1.359	-1077.2	1.359	-1081.7	1.359	-1087.2	1.359	-1093.7	1.359	-1098.7	1.359	-1106.3
1.36	-1106.5									1.36	-1059.9	1.36	-1065.3	1.36	-1067.9	1.36	-1069.4	1.36	-1077.1	1.36	-1082.7	1.36	-1087.3	1.36	-1094	1.36	-1098.9	1.36	-1106.5
1.361	-1107.1									1.361	-1060.3	1.361	-1065.5	1.361	-1068.4	1.361	-1069.6	1.361	-1077.3	1.361	-1082.3	1.361	-1087.8	1.361	-1094.1	1.361	-1098.4	1.361	-1107.1
1.362	-1106.9									1.362	-1060.3	1.362	-1065.1	1.362	-1067.7	1.362	-1069.8	1.362	-1076.9	1.362	-1082.4	1.362	-1088.4	1.362	-1094	1.362	-1097.9	1.362	-1106.9
1.363	-1107.2									1.363	-1060.5	1.363	-1065.1	1.363	-1068.1	1.363	-1070.1	1.363	-1077.1	1.363	-1081.7	1.363	-1088.2	1.363	-1093.7	1.363	-1099	1.363	-1107.2
1.364	-1107.5									1.364	-1060.3	1.364	-1065.1	1.364	-1068.1	1.364	-1069.7	1.364	-1077.5	1.364	-1082.1	1.364	-1088.2	1.364	-1093.6	1.364	-1098.8	1.364	-1107.5
1.365	-1107.8									1.365	-1060.9	1.365	-1064.8	1.365	-1068.3	1.365	-1069.8	1.365	-1077.3	1.365	-1081.4	1.365	-1089	1.365	-1093.3	1.365	-1099	1.365	-1107.8
1.366	-1108									1.366	-1061.3	1.366	-1064.5	1.366	-1068.1	1.366	-1069.7	1.366	-1076.4	1.366	-1081.4	1.366	-1089	1.366	-1093.1	1.366	-1099	1.366	-1108
1.367	-1108									1.367	-1061.2	1.367	-1064.4	1.367	-1067.7	1.367	-1069.8	1.367	-1076.9	1.367	-1081.2	1.367	-1089.9	1.367	-1092.6	1.367	-1099.3	1.367	-1108
1.368	-1106.5									1.368	-1061.1	1.368	-1064.3	1.368	-1067.6	1.368	-1068.9	1.368	-1076.4	1.368	-1082	1.368	-1089.3	1.368	-1092.9	1.368	-1098.8	1.368	-1106.5
1.369	-1106.1									1.369	-1060.5	1.369	-1064.3	1.369	-1067.7	1.369	-1069.7	1.369	-1076.7	1.369	-1081.7	1.369	-1089.1	1.369	-1093.1	1.369	-1099.2	1.369	-1106.1
1.37	-1106.3									1.37	-1060.1	1.37	-1064.4	1.37	-1067.4	1.37	-1068.7	1.37	-1076.5	1.37	-1081.8	1.37	-1088.6	1.37	-1093	1.37	-1098.9	1.37	-1106.3
1.371	-1106.1									1.371	-1060.8	1.371	-1064.6	1.371	-1067.9	1.371	-1069.2	1.371	-1077.1	1.371	-1081	1.371	-1088.4	1.371	-1093.5	1.371	-1099.4	1.371	-1106.1
1.372	-1106.4									1.372	-1060.5	1.372	-1064.3	1.372	-1067	1.372	-1069	1.372	-1076	1.372	-1081.1	1.372	-1088.4	1.372	-1092	1.372	-1097.5	1.372	-1106.4
1.373	-1105.8									1.373	-1061.5	1.373	-1064.3	1.373	-1067.7	1.373	-1069.4	1.373	-1076.5	1.373	-1081.2	1.373	-1088.3	1.373	-1092.8	1.373	-1098.5	1.373	-1105.8
1.374	-1104.7									1.374	-1060.9	1.374	-1064.3	1.374	-1067.7	1.374	-1068.7	1.374	-1075.8	1.374	-1081.9	1.374	-1088.2	1.374	-1091.9	1.374	-1098.4	1.374	-1104.7
1.375	-1105.2									1.375	-1061.2	1.375	-1064.2	1.375	-1067.5	1.375	-1069.4	1.375	-1076	1.375	-1081	1.375	-1088.8	1.375	-1092.9	1.375	-1098	1.375	-1105.2
1.376	-1104.9									1.376	-1060.7	1.376	-1063.8	1.376	-1066.7	1.376	-1068.4	1.376	-1075.9	1.376	-1081.2	1.376	-1089.2	1.376	-1092.7	1.376	-1097.9	1.376	-1104.9
1.377	-1105									1.377	-1060.9	1.377	-1064.6	1.377	-1067.7	1.377	-1069.1	1.377	-1076.8	1.377	-1081.9	1.377	-1089.7	1.377	-1093.5	1.377	-1098.3	1.377	-1105
1.378	-1105									1.378	-1060.7	1.378	-1063.8	1.378	-1067.2	1.378	-1069.2	1.378	-1076	1.378	-1080.6	1.378	-1089.8	1.378	-1094.3	1.378	-1097.8	1.378	-1105
1.379	-1104.8									1.379	-1061.1	1.379	-1064.7	1.379	-1067.8	1.379	-1069	1.379	-1076.1	1.379	-1080.9	1.379	-1089.7	1.379	-1094	1.379	-1098	1.379	-1104.8
1.38	-1102.6									1.38	-1060.2	1.38	-1063.6	1.38	-1067.7	1.38	-1068.9	1.38	-1076.4	1.38	-1080.1	1.38	-1089.5	1.38	-1093.6	1.38	-1097.6	1.38	-1102.6
1.381	-1102.7									1.381	-1060.8	1.381	-1064.3	1.381	-1067.7	1.381	-1069.1	1.381	-1076.5	1.381	-1080.1	1.381	-1089.6	1.381	-1093.7	1.381	-1098.1	1.381	-1102.7
1.382	-1102.1									1.382	-1060.3	1.382	-1063.4	1.382	-1067.9	1.382	-1068.9	1.382	-1076.4	1.382	-1080.3	1.382	-1090.1	1.382	-1093.6	1.382	-1097.5	1.382	-1102.1
1.383	-1102.6									1.383	-1060.6	1.383	-1064.6	1.383	-1068	1.383	-1069.1	1.383	-1076.7	1.383	-1080.9	1.383	-1090.9	1.383	-1093.6	1.383	-1097.6	1.383	-1102.6
1.384	-1101.9									1.384	-1060.1	1.384	-1063.9	1.384	-1067.1	1.384	-1068.6	1.384	-1076.3	1.384	-1080.6	1.384	-1090	1.384	-1093.4	1.384	-1097.1	1.384	-1101.9
1.385	-1102.3									1.385	-1060.2	1.385	-1063.9	1.385	-1067.7	1.385	-1069.1	1.385	-1075.4	1.385	-1080.5	1.385	-1090.8	1.385	-1093.6	1.385	-1097.6	1.385	-1102.3
1.386	-1102									1.386	-1060.1	1.386	-1063.5	1.386	-1067	1.386	-1069	1.386	-1075	1.386	-1080.8	1.386	-1090.7	1.386	-1093.3	1.386	-1097.4	1.386	-1102
1.387	-1101.7									1.387	-1060.1	1.387	-1063.8	1.387	-1067.5	1.387	-1069.2	1.387	-1075.6	1.387	-1080.7	1.387	-1091.3	1.387	-1094.2	1.387	-1097.3	1.387	-1101.7
1.388	-1101.2									1.388	-1060	1.388	-1063.7	1.388	-1067.1	1.388	-1069.1	1.388	-1075.2	1.388	-1080.8	1.388	-1090.4	1.388	-1093.9	1.388	-1096.3	1.388	-1101.2
1.389	-1101.4									1.389	-1060.7	1.389	-1064.2	1.389	-1066.6	1.389	-1069.4	1.389	-1075.8	1.389	-1080.4	1.389	-1089.6	1.389	-1094.4	1.389	-1096.9	1.389	-1101.4
1.39	-1101.5									1.39	-1060.1	1.39	-1063.7	1.39	-1066.6	1.39	-1069.1	1.39	-1075.5	1.39	-1080.8	1.39	-1089.4	1.39	-1093.8	1.39	-1096.9	1.39	-1101.5
1.391	-1101.6									1.391	-1060.3	1.391	-1064.2	1.391	-1067.1	1.391	-1069.5	1.391	-1076.1	1.391	-1080.7	1.391	-1090.7	1.391	-1093.9	1.391	-1096.9	1.391	-1101.6
1.392	-1101.2									1.392	-1060.4	1.392	-1063.7	1.392	-1066.9	1.392	-1069.3	1.392	-1074.9	1.392	-1080.6	1.392	-1089.1	1.392	-1093.7	1.392	-1096.7	1.392	-1101.2
1.393	-1102.4									1.393	-1060.7	1.393	-1064.3	1.393	-1066.7	1.393	-1068.9	1.393	-1075.9	1.393	-1080.5	1.393	-1090	1.393	-1093.9	1.393	-1097.3	1.393	-1102.4
1.394	-1102.1									1.394	-1061.1	1.394	-1063.8	1.394	-1066.7	1.394	-1069	1.394	-1075.4	1.394	-1081	1.394	-1090.5	1.394	-1094.2	1.394	-1097	1.394	-1102.1
1.395	-1102.2									1.395	-1060.9	1.395	-1064.5	1.395	-1067.3	1.395	-1069.4	1.395	-1075.4	1.395	-1080.1	1.395	-1090.5	1.395	-1094.5	1.395	-1097.5	1.395	-1102.2
1.396	-1102.3									1.396	-1060.9	1.396	-1064.2	1.396	-1066.7	1.396	-1069	1.396	-1074.8	1.396	-1079.7	1.396	-1090.1	1.396	-1094.6	1.396	-1097.1	1.396	-1102.3
1.397	-1102.8									1.397	-1060.9	1.397	-1064.1	1.397	-1067.2	1.397	-1069.5	1.397	-1074.7	1.397	-1080	1.397	-1090.5	1.397	-1093.7	1.397	-1097.7	1.397	-1102.8
1.398	-1102.2									1.398	-1061.2	1.398	-1063.8	1.398	-1066.5	1.398	-1069.1	1.398	-1074.7	1.398	-1080.6	1.398	-1089.7	1.398	-1093.5	1.398	-1097.4	1.398	-1102.2
1.399	-1103.2									1.399	-1060.6	1.399	-1064	1.399	-1067.1	1.399	-1069.2	1.399	-1075.4	1.399	-1079.9	1.399	-1090.3	1.399	-1094.2	1.399	-1097.8	1.399	-1103.2
1.4	-1102.9									1.4	-1060.9	1.4	-1064.3	1.4	-1067.1	1.4	-1069	1.4	-1074.5	1.4	-1080.5	1.4	-1089.9	1.4	-1093.6	1.4	-1098.5	1.4	-1102.9
1.401	-1103.8									1.401	-1061.4	1.401	-1063.8	1.401	-1067.5	1.401	-1069.4	1.401	-1074.5	1.401	-1080.3	1.401	-1089.8	1.401	-1093.6	1.401	-1098.5	1.401	-1103.8
1.402	-1102.7									1.402	-1061.3	1.402	-1063.3	1.402	-1066.8	1.402	-1069.2	1.402	-1074.4	1.402	-1080.6	1.402	-1089.9	1.402	-1093.3	1.402	-1098.5	1.402	-1102.7
1.403	-1103.6									1.403	-1061.1	1.403	-1063.4	1.403	-1067	1.403	-1069.1	1.403	-1074.9	1.403	-1080.1	1.403	-1090	1.403	-1093.9	1.403	-1098.6	1.403	-1103.6
1.404	-1102.6									1.404	-1061.3	1.404	-1062.7	1.404	-1067.4	1.404	-1068.9	1.404	-1074.5	1.404	-1080.8	1.404	-1089.3	1.404	-1093.5	1.404	-1097.9	1.404	-1102.6
1.405	-1103.6									1.405	-1061.5	1.405	-1063.1	1.405	-1066.9	1.405	-1069.1	1.405	-1074.7	1.405	-1080.2	1.405	-1089.6	1.405	-1094.3	1.405	-1098.2	1.405	-1103.6
1.406	-1103.5									1.406	-1061.4	1.406	-1063.2	1.406	-1066.9	1.406	-1069.1	1.406	-1074.3	1.406	-1080.5	1.406	-1089.3	1.406	-1093.6	1.406	-1098.5	1.406	-1103.5
1.407	-1104.3									1.407	-1061.3	1.407	-1063.2	1.407	-1067.2	1.407	-1069.2	1.407	-1074.6	1.407	-1080.5	1.407	-1089.5	1.407	-1094.2	1.407	-1099.1	1.407	-1104.3
1.408	-1103.2									1.408	-1061.6	1.408	-1062.9	1.408	-1066.5	1.408	-1068.6	1.408	-1074	1.408	-1080.5	1.408	-1089.1	1.408	-1094.5	1.408	-1099	1.408	-1103.2
1.409	-1103.5									1.409	-1061.3	1.409	-1063.5	1.409	-1066.3	1.409	-1069	1.409	-1075	1.409	-1080.9	1.409	-1089.1	1.409	-1094.6	1.409	-1099.8	1.409	-1103.5
1.41	-1103.9									1.41	-1061.4	1.41	-1062.9	1.41	-1066.1	1.41	-1068.7	1.41	-1074.3	1.41	-1080.8	1.41	-1089	1.41	-1094.2	1.41	-1099.8	1.41	-1103.9
1.411	-1103.5									1.411	-1062.5	1.411	-1062.6	1.411	-1066.4	1.411	-1069	1.411	-1074.5	1.411	-1080.8	1.411	-1089.4	1.411	-1095.1	1.411	-1099.8	1.411	-1103.5
1.412	-1103.5									1.412	-1061.8	1.412	-1063.1	1.412	-1066.8	1.412	-1068.5	1.412	-1074.1	1.412	-1081	1.412	-1089	1.412	-1094.2	1.412	-1099.9	1.412	-1103.5
1.413	-1103.4									1.413	-1062.1	1.413	-1063.7	1.413	-1066.6	1.413	-1068.9	1.413	-1074.3	1.413	-1080.3	1.413	-1089.1	1.413	-1095	1.413	-1099.6	1.413	-1103.4
1.414	-1103.4									1.414	-1061.2	1.414	-1062.3	1.414	-1066.1	1.414	-1068.5	1.414	-1073.4	1.414	-1081.4	1.414	-1088.1	1.414	-1093.7	1.414	-1099.4	1.414	-1103.4
1.415	-1103.2									1.415	-1061.1	1.415	-1062.5	1.415	-1066.2	1.415	-1069	1.415	-1074.3	1.415	-1080.7	1.415	-1088.9	1.415	-1094.2	1.415	-1100	1.415	-1103.2
1.416	-1102.9									1.416	-1061.6	1.416	-1062.4	1.416	-1066.4	1.416	-1068	1.416	-1073.3	1.416	-1081	1.416	-1088.4	1.416	-1093.8	1.416	-1098.7	1.416	-1102.9
1.417	-1102.9									1.417	-1061.3	1.417	-1063.2	1.417	-1066.7	1.417	-1068.1	1.417	-1074.7	1.417	-1080.8	1.417	-1088.3	1.417	-1093.8	1.417	-1099.1	1.417	-1102.9
1.418	-1103.2									1.418	-1061.2	1.418	-1062.7	1.418	-1066.5	1.418	-1068.5	1.418	-1074	1.418	-1081.5	1.418	-1087.8	1.418	-1092.9	1.418	-1099.3	1.418	-1103.2
1.419	-1103.1									1.419	-1061.7	1.419	-1063.4	1.419	-1066.5	1.419	-1068.9	1.419	-1074.6	1.419	-1080.5	1.419	-1088.1	1.419	-1093	1.419	-1099.1	1.419	-1103.1
1.42	-1102.6									1.42	-1061.3	1.42	-1062.2	1.42	-1066.3	1.42	-1068.5	1.42	-1074.3	1.42	-1080.9	1.42	-1087.7	1.42	-1092.8	1.42	-1099	1.42	-1102.6
1.421	-1103.7									1.421	-1062.1	1.421	-1063.3	1.421	-1065.8	1.421	-1068.4	1.421	-1074.1	1.421	-1079.8	1.421	-1088.8	1.421	-1093.6	1.421	-1098.7	1.421	-1103.7
1.422	-1102.9									1.422	-1061.7	1.422	-1063	1.422	-1065.7	1.422	-1068.6	1.422	-1074	1.422	-1080.2	1.422	-1087.1	1.422	-1092.6	1.422	-1098	1.422	-1102.9
1.423	-1102.9									1.423	-1062.2	1.423	-1063.2	1.423	-1066.4	1.423	-1068.3	1.423	-1074.5	1.423	-1079.9	1.423	-1087	1.423	-1092.2	1.423	-1098.1	1.423	-1102.9
1.424	-1102.9									1.424	-1062	1.424	-1062.7	1.424	-1066.4	1.424	-1068.6	1.424	-1074.1	1.424	-1080.5	1.424	-1086.7	1.424	-1092	1.424	-1097.8	1.424	-1102.9
1.425	-1103.2									1.425	-1062.3	1.425	-1063.4	1.425	-1066.3	1.425	-1068.9	1.425	-1074.4	1.425	-1080.3	1.425	-1087	1.425	-1093	1.425	-1098.4	1.425	-1103.2
1.426	-1103.4									1.426	-1062	1.426	-1062.8	1.426	-1065.9	1.426	-1068.2	1.426	-1074	1.426	-1079.4	1.426	-1087.2	1.426	-1092.3	1.426	-1098.3	1.426	-1103.4
1.427	-1103.8									1.427	-1062.2	1.427	-1063.3	1.427	-1066.1	1.427	-1069	1.427	-1073.6	1.427	-1079.3	1.427	-1087.2	1.427	-1092.3	1.427	-1098.3	1.427	-1103.8
1.428	-1104									1.428	-1061.9	1.428	-1063.2	1.428	-1065.9	1.428	-1068.9	1.428	-1073.5	1.428	-1079.3	1.428	-1086.6	1.428	-1092	1.428	-1097.3	1.428	-1104
1.429	-1105									1.429	-1061.6	1.429	-1063.8	1.429	-1065.8	1.429	-1069.2	1.429	-1073.6	1.429	-1079.5	1.429	-1086.5	1.429	-1092.1	1.429	-1097.5	1.429	-1105
1.43	-1105.1									1.43	-1061.4	1.43	-1063.5	1.43	-1065.9	1.43	-1069.3	1.43	-1073.5	1.43	-1079.4	1.43	-1086.5	1.43	-1091.8	1.43	-1097.9	1.43	-1105.1
1.431	-1105.6									1.431	-1061.4	1.431	-1064.4	1.431	-1065.9	1.431	-1069.9	1.431	-1073.8	1.431	-1079.3	1.431	-1086.2	1.431	-1092.2	1.431	-1097.4	1.431	-1105.6
1.432	-1105.1									1.432	-1061.4	1.432	-1063.7	1.432	-1066.3	1.432	-1069.6	1.432	-1073.4	1.432	-1079.1	1.432	-1087.1	1.432	-1091.8	1.432	-1097.4	1.432	-1105.1
1.433	-1105.6									1.433	-1061.7	1.433	-1064.1	1.433	-1066.1	1.433	-1069.3	1.433	-1073.4	1.433	-1079	1.433	-1086.7	1.433	-1092.3	1.433	-1097.5	1.433	-1105.6
1.434	-1104.7									1.434	-1061.5	1.434	-1063.7	1.434	-1066.4	1.434	-1069.5	1.434	-1073.9	1.434	-1079	1.434	-1086.4	1.434	-1091.8	1.434	-1097.2	1.434	-1104.7
1.435	-1105.9									1.435	-1061.7	1.435	-1064.3	1.435	-1066.7	1.435	-1069.3	1.435	-1073.7	1.435	-1078.9	1.435	-1087.5	1.435	-1092	1.435	-1097.9	1.435	-1105.9
1.436	-1104.9									1.436	-1061.8	1.436	-1064.4	1.436	-1066.6	1.436	-1069.6	1.436	-1073.5	1.436	-1079.2	1.436	-1087.2	1.436	-1091.9	1.436	-1098.2	1.436	-1104.9
1.437	-1105.5									1.437	-1062.1	1.437	-1063.9	1.437	-1067.3	1.437	-1070.3	1.437	-1073.6	1.437	-1079.3	1.437	-1087.1	1.437	-1092.6	1.437	-1097.7	1.437	-1105.5
1.438	-1105.8									1.438	-1061.1	1.438	-1063.9	1.438	-1066.8	1.438	-1069.2	1.438	-1073.8	1.438	-1079.9	1.438	-1087.4	1.438	-1092.1	1.438	-1097.6	1.438	-1105.8
1.439	-1105.5									1.439	-1061.3	1.439	-1064.3	1.439	-1067.1	1.439	-1069.1	1.439	-1073.5	1.439	-1080.3	1.439	-1087.8	1.439	-1092.3	1.439	-1097.5	1.439	-1105.5
1.44	-1104.8									1.44	-1061.4	1.44	-1064.3	1.44	-1067	1.44	-1070	1.44	-1074.2	1.44	-1080.6	1.44	-1088.3	1.44	-1092.6	1.44	-1097.3	1.44	-1104.8
1.441	-1105									1.441	-1061.6	1.441	-1064.5	1.441	-1067.3	1.441	-1069.3	1.441	-1073.9	1.441	-1079.7	1.441	-1088.2	1.441	-1091.9	1.441	-1097.6	1.441	-1105
1.442	-1104.8									1.442	-1061.4	1.442	-1064.2	1.442	-1067.2	1.442	-1069.6	1.442	-1073.9	1.442	-1080.4	1.442	-1087.6	1.442	-1091.8	1.442	-1097.8	1.442	-1104.8
1.443	-1104.8									1.443	-1061.4	1.443	-1064.1	1.443	-1067.4	1.443	-1070.1	1.443	-1073.8	1.443	-1080.3	1.443	-1087.1	1.443	-1092.1	1.443	-1097	1.443	-1104.8
1.444	-1104.3									1.444	-1061.5	1.444	-1063.6	1.444	-1067.7	1.444	-1069.2	1.444	-1074.1	1.444	-1081.2	1.444	-1086.9	1.444	-1092.3	1.444	-1097.4	1.444	-1104.3
1.445	-1104.2									1.445	-1061.1	1.445	-1063.9	1.445	-1067.5	1.445	-1069.6	1.445	-1074.1	1.445	-1080.3	1.445	-1086.3	1.445	-1092.2	1.445	-1096.6	1.445	-1104.2
1.446	-1104.1									1.446	-1061.3	1.446	-1063.3	1.446	-1067.6	1.446	-1069.5	1.446	-1073.8	1.446	-1079.6	1.446	-1086.9	1.446	-1092.2	1.446	-1096.3	1.446	-1104.1
1.447	-1104.1									1.447	-1061.3	1.447	-1063.1	1.447	-1068.6	1.447	-1069.4	1.447	-1073.4	1.447	-1079.1	1.447	-1086	1.447	-1092.2	1.447	-1096.3	1.447	-1104.1
1.448	-1104.1									1.448	-1061.5	1.448	-1063.1	1.448	-1067.3	1.448	-1069.7	1.448	-1073	1.448	-1078.3	1.448	-1086.4	1.448	-1092.1	1.448	-1095.4	1.448	-1104.1
1.449	-1104.3									1.449	-1061	1.449	-1063.3	1.449	-1067.9	1.449	-1069.4	1.449	-1073.4	1.449	-1077.9	1.449	-1086.1	1.449	-1091.5	1.449	-1095.6	1.449	-1104.3
1.45	-1104.4									1.45	-1061.5	1.45	-1062.9	1.45	-1068.1	1.45	-1069.8	1.45	-1073	1.45	-1078.6	1.45	-1086.1	1.45	-1092.9	1.45	-1095.9	1.45	-1104.4
1.451	-1103.2									1.451	-1061.1	1.451	-1063.1	1.451	-1067.9	1.451	-1069.9	1.451	-1073	1.451	-1077.4	1.451	-1086.2	1.451	-1092	1.451	-1095.7	1.451	-1103.2
1.452	-1102.8									1.452	-1061.3	1.452	-1063	1.452	-1068.1	1.452	-1070	1.452	-1072.7	1.452	-1077.9	1.452	-1086.4	1.452	-1092	1.452	-1095.5	1.452	-1102.8
1.453	-1102.8									1.453	-1061.2	1.453	-1063.5	1.453	-1067.9	1.453	-1071.2	1.453	-1072.6	1.453	-1077.6	1.453	-1086.4	1.453	-1091.5	1.453	-1095.2	1.453	-1102.8
1.454	-1102.7									1.454	-1060.9	1.454	-1063.2	1.454	-1067.5	1.454	-1071.9	1.454	-1072.5	1.454	-1077.2	1.454	-1086.1	1.454	-1091.8	1.454	-1095.6	1.454	-1102.7
1.455	-1102.9									1.455	-1062	1.455	-1063.6	1.455	-1068.1	1.455	-1072.4	1.455	-1072.2	1.455	-1077.3	1.455	-1086.1	1.455	-1091.8	1.455	-1095.2	1.455	-1102.9
1.456	-1102.2									1.456	-1061.5	1.456	-1063.6	1.456	-1068.2	1.456	-1071.5	1.456	-1072.4	1.456	-1077.2	1.456	-1086	1.456	-1091.7	1.456	-1095.3	1.456	-1102.2
1.457	-1102.2									1.457	-1061.3	1.457	-1064	1.457	-1068.5	1.457	-1070.7	1.457	-1072.8	1.457	-1077.2	1.457	-1087	1.457	-1091.5	1.457	-1095.8	1.457	-1102.2
1.458	-1102.8									1.458	-1061.6	1.458	-1064.2	1.458	-1068.3	1.458	-1070.1	1.458	-1073.9	1.458	-1076.1	1.458	-1086.5	1.458	-1091	1.458	-1095.3	1.458	-1102.8
1.459	-1102.2									1.459	-1062.2	1.459	-1064.9	1.459	-1067.9	1.459	-1070.1	1.459	-1072.8	1.459	-1076.3	1.459	-1086.3	1.459	-1090.5	1.459	-1095	1.459	-1102.2
1.46	-1102.5									1.46	-1062.2	1.46	-1065.3	1.46	-1067.3	1.46	-1070.6	1.46	-1073.1	1.46	-1076.4	1.46	-1085.8	1.46	-1091	1.46	-1095.4	1.46	-1102.5
1.461	-1102.5									1.461	-1062.2	1.461	-1065.6	1.461	-1067.2	1.461	-1069.8	1.461	-1073.4	1.461	-1076.9	1.461	-1085.9	1.461	-1090.7	1.461	-1095.7	1.461	-1102.5
1.462	-1102.5									1.462	-1062.3	1.462	-1065.9	1.462	-1067.8	1.462	-1070.7	1.462	-1073.5	1.462	-1077.2	1.462	-1085.6	1.462	-1090.6	1.462	-1095.1	1.462	-1102.5
1.463	-1102.2									1.463	-1062.6	1.463	-1065.3	1.463	-1068.1	1.463	-1070.6	1.463	-1074	1.463	-1076.4	1.463	-1085.6	1.463	-1090.9	1.463	-1095.2	1.463	-1102.2
1.464	-1102.1									1.464	-1062.5	1.464	-1066.2	1.464	-1067.9	1.464	-1069.7	1.464	-1074.1	1.464	-1076.4	1.464	-1085.3	1.464	-1091.3	1.464	-1094.8	1.464	-1102.1
1.465	-1102.1									1.465	-1062.3	1.465	-1066.2	1.465	-1067.9	1.465	-1070.3	1.465	-1074.6	1.465	-1075.1	1.465	-1086	1.465	-1091.4	1.465	-1095.1	1.465	-1102.1
1.466	-1102.4									1.466	-1062.7	1.466	-1064.5	1.466	-1068.3	1.466	-1070.3	1.466	-1075	1.466	-1075.5	1.466	-1085.6	1.466	-1091.8	1.466	-1095.2	1.466	-1102.4
1.467	-1101.6									1.467	-1062.2	1.467	-1064.9	1.467	-1067.9	1.467	-1070.3	1.467	-1075.4	1.467	-1075.2	1.467	-1085.5	1.467	-1091.7	1.467	-1095.2	1.467	-1101.6
1.468	-1102.2									1.468	-1062.5	1.468	-1064.5	1.468	-1066.9	1.468	-1070.2	1.468	-1075.2	1.468	-1075	1.468	-1085.1	1.468	-1091.2	1.468	-1095.1	1.468	-1102.2
1.469	-1101.7									1.469	-1062.7	1.469	-1064.9	1.469	-1067.5	1.469	-1070.5	1.469	-1075	1.469	-1075.5	1.469	-1085.1	1.469	-1091.7	1.469	-1094.9	1.469	-1101.7
1.47	-1102									1.47	-1062.6	1.47	-1064.4	1.47	-1068.1	1.47	-1070.9	1.47	-1075.5	1.47	-1075.8	1.47	-1084.2	1.47	-1091.5	1.47	-1094.9	1.47	-1102
1.471	-1102.2									1.471	-1063	1.471	-1064.2	1.471	-1067.8	1.471	-1070.4	1.471	-1075.1	1.471	-1075.7	1.471	-1085.3	1.471	-1091.7	1.471	-1094.8	1.471	-1102.2
1.472	-1102.2									1.472	-1062.5	1.472	-1064.3	1.472	-1068.1	1.472	-1070.7	1.472	-1074.6	1.472	-1076.1	1.472	-1084.7	1.472	-1092.4	1.472	-1094.8	1.472	-1102.2
1.473	-1102.2									1.473	-1062.8	1.473	-1064.1	1.473	-1067.9	1.473	-1070.3	1.473	-1074.6	1.473	-1076.5	1.473	-1084.4	1.473	-1091	1.473	-1094.5	1.473	-1102.2
1.474	-1102									1.474	-1062.6	1.474	-1064.2	1.474	-1067.8	1.474	-1070	1.474	-1075.1	1.474	-1076.5	1.474	-1084.2	1.474	-1091.4	1.474	-1094.7	1.474	-1102
1.475	-1102									1.475	-1062.7	1.475	-1064.5	1.475	-1068	1.475	-1070.4	1.475	-1074.8	1.475	-1076.6	1.475	-1084.8	1.475	-1092.2	1.475	-1094.5	1.475	-1102
1.476	-1102.7									1.476	-1062.9	1.476	-1064.2	1.476	-1067.8	1.476	-1070.4	1.476	-1075.2	1.476	-1076.3	1.476	-1085	1.476	-1091.7	1.476	-1094.4	1.476	-1102.7
1.477	-1102.7									1.477	-1063	1.477	-1064.4	1.477	-1068.3	1.477	-1070.4	1.477	-1074.8	1.477	-1076.5	1.477	-1084.7	1.477	-1092.5	1.477	-1094.3	1.477	-1102.7
1.478	-1103.2									1.478	-1063	1.478	-1064.4	1.478	-1068	1.478	-1070.5	1.478	-1075.2	1.478	-1076.6	1.478	-1084.8	1.478	-1092.9	1.478	-1094.2	1.478	-1103.2
1.479	-1103.3									1.479	-1063	1.479	-1064.2	1.479	-1068.4	1.479	-1070.7	1.479	-1075.2	1.479	-1076.9	1.479	-1084	1.479	-1093.1	1.479	-1094.5	1.479	-1103.3
1.48	-1102.7									1.48	-1063	1.48	-1064.8	1.48	-1068.2	1.48	-1070.4	1.48	-1075	1.48	-1076.5	1.48	-1084.1	1.48	-1092	1.48	-1094.5	1.48	-1102.7
1.481	-1103.9									1.481	-1063.5	1.481	-1064.9	1.481	-1068.2	1.481	-1070.5	1.481	-1075.5	1.481	-1076.4	1.481	-1084.2	1.481	-1091.9	1.481	-1094.3	1.481	-1103.9
1.482	-1101.6									1.482	-1063.6	1.482	-1065.3	1.482	-1068.6	1.482	-1070.4	1.482	-1075.4	1.482	-1076.7	1.482	-1085	1.482	-1092	1.482	-1093.8	1.482	-1101.6
1.483	-1101.5									1.483	-1063.8	1.483	-1064.6	1.483	-1068.5	1.483	-1070.7	1.483	-1075.5	1.483	-1077	1.483	-1084.7	1.483	-1092.5	1.483	-1093.8	1.483	-1101.5
1.484	-1101.1									1.484	-1063.4	1.484	-1064.9	1.484	-1068.1	1.484	-1070.7	1.484	-1075.3	1.484	-1077.3	1.484	-1085	1.484	-1092.7	1.484	-1094	1.484	-1101.1
1.485	-1101.4									1.485	-1064.1	1.485	-1064.8	1.485	-1068.7	1.485	-1069.9	1.485	-1075.3	1.485	-1077.7	1.485	-1084.4	1.485	-1093.3	1.485	-1094	1.485	-1101.4
1.486	-1101.4									1.486	-1062.6	1.486	-1065.1	1.486	-1068.9	1.486	-1070.1	1.486	-1075	1.486	-1077	1.486	-1085	1.486	-1092.9	1.486	-1093.7	1.486	-1101.4
1.487	-1101									1.487	-1064.3	1.487	-1064.9	1.487	-1068.9	1.487	-1070.7	1.487	-1074.7	1.487	-1077.3	1.487	-1084.9	1.487	-1093.6	1.487	-1093.8	1.487	-1101
1.488	-1100.5									1.488	-1063.5	1.488	-1065.4	1.488	-1068.9	1.488	-1070.9	1.488	-1075	1.488	-1078	1.488	-1085.1	1.488	-1093.1	1.488	-1093.2	1.488	-1100.5
1.489	-1100.5									1.489	-1063.2	1.489	-1065.2	1.489	-1069.1	1.489	-1070.9	1.489	-1075.1	1.489	-1078.1	1.489	-1084.9	1.489	-1093.2	1.489	-1093.3	1.489	-1100.5
1.49	-1100.6									1.49	-1063.3	1.49	-1065.4	1.49	-1069	1.49	-1070.8	1.49	-1075.4	1.49	-1078	1.49	-1084.8	1.49	-1091	1.49	-1093.3	1.49	-1100.6
1.491	-1100.4									1.491	-1062.8	1.491	-1065.2	1.491	-1068.5	1.491	-1070.5	1.491	-1074.8	1.491	-1078.3	1.491	-1085.1	1.491	-1092.3	1.491	-1093.7	1.491	-1100.4
1.492	-1100									1.492	-1063.7	1.492	-1065.6	1.492	-1068.5	1.492	-1070.7	1.492	-1074.9	1.492	-1078.7	1.492	-1085.1	1.492	-1092.4	1.492	-1093.9	1.492	-1100
1.493	-1100.3									1.493	-1062.9	1.493	-1065.6	1.493	-1069	1.493	-1071.2	1.493	-1075	1.493	-1078.5	1.493	-1085.2	1.493	-1092	1.493	-1094	1.493	-1100.3
1.494	-1099.5									1.494	-1063.3	1.494	-1065.4	1.494	-1068.7	1.494	-1070.7	1.494	-1075	1.494	-1078.7	1.494	-1085.1	1.494	-1091.3	1.494	-1094.1	1.494	-1099.5
1.495	-1099.7									1.495	-1063.5	1.495	-1065.2	1.495	-1069.1	1.495	-1070.3	1.495	-1075.1	1.495	-1078.3	1.495	-1085.3	1.495	-1091.3	1.495	-1094.1	1.495	-1099.7
1.496	-1099.8									1.496	-1064	1.496	-1065.2	1.496	-1069.1	1.496	-1070.4	1.496	-1074.8	1.496	-1079.1	1.496	-1084.1	1.496	-1092.2	1.496	-1093.7	1.496	-1099.8
1.497	-1099.7									1.497	-1063.5	1.497	-1065.4	1.497	-1069.2	1.497	-1070.7	1.497	-1075	1.497	-1079	1.497	-1084	1.497	-1091.4	1.497	-1094.7	1.497	-1099.7
1.498	-1100									1.498	-1063.5	1.498	-1065.3	1.498	-1068.4	1.498	-1070.4	1.498	-1074.5	1.498	-1079.4	1.498	-1083.9	1.498	-1090.5	1.498	-1094.2	1.498	-1100
1.499	-1099.9									1.499	-1063.4	1.499	-1065.2	1.499	-1068.3	1.499	-1071.1	1.499	-1074.6	1.499	-1079	1.499	-1083.7	1.499	-1091	1.499	-1094.2	1.499	-1099.9
1.5	-1099.5									1.5	-1063.8	1.5	-1065.6	1.5	-1068	1.5	-1071.1	1.5	-1074.7	1.5	-1079.6	1.5	-1084.6	1.5	-1090.7	1.5	-1093.7	1.5	-1099.5
1.501	-1099.3									1.501	-1064	1.501	-1065.5	1.501	-1068.5	1.501	-1071.2	1.501	-1074.3	1.501	-1079	1.501	-1084.7	1.501	-1091	1.501	-1093.7	1.501	-1099.3
1.502	-1099.1									1.502	-1064.3	1.502	-1065.8	1.502	-1068.1	1.502	-1071.3	1.502	-1074.1	1.502	-1078.7	1.502	-1084.8	1.502	-1091.3	1.502	-1093.8	1.502	-1099.1
1.503	-1099.2									1.503	-1064.2	1.503	-1065.4	1.503	-1068.6	1.503	-1071.8	1.503	-1073.9	1.503	-1077.7	1.503	-1085	1.503	-1091.2	1.503	-1094.2	1.503	-1099.2
1.504	-1099.5									1.504	-1064.4	1.504	-1065.6	1.504	-1068.1	1.504	-1072	1.504	-1073.9	1.504	-1078.2	1.504	-1083.6	1.504	-1091.3	1.504	-1094.1	1.504	-1099.5
1.505	-1099.9									1.505	-1064	1.505	-1065.9	1.505	-1068.3	1.505	-1071.4	1.505	-1074.2	1.505	-1077.9	1.505	-1083.7	1.505	-1091.3	1.505	-1094.1	1.505	-1099.9
1.506	-1100.7									1.506	-1064	1.506	-1065.4	1.506	-1068.3	1.506	-1071.2	1.506	-1074.4	1.506	-1077.3	1.506	-1084	1.506	-1091.1	1.506	-1094	1.506	-1100.7
1.507	-1100.7									1.507	-1064.1	1.507	-1065.8	1.507	-1068.6	1.507	-1071.1	1.507	-1074.8	1.507	-1077.9	1.507	-1083.7	1.507	-1091.6	1.507	-1093.8	1.507	-1100.7
1.508	-1100.1									1.508	-1064	1.508	-1066	1.508	-1068.4	1.508	-1071.3	1.508	-1074.2	1.508	-1077.9	1.508	-1083.6	1.508	-1091.7	1.508	-1093.4	1.508	-1100.1
1.509	-1099.9									1.509	-1064	1.509	-1066.1	1.509	-1068.4	1.509	-1070.7	1.509	-1074.7	1.509	-1078.1	1.509	-1083.4	1.509	-1091.5	1.509	-1094	1.509	-1099.9
1.51	-1099.6									1.51	-1063.4	1.51	-1065.8	1.51	-1067.9	1.51	-1070.4	1.51	-1074.6	1.51	-1078.2	1.51	-1083.3	1.51	-1090.7	1.51	-1093.8	1.51	-1099.6
1.511	-1099.8									1.511	-1063.3	1.511	-1065.2	1.511	-1068.5	1.511	-1070.6	1.511	-1074.7	1.511	-1078.1	1.511	-1083.4	1.511	-1091.2	1.511	-1094.7	1.511	-1099.8
1.512	-1099.5									1.512	-1063.2	1.512	-1065.5	1.512	-1067.8	1.512	-1070.8	1.512	-1074.5	1.512	-1078.2	1.512	-1083.9	1.512	-1091	1.512	-1094.2	1.512	-1099.5
1.513	-1099.7									1.513	-1062.7	1.513	-1065.8	1.513	-1068.1	1.513	-1070.9	1.513	-1074.8	1.513	-1078.3	1.513	-1084	1.513	-1091.3	1.513	-1094.4	1.513	-1099.7
1.514	-1099.4									1.514	-1063.2	1.514	-1065.6	1.514	-1067.9	1.514	-1070.7	1.514	-1074.8	1.514	-1078.5	1.514	-1083.9	1.514	-1091.4	1.514	-1093	1.514	-1099.4
1.515	-1099.6									1.515	-1062.9	1.515	-1065.6	1.515	-1068	1.515	-1070.4	1.515	-1074.5	1.515	-1078.7	1.515	-1083.2	1.515	-1091	1.515	-1092.9	1.515	-1099.6
1.516	-1100.1									1.516	-1062.5	1.516	-1065.7	1.516	-1067.5	1.516	-1070.7	1.516	-1074.6	1.516	-1079.1	1.516	-1083.6	1.516	-1091	1.516	-1093	1.516	-1100.1
1.517	-1100.1									1.517	-1063.2	1.517	-1065.7	1.517	-1067.6	1.517	-1071	1.517	-1074.6	1.517	-1079.3	1.517	-1083.4	1.517	-1090.9	1.517	-1093	1.517	-1100.1
1.518	-1100.3									1.518	-1063	1.518	-1066.1	1.518	-1067.6	1.518	-1071.6	1.518	-1074.8	1.518	-1079.4	1.518	-1083.3	1.518	-1090.7	1.518	-1093.5	1.518	-1100.3
1.519	-1100.3									1.519	-1063.3	1.519	-1066.1	1.519	-1067.5	1.519	-1071.6	1.519	-1074.7	1.519	-1079.6	1.519	-1083.3	1.519	-1090.9	1.519	-1093.3	1.519	-1100.3
1.52	-1100.1									1.52	-1063.5	1.52	-1066.3	1.52	-1067.4	1.52	-1071.5	1.52	-1075.3	1.52	-1079.4	1.52	-1083.1	1.52	-1090.9	1.52	-1092.6	1.52	-1100.1
1.521	-1100.8									1.521	-1063.4	1.521	-1065.8	1.521	-1066.9	1.521	-1071.8	1.521	-1074.4	1.521	-1078.4	1.521	-1083.1	1.521	-1091.2	1.521	-1093.3	1.521	-1100.8
1.522	-1100.2									1.522	-1064	1.522	-1065.9	1.522	-1066.5	1.522	-1071.4	1.522	-1074.7	1.522	-1078.7	1.522	-1083.5	1.522	-1091.4	1.522	-1093	1.522	-1100.2
1.523	-1100.4									1.523	-1064.2	1.523	-1065.5	1.523	-1066.8	1.523	-1071.8	1.523	-1074	1.523	-1078.7	1.523	-1083	1.523	-1091.5	1.523	-1092.6	1.523	-1100.4
1.524	-1100.6									1.524	-1064	1.524	-1065.4	1.524	-1066.5	1.524	-1071.7	1.524	-1074.5	1.524	-1078.6	1.524	-1083.3	1.524	-1090.9	1.524	-1093	1.524	-1100.6
1.525	-1099.4									1.525	-1063.9	1.525	-1065.4	1.525	-1066.9	1.525	-1072.1	1.525	-1074.9	1.525	-1078.5	1.525	-1083	1.525	-1091	1.525	-1093.3	1.525	-1099.4
1.526	-1099.6									1.526	-1063.8	1.526	-1065.1	1.526	-1066.4	1.526	-1071.6	1.526	-1074.5	1.526	-1078.8	1.526	-1083.6	1.526	-1091.8	1.526	-1093.2	1.526	-1099.6
1.527	-1099									1.527	-1064.2	1.527	-1065.3	1.527	-1067	1.527	-1071.2	1.527	-1075.3	1.527	-1078.2	1.527	-1083.8	1.527	-1090.9	1.527	-1092.7	1.527	-1099
1.528	-1099.8									1.528	-1063.4	1.528	-1064.7	1.528	-1066.8	1.528	-1071.2	1.528	-1075	1.528	-1078.5	1.528	-1083.8	1.528	-1091.2	1.528	-1092.5	1.528	-1099.8
1.529	-1099.9									1.529	-1063.7	1.529	-1064.9	1.529	-1067.2	1.529	-1070.9	1.529	-1075.1	1.529	-1078.9	1.529	-1084	1.529	-1090.2	1.529	-1092.6	1.529	-1099.9
1.53	-1099.6									1.53	-1063.9	1.53	-1064.8	1.53	-1067.1	1.53	-1070.6	1.53	-1075.2	1.53	-1078.7	1.53	-1084	1.53	-1090.6	1.53	-1093.5	1.53	-1099.6
1.531	-1099.1									1.531	-1063.8	1.531	-1065.1	1.531	-1067.3	1.531	-1070.7	1.531	-1075.5	1.531	-1079.1	1.531	-1084.3	1.531	-1089.9	1.531	-1092.8	1.531	-1099.1
1.532	-1098.8									1.532	-1063.6	1.532	-1065	1.532	-1067.1	1.532	-1070.7	1.532	-1075.5	1.532	-1078.9	1.532	-1084.1	1.532	-1090.9	1.532	-1093.7	1.532	-1098.8
1.533	-1098.9									1.533	-1063.8	1.533	-1065.2	1.533	-1067.5	1.533	-1071	1.533	-1075.5	1.533	-1078.7	1.533	-1083.5	1.533	-1090.3	1.533	-1093.1	1.533	-1098.9
1.534	-1098.9									1.534	-1063.6	1.534	-1064.5	1.534	-1067.7	1.534	-1070.8	1.534	-1075.3	1.534	-1079	1.534	-1083.7	1.534	-1090.3	1.534	-1092.2	1.534	-1098.9
1.535	-1098.8									1.535	-1062.7	1.535	-1064.9	1.535	-1068.2	1.535	-1070.8	1.535	-1075.6	1.535	-1079.4	1.535	-1084.1	1.535	-1089.9	1.535	-1092.2	1.535	-1098.8
1.536	-1099.1									1.536	-1062.2	1.536	-1064.8	1.536	-1068.4	1.536	-1071.2	1.536	-1075.5	1.536	-1078.7	1.536	-1084.4	1.536	-1090.2	1.536	-1091.9	1.536	-1099.1
1.537	-1099									1.537	-1062.2	1.537	-1064.6	1.537	-1068.4	1.537	-1071.5	1.537	-1075.2	1.537	-1079.5	1.537	-1084.3	1.537	-1089.9	1.537	-1092.6	1.537	-1099
1.538	-1099.3									1.538	-1062.2	1.538	-1064.8	1.538	-1068	1.538	-1072.2	1.538	-1075.2	1.538	-1079.3	1.538	-1084.2	1.538	-1090.2	1.538	-1091	1.538	-1099.3
1.539	-1098.8									1.539	-1062	1.539	-1064.3	1.539	-1067.7	1.539	-1070.2	1.539	-1075.3	1.539	-1078.1	1.539	-1084.6	1.539	-1089.9	1.539	-1090.8	1.539	-1098.8
1.54	-1099.7									1.54	-1062.3	1.54	-1064.5	1.54	-1067	1.54	-1069.7	1.54	-1075.3	1.54	-1078.8	1.54	-1084.4	1.54	-1089.9	1.54	-1091.3	1.54	-1099.7
1.541	-1099.3									1.541	-1062.3	1.541	-1064.1	1.541	-1067.4	1.541	-1069.7	1.541	-1075.6	1.541	-1078.6	1.541	-1084.2	1.541	-1089.8	1.541	-1091.4	1.541	-1099.3
1.542	-1099									1.542	-1062	1.542	-1064.3	1.542	-1068.2	1.542	-1070	1.542	-1075.8	1.542	-1078.6	1.542	-1083.7	1.542	-1090.3	1.542	-1091.5	1.542	-1099
1.543	-1098.6									1.543	-1062.1	1.543	-1064	1.543	-1067.7	1.543	-1069.9	1.543	-1076.4	1.543	-1078.9	1.543	-1084	1.543	-1089.8	1.543	-1091.3	1.543	-1098.6
1.544	-1098.2									1.544	-1062	1.544	-1063.9	1.544	-1068	1.544	-1069.9	1.544	-1076.7	1.544	-1078	1.544	-1084.3	1.544	-1089.4	1.544	-1092.2	1.544	-1098.2
1.545	-1098.7									1.545	-1061.6	1.545	-1064.1	1.545	-1067.7	1.545	-1070.1	1.545	-1076.8	1.545	-1079.3	1.545	-1083.8	1.545	-1089.4	1.545	-1092.1	1.545	-1098.7
1.546	-1098.4									1.546	-1062	1.546	-1064	1.546	-1067.8	1.546	-1069.7	1.546	-1076.9	1.546	-1079	1.546	-1084	1.546	-1088.8	1.546	-1092	1.546	-1098.4
1.547	-1098.5									1.547	-1061.7	1.547	-1063.8	1.547	-1068.5	1.547	-1069.7	1.547	-1077.1	1.547	-1079.5	1.547	-1084.3	1.547	-1089.5	1.547	-1091.7	1.547	-1098.5
1.548	-1097.2									1.548	-1061.9	1.548	-1063.8	1.548	-1068.1	1.548	-1070.2	1.548	-1076.9	1.548	-1079	1.548	-1084.1	1.548	-1089.4	1.548	-1092.1	1.548	-1097.2
1.549	-1097.4									1.549	-1061.7	1.549	-1063.4	1.549	-1068.7	1.549	-1069.7	1.549	-1077	1.549	-1079.4	1.549	-1084	1.549	-1089.2	1.549	-1091.1	1.549	-1097.4
1.55	-1097.8									1.55	-1061.1	1.55	-1063.6	1.55	-1069.1	1.55	-1069.6	1.55	-1078.3	1.55	-1079.7	1.55	-1084.7	1.55	-1089.5	1.55	-1091.7	1.55	-1097.8
1.551	-1098.2									1.551	-1061.5	1.551	-1063.6	1.551	-1068.5	1.551	-1070.1	1.551	-1077.6	1.551	-1079.5	1.551	-1084.6	1.551	-1089.1	1.551	-1091.5	1.551	-1098.2
1.552	-1097.5									1.552	-1061.5	1.552	-1063.6	1.552	-1068.6	1.552	-1070.3	1.552	-1077.9	1.552	-1079.2	1.552	-1084.6	1.552	-1088.9	1.552	-1091.5	1.552	-1097.5
1.553	-1098.2									1.553	-1061.9	1.553	-1063.1	1.553	-1068	1.553	-1070.5	1.553	-1077.9	1.553	-1079.9	1.553	-1084.4	1.553	-1089.4	1.553	-1091.5	1.553	-1098.2
1.554	-1097.3									1.554	-1062	1.554	-1062.7	1.554	-1068.7	1.554	-1071.1	1.554	-1077.7	1.554	-1079.2	1.554	-1085	1.554	-1088.8	1.554	-1091.4	1.554	-1097.3
1.555	-1098									1.555	-1062.3	1.555	-1063.2	1.555	-1068.6	1.555	-1070.6	1.555	-1077.6	1.555	-1079.3	1.555	-1084.7	1.555	-1088.7	1.555	-1091	1.555	-1098
1.556	-1097.4									1.556	-1061.1	1.556	-1062.8	1.556	-1068.3	1.556	-1071.2	1.556	-1077.4	1.556	-1079.6	1.556	-1085.2	1.556	-1088.7	1.556	-1091.4	1.556	-1097.4
1.557	-1097.8									1.557	-1061.1	1.557	-1063	1.557	-1068.6	1.557	-1071	1.557	-1077.1	1.557	-1079.7	1.557	-1084.9	1.557	-1088.5	1.557	-1091.4	1.557	-1097.8
1.558	-1098.4									1.558	-1061.1	1.558	-1063.2	1.558	-1068.1	1.558	-1070.4	1.558	-1077	1.558	-1079.5	1.558	-1084.9	1.558	-1088.6	1.558	-1091.9	1.558	-1098.4
1.559	-1098									1.559	-1061.2	1.559	-1063.1	1.559	-1068.2	1.559	-1070.2	1.559	-1077.1	1.559	-1079.1	1.559	-1085.1	1.559	-1089	1.559	-1091.9	1.559	-1098
1.56	-1098.1									1.56	-1060.8	1.56	-1063.6	1.56	-1068	1.56	-1070.9	1.56	-1077.8	1.56	-1079.4	1.56	-1085.1	1.56	-1089.2	1.56	-1092.3	1.56	-1098.1
1.561	-1098									1.561	-1060.4	1.561	-1063.3	1.561	-1068	1.561	-1070.8	1.561	-1077.2	1.561	-1079.9	1.561	-1084.6	1.561	-1088.8	1.561	-1092.5	1.561	-1098
1.562	-1098.4									1.562	-1060.6	1.562	-1063.2	1.562	-1068.1	1.562	-1070.7	1.562	-1076.8	1.562	-1079.3	1.562	-1085.2	1.562	-1089.3	1.562	-1091.7	1.562	-1098.4
1.563	-1097.6									1.563	-1060.2	1.563	-1063.5	1.563	-1068.1	1.563	-1070.8	1.563	-1076.8	1.563	-1079.3	1.563	-1085	1.563	-1089.3	1.563	-1092	1.563	-1097.6
1.564	-1098.3									1.564	-1060.4	1.564	-1063.5	1.564	-1068	1.564	-1070.7	1.564	-1076.6	1.564	-1079.3	1.564	-1084.5	1.564	-1088.3	1.564	-1092.3	1.564	-1098.3
1.565	-1097.7									1.565	-1060.6	1.565	-1063.7	1.565	-1067.5	1.565	-1070.2	1.565	-1075.4	1.565	-1079.4	1.565	-1084.7	1.565	-1088.9	1.565	-1091.9	1.565	-1097.7
1.566	-1097.6									1.566	-1061.1	1.566	-1063.2	1.566	-1067.6	1.566	-1070.7	1.566	-1076.4	1.566	-1080.3	1.566	-1085	1.566	-1088.8	1.566	-1092.3	1.566	-1097.6
1.567	-1097.2									1.567	-1060.4	1.567	-1063.3	1.567	-1067.5	1.567	-1070.7	1.567	-1075.1	1.567	-1080.4	1.567	-1085.2	1.567	-1088.7	1.567	-1092.1	1.567	-1097.2
1.568	-1097.4									1.568	-1061.3	1.568	-1063.1	1.568	-1067.4	1.568	-1070.6	1.568	-1075.5	1.568	-1080.5	1.568	-1085.3	1.568	-1088.7	1.568	-1092.3	1.568	-1097.4
1.569	-1097.2									1.569	-1061.5	1.569	-1062.9	1.569	-1067.8	1.569	-1070.9	1.569	-1074.3	1.569	-1080.3	1.569	-1086.1	1.569	-1089.1	1.569	-1092	1.569	-1097.2
1.57	-1097.1									1.57	-1061.7	1.57	-1062.8	1.57	-1067.4	1.57	-1070.8	1.57	-1075.1	1.57	-1080.6	1.57	-1085.3	1.57	-1088.4	1.57	-1092.1	1.57	-1097.1
1.571	-1097.4									1.571	-1061.3	1.571	-1062.6	1.571	-1067.2	1.571	-1071.4	1.571	-1074.6	1.571	-1081.3	1.571	-1085	1.571	-1089	1.571	-1091.5	1.571	-1097.4
1.572	-1097.2									1.572	-1061.8	1.572	-1062.8	1.572	-1067.2	1.572	-1070.3	1.572	-1075.4	1.572	-1081.5	1.572	-1085	1.572	-1089.2	1.572	-1091.7	1.572	-1097.2
1.573	-1097.2									1.573	-1061.7	1.573	-1062.5	1.573	-1067.1	1.573	-1069.7	1.573	-1075	1.573	-1080.7	1.573	-1085.1	1.573	-1088.5	1.573	-1091.6	1.573	-1097.2
1.574	-1097.9									1.574	-1061.7	1.574	-1062.8	1.574	-1066.8	1.574	-1070.2	1.574	-1075.5	1.574	-1081.1	1.574	-1085	1.574	-1088.3	1.574	-1092.1	1.574	-1097.9
1.575	-1097.1									1.575	-1061.6	1.575	-1063.1	1.575	-1066.4	1.575	-1070	1.575	-1075.2	1.575	-1081.4	1.575	-1084.9	1.575	-1088.4	1.575	-1092	1.575	-1097.1
1.576	-1097.7									1.576	-1062.2	1.576	-1062.7	1.576	-1066.7	1.576	-1069.4	1.576	-1075.8	1.576	-1081.6	1.576	-1084.9	1.576	-1088.6	1.576	-1091.7	1.576	-1097.7
1.577	-1097.6									1.577	-1062	1.577	-1062.4	1.577	-1066	1.577	-1069.7	1.577	-1075.3	1.577	-1081.9	1.577	-1084.7	1.577	-1088.8	1.577	-1092.2	1.577	-1097.6
1.578	-1097.5									1.578	-1062.4	1.578	-1063.3	1.578	-1066.3	1.578	-1069.5	1.578	-1075.8	1.578	-1082.5	1.578	-1085.2	1.578	-1089.4	1.578	-1091.9	1.578	-1097.5
1.579	-1097.3									1.579	-1062.2	1.579	-1062.6	1.579	-1066.1	1.579	-1070.2	1.579	-1075.5	1.579	-1081.7	1.579	-1085.1	1.579	-1089.3	1.579	-1091.7	1.579	-1097.3
1.58	-1097.4									1.58	-1061.6	1.58	-1063.1	1.58	-1066.5	1.58	-1069.1	1.58	-1076	1.58	-1082.1	1.58	-1085.7	1.58	-1088.8	1.58	-1092.5	1.58	-1097.4
1.581	-1097.9									1.581	-1061	1.581	-1062.7	1.581	-1066.5	1.581	-1069.9	1.581	-1075.2	1.581	-1081.6	1.581	-1084.6	1.581	-1089.2	1.581	-1092.3	1.581	-1097.9
1.582	-1097.9									1.582	-1061.9	1.582	-1063.3	1.582	-1067.4	1.582	-1069.1	1.582	-1075.1	1.582	-1081.9	1.582	-1085.3	1.582	-1088.9	1.582	-1092.1	1.582	-1097.9
1.583	-1097.3									1.583	-1061.5	1.583	-1062.2	1.583	-1067	1.583	-1069.4	1.583	-1075	1.583	-1081.9	1.583	-1085	1.583	-1088.9	1.583	-1091.7	1.583	-1097.3
1.584	-1098.5									1.584	-1061.7	1.584	-1063.3	1.584	-1067	1.584	-1069.2	1.584	-1074.8	1.584	-1082.2	1.584	-1085.4	1.584	-1089.1	1.584	-1092	1.584	-1098.5
1.585	-1098.5									1.585	-1062.4	1.585	-1062.8	1.585	-1067.2	1.585	-1069.7	1.585	-1075.5	1.585	-1082.3	1.585	-1085.6	1.585	-1089.3	1.585	-1092.3	1.585	-1098.5
1.586	-1098.6									1.586	-1061.8	1.586	-1062.9	1.586	-1067.2	1.586	-1069.5	1.586	-1074.5	1.586	-1081.8	1.586	-1085.4	1.586	-1089.1	1.586	-1091.4	1.586	-1098.6
1.587	-1097.6									1.587	-1061.8	1.587	-1062.8	1.587	-1067.1	1.587	-1070	1.587	-1074.6	1.587	-1081.6	1.587	-1085.6	1.587	-1089.1	1.587	-1092	1.587	-1097.6
1.588	-1097.1									1.588	-1062.3	1.588	-1063.8	1.588	-1067.5	1.588	-1070.1	1.588	-1075.2	1.588	-1081.4	1.588	-1086	1.588	-1089.3	1.588	-1092.2	1.588	-1097.1
1.589	-1097									1.589	-1062.8	1.589	-1063.3	1.589	-1067.7	1.589	-1070.7	1.589	-1075	1.589	-1081.9	1.589	-1085.7	1.589	-1089.5	1.589	-1092.1	1.589	-1097
1.59	-1097.2									1.59	-1063.5	1.59	-1063.3	1.59	-1068.1	1.59	-1071.4	1.59	-1075.3	1.59	-1081.1	1.59	-1086	1.59	-1089.5	1.59	-1091.6	1.59	-1097.2
1.591	-1096.9									1.591	-1063.8	1.591	-1063.3	1.591	-1068.6	1.591	-1070.7	1.591	-1074.4	1.591	-1081.4	1.591	-1085.6	1.591	-1089.5	1.591	-1091.6	1.591	-1096.9
1.592	-1096.8									1.592	-1063.8	1.592	-1063.9	1.592	-1068.8	1.592	-1071.2	1.592	-1074.9	1.592	-1080.9	1.592	-1086	1.592	-1089.3	1.592	-1091.3	1.592	-1096.8
1.593	-1096.1									1.593	-1063.8	1.593	-1063.7	1.593	-1066.6	1.593	-1071.3	1.593	-1075.4	1.593	-1080.1	1.593	-1085.9	1.593	-1090	1.593	-1091.9	1.593	-1096.1
1.594	-1095.8									1.594	-1063.8	1.594	-1064.4	1.594	-1066.9	1.594	-1071.3	1.594	-1074.5	1.594	-1079.1	1.594	-1086.1	1.594	-1090.3	1.594	-1091.4	1.594	-1095.8
1.595	-1096									1.595	-1063.4	1.595	-1064.8	1.595	-1066.6	1.595	-1070.7	1.595	-1074.8	1.595	-1080.1	1.595	-1086.1	1.595	-1090.1	1.595	-1092.2	1.595	-1096
1.596	-1096.2									1.596	-1063.8	1.596	-1064.4	1.596	-1066.8	1.596	-1071	1.596	-1074.7	1.596	-1080	1.596	-1086.3	1.596	-1090.4	1.596	-1092.2	1.596	-1096.2
1.597	-1095.9									1.597	-1062.4	1.597	-1063.7	1.597	-1067	1.597	-1070.6	1.597	-1074.5	1.597	-1079.5	1.597	-1086.2	1.597	-1090.8	1.597	-1092	1.597	-1095.9
1.598	-1095.7									1.598	-1063.3	1.598	-1063.7	1.598	-1067.3	1.598	-1069.9	1.598	-1074.4	1.598	-1079.6	1.598	-1086.3	1.598	-1091.3	1.598	-1091.8	1.598	-1095.7
1.599	-1096									1.599	-1062.7	1.599	-1063.5	1.599	-1067.5	1.599	-1070.4	1.599	-1074.5	1.599	-1080.4	1.599	-1086.1	1.599	-1091.4	1.599	-1091.5	1.599	-1096
1.6	-1095.5									1.6	-1063	1.6	-1063.9	1.6	-1067.6	1.6	-1070.6	1.6	-1075.1	1.6	-1079.3	1.6	-1086.3	1.6	-1091.7	1.6	-1091.6	1.6	-1095.5
1.601	-1096.2									1.601	-1062.9	1.601	-1064.8	1.601	-1067.7	1.601	-1070.7	1.601	-1075.7	1.601	-1079.8	1.601	-1086.8	1.601	-1091.6	1.601	-1090.9	1.601	-1096.2
1.602	-1095.8									1.602	-1062.8	1.602	-1064.7	1.602	-1067.7	1.602	-1070.2	1.602	-1075.9	1.602	-1079.8	1.602	-1085.9	1.602	-1091.4	1.602	-1091	1.602	-1095.8
1.603	-1096.2									1.603	-1062.5	1.603	-1065.2	1.603	-1068	1.603	-1070.4	1.603	-1075.6	1.603	-1080.4	1.603	-1086	1.603	-1091.9	1.603	-1090.9	1.603	-1096.2
1.604	-1095.5									1.604	-1062.5	1.604	-1065.9	1.604	-1068.4	1.604	-1071.2	1.604	-1075.5	1.604	-1079.7	1.604	-1085.6	1.604	-1091.6	1.604	-1091	1.604	-1095.5
1.605	-1095.5									1.605	-1062.2	1.605	-1066	1.605	-1068.3	1.605	-1070.9	1.605	-1076.1	1.605	-1079.7	1.605	-1085.4	1.605	-1092.2	1.605	-1091	1.605	-1095.5
1.606	-1095.5									1.606	-1061.8	1.606	-1065.6	1.606	-1069	1.606	-1069	1.606	-1075.5	1.606	-1080.1	1.606	-1085.3	1.606	-1091.7	1.606	-1091	1.606	-1095.5
1.607	-1095.8									1.607	-1061.7	1.607	-1063.5	1.607	-1068.9	1.607	-1070	1.607	-1075.6	1.607	-1079.8	1.607	-1084.9	1.607	-1091.4	1.607	-1091.2	1.607	-1095.8
1.608	-1095.2									1.608	-1061.8	1.608	-1064	1.608	-1068.8	1.608	-1069.6	1.608	-1075.4	1.608	-1079.5	1.608	-1085.2	1.608	-1091.3	1.608	-1090.9	1.608	-1095.2
1.609	-1095.6									1.609	-1062.2	1.609	-1064.5	1.609	-1068.8	1.609	-1068.8	1.609	-1076	1.609	-1079.8	1.609	-1085	1.609	-1091.4	1.609	-1091	1.609	-1095.6
1.61	-1096.4									1.61	-1061.6	1.61	-1064.5	1.61	-1068.8	1.61	-1069.6	1.61	-1075.3	1.61	-1079.7	1.61	-1085	1.61	-1091.5	1.61	-1090.8	1.61	-1096.4
1.611	-1096.4									1.611	-1061.4	1.611	-1064.5	1.611	-1068.6	1.611	-1069.5	1.611	-1075.2	1.611	-1080.2	1.611	-1085.2	1.611	-1091.1	1.611	-1090.6	1.611	-1096.4
1.612	-1096.3									1.612	-1062.2	1.612	-1065.1	1.612	-1069	1.612	-1070.6	1.612	-1075.2	1.612	-1079.3	1.612	-1085.3	1.612	-1091.3	1.612	-1090.4	1.612	-1096.3
1.613	-1097.1									1.613	-1061.6	1.613	-1065.3	1.613	-1069.2	1.613	-1070.3	1.613	-1075	1.613	-1079.6	1.613	-1085.2	1.613	-1090.6	1.613	-1090.7	1.613	-1097.1
1.614	-1096.4									1.614	-1062.4	1.614	-1065.8	1.614	-1069.1	1.614	-1070.8	1.614	-1075.1	1.614	-1079.1	1.614	-1084.6	1.614	-1087.7	1.614	-1090.3	1.614	-1096.4
1.615	-1094.4									1.615	-1062.7	1.615	-1064.9	1.615	-1069.2	1.615	-1070.5	1.615	-1075	1.615	-1079	1.615	-1084.6	1.615	-1088.4	1.615	-1090.3	1.615	-1094.4
1.616	-1095.4									1.616	-1063	1.616	-1064.7	1.616	-1069.2	1.616	-1069.5	1.616	-1075.2	1.616	-1079.1	1.616	-1084.4	1.616	-1088.3	1.616	-1090.5	1.616	-1095.4
1.617	-1095.5									1.617	-1063.3	1.617	-1064.9	1.617	-1069.1	1.617	-1070.2	1.617	-1075	1.617	-1079	1.617	-1084.7	1.617	-1088.3	1.617	-1090.2	1.617	-1095.5
1.618	-1095.6									1.618	-1062	1.618	-1065.6	1.618	-1068.9	1.618	-1070.3	1.618	-1075	1.618	-1078.7	1.618	-1084.5	1.618	-1089.1	1.618	-1090.3	1.618	-1095.6
1.619	-1095.1									1.619	-1062.4	1.619	-1064.9	1.619	-1069.1	1.619	-1070.2	1.619	-1075.2	1.619	-1078.6	1.619	-1084.3	1.619	-1088.3	1.619	-1090.4	1.619	-1095.1
1.62	-1095.1									1.62	-1062.2	1.62	-1064.9	1.62	-1068.7	1.62	-1070.3	1.62	-1075.4	1.62	-1078.8	1.62	-1084.7	1.62	-1088.4	1.62	-1090.2	1.62	-1095.1
1.621	-1094.7									1.621	-1062.3	1.621	-1064.9	1.621	-1069.3	1.621	-1070.2	1.621	-1075.8	1.621	-1079.3	1.621	-1084.2	1.621	-1088.2	1.621	-1091	1.621	-1094.7
1.622	-1095									1.622	-1062.5	1.622	-1065.4	1.622	-1069.4	1.622	-1070.4	1.622	-1076.6	1.622	-1079.2	1.622	-1084.4	1.622	-1088.2	1.622	-1091	1.622	-1095
1.623	-1095.2									1.623	-1062.3	1.623	-1065.2	1.623	-1069.4	1.623	-1070.4	1.623	-1076.8	1.623	-1078.7	1.623	-1084.9	1.623	-1088.1	1.623	-1091.2	1.623	-1095.2
1.624	-1095.8									1.624	-1062.7	1.624	-1065.7	1.624	-1068.9	1.624	-1070.2	1.624	-1077.8	1.624	-1079.2	1.624	-1084.6	1.624	-1088	1.624	-1090.7	1.624	-1095.8
1.625	-1096									1.625	-1061.9	1.625	-1065.9	1.625	-1069.6	1.625	-1070.4	1.625	-1077.4	1.625	-1079	1.625	-1084.5	1.625	-1088.1	1.625	-1091.6	1.625	-1096
1.626	-1095.5									1.626	-1062.5	1.626	-1066.2	1.626	-1069.2	1.626	-1070.4	1.626	-1074.6	1.626	-1079	1.626	-1084.5	1.626	-1088.8	1.626	-1091.3	1.626	-1095.5
1.627	-1095.5									1.627	-1062.2	1.627	-1065.9	1.627	-1069.1	1.627	-1070.5	1.627	-1073.9	1.627	-1078.8	1.627	-1084.5	1.627	-1088.8	1.627	-1092.1	1.627	-1095.5
1.628	-1095.8									1.628	-1062.2	1.628	-1066.1	1.628	-1069.4	1.628	-1070.5	1.628	-1074.5	1.628	-1078.9	1.628	-1084.2	1.628	-1089.3	1.628	-1091.6	1.628	-1095.8
1.629	-1095.9									1.629	-1061.5	1.629	-1065.9	1.629	-1069.4	1.629	-1070.7	1.629	-1073.6	1.629	-1079.3	1.629	-1084.6	1.629	-1089.9	1.629	-1091.5	1.629	-1095.9
1.63	-1095.8									1.63	-1062.5	1.63	-1066.4	1.63	-1069.1	1.63	-1070.7	1.63	-1074.5	1.63	-1078.9	1.63	-1084.7	1.63	-1089.9	1.63	-1091.4	1.63	-1095.8
1.631	-1096									1.631	-1062.4	1.631	-1066.5	1.631	-1069.2	1.631	-1071.4	1.631	-1073.9	1.631	-1079.1	1.631	-1085.4	1.631	-1088.7	1.631	-1091.5	1.631	-1096
1.632	-1096.3									1.632	-1062.2	1.632	-1066.5	1.632	-1069.8	1.632	-1071.3	1.632	-1073.7	1.632	-1079	1.632	-1085.1	1.632	-1089.2	1.632	-1092.2	1.632	-1096.3
1.633	-1096.1									1.633	-1061.7	1.633	-1066	1.633	-1069.5	1.633	-1071.3	1.633	-1073.4	1.633	-1079.3	1.633	-1085	1.633	-1088.7	1.633	-1091.2	1.633	-1096.1
1.634	-1096.8									1.634	-1062	1.634	-1066.3	1.634	-1070.7	1.634	-1070.3	1.634	-1073.7	1.634	-1079	1.634	-1084.9	1.634	-1089.6	1.634	-1091.6	1.634	-1096.8
1.635	-1096.6									1.635	-1061.9	1.635	-1065.1	1.635	-1069.7	1.635	-1070.3	1.635	-1074.8	1.635	-1079.5	1.635	-1084.8	1.635	-1089	1.635	-1091.6	1.635	-1096.6
1.636	-1096.4									1.636	-1061.1	1.636	-1065.4	1.636	-1069.9	1.636	-1070.4	1.636	-1074.9	1.636	-1079.5	1.636	-1085.3	1.636	-1089.7	1.636	-1092.1	1.636	-1096.4
1.637	-1095.9									1.637	-1061.4	1.637	-1065.5	1.637	-1069.8	1.637	-1071	1.637	-1075.5	1.637	-1080.2	1.637	-1085.5	1.637	-1090.1	1.637	-1092	1.637	-1095.9
1.638	-1095.8									1.638	-1061.5	1.638	-1065	1.638	-1069.5	1.638	-1072	1.638	-1075.9	1.638	-1080	1.638	-1085	1.638	-1090.2	1.638	-1091.7	1.638	-1095.8
1.639	-1095.6									1.639	-1061.1	1.639	-1065.2	1.639	-1069.5	1.639	-1071.6	1.639	-1075.7	1.639	-1080.3	1.639	-1084.9	1.639	-1088.4	1.639	-1092.1	1.639	-1095.6
1.64	-1095									1.64	-1061.7	1.64	-1065.3	1.64	-1070.1	1.64	-1071.7	1.64	-1075.6	1.64	-1079.4	1.64	-1084.5	1.64	-1088.9	1.64	-1092.3	1.64	-1095
1.641	-1094.7									1.641	-1061.2	1.641	-1065.6	1.641	-1069.2	1.641	-1071.5	1.641	-1076.3	1.641	-1079.9	1.641	-1084.3	1.641	-1089	1.641	-1092.9	1.641	-1094.7
1.642	-1095.7									1.642	-1061.5	1.642	-1065.6	1.642	-1069.8	1.642	-1071.6	1.642	-1073.9	1.642	-1079.8	1.642	-1084.3	1.642	-1089.3	1.642	-1092.6	1.642	-1095.7
1.643	-1095.6									1.643	-1061.5	1.643	-1065.7	1.643	-1069.2	1.643	-1071.5	1.643	-1073.5	1.643	-1079.8	1.643	-1084.4	1.643	-1089.4	1.643	-1092	1.643	-1095.6
1.644	-1095.1									1.644	-1061.9	1.644	-1065.1	1.644	-1069.8	1.644	-1072	1.644	-1073.9	1.644	-1079.2	1.644	-1084.9	1.644	-1088.8	1.644	-1092	1.644	-1095.1
1.645	-1094.9									1.645	-1061.7	1.645	-1065.4	1.645	-1069.3	1.645	-1071.5	1.645	-1073.6	1.645	-1079	1.645	-1084.7	1.645	-1088.5	1.645	-1091.9	1.645	-1094.9
1.646	-1095									1.646	-1062.2	1.646	-1065.4	1.646	-1069.6	1.646	-1071.8	1.646	-1074.2	1.646	-1078.6	1.646	-1085.1	1.646	-1088.4	1.646	-1091.5	1.646	-1095
1.647	-1095									1.647	-1062	1.647	-1065.4	1.647	-1069.2	1.647	-1072	1.647	-1074.3	1.647	-1079.1	1.647	-1084.4	1.647	-1088.2	1.647	-1091.7	1.647	-1095
1.648	-1095.4									1.648	-1062.1	1.648	-1065.2	1.648	-1069.7	1.648	-1072.3	1.648	-1074.5	1.648	-1078.6	1.648	-1085.2	1.648	-1088.6	1.648	-1092.5	1.648	-1095.4
1.649	-1095.1									1.649	-1062.7	1.649	-1065.5	1.649	-1069.3	1.649	-1071.9	1.649	-1074.8	1.649	-1079.1	1.649	-1084.6	1.649	-1088.1	1.649	-1091.4	1.649	-1095.1
1.65	-1095.5									1.65	-1062.7	1.65	-1065	1.65	-1070.1	1.65	-1072.6	1.65	-1075.7	1.65	-1079.2	1.65	-1085.3	1.65	-1088	1.65	-1091.6	1.65	-1095.5
1.651	-1095.7									1.651	-1062.8	1.651	-1065.4	1.651	-1070.1	1.651	-1072.8	1.651	-1074.8	1.651	-1079.5	1.651	-1085	1.651	-1087.4	1.651	-1091	1.651	-1095.7
1.652	-1096									1.652	-1062.7	1.652	-1064.9	1.652	-1070.3	1.652	-1072.7	1.652	-1074.5	1.652	-1079.5	1.652	-1085.3	1.652	-1087.6	1.652	-1091.4	1.652	-1096
1.653	-1095.3									1.653	-1063.2	1.653	-1064.6	1.653	-1069.2	1.653	-1073.1	1.653	-1075.1	1.653	-1079.6	1.653	-1085.4	1.653	-1087.8	1.653	-1091.3	1.653	-1095.3
1.654	-1095.5									1.654	-1063.1	1.654	-1064.8	1.654	-1069.6	1.654	-1073.5	1.654	-1074.7	1.654	-1079.3	1.654	-1085.8	1.654	-1087.7	1.654	-1091.8	1.654	-1095.5
1.655	-1095.1									1.655	-1062.7	1.655	-1065.1	1.655	-1069.5	1.655	-1072.9	1.655	-1074.7	1.655	-1079.5	1.655	-1085.5	1.655	-1087.7	1.655	-1092.3	1.655	-1095.1
1.656	-1096.1									1.656	-1062.4	1.656	-1064.9	1.656	-1069.6	1.656	-1073.1	1.656	-1074.6	1.656	-1079.6	1.656	-1084.9	1.656	-1087.4	1.656	-1092.3	1.656	-1096.1
1.657	-1095.2									1.657	-1062.9	1.657	-1065.2	1.657	-1069.1	1.657	-1072.9	1.657	-1074.4	1.657	-1079.8	1.657	-1084.6	1.657	-1087.8	1.657	-1092.3	1.657	-1095.2
1.658	-1095.4									1.658	-1061.9	1.658	-1064.7	1.658	-1069.2	1.658	-1072.5	1.658	-1074.2	1.658	-1079.6	1.658	-1085.3	1.658	-1088.3	1.658	-1093	1.658	-1095.4
1.659	-1095.4									1.659	-1062	1.659	-1064.9	1.659	-1068.9	1.659	-1072.6	1.659	-1074.3	1.659	-1079.9	1.659	-1084.8	1.659	-1088.1	1.659	-1093.2	1.659	-1095.4
1.66	-1096.2									1.66	-1061.8	1.66	-1065	1.66	-1069.3	1.66	-1072.5	1.66	-1074.8	1.66	-1080	1.66	-1085.2	1.66	-1088.2	1.66	-1093.8	1.66	-1096.2
1.661	-1095.5									1.661	-1061.9	1.661	-1064.6	1.661	-1069.2	1.661	-1072.2	1.661	-1074.4	1.661	-1079.9	1.661	-1085.6	1.661	-1088.3	1.661	-1093.4	1.661	-1095.5
1.662	-1095.9									1.662	-1061.9	1.662	-1064.4	1.662	-1069.6	1.662	-1072.8	1.662	-1074.7	1.662	-1079.9	1.662	-1085.7	1.662	-1088.2	1.662	-1093.4	1.662	-1095.9
1.663	-1096.3									1.663	-1061.6	1.663	-1064.1	1.663	-1069.7	1.663	-1072.4	1.663	-1074.5	1.663	-1080	1.663	-1084.7	1.663	-1088.3	1.663	-1092.5	1.663	-1096.3
1.664	-1096.1									1.664	-1061.6	1.664	-1064.3	1.664	-1070	1.664	-1072.8	1.664	-1074.4	1.664	-1080	1.664	-1085.3	1.664	-1088.2	1.664	-1092.1	1.664	-1096.1
1.665	-1096.3									1.665	-1060.8	1.665	-1064.4	1.665	-1069.6	1.665	-1072.6	1.665	-1074.2	1.665	-1080	1.665	-1085.2	1.665	-1088	1.665	-1092.7	1.665	-1096.3
1.666	-1095.7									1.666	-1061.5	1.666	-1064	1.666	-1069.6	1.666	-1073.3	1.666	-1074.2	1.666	-1079.6	1.666	-1085.5	1.666	-1088.2	1.666	-1092.6	1.666	-1095.7
1.667	-1096.2									1.667	-1061.3	1.667	-1064.3	1.667	-1069.6	1.667	-1073.4	1.667	-1073.9	1.667	-1080	1.667	-1084.6	1.667	-1088.3	1.667	-1092	1.667	-1096.2
1.668	-1096.2									1.668	-1061.4	1.668	-1064.6	1.668	-1069.3	1.668	-1072.3	1.668	-1074	1.668	-1079.3	1.668	-1084.2	1.668	-1088.5	1.668	-1092.6	1.668	-1096.2
1.669	-1095.5									1.669	-1061.6	1.669	-1063.5	1.669	-1069.3	1.669	-1072	1.669	-1073.7	1.669	-1079.6	1.669	-1083.7	1.669	-1088.6	1.669	-1092.5	1.669	-1095.5
1.67	-1096.3									1.67	-1061.6	1.67	-1064.2	1.67	-1069.8	1.67	-1073.2	1.67	-1074.7	1.67	-1079.4	1.67	-1084.3	1.67	-1088.8	1.67	-1092.5	1.67	-1096.3
1.671	-1096.5									1.671	-1061.4	1.671	-1064.1	1.671	-1069.4	1.671	-1073.6	1.671	-1074.2	1.671	-1080.3	1.671	-1084	1.671	-1088.8	1.671	-1092.5	1.671	-1096.5
1.672	-1096.6									1.672	-1061.5	1.672	-1064.8	1.672	-1069.9	1.672	-1073.3	1.672	-1074.7	1.672	-1079.6	1.672	-1083.9	1.672	-1089.4	1.672	-1092.6	1.672	-1096.6
1.673	-1096.7									1.673	-1061.9	1.673	-1064.5	1.673	-1069.8	1.673	-1073.1	1.673	-1075.1	1.673	-1079.8	1.673	-1083.3	1.673	-1089.2	1.673	-1092.7	1.673	-1096.7
1.674	-1096.6									1.674	-1063.2	1.674	-1065.3	1.674	-1070.1	1.674	-1073.2	1.674	-1075.2	1.674	-1080.3	1.674	-1083.6	1.674	-1089.6	1.674	-1092.5	1.674	-1096.6
1.675	-1095.8									1.675	-1062.8	1.675	-1065.7	1.675	-1069.6	1.675	-1073.2	1.675	-1075.3	1.675	-1080.2	1.675	-1083.7	1.675	-1089.6	1.675	-1092.6	1.675	-1095.8
1.676	-1096									1.676	-1062.7	1.676	-1065.2	1.676	-1069.8	1.676	-1073.3	1.676	-1075.1	1.676	-1079.8	1.676	-1083.7	1.676	-1089.6	1.676	-1092.6	1.676	-1096
1.677	-1096.2									1.677	-1062.7	1.677	-1064.4	1.677	-1069.1	1.677	-1072.9	1.677	-1075.5	1.677	-1080.1	1.677	-1083.5	1.677	-1088.9	1.677	-1092.4	1.677	-1096.2
1.678	-1096.2									1.678	-1062.4	1.678	-1065.4	1.678	-1068.9	1.678	-1073.3	1.678	-1075.9	1.678	-1079.6	1.678	-1083.5	1.678	-1089.6	1.678	-1093	1.678	-1096.2
1.679	-1096									1.679	-1062.5	1.679	-1065.9	1.679	-1069.1	1.679	-1073.3	1.679	-1074.9	1.679	-1079.9	1.679	-1083.9	1.679	-1089.4	1.679	-1092.7	1.679	-1096
1.68	-1096.4									1.68	-1062.7	1.68	-1063.8	1.68	-1069	1.68	-1073.1	1.68	-1075.1	1.68	-1079.8	1.68	-1083.8	1.68	-1089.8	1.68	-1092.7	1.68	-1096.4
1.681	-1096.4									1.681	-1062.6	1.681	-1063.8	1.681	-1068.9	1.681	-1072.5	1.681	-1075.4	1.681	-1079.4	1.681	-1084	1.681	-1089.2	1.681	-1092.9	1.681	-1096.4
1.682	-1096									1.682	-1062.7	1.682	-1064.3	1.682	-1069	1.682	-1072.9	1.682	-1075.4	1.682	-1079.3	1.682	-1084.8	1.682	-1090	1.682	-1093.1	1.682	-1096
1.683	-1096.9									1.683	-1062.7	1.683	-1064.2	1.683	-1068.7	1.683	-1073.4	1.683	-1075.5	1.683	-1079.3	1.683	-1084	1.683	-1089.8	1.683	-1092.6	1.683	-1096.9
1.684	-1096.8									1.684	-1062.5	1.684	-1064.3	1.684	-1069.2	1.684	-1072.7	1.684	-1075.6	1.684	-1079.2	1.684	-1084	1.684	-1090.1	1.684	-1093.1	1.684	-1096.8
1.685	-1096.3									1.685	-1063.1	1.685	-1065.2	1.685	-1069.1	1.685	-1072.7	1.685	-1075.9	1.685	-1079.6	1.685	-1084.3	1.685	-1090.2	1.685	-1092.7	1.685	-1096.3
1.686	-1097.1									1.686	-1063.2	1.686	-1065.2	1.686	-1069.1	1.686	-1073	1.686	-1075.8	1.686	-1079	1.686	-1084.5	1.686	-1090.1	1.686	-1092.2	1.686	-1097.1
1.687	-1096.8									1.687	-1062.7	1.687	-1065.8	1.687	-1068.2	1.687	-1073.2	1.687	-1075.9	1.687	-1079.1	1.687	-1084.2	1.687	-1090.1	1.687	-1092.5	1.687	-1096.8
1.688	-1097.1									1.688	-1063.3	1.688	-1065.9	1.688	-1068.4	1.688	-1073.3	1.688	-1075.4	1.688	-1078.7	1.688	-1084.7	1.688	-1090.4	1.688	-1092.7	1.688	-1097.1
1.689	-1096.6									1.689	-1063.4	1.689	-1066	1.689	-1068.6	1.689	-1073	1.689	-1075.8	1.689	-1079.3	1.689	-1084.4	1.689	-1090.4	1.689	-1092.4	1.689	-1096.6
1.69	-1097.2									1.69	-1063	1.69	-1066.2	1.69	-1068.6	1.69	-1073.1	1.69	-1075.5	1.69	-1079.1	1.69	-1084.9	1.69	-1090.4	1.69	-1092.7	1.69	-1097.2
1.691	-1096.8									1.691	-1063.3	1.691	-1066.2	1.691	-1068.3	1.691	-1073.1	1.691	-1076.1	1.691	-1078.9	1.691	-1085.2	1.691	-1089.1	1.691	-1092.3	1.691	-1096.8
1.692	-1096.5									1.692	-1062.5	1.692	-1066.5	1.692	-1068.2	1.692	-1073.3	1.692	-1076.6	1.692	-1078.7	1.692	-1086	1.692	-1089.3	1.692	-1092.8	1.692	-1096.5
1.693	-1096.7									1.693	-1063	1.693	-1066	1.693	-1068.5	1.693	-1072.6	1.693	-1075.5	1.693	-1078.8	1.693	-1085.8	1.693	-1089.7	1.693	-1092.8	1.693	-1096.7
1.694	-1096.1									1.694	-1063.8	1.694	-1066.4	1.694	-1068.6	1.694	-1072.3	1.694	-1076	1.694	-1078.7	1.694	-1086	1.694	-1088.4	1.694	-1092.8	1.694	-1096.1
1.695	-1096.1									1.695	-1063	1.695	-1066.1	1.695	-1068.8	1.695	-1073.5	1.695	-1075.6	1.695	-1078.4	1.695	-1086.6	1.695	-1088.3	1.695	-1092.4	1.695	-1096.1
1.696	-1096.7									1.696	-1062.9	1.696	-1066.3	1.696	-1069.2	1.696	-1073.3	1.696	-1076.2	1.696	-1078.2	1.696	-1086.7	1.696	-1088.3	1.696	-1093.1	1.696	-1096.7
1.697	-1096.9									1.697	-1062.9	1.697	-1065.8	1.697	-1069.1	1.697	-1072.5	1.697	-1076.4	1.697	-1077.7	1.697	-1086.5	1.697	-1087.8	1.697	-1092.1	1.697	-1096.9
1.698	-1096.6									1.698	-1063.3	1.698	-1065.2	1.698	-1069.6	1.698	-1072.6	1.698	-1076	1.698	-1078.4	1.698	-1086.7	1.698	-1088.2	1.698	-1092.6	1.698	-1096.6
1.699	-1096.7									1.699	-1062.9	1.699	-1066.2	1.699	-1069.9	1.699	-1072.7	1.699	-1075.3	1.699	-1079.1	1.699	-1086.5	1.699	-1087.7	1.699	-1092.6	1.699	-1096.7
1.7	-1096.8									1.7	-1063.7	1.7	-1065.9	1.7	-1070.2	1.7	-1072.9	1.7	-1076.2	1.7	-1079	1.7	-1087.1	1.7	-1088	1.7	-1092.5	1.7	-1096.8
1.701	-1096.9									1.701	-1063.2	1.701	-1065.7	1.701	-1069.6	1.701	-1071.9	1.701	-1076	1.701	-1078.8	1.701	-1086.3	1.701	-1088.1	1.701	-1092.5	1.701	-1096.9
1.702	-1097.7									1.702	-1063.2	1.702	-1065.7	1.702	-1068.8	1.702	-1072.1	1.702	-1076.4	1.702	-1078.8	1.702	-1086.6	1.702	-1087.7	1.702	-1092	1.702	-1097.7
1.703	-1096.9									1.703	-1063.1	1.703	-1066	1.703	-1068.8	1.703	-1071.8	1.703	-1076.3	1.703	-1078.7	1.703	-1086	1.703	-1087.5	1.703	-1092.8	1.703	-1096.9
1.704	-1097.8									1.704	-1063.5	1.704	-1066	1.704	-1068.9	1.704	-1071.7	1.704	-1076.7	1.704	-1078.6	1.704	-1086.8	1.704	-1087.8	1.704	-1092.4	1.704	-1097.8
1.705	-1097									1.705	-1064.1	1.705	-1065.9	1.705	-1068.7	1.705	-1071.8	1.705	-1076.2	1.705	-1078.7	1.705	-1086.2	1.705	-1088	1.705	-1092	1.705	-1097
1.706	-1097.1									1.706	-1064.4	1.706	-1065.4	1.706	-1069.1	1.706	-1072.3	1.706	-1076.7	1.706	-1079.1	1.706	-1086.1	1.706	-1088	1.706	-1092.6	1.706	-1097.1
1.707	-1097.3									1.707	-1064.7	1.707	-1065.6	1.707	-1068.4	1.707	-1072	1.707	-1076.7	1.707	-1079.1	1.707	-1085.6	1.707	-1088.2	1.707	-1092.2	1.707	-1097.3
1.708	-1097.5									1.708	-1064.2	1.708	-1066.2	1.708	-1068.6	1.708	-1072.2	1.708	-1077	1.708	-1079.1	1.708	-1085.9	1.708	-1088.5	1.708	-1093.5	1.708	-1097.5
1.709	-1096.8									1.709	-1064.3	1.709	-1065.6	1.709	-1068.3	1.709	-1072	1.709	-1076.4	1.709	-1080.3	1.709	-1085.6	1.709	-1088.2	1.709	-1092	1.709	-1096.8
1.71	-1097.3									1.71	-1064.5	1.71	-1065.8	1.71	-1069.1	1.71	-1072	1.71	-1077	1.71	-1079.5	1.71	-1085.2	1.71	-1088.6	1.71	-1092.5	1.71	-1097.3
1.711	-1097									1.711	-1064.3	1.711	-1065.7	1.711	-1068.3	1.711	-1071.9	1.711	-1076.5	1.711	-1080.7	1.711	-1084.9	1.711	-1088.8	1.711	-1091.6	1.711	-1097
1.712	-1097.7									1.712	-1064.3	1.712	-1065.5	1.712	-1068.8	1.712	-1072	1.712	-1077.1	1.712	-1079.1	1.712	-1085.1	1.712	-1088.8	1.712	-1092.3	1.712	-1097.7
1.713	-1097.4									1.713	-1064.4	1.713	-1065.4	1.713	-1068.6	1.713	-1071.7	1.713	-1076.8	1.713	-1079.1	1.713	-1085.5	1.713	-1088.8	1.713	-1091.6	1.713	-1097.4
1.714	-1097.1									1.714	-1063.7	1.714	-1065.4	1.714	-1068.7	1.714	-1072.4	1.714	-1076.3	1.714	-1079.2	1.714	-1085.8	1.714	-1089.4	1.714	-1092	1.714	-1097.1
1.715	-1097.1									1.715	-1063.5	1.715	-1065.9	1.715	-1068.6	1.715	-1072.1	1.715	-1076.6	1.715	-1079.5	1.715	-1085.1	1.715	-1089.2	1.715	-1091.1	1.715	-1097.1
1.716	-1097.2									1.716	-1063.7	1.716	-1065.5	1.716	-1068.7	1.716	-1072.3	1.716	-1076.5	1.716	-1079.6	1.716	-1085	1.716	-1089.3	1.716	-1092.3	1.716	-1097.2
1.717	-1097.3									1.717	-1063.6	1.717	-1065.5	1.717	-1068.9	1.717	-1072.1	1.717	-1075.6	1.717	-1079.7	1.717	-1085.1	1.717	-1089.1	1.717	-1091.7	1.717	-1097.3
1.718	-1097.1									1.718	-1063.6	1.718	-1065.8	1.718	-1068.7	1.718	-1072.1	1.718	-1075.2	1.718	-1079.7	1.718	-1085	1.718	-1089.6	1.718	-1092.6	1.718	-1097.1
1.719	-1097.1									1.719	-1063.3	1.719	-1065.2	1.719	-1068.7	1.719	-1071.7	1.719	-1075.6	1.719	-1079.8	1.719	-1084.7	1.719	-1089	1.719	-1092.1	1.719	-1097.1
1.72	-1097.3									1.72	-1064	1.72	-1065.6	1.72	-1069.1	1.72	-1072	1.72	-1075.4	1.72	-1079.2	1.72	-1084.6	1.72	-1088.9	1.72	-1092.7	1.72	-1097.3
1.721	-1097.4									1.721	-1062.7	1.721	-1065	1.721	-1069.2	1.721	-1072.1	1.721	-1075.3	1.721	-1079.7	1.721	-1084.8	1.721	-1088.8	1.721	-1092.3	1.721	-1097.4
1.722	-1097.6									1.722	-1063.1	1.722	-1065.4	1.722	-1069.4	1.722	-1071.3	1.722	-1075.2	1.722	-1079.5	1.722	-1084.6	1.722	-1088.8	1.722	-1092.6	1.722	-1097.6
1.723	-1098.3									1.723	-1062.9	1.723	-1065	1.723	-1068.9	1.723	-1071.4	1.723	-1074.8	1.723	-1079.4	1.723	-1084.6	1.723	-1088.6	1.723	-1092.1	1.723	-1098.3
1.724	-1098.3									1.724	-1063.1	1.724	-1065.7	1.724	-1069.3	1.724	-1071.6	1.724	-1075	1.724	-1079.8	1.724	-1084.3	1.724	-1089.2	1.724	-1092.7	1.724	-1098.3
1.725	-1097.5									1.725	-1062.2	1.725	-1064.7	1.725	-1069	1.725	-1071.6	1.725	-1074.5	1.725	-1079.8	1.725	-1084	1.725	-1088.7	1.725	-1092.7	1.725	-1097.5
1.726	-1097.4									1.726	-1063.3	1.726	-1065.8	1.726	-1069.1	1.726	-1071.3	1.726	-1075	1.726	-1079.5	1.726	-1083.9	1.726	-1089	1.726	-1093.2	1.726	-1097.4
1.727	-1097.8									1.727	-1063	1.727	-1065.3	1.727	-1068.1	1.727	-1071.1	1.727	-1075.3	1.727	-1079.9	1.727	-1083.5	1.727	-1088.8	1.727	-1093	1.727	-1097.8
1.728	-1098									1.728	-1063	1.728	-1065.3	1.728	-1068.1	1.728	-1071.2	1.728	-1075.8	1.728	-1079.6	1.728	-1084	1.728	-1088.7	1.728	-1092.6	1.728	-1098
1.729	-1096.9									1.729	-1062.8	1.729	-1065.6	1.729	-1068.5	1.729	-1071	1.729	-1075.9	1.729	-1080.4	1.729	-1083.6	1.729	-1088.6	1.729	-1092.8	1.729	-1096.9
1.73	-1097.6									1.73	-1062.3	1.73	-1065.1	1.73	-1068.8	1.73	-1071.2	1.73	-1076	1.73	-1080.3	1.73	-1083.7	1.73	-1089	1.73	-1093.2	1.73	-1097.6
1.731	-1097									1.731	-1063	1.731	-1065.1	1.731	-1069.1	1.731	-1070.7	1.731	-1075.9	1.731	-1080.3	1.731	-1083.5	1.731	-1088.2	1.731	-1092.8	1.731	-1097
1.732	-1096.6									1.732	-1063	1.732	-1065.1	1.732	-1068.7	1.732	-1071.7	1.732	-1076.1	1.732	-1079.8	1.732	-1083.7	1.732	-1087.9	1.732	-1093.1	1.732	-1096.6
1.733	-1096.4									1.733	-1062.4	1.733	-1064.2	1.733	-1068.7	1.733	-1071	1.733	-1076.1	1.733	-1080.1	1.733	-1084.1	1.733	-1088.2	1.733	-1092.8	1.733	-1096.4
1.734	-1096.5									1.734	-1063.2	1.734	-1064.8	1.734	-1068.9	1.734	-1071.7	1.734	-1075.1	1.734	-1080.8	1.734	-1084.2	1.734	-1088.5	1.734	-1093.5	1.734	-1096.5
1.735	-1097									1.735	-1062.7	1.735	-1065.1	1.735	-1068.7	1.735	-1070.9	1.735	-1075.6	1.735	-1078.7	1.735	-1083.2	1.735	-1089.3	1.735	-1093.1	1.735	-1097
1.736	-1096.2									1.736	-1062.9	1.736	-1065.5	1.736	-1069.6	1.736	-1070.7	1.736	-1075.1	1.736	-1079.3	1.736	-1083.5	1.736	-1089.4	1.736	-1093.4	1.736	-1096.2
1.737	-1095.4									1.737	-1063.1	1.737	-1065.1	1.737	-1069.8	1.737	-1070.3	1.737	-1075.4	1.737	-1080	1.737	-1083.1	1.737	-1089.7	1.737	-1094	1.737	-1095.4
1.738	-1095.5									1.738	-1063.6	1.738	-1065.9	1.738	-1070.1	1.738	-1070.7	1.738	-1075.4	1.738	-1079.6	1.738	-1085.8	1.738	-1090	1.738	-1093.6	1.738	-1095.5
1.739	-1096.1									1.739	-1062.6	1.739	-1066.4	1.739	-1069.8	1.739	-1071.1	1.739	-1075.1	1.739	-1080.7	1.739	-1085.8	1.739	-1089	1.739	-1093.1	1.739	-1096.1
1.74	-1095.7									1.74	-1062.9	1.74	-1066.6	1.74	-1069.8	1.74	-1071.1	1.74	-1075.3	1.74	-1080.3	1.74	-1087	1.74	-1089.1	1.74	-1093.9	1.74	-1095.7
1.741	-1095.1									1.741	-1062.8	1.741	-1066.3	1.741	-1069.3	1.741	-1071.2	1.741	-1074.8	1.741	-1080.5	1.741	-1085.3	1.741	-1088.5	1.741	-1093.7	1.741	-1095.1
1.742	-1095.5									1.742	-1062.7	1.742	-1066.9	1.742	-1069.4	1.742	-1071	1.742	-1075	1.742	-1080.3	1.742	-1085.1	1.742	-1089	1.742	-1094.3	1.742	-1095.5
1.743	-1095.8									1.743	-1062.8	1.743	-1066.3	1.743	-1068.4	1.743	-1071	1.743	-1075	1.743	-1080.5	1.743	-1084.3	1.743	-1088.5	1.743	-1093.4	1.743	-1095.8
1.744	-1095.6									1.744	-1063.2	1.744	-1067.1	1.744	-1069.1	1.744	-1070.2	1.744	-1075	1.744	-1080.9	1.744	-1085.1	1.744	-1088.7	1.744	-1093.6	1.744	-1095.6
1.745	-1095									1.745	-1062.6	1.745	-1066.4	1.745	-1069.6	1.745	-1070.5	1.745	-1075	1.745	-1081.3	1.745	-1085.5	1.745	-1088.2	1.745	-1093.1	1.745	-1095
1.746	-1095.7									1.746	-1062.3	1.746	-1065.9	1.746	-1069.5	1.746	-1070.3	1.746	-1075.4	1.746	-1081.2	1.746	-1085	1.746	-1088.6	1.746	-1093.4	1.746	-1095.7
1.747	-1096.2									1.747	-1062.8	1.747	-1065.3	1.747	-1069.6	1.747	-1070.9	1.747	-1074.8	1.747	-1081	1.747	-1085.2	1.747	-1089	1.747	-1092.5	1.747	-1096.2
1.748	-1097.4									1.748	-1062.5	1.748	-1065.8	1.748	-1069.8	1.748	-1071.4	1.748	-1075	1.748	-1080.9	1.748	-1085.1	1.748	-1089.5	1.748	-1093.4	1.748	-1097.4
1.749	-1097.1									1.749	-1062.7	1.749	-1065.8	1.749	-1069.7	1.749	-1071.4	1.749	-1074.3	1.749	-1080.7	1.749	-1084.9	1.749	-1089.3	1.749	-1092.3	1.749	-1097.1
1.75	-1098									1.75	-1062.3	1.75	-1065.7	1.75	-1069.7	1.75	-1071.8	1.75	-1075	1.75	-1080.5	1.75	-1085.8	1.75	-1089.7	1.75	-1093.4	1.75	-1098
1.751	-1097.9									1.751	-1062.1	1.751	-1066.7	1.751	-1070.2	1.751	-1071.2	1.751	-1074.3	1.751	-1080.8	1.751	-1085.9	1.751	-1089.4	1.751	-1092.8	1.751	-1097.9
1.752	-1098.5									1.752	-1062.3	1.752	-1066.9	1.752	-1070.2	1.752	-1071.3	1.752	-1074.9	1.752	-1081	1.752	-1086.7	1.752	-1089.9	1.752	-1092.9	1.752	-1098.5
1.753	-1098.4									1.753	-1062	1.753	-1067	1.753	-1070.1	1.753	-1070.6	1.753	-1074.5	1.753	-1081.9	1.753	-1086.7	1.753	-1089.6	1.753	-1092.5	1.753	-1098.4
1.754	-1098.4									1.754	-1061.9	1.754	-1067	1.754	-1069.7	1.754	-1070.6	1.754	-1075.5	1.754	-1081.4	1.754	-1087.8	1.754	-1089.7	1.754	-1092.5	1.754	-1098.4
1.755	-1098.5									1.755	-1061.7	1.755	-1067.1	1.755	-1069.8	1.755	-1071.1	1.755	-1074.4	1.755	-1081.7	1.755	-1087.4	1.755	-1089.7	1.755	-1092.5	1.755	-1098.5
1.756	-1098.6									1.756	-1061.4	1.756	-1067.2	1.756	-1070.1	1.756	-1071	1.756	-1075.2	1.756	-1081.9	1.756	-1088.1	1.756	-1089.5	1.756	-1092.5	1.756	-1098.6
1.757	-1098.5									1.757	-1061.5	1.757	-1067.5	1.757	-1070.1	1.757	-1070.8	1.757	-1075	1.757	-1082.1	1.757	-1087.8	1.757	-1089.5	1.757	-1092.9	1.757	-1098.5
1.758	-1098.8									1.758	-1061.5	1.758	-1067.7	1.758	-1069.8	1.758	-1071.4	1.758	-1074.7	1.758	-1081.7	1.758	-1088.4	1.758	-1089.6	1.758	-1093.3	1.758	-1098.8
1.759	-1098									1.759	-1060.7	1.759	-1067.6	1.759	-1070	1.759	-1071.5	1.759	-1075.5	1.759	-1082.1	1.759	-1087.9	1.759	-1089.2	1.759	-1092.6	1.759	-1098
1.76	-1098.7									1.76	-1061.8	1.76	-1068	1.76	-1069.6	1.76	-1072.2	1.76	-1075.4	1.76	-1081.7	1.76	-1087.9	1.76	-1089.5	1.76	-1092.4	1.76	-1098.7
1.761	-1098.4									1.761	-1061.6	1.761	-1067.3	1.761	-1069.3	1.761	-1072.2	1.761	-1074.5	1.761	-1081.9	1.761	-1087	1.761	-1088.6	1.761	-1092.4	1.761	-1098.4
1.762	-1098.7									1.762	-1062.1	1.762	-1067.4	1.762	-1069.3	1.762	-1072.7	1.762	-1075	1.762	-1077.5	1.762	-1086.9	1.762	-1089.3	1.762	-1092.6	1.762	-1098.7
1.763	-1098.7									1.763	-1061.4	1.763	-1067.5	1.763	-1069.1	1.763	-1070.8	1.763	-1074.8	1.763	-1078.9	1.763	-1086.7	1.763	-1088.7	1.763	-1092.4	1.763	-1098.7
1.764	-1098									1.764	-1061	1.764	-1067.5	1.764	-1069.6	1.764	-1070.8	1.764	-1075.2	1.764	-1079.1	1.764	-1086.9	1.764	-1088.9	1.764	-1092.6	1.764	-1098
1.765	-1097.8									1.765	-1061	1.765	-1067.2	1.765	-1069.4	1.765	-1069.7	1.765	-1075.2	1.765	-1079.1	1.765	-1086.3	1.765	-1088.8	1.765	-1092.6	1.765	-1097.8
1.766	-1097.9									1.766	-1061.4	1.766	-1067.5	1.766	-1069.9	1.766	-1070.2	1.766	-1075.8	1.766	-1079.1	1.766	-1086.5	1.766	-1089.6	1.766	-1092.6	1.766	-1097.9
1.767	-1097.9									1.767	-1061.2	1.767	-1067.3	1.767	-1069.9	1.767	-1071.4	1.767	-1075	1.767	-1079.1	1.767	-1086.2	1.767	-1089.3	1.767	-1092.5	1.767	-1097.9
1.768	-1097.4									1.768	-1061.6	1.768	-1066.9	1.768	-1069.9	1.768	-1071.4	1.768	-1075.6	1.768	-1079.5	1.768	-1087	1.768	-1090.1	1.768	-1092.6	1.768	-1097.4
1.769	-1096.2									1.769	-1061.8	1.769	-1067	1.769	-1070	1.769	-1070.9	1.769	-1075	1.769	-1079.9	1.769	-1085.7	1.769	-1090.3	1.769	-1092.3	1.769	-1096.2
1.77	-1096.5									1.77	-1062	1.77	-1066.9	1.77	-1069.6	1.77	-1070.9	1.77	-1076	1.77	-1079.3	1.77	-1086.2	1.77	-1090.6	1.77	-1092.5	1.77	-1096.5
1.771	-1097.1									1.771	-1061.8	1.771	-1066.5	1.771	-1069.4	1.771	-1070.7	1.771	-1076	1.771	-1079.8	1.771	-1085.7	1.771	-1090.2	1.771	-1092.3	1.771	-1097.1
1.772	-1097.2									1.772	-1061.6	1.772	-1066.9	1.772	-1070.3	1.772	-1070.9	1.772	-1076.1	1.772	-1079.3	1.772	-1086.2	1.772	-1090.9	1.772	-1092.4	1.772	-1097.2
1.773	-1097.1									1.773	-1061.2	1.773	-1066.9	1.773	-1069.6	1.773	-1070.8	1.773	-1075.4	1.773	-1079.8	1.773	-1085.4	1.773	-1090.4	1.773	-1092.7	1.773	-1097.1
1.774	-1096.8									1.774	-1061.8	1.774	-1067.1	1.774	-1069.8	1.774	-1070.7	1.774	-1075.2	1.774	-1079.8	1.774	-1085.5	1.774	-1090.8	1.774	-1092.6	1.774	-1096.8
1.775	-1097.1									1.775	-1061.8	1.775	-1067	1.775	-1069.5	1.775	-1070.7	1.775	-1075.3	1.775	-1080.5	1.775	-1084.6	1.775	-1091	1.775	-1092.2	1.775	-1097.1
1.776	-1097.3									1.776	-1061.5	1.776	-1067.3	1.776	-1069.2	1.776	-1070.8	1.776	-1076.1	1.776	-1078.8	1.776	-1085.3	1.776	-1091.7	1.776	-1092.5	1.776	-1097.3
1.777	-1096.1									1.777	-1061.8	1.777	-1066.9	1.777	-1069.3	1.777	-1070.7	1.777	-1076.2	1.777	-1079.3	1.777	-1084.6	1.777	-1090.1	1.777	-1092.3	1.777	-1096.1
1.778	-1096									1.778	-1062	1.778	-1066.7	1.778	-1068.9	1.778	-1071.2	1.778	-1075.9	1.778	-1079	1.778	-1084.6	1.778	-1090.7	1.778	-1092.7	1.778	-1096
1.779	-1096.4									1.779	-1061.5	1.779	-1066.4	1.779	-1068.8	1.779	-1070.5	1.779	-1076	1.779	-1079.3	1.779	-1084.5	1.779	-1090	1.779	-1092.8	1.779	-1096.4
1.78	-1097									1.78	-1061.7	1.78	-1066.6	1.78	-1069.4	1.78	-1070.6	1.78	-1076.2	1.78	-1079.3	1.78	-1084.5	1.78	-1090.5	1.78	-1093.3	1.78	-1097
1.781	-1096.4									1.781	-1061.6	1.781	-1066	1.781	-1068.5	1.781	-1070.4	1.781	-1076.8	1.781	-1079.8	1.781	-1084.6	1.781	-1090.6	1.781	-1093.4	1.781	-1096.4
1.782	-1097									1.782	-1061.7	1.782	-1066.3	1.782	-1069.1	1.782	-1070.5	1.782	-1077.2	1.782	-1079.5	1.782	-1084.5	1.782	-1090.9	1.782	-1093.8	1.782	-1097
1.783	-1096.8									1.783	-1062.2	1.783	-1065.4	1.783	-1069	1.783	-1070.2	1.783	-1076.9	1.783	-1079.4	1.783	-1085	1.783	-1090.3	1.783	-1093.2	1.783	-1096.8
1.784	-1096.9									1.784	-1062.4	1.784	-1064.9	1.784	-1069.4	1.784	-1070	1.784	-1077.3	1.784	-1079.3	1.784	-1084.9	1.784	-1091	1.784	-1094	1.784	-1096.9
1.785	-1096.8									1.785	-1062.4	1.785	-1065.4	1.785	-1069.4	1.785	-1070.7	1.785	-1077.3	1.785	-1079.3	1.785	-1085	1.785	-1090.7	1.785	-1093.4	1.785	-1096.8
1.786	-1097.2									1.786	-1062	1.786	-1065.8	1.786	-1069.1	1.786	-1070.8	1.786	-1077.6	1.786	-1079.3	1.786	-1085.1	1.786	-1091.2	1.786	-1094.2	1.786	-1097.2
1.787	-1098.3									1.787	-1061.7	1.787	-1065.8	1.787	-1069.6	1.787	-1070.3	1.787	-1077.1	1.787	-1078.7	1.787	-1085.1	1.787	-1090.6	1.787	-1093.4	1.787	-1098.3
1.788	-1098.6									1.788	-1061.5	1.788	-1065.6	1.788	-1069.6	1.788	-1070.7	1.788	-1077.5	1.788	-1078.4	1.788	-1084.4	1.788	-1091.1	1.788	-1093.9	1.788	-1098.6
1.789	-1098.2									1.789	-1061.6	1.789	-1065.8	1.789	-1069.7	1.789	-1070.6	1.789	-1077.5	1.789	-1078.4	1.789	-1084.9	1.789	-1090.4	1.789	-1093.7	1.789	-1098.2
1.79	-1098.4									1.79	-1061.1	1.79	-1066.1	1.79	-1069.6	1.79	-1070.9	1.79	-1077.6	1.79	-1078.2	1.79	-1085.4	1.79	-1091.5	1.79	-1093.7	1.79	-1098.4
1.791	-1098									1.791	-1061.1	1.791	-1066.9	1.791	-1069.3	1.791	-1070.8	1.791	-1075.3	1.791	-1078.1	1.791	-1085.2	1.791	-1091.2	1.791	-1093.5	1.791	-1098
1.792	-1098.9									1.792	-1061.5	1.792	-1065.6	1.792	-1069.2	1.792	-1070.9	1.792	-1075.8	1.792	-1077.8	1.792	-1085	1.792	-1089.6	1.792	-1093.6	1.792	-1098.9
1.793	-1098.1									1.793	-1062	1.793	-1066.2	1.793	-1068.6	1.793	-1071	1.793	-1075.5	1.793	-1078.3	1.793	-1084.7	1.793	-1089.6	1.793	-1093.8	1.793	-1098.1
1.794	-1099.1									1.794	-1062.1	1.794	-1065.4	1.794	-1068.9	1.794	-1071.6	1.794	-1076.1	1.794	-1078.2	1.794	-1085.1	1.794	-1090.8	1.794	-1093.5	1.794	-1099.1
1.795	-1099.5									1.795	-1061.7	1.795	-1065.4	1.795	-1068.6	1.795	-1071.8	1.795	-1075.3	1.795	-1078.3	1.795	-1084.6	1.795	-1090.3	1.795	-1093.6	1.795	-1099.5
1.796	-1098.9									1.796	-1062.2	1.796	-1065.6	1.796	-1068.8	1.796	-1072.3	1.796	-1075.9	1.796	-1078.2	1.796	-1085.1	1.796	-1090.6	1.796	-1094.3	1.796	-1098.9
1.797	-1099.1									1.797	-1061.4	1.797	-1060.9	1.797	-1067.6	1.797	-1071.5	1.797	-1075.4	1.797	-1078.2	1.797	-1084.3	1.797	-1090.9	1.797	-1093.5	1.797	-1099.1
1.798	-1099.2									1.798	-1062.2	1.798	-1060.1	1.798	-1068.7	1.798	-1071.8	1.798	-1074.9	1.798	-1078.2	1.798	-1085.1	1.798	-1090.6	1.798	-1093.6	1.798	-1099.2
1.799	-1100									1.799	-1061.8	1.799	-1061.3	1.799	-1068.3	1.799	-1071	1.799	-1074.9	1.799	-1078.4	1.799	-1084.4	1.799	-1089.8	1.799	-1093.8	1.799	-1100
1.8	-1099.5									1.8	-1062.6	1.8	-1063.5	1.8	-1068.7	1.8	-1071.2	1.8	-1074.7	1.8	-1077.7	1.8	-1084.9	1.8	-1090.4	1.8	-1093.4	1.8	-1099.5
1.801	-1098.8									1.801	-1062	1.801	-1065.5	1.801	-1068.7	1.801	-1071.2	1.801	-1075	1.801	-1078.2	1.801	-1084.9	1.801	-1089.6	1.801	-1093.3	1.801	-1098.8
1.802	-1098.8									1.802	-1061.6	1.802	-1065.1	1.802	-1069.2	1.802	-1071.4	1.802	-1075.6	1.802	-1078.2	1.802	-1085.1	1.802	-1089.6	1.802	-1092.7	1.802	-1098.8
1.803	-1099									1.803	-1061.7	1.803	-1062.7	1.803	-1068.6	1.803	-1071.2	1.803	-1074.9	1.803	-1078.6	1.803	-1086.2	1.803	-1089.7	1.803	-1092.7	1.803	-1099
1.804	-1098.9									1.804	-1062.2	1.804	-1064.3	1.804	-1069.5	1.804	-1071.1	1.804	-1075.2	1.804	-1078.3	1.804	-1086.2	1.804	-1089.9	1.804	-1093.1	1.804	-1098.9
1.805	-1099.1									1.805	-1061.6	1.805	-1065.4	1.805	-1068.9	1.805	-1070.6	1.805	-1075.4	1.805	-1078.3	1.805	-1085.1	1.805	-1089.9	1.805	-1093.2	1.805	-1099.1
1.806	-1099									1.806	-1061.3	1.806	-1065.7	1.806	-1069.6	1.806	-1071.1	1.806	-1075.3	1.806	-1078.4	1.806	-1085.7	1.806	-1090.3	1.806	-1093.1	1.806	-1099
1.807	-1099.1									1.807	-1061	1.807	-1065	1.807	-1069.1	1.807	-1070.7	1.807	-1074.2	1.807	-1078.9	1.807	-1085.5	1.807	-1089.5	1.807	-1093	1.807	-1099.1
1.808	-1099.5									1.808	-1061.5	1.808	-1063.9	1.808	-1069.4	1.808	-1071.3	1.808	-1074.2	1.808	-1078.8	1.808	-1086.2	1.808	-1090.1	1.808	-1093	1.808	-1099.5
1.809	-1098.9									1.809	-1061.1	1.809	-1063.7	1.809	-1069.4	1.809	-1070.6	1.809	-1073.7	1.809	-1078.9	1.809	-1084.9	1.809	-1089.7	1.809	-1092.9	1.809	-1098.9
1.81	-1099									1.81	-1061.3	1.81	-1064.1	1.81	-1069.4	1.81	-1070.8	1.81	-1073.9	1.81	-1078.9	1.81	-1084.7	1.81	-1089.4	1.81	-1093.5	1.81	-1099
1.811	-1099.3									1.811	-1061.2	1.811	-1064.1	1.811	-1069.2	1.811	-1070.4	1.811	-1073.5	1.811	-1079.3	1.811	-1084.7	1.811	-1089.5	1.811	-1093.1	1.811	-1099.3
1.812	-1099.5									1.812	-1061.7	1.812	-1064.6	1.812	-1069.6	1.812	-1071.1	1.812	-1073.9	1.812	-1079.1	1.812	-1084.6	1.812	-1090.1	1.812	-1093.2	1.812	-1099.5
1.813	-1099.6									1.813	-1061.5	1.813	-1064.1	1.813	-1069	1.813	-1070.9	1.813	-1073.7	1.813	-1079.3	1.813	-1085.2	1.813	-1089.8	1.813	-1092.6	1.813	-1099.6
1.814	-1099.4									1.814	-1061.5	1.814	-1064.1	1.814	-1069.6	1.814	-1070.7	1.814	-1073.7	1.814	-1079.3	1.814	-1084.6	1.814	-1090	1.814	-1093.7	1.814	-1099.4
1.815	-1099.4									1.815	-1061.7	1.815	-1064.1	1.815	-1069.2	1.815	-1069.6	1.815	-1073.2	1.815	-1079.7	1.815	-1084.4	1.815	-1089.9	1.815	-1092.8	1.815	-1099.4
1.816	-1099.9									1.816	-1061.4	1.816	-1065.5	1.816	-1068.6	1.816	-1070.5	1.816	-1073.4	1.816	-1079.4	1.816	-1084.8	1.816	-1090.2	1.816	-1093	1.816	-1099.9
1.817	-1099.3									1.817	-1061.9	1.817	-1065.1	1.817	-1068.9	1.817	-1069.8	1.817	-1073.4	1.817	-1079.3	1.817	-1083.7	1.817	-1090.1	1.817	-1093.2	1.817	-1099.3
1.818	-1099.9									1.818	-1061.3	1.818	-1065.1	1.818	-1069.2	1.818	-1070.2	1.818	-1073	1.818	-1079.1	1.818	-1084.3	1.818	-1089.5	1.818	-1092.3	1.818	-1099.9
1.819	-1099.2									1.819	-1061.8	1.819	-1064.8	1.819	-1068.7	1.819	-1070	1.819	-1073.7	1.819	-1080.2	1.819	-1085	1.819	-1089.6	1.819	-1092.3	1.819	-1099.2
1.82	-1099.7									1.82	-1061.8	1.82	-1064.9	1.82	-1068.7	1.82	-1070.1	1.82	-1073.8	1.82	-1080.8	1.82	-1085.1	1.82	-1089.4	1.82	-1092.6	1.82	-1099.7
1.821	-1099.3									1.821	-1062.1	1.821	-1064.7	1.821	-1068.4	1.821	-1069.3	1.821	-1074.1	1.821	-1077.4	1.821	-1085.3	1.821	-1089.4	1.821	-1091.1	1.821	-1099.3
1.822	-1098.9									1.822	-1062.2	1.822	-1065	1.822	-1068.6	1.822	-1069.7	1.822	-1074	1.822	-1077.5	1.822	-1085.5	1.822	-1089	1.822	-1092.2	1.822	-1098.9
1.823	-1099.1									1.823	-1062.1	1.823	-1064	1.823	-1068.4	1.823	-1069.4	1.823	-1073.9	1.823	-1077.4	1.823	-1085.1	1.823	-1089.5	1.823	-1092.1	1.823	-1099.1
1.824	-1099.5									1.824	-1062.5	1.824	-1064.4	1.824	-1068.8	1.824	-1069.9	1.824	-1074	1.824	-1077.2	1.824	-1085.3	1.824	-1089.3	1.824	-1093.1	1.824	-1099.5
1.825	-1099									1.825	-1063.1	1.825	-1064.3	1.825	-1068.4	1.825	-1069.9	1.825	-1073.2	1.825	-1077.2	1.825	-1085.2	1.825	-1089.8	1.825	-1092.9	1.825	-1099
1.826	-1098.6									1.826	-1063	1.826	-1064.9	1.826	-1068.9	1.826	-1070.3	1.826	-1074.1	1.826	-1077.4	1.826	-1084.9	1.826	-1089.7	1.826	-1093.8	1.826	-1098.6
1.827	-1099									1.827	-1063.3	1.827	-1065.4	1.827	-1068.6	1.827	-1070.6	1.827	-1073.9	1.827	-1077.6	1.827	-1084	1.827	-1090.3	1.827	-1092.9	1.827	-1099
1.828	-1099.1									1.828	-1063.3	1.828	-1065.9	1.828	-1069.1	1.828	-1070.8	1.828	-1074.3	1.828	-1078.9	1.828	-1084.4	1.828	-1090.4	1.828	-1093.1	1.828	-1099.1
1.829	-1098.6									1.829	-1063	1.829	-1065.9	1.829	-1068.3	1.829	-1070.5	1.829	-1074	1.829	-1078.4	1.829	-1084.6	1.829	-1089.5	1.829	-1093.1	1.829	-1098.6
1.83	-1098.8									1.83	-1063.7	1.83	-1066.4	1.83	-1069.3	1.83	-1070.7	1.83	-1074.5	1.83	-1078.2	1.83	-1082.5	1.83	-1090.1	1.83	-1093.7	1.83	-1098.8
1.831	-1098.7									1.831	-1062.8	1.831	-1065.8	1.831	-1068.7	1.831	-1070.7	1.831	-1074.4	1.831	-1079.1	1.831	-1083	1.831	-1089.5	1.831	-1093.2	1.831	-1098.7
1.832	-1099									1.832	-1062.7	1.832	-1066.3	1.832	-1068.9	1.832	-1069.8	1.832	-1074.4	1.832	-1079	1.832	-1081.9	1.832	-1089.9	1.832	-1093.2	1.832	-1099
1.833	-1098.5									1.833	-1062.4	1.833	-1066.3	1.833	-1068.4	1.833	-1070.2	1.833	-1073.9	1.833	-1079	1.833	-1082.2	1.833	-1089.9	1.833	-1093.9	1.833	-1098.5
1.834	-1098.9									1.834	-1062.9	1.834	-1066.1	1.834	-1068.6	1.834	-1070.4	1.834	-1075	1.834	-1078.7	1.834	-1082.3	1.834	-1090.2	1.834	-1093.6	1.834	-1098.9
1.835	-1098.7									1.835	-1062.8	1.835	-1066.2	1.835	-1068	1.835	-1070	1.835	-1073.4	1.835	-1078.6	1.835	-1082.5	1.835	-1090	1.835	-1093.6	1.835	-1098.7
1.836	-1099.4									1.836	-1063.1	1.836	-1066.2	1.836	-1068.7	1.836	-1070.6	1.836	-1073.1	1.836	-1078.3	1.836	-1082.2	1.836	-1089.9	1.836	-1094.2	1.836	-1099.4
1.837	-1098.2									1.837	-1062.9	1.837	-1066	1.837	-1067.7	1.837	-1070.3	1.837	-1073.5	1.837	-1079	1.837	-1082.8	1.837	-1089.9	1.837	-1094.2	1.837	-1098.2
1.838	-1099									1.838	-1063.2	1.838	-1066.3	1.838	-1068.4	1.838	-1071.2	1.838	-1073.5	1.838	-1078.3	1.838	-1082.5	1.838	-1089.8	1.838	-1094.2	1.838	-1099
1.839	-1097.9									1.839	-1063.4	1.839	-1066.2	1.839	-1068.3	1.839	-1070.7	1.839	-1073.1	1.839	-1078.8	1.839	-1083.2	1.839	-1089.3	1.839	-1093.6	1.839	-1097.9
1.84	-1098.3									1.84	-1062.6	1.84	-1066.1	1.84	-1068.7	1.84	-1071.5	1.84	-1073.9	1.84	-1077.8	1.84	-1083.1	1.84	-1089.4	1.84	-1094.1	1.84	-1098.3
1.841	-1097.3									1.841	-1062.3	1.841	-1065.9	1.841	-1068.1	1.841	-1071.4	1.841	-1073.9	1.841	-1078.6	1.841	-1083.3	1.841	-1089.8	1.841	-1094.9	1.841	-1097.3
1.842	-1097.1									1.842	-1062.2	1.842	-1065.6	1.842	-1068.6	1.842	-1071.5	1.842	-1073.9	1.842	-1078	1.842	-1082.7	1.842	-1089.7	1.842	-1093.6	1.842	-1097.1
1.843	-1096.9									1.843	-1062.2	1.843	-1065.7	1.843	-1068.2	1.843	-1071.6	1.843	-1073.2	1.843	-1078.7	1.843	-1081.7	1.843	-1089.2	1.843	-1093.5	1.843	-1096.9
1.844	-1096.8									1.844	-1062.4	1.844	-1065.9	1.844	-1068.4	1.844	-1072.4	1.844	-1073.6	1.844	-1078.5	1.844	-1081.8	1.844	-1090	1.844	-1092.6	1.844	-1096.8
1.845	-1096.8									1.845	-1062	1.845	-1065.5	1.845	-1067.9	1.845	-1071.8	1.845	-1072.4	1.845	-1078.7	1.845	-1081.4	1.845	-1089.7	1.845	-1092.5	1.845	-1096.8
1.846	-1096.9									1.846	-1061.9	1.846	-1065.6	1.846	-1068.5	1.846	-1071.6	1.846	-1073.6	1.846	-1077.9	1.846	-1081.9	1.846	-1089.2	1.846	-1092.5	1.846	-1096.9
1.847	-1096.7									1.847	-1061.8	1.847	-1065.6	1.847	-1068	1.847	-1071.8	1.847	-1073.1	1.847	-1078.2	1.847	-1081.9	1.847	-1089.1	1.847	-1092.7	1.847	-1096.7
1.848	-1096.9									1.848	-1062.3	1.848	-1065.6	1.848	-1067.9	1.848	-1072	1.848	-1073.4	1.848	-1078.3	1.848	-1081.9	1.848	-1089.7	1.848	-1093.1	1.848	-1096.9
1.849	-1096.9									1.849	-1062.2	1.849	-1065.2	1.849	-1067.7	1.849	-1071.2	1.849	-1073.1	1.849	-1078.1	1.849	-1081.9	1.849	-1088.8	1.849	-1093.2	1.849	-1096.9
1.85	-1097.1									1.85	-1062.3	1.85	-1065.1	1.85	-1068.1	1.85	-1071.4	1.85	-1073.4	1.85	-1078.4	1.85	-1081.9	1.85	-1089.2	1.85	-1093.8	1.85	-1097.1
1.851	-1096.8									1.851	-1062.1	1.851	-1065.1	1.851	-1067.5	1.851	-1071	1.851	-1073.2	1.851	-1078.6	1.851	-1083	1.851	-1089.1	1.851	-1092.9	1.851	-1096.8
1.852	-1097									1.852	-1063	1.852	-1064.7	1.852	-1067.8	1.852	-1070.6	1.852	-1073.6	1.852	-1078.4	1.852	-1083.5	1.852	-1089.3	1.852	-1093.2	1.852	-1097
1.853	-1096.7									1.853	-1062.5	1.853	-1064.7	1.853	-1067.3	1.853	-1071	1.853	-1072.8	1.853	-1078.7	1.853	-1084	1.853	-1088.3	1.853	-1093	1.853	-1096.7
1.854	-1097									1.854	-1063.4	1.854	-1064.4	1.854	-1067.9	1.854	-1071.1	1.854	-1073.2	1.854	-1078.4	1.854	-1084.6	1.854	-1088.8	1.854	-1093.6	1.854	-1097
1.855	-1097.1									1.855	-1063.5	1.855	-1064.1	1.855	-1067.4	1.855	-1070.4	1.855	-1073.2	1.855	-1078.4	1.855	-1084.8	1.855	-1088.8	1.855	-1093.5	1.855	-1097.1
1.856	-1097.2									1.856	-1064	1.856	-1064.4	1.856	-1067.5	1.856	-1070.8	1.856	-1073.6	1.856	-1078.2	1.856	-1085.7	1.856	-1089.1	1.856	-1093.5	1.856	-1097.2
1.857	-1097.5									1.857	-1064.1	1.857	-1064.3	1.857	-1067.3	1.857	-1071	1.857	-1073.8	1.857	-1078.5	1.857	-1085.4	1.857	-1088.6	1.857	-1093.5	1.857	-1097.5
1.858	-1097.4									1.858	-1064.2	1.858	-1064.1	1.858	-1068	1.858	-1071.8	1.858	-1074	1.858	-1078.7	1.858	-1085.6	1.858	-1088.6	1.858	-1093.7	1.858	-1097.4
1.859	-1097.3									1.859	-1063.8	1.859	-1064.7	1.859	-1067.7	1.859	-1071	1.859	-1074.1	1.859	-1078.9	1.859	-1085.1	1.859	-1088.8	1.859	-1093.3	1.859	-1097.3
1.86	-1096.7									1.86	-1064	1.86	-1064.4	1.86	-1068.1	1.86	-1071.5	1.86	-1074.5	1.86	-1079.3	1.86	-1085.7	1.86	-1089.6	1.86	-1093.4	1.86	-1096.7
1.861	-1097.1									1.861	-1064.3	1.861	-1064.8	1.861	-1067.7	1.861	-1071.1	1.861	-1074.5	1.861	-1078.9	1.861	-1084.7	1.861	-1089	1.861	-1092.9	1.861	-1097.1
1.862	-1097.3									1.862	-1064.2	1.862	-1065.1	1.862	-1068.4	1.862	-1070.6	1.862	-1074.7	1.862	-1078.9	1.862	-1084.8	1.862	-1089.4	1.862	-1093.1	1.862	-1097.3
1.863	-1096.8									1.863	-1064	1.863	-1065.3	1.863	-1068.6	1.863	-1070.9	1.863	-1074.7	1.863	-1078.8	1.863	-1084.2	1.863	-1088.1	1.863	-1093.1	1.863	-1096.8
1.864	-1096.9									1.864	-1064.7	1.864	-1065.7	1.864	-1068.8	1.864	-1070.1	1.864	-1074.6	1.864	-1078.7	1.864	-1084	1.864	-1088.2	1.864	-1093.6	1.864	-1096.9
1.865	-1096.8									1.865	-1064.3	1.865	-1066	1.865	-1068.1	1.865	-1068.8	1.865	-1074.9	1.865	-1078.8	1.865	-1084	1.865	-1087.7	1.865	-1093.2	1.865	-1096.8
1.866	-1097.1									1.866	-1064.1	1.866	-1065.8	1.866	-1067.9	1.866	-1070	1.866	-1074.8	1.866	-1079	1.866	-1084.1	1.866	-1088.5	1.866	-1093.3	1.866	-1097.1
1.867	-1097.2									1.867	-1064.4	1.867	-1065.9	1.867	-1068.2	1.867	-1068.9	1.867	-1075	1.867	-1078.6	1.867	-1083.2	1.867	-1088.7	1.867	-1093.1	1.867	-1097.2
1.868	-1097.5									1.868	-1064.4	1.868	-1066.2	1.868	-1068.6	1.868	-1069.6	1.868	-1075.4	1.868	-1079.3	1.868	-1083	1.868	-1088.7	1.868	-1093.1	1.868	-1097.5
1.869	-1096.5									1.869	-1064.5	1.869	-1066.1	1.869	-1068.5	1.869	-1069	1.869	-1075.3	1.869	-1078.7	1.869	-1082	1.869	-1088.7	1.869	-1092.5	1.869	-1096.5
1.87	-1096.9									1.87	-1064.2	1.87	-1066.4	1.87	-1068.5	1.87	-1070.2	1.87	-1075.3	1.87	-1078.5	1.87	-1082.7	1.87	-1088.6	1.87	-1093.5	1.87	-1096.9
1.871	-1096.9									1.871	-1063.6	1.871	-1066.5	1.871	-1069	1.871	-1069.8	1.871	-1074.9	1.871	-1078.6	1.871	-1082.9	1.871	-1087.6	1.871	-1093.3	1.871	-1096.9
1.872	-1097.1									1.872	-1064.5	1.872	-1067.4	1.872	-1068.7	1.872	-1070.4	1.872	-1075.6	1.872	-1078.3	1.872	-1082.6	1.872	-1088.7	1.872	-1093	1.872	-1097.1
1.873	-1096.8									1.873	-1064	1.873	-1066.7	1.873	-1068.6	1.873	-1070.4	1.873	-1075.1	1.873	-1078.8	1.873	-1082.4	1.873	-1088.3	1.873	-1093.2	1.873	-1096.8
1.874	-1096.6									1.874	-1063	1.874	-1066.4	1.874	-1069	1.874	-1070.8	1.874	-1075.7	1.874	-1077.6	1.874	-1081.9	1.874	-1088.5	1.874	-1093.9	1.874	-1096.6
1.875	-1096.7									1.875	-1062.8	1.875	-1066.5	1.875	-1069.3	1.875	-1070.9	1.875	-1075.8	1.875	-1077.6	1.875	-1082.2	1.875	-1088.5	1.875	-1094	1.875	-1096.7
1.876	-1097.4									1.876	-1062.8	1.876	-1066.4	1.876	-1068.6	1.876	-1071.6	1.876	-1075.8	1.876	-1077.6	1.876	-1082.5	1.876	-1088.7	1.876	-1094.8	1.876	-1097.4
1.877	-1096.9									1.877	-1063.2	1.877	-1066.6	1.877	-1069.4	1.877	-1071.4	1.877	-1076	1.877	-1076.8	1.877	-1082	1.877	-1088.5	1.877	-1093.5	1.877	-1096.9
1.878	-1096.7									1.878	-1063.7	1.878	-1065.9	1.878	-1068.7	1.878	-1072.2	1.878	-1075.8	1.878	-1077.1	1.878	-1082.8	1.878	-1088.4	1.878	-1093.2	1.878	-1096.7
1.879	-1096.9									1.879	-1063.9	1.879	-1065.8	1.879	-1067.7	1.879	-1071.8	1.879	-1075.4	1.879	-1076.9	1.879	-1083.5	1.879	-1087.2	1.879	-1092.8	1.879	-1096.9
1.88	-1096.8									1.88	-1063.8	1.88	-1065.7	1.88	-1067.1	1.88	-1072.6	1.88	-1075	1.88	-1077.1	1.88	-1083.6	1.88	-1087.8	1.88	-1094	1.88	-1096.8
1.881	-1096.9									1.881	-1064.2	1.881	-1065.7	1.881	-1067.3	1.881	-1071.5	1.881	-1075.5	1.881	-1077.4	1.881	-1083.9	1.881	-1087.4	1.881	-1093.7	1.881	-1096.9
1.882	-1097.1									1.882	-1064.3	1.882	-1065.7	1.882	-1067.8	1.882	-1072	1.882	-1075.5	1.882	-1077.6	1.882	-1084.6	1.882	-1087.4	1.882	-1094.1	1.882	-1097.1
1.883	-1096.7									1.883	-1064.1	1.883	-1065.8	1.883	-1068.1	1.883	-1072.5	1.883	-1073.8	1.883	-1077.1	1.883	-1084.6	1.883	-1087.4	1.883	-1093.5	1.883	-1096.7
1.884	-1096.4									1.884	-1064.3	1.884	-1065.9	1.884	-1068.4	1.884	-1072.2	1.884	-1074.1	1.884	-1077.4	1.884	-1085.1	1.884	-1087.5	1.884	-1093.6	1.884	-1096.4
1.885	-1096.4									1.885	-1064.4	1.885	-1065.7	1.885	-1068.7	1.885	-1072.3	1.885	-1074.2	1.885	-1077.3	1.885	-1085	1.885	-1087.5	1.885	-1093	1.885	-1096.4
1.886	-1096.7									1.886	-1064.7	1.886	-1066.6	1.886	-1068.6	1.886	-1072.2	1.886	-1074.4	1.886	-1077.1	1.886	-1085.2	1.886	-1088.3	1.886	-1093	1.886	-1096.7
1.887	-1096.3									1.887	-1065.6	1.887	-1066.4	1.887	-1068.9	1.887	-1072.4	1.887	-1074.4	1.887	-1077.1	1.887	-1085.2	1.887	-1087.6	1.887	-1093.2	1.887	-1096.3
1.888	-1096.5									1.888	-1065.9	1.888	-1066.8	1.888	-1069	1.888	-1073	1.888	-1074.1	1.888	-1077.1	1.888	-1085	1.888	-1087.6	1.888	-1093.2	1.888	-1096.5
1.889	-1096.2									1.889	-1066	1.889	-1067	1.889	-1068.4	1.889	-1072.5	1.889	-1074.3	1.889	-1077.5	1.889	-1085.4	1.889	-1087.4	1.889	-1093.4	1.889	-1096.2
1.89	-1096.8									1.89	-1065.9	1.89	-1066.7	1.89	-1069	1.89	-1073	1.89	-1074.5	1.89	-1077.6	1.89	-1085.3	1.89	-1087.6	1.89	-1093.6	1.89	-1096.8
1.891	-1096.2									1.891	-1065.8	1.891	-1066.4	1.891	-1068.7	1.891	-1072.2	1.891	-1074.5	1.891	-1077.4	1.891	-1086.3	1.891	-1088.4	1.891	-1092.4	1.891	-1096.2
1.892	-1096.9									1.892	-1065.7	1.892	-1066.7	1.892	-1068.8	1.892	-1071.3	1.892	-1074.9	1.892	-1077.2	1.892	-1086.1	1.892	-1088.6	1.892	-1093	1.892	-1096.9
1.893	-1096.9									1.893	-1065.7	1.893	-1066.4	1.893	-1068.8	1.893	-1071.6	1.893	-1075.2	1.893	-1077.9	1.893	-1085.4	1.893	-1088.6	1.893	-1092.8	1.893	-1096.9
1.894	-1097.6									1.894	-1065.3	1.894	-1067	1.894	-1069.2	1.894	-1072.1	1.894	-1075	1.894	-1077.5	1.894	-1085.3	1.894	-1088.8	1.894	-1092.6	1.894	-1097.6
1.895	-1098.4									1.895	-1065.1	1.895	-1066.4	1.895	-1068.9	1.895	-1072	1.895	-1074.7	1.895	-1078.4	1.895	-1084.6	1.895	-1089	1.895	-1093	1.895	-1098.4
1.896	-1099.1									1.896	-1064.9	1.896	-1065.8	1.896	-1069.4	1.896	-1072	1.896	-1074.8	1.896	-1078	1.896	-1084.6	1.896	-1089.3	1.896	-1093	1.896	-1099.1
1.897	-1095.5									1.897	-1064.5	1.897	-1065.7	1.897	-1069.6	1.897	-1072.3	1.897	-1075.2	1.897	-1078.2	1.897	-1083.1	1.897	-1088.8	1.897	-1092.4	1.897	-1095.5
1.898	-1095.8									1.898	-1064.5	1.898	-1066	1.898	-1069.9	1.898	-1072.2	1.898	-1075.1	1.898	-1078.3	1.898	-1083.2	1.898	-1088.3	1.898	-1092.6	1.898	-1095.8
1.899	-1096.6									1.899	-1065	1.899	-1065.7	1.899	-1070	1.899	-1072.5	1.899	-1075.2	1.899	-1078	1.899	-1082.7	1.899	-1088.3	1.899	-1092.4	1.899	-1096.6
1.9	-1096.7									1.9	-1064.9	1.9	-1066.2	1.9	-1070.1	1.9	-1072.5	1.9	-1075.1	1.9	-1078.7	1.9	-1082.5	1.9	-1088.1	1.9	-1092.6	1.9	-1096.7
1.901	-1095.6									1.901	-1063.9	1.901	-1065.7	1.901	-1069.9	1.901	-1072.3	1.901	-1074.5	1.901	-1079.3	1.901	-1083.4	1.901	-1087.8	1.901	-1092.5	1.901	-1095.6
1.902	-1095.8									1.902	-1064.1	1.902	-1066.3	1.902	-1070.1	1.902	-1072.9	1.902	-1074.9	1.902	-1077.2	1.902	-1083.4	1.902	-1087.6	1.902	-1092.5	1.902	-1095.8
1.903	-1096									1.903	-1063.5	1.903	-1066.1	1.903	-1070	1.903	-1073.5	1.903	-1075	1.903	-1076.8	1.903	-1083.1	1.903	-1087.9	1.903	-1092.8	1.903	-1096
1.904	-1096.1									1.904	-1063.7	1.904	-1066.7	1.904	-1070.3	1.904	-1073.3	1.904	-1075.1	1.904	-1077.6	1.904	-1083.2	1.904	-1088.5	1.904	-1091.9	1.904	-1096.1
1.905	-1096.2									1.905	-1063.8	1.905	-1066.7	1.905	-1069.7	1.905	-1073.9	1.905	-1075	1.905	-1077.3	1.905	-1083.3	1.905	-1088.2	1.905	-1092.8	1.905	-1096.2
1.906	-1096.5									1.906	-1063.8	1.906	-1067	1.906	-1070	1.906	-1073.5	1.906	-1075.1	1.906	-1077.6	1.906	-1082.4	1.906	-1088	1.906	-1093	1.906	-1096.5
1.907	-1096.6									1.907	-1064.2	1.907	-1067.2	1.907	-1070	1.907	-1073.8	1.907	-1075.3	1.907	-1077.6	1.907	-1083	1.907	-1087.4	1.907	-1092.5	1.907	-1096.6
1.908	-1096.5									1.908	-1064.1	1.908	-1067	1.908	-1070.2	1.908	-1073.9	1.908	-1075	1.908	-1078.3	1.908	-1082.4	1.908	-1088.3	1.908	-1092.6	1.908	-1096.5
1.909	-1096.3									1.909	-1064.4	1.909	-1067.6	1.909	-1069.8	1.909	-1074.3	1.909	-1075.2	1.909	-1077.4	1.909	-1082.4	1.909	-1088.3	1.909	-1093.8	1.909	-1096.3
1.91	-1097.2									1.91	-1064.5	1.91	-1067.9	1.91	-1070.5	1.91	-1073	1.91	-1075.3	1.91	-1077.7	1.91	-1082.5	1.91	-1088.6	1.91	-1093.1	1.91	-1097.2
1.911	-1097.4									1.911	-1064.7	1.911	-1067.6	1.911	-1070.1	1.911	-1072.7	1.911	-1075.9	1.911	-1078.2	1.911	-1082.8	1.911	-1088.6	1.911	-1093.6	1.911	-1097.4
1.912	-1097.4									1.912	-1064.6	1.912	-1068	1.912	-1070.2	1.912	-1070.7	1.912	-1075.9	1.912	-1078.9	1.912	-1082.1	1.912	-1089	1.912	-1093.3	1.912	-1097.4
1.913	-1097.3									1.913	-1064.8	1.913	-1067.5	1.913	-1070.4	1.913	-1071.6	1.913	-1076.2	1.913	-1078.7	1.913	-1082.3	1.913	-1088.5	1.913	-1092.5	1.913	-1097.3
1.914	-1097.2									1.914	-1065.1	1.914	-1066.6	1.914	-1070.4	1.914	-1072.1	1.914	-1076.5	1.914	-1078.4	1.914	-1082	1.914	-1088.6	1.914	-1093.1	1.914	-1097.2
1.915	-1096.9									1.915	-1064.5	1.915	-1067	1.915	-1070	1.915	-1071.8	1.915	-1076.6	1.915	-1078.7	1.915	-1082.2	1.915	-1088.5	1.915	-1092.2	1.915	-1096.9
1.916	-1097									1.916	-1064.8	1.916	-1066.7	1.916	-1069.7	1.916	-1072.5	1.916	-1077	1.916	-1078.6	1.916	-1082	1.916	-1088.4	1.916	-1092.1	1.916	-1097
1.917	-1097.6									1.917	-1064.7	1.917	-1067.2	1.917	-1070.2	1.917	-1072.5	1.917	-1076.4	1.917	-1078.8	1.917	-1082.2	1.917	-1087.9	1.917	-1092.3	1.917	-1097.6
1.918	-1096.5									1.918	-1064.1	1.918	-1066.7	1.918	-1069.8	1.918	-1072.4	1.918	-1076.2	1.918	-1078.9	1.918	-1082	1.918	-1088.2	1.918	-1092.6	1.918	-1096.5
1.919	-1097									1.919	-1064.8	1.919	-1066.8	1.919	-1070.4	1.919	-1072.2	1.919	-1076.1	1.919	-1079.4	1.919	-1082	1.919	-1087.6	1.919	-1092.5	1.919	-1097
1.92	-1097.6									1.92	-1064.7	1.92	-1066.9	1.92	-1070.3	1.92	-1072.2	1.92	-1076.8	1.92	-1078.9	1.92	-1082.2	1.92	-1087.8	1.92	-1092.7	1.92	-1097.6
1.921	-1097.7									1.921	-1064.3	1.921	-1066.7	1.921	-1070.3	1.921	-1072.3	1.921	-1075.4	1.921	-1079.6	1.921	-1082.4	1.921	-1087.3	1.921	-1092.7	1.921	-1097.7
1.922	-1096.8									1.922	-1064.4	1.922	-1066.8	1.922	-1070.2	1.922	-1072.3	1.922	-1075.2	1.922	-1078.9	1.922	-1082.6	1.922	-1087.8	1.922	-1092.6	1.922	-1096.8
1.923	-1097.4									1.923	-1064	1.923	-1067	1.923	-1070.4	1.923	-1072.5	1.923	-1074.9	1.923	-1079.4	1.923	-1082.5	1.923	-1087.8	1.923	-1092.9	1.923	-1097.4
1.924	-1098.2									1.924	-1064	1.924	-1067.5	1.924	-1070.3	1.924	-1072.9	1.924	-1075.1	1.924	-1079	1.924	-1082.5	1.924	-1087.6	1.924	-1092.9	1.924	-1098.2
1.925	-1097.9									1.925	-1063.4	1.925	-1067	1.925	-1070.7	1.925	-1072.7	1.925	-1075.3	1.925	-1078.4	1.925	-1082.4	1.925	-1087.9	1.925	-1092.3	1.925	-1097.9
1.926	-1098.4									1.926	-1063.7	1.926	-1067.5	1.926	-1070.6	1.926	-1072.6	1.926	-1075.2	1.926	-1078.4	1.926	-1083.1	1.926	-1088.1	1.926	-1092.3	1.926	-1098.4
1.927	-1098.2									1.927	-1063.6	1.927	-1066.9	1.927	-1070.9	1.927	-1072.3	1.927	-1075.8	1.927	-1078.7	1.927	-1083.1	1.927	-1087.7	1.927	-1092.4	1.927	-1098.2
1.928	-1098.9									1.928	-1064.2	1.928	-1067	1.928	-1070.8	1.928	-1072.9	1.928	-1075.9	1.928	-1078.5	1.928	-1084	1.928	-1088.1	1.928	-1092.5	1.928	-1098.9
1.929	-1098.5									1.929	-1063.7	1.929	-1067.8	1.929	-1071	1.929	-1072.6	1.929	-1076.6	1.929	-1078.5	1.929	-1084.5	1.929	-1087.2	1.929	-1093	1.929	-1098.5
1.93	-1098.7									1.93	-1064.3	1.93	-1067.5	1.93	-1071	1.93	-1072.6	1.93	-1075.2	1.93	-1078.7	1.93	-1085.1	1.93	-1088.4	1.93	-1092.9	1.93	-1098.7
1.931	-1099									1.931	-1064.3	1.931	-1067.9	1.931	-1070.6	1.931	-1072.6	1.931	-1075.5	1.931	-1078.9	1.931	-1084.6	1.931	-1087.1	1.931	-1093.2	1.931	-1099
1.932	-1099.5									1.932	-1064.9	1.932	-1067.7	1.932	-1070.4	1.932	-1072.6	1.932	-1075.5	1.932	-1078.4	1.932	-1085.5	1.932	-1087.6	1.932	-1093.1	1.932	-1099.5
1.933	-1099.1									1.933	-1064.7	1.933	-1067.8	1.933	-1070.7	1.933	-1072.3	1.933	-1075.2	1.933	-1078.8	1.933	-1085.1	1.933	-1087.6	1.933	-1093.6	1.933	-1099.1
1.934	-1099.1									1.934	-1064.9	1.934	-1067.8	1.934	-1071	1.934	-1072.2	1.934	-1074.7	1.934	-1078.5	1.934	-1085.7	1.934	-1088	1.934	-1092.9	1.934	-1099.1
1.935	-1098.8									1.935	-1065	1.935	-1067.4	1.935	-1071.1	1.935	-1071.6	1.935	-1075.2	1.935	-1078.9	1.935	-1085.9	1.935	-1088.3	1.935	-1093.5	1.935	-1098.8
1.936	-1098.3									1.936	-1065.4	1.936	-1066.7	1.936	-1071.7	1.936	-1071.6	1.936	-1074.7	1.936	-1078.6	1.936	-1086	1.936	-1088.2	1.936	-1093.5	1.936	-1098.3
1.937	-1098.6									1.937	-1064.5	1.937	-1067.6	1.937	-1070.5	1.937	-1072.3	1.937	-1075.1	1.937	-1079.7	1.937	-1086.2	1.937	-1087.8	1.937	-1093.4	1.937	-1098.6
1.938	-1098.5									1.938	-1064.2	1.938	-1067.1	1.938	-1070.7	1.938	-1071.8	1.938	-1075.5	1.938	-1079.7	1.938	-1086.5	1.938	-1088.2	1.938	-1093	1.938	-1098.5
1.939	-1099.3									1.939	-1064.7	1.939	-1067.4	1.939	-1070.8	1.939	-1071.8	1.939	-1075.1	1.939	-1080	1.939	-1086.2	1.939	-1088.9	1.939	-1093.7	1.939	-1099.3
1.94	-1098.8									1.94	-1065.4	1.94	-1066.8	1.94	-1071.5	1.94	-1071.8	1.94	-1074.9	1.94	-1080.2	1.94	-1084	1.94	-1089.3	1.94	-1093.6	1.94	-1098.8
1.941	-1099.6									1.941	-1065.2	1.941	-1067.2	1.941	-1071	1.941	-1072.3	1.941	-1075.1	1.941	-1079.6	1.941	-1084.3	1.941	-1089.1	1.941	-1093.8	1.941	-1099.6
1.942	-1099.9									1.942	-1064.1	1.942	-1066.7	1.942	-1070.6	1.942	-1072.3	1.942	-1075.2	1.942	-1079.6	1.942	-1083.7	1.942	-1089.4	1.942	-1093.2	1.942	-1099.9
1.943	-1099.9									1.943	-1064.1	1.943	-1067.3	1.943	-1070.7	1.943	-1072.2	1.943	-1075.2	1.943	-1079.9	1.943	-1084.3	1.943	-1088.9	1.943	-1093.4	1.943	-1099.9
1.944	-1099.7									1.944	-1064.3	1.944	-1067	1.944	-1071.2	1.944	-1072.3	1.944	-1075.1	1.944	-1079.8	1.944	-1084.6	1.944	-1088.2	1.944	-1093.2	1.944	-1099.7
1.945	-1100.2									1.945	-1063.8	1.945	-1066.4	1.945	-1071	1.945	-1072	1.945	-1075.2	1.945	-1080.7	1.945	-1084.2	1.945	-1088.8	1.945	-1094.1	1.945	-1100.2
1.946	-1100									1.946	-1064.1	1.946	-1066.4	1.946	-1071.2	1.946	-1072.1	1.946	-1074.6	1.946	-1080.3	1.946	-1085.1	1.946	-1088.9	1.946	-1093.9	1.946	-1100
1.947	-1099.9									1.947	-1063.7	1.947	-1066.9	1.947	-1071.1	1.947	-1072	1.947	-1075.1	1.947	-1080.1	1.947	-1085.5	1.947	-1089.6	1.947	-1093.9	1.947	-1099.9
1.948	-1099.7									1.948	-1064	1.948	-1067.2	1.948	-1071	1.948	-1072.2	1.948	-1075	1.948	-1080.3	1.948	-1085.4	1.948	-1090.1	1.948	-1093.7	1.948	-1099.7
1.949	-1099.8									1.949	-1064	1.949	-1067.6	1.949	-1071.1	1.949	-1072.5	1.949	-1074.7	1.949	-1079.9	1.949	-1085.5	1.949	-1090.4	1.949	-1094.1	1.949	-1099.8
1.95	-1099.8									1.95	-1064.1	1.95	-1067.2	1.95	-1070.6	1.95	-1072.3	1.95	-1074.3	1.95	-1080.6	1.95	-1085.2	1.95	-1090.6	1.95	-1093.8	1.95	-1099.8
1.951	-1099.5									1.951	-1063.9	1.951	-1067.3	1.951	-1070.9	1.951	-1072.5	1.951	-1074.6	1.951	-1080.7	1.951	-1085	1.951	-1090.6	1.951	-1094.7	1.951	-1099.5
1.952	-1099.4									1.952	-1063.4	1.952	-1067	1.952	-1071.1	1.952	-1072.7	1.952	-1074.7	1.952	-1080.6	1.952	-1085.6	1.952	-1089.1	1.952	-1093.8	1.952	-1099.4
1.953	-1099.4									1.953	-1064.2	1.953	-1067.1	1.953	-1071.2	1.953	-1072.7	1.953	-1074.4	1.953	-1079.4	1.953	-1085.2	1.953	-1089.2	1.953	-1093.4	1.953	-1099.4
1.954	-1099.7									1.954	-1063.7	1.954	-1067	1.954	-1071.2	1.954	-1072.8	1.954	-1074.9	1.954	-1080.1	1.954	-1085.4	1.954	-1089.9	1.954	-1093.3	1.954	-1099.7
1.955	-1098.7									1.955	-1063.4	1.955	-1066.9	1.955	-1071.2	1.955	-1073.4	1.955	-1075.4	1.955	-1079.7	1.955	-1085.1	1.955	-1089.6	1.955	-1093.9	1.955	-1098.7
1.956	-1098.9									1.956	-1063.6	1.956	-1066.5	1.956	-1070.7	1.956	-1073	1.956	-1075.9	1.956	-1080.6	1.956	-1085.4	1.956	-1089.3	1.956	-1093.4	1.956	-1098.9
1.957	-1099									1.957	-1063.9	1.957	-1066.8	1.957	-1071.1	1.957	-1073.4	1.957	-1075.6	1.957	-1080.4	1.957	-1085.2	1.957	-1089.3	1.957	-1093.7	1.957	-1099
1.958	-1098.8									1.958	-1064	1.958	-1067	1.958	-1070.9	1.958	-1073.6	1.958	-1075.3	1.958	-1081	1.958	-1085	1.958	-1089.2	1.958	-1093.4	1.958	-1098.8
1.959	-1098.8									1.959	-1064.4	1.959	-1067.1	1.959	-1071.2	1.959	-1073.2	1.959	-1075.5	1.959	-1080.6	1.959	-1084.9	1.959	-1090.1	1.959	-1093.3	1.959	-1098.8
1.96	-1098.8									1.96	-1065	1.96	-1067	1.96	-1071.1	1.96	-1073.1	1.96	-1075.4	1.96	-1080.5	1.96	-1084.6	1.96	-1090.2	1.96	-1093.2	1.96	-1098.8
1.961	-1098									1.961	-1065	1.961	-1067.2	1.961	-1071.2	1.961	-1073.3	1.961	-1075.5	1.961	-1079.4	1.961	-1084.5	1.961	-1090.4	1.961	-1093.4	1.961	-1098
1.962	-1098.8									1.962	-1065.1	1.962	-1066.9	1.962	-1070.4	1.962	-1073.3	1.962	-1075.3	1.962	-1080.6	1.962	-1084.7	1.962	-1090.3	1.962	-1093.3	1.962	-1098.8
1.963	-1097.2									1.963	-1065.8	1.963	-1067.3	1.963	-1070.8	1.963	-1073.8	1.963	-1075.7	1.963	-1080	1.963	-1084.5	1.963	-1090.6	1.963	-1093.4	1.963	-1097.2
1.964	-1096.9									1.964	-1063.8	1.964	-1067.1	1.964	-1071	1.964	-1073.9	1.964	-1075.3	1.964	-1080.7	1.964	-1084.2	1.964	-1089.4	1.964	-1092.9	1.964	-1096.9
1.965	-1096.7									1.965	-1064	1.965	-1067.4	1.965	-1071.2	1.965	-1073.5	1.965	-1075.5	1.965	-1080.8	1.965	-1084.3	1.965	-1090	1.965	-1092.9	1.965	-1096.7
1.966	-1097.3									1.966	-1063.4	1.966	-1067.3	1.966	-1070.9	1.966	-1073.6	1.966	-1076.1	1.966	-1080.8	1.966	-1084.6	1.966	-1089.9	1.966	-1092.9	1.966	-1097.3
1.967	-1096.4									1.967	-1063.5	1.967	-1067.4	1.967	-1070.7	1.967	-1073.2	1.967	-1075.2	1.967	-1080.6	1.967	-1084.6	1.967	-1090.4	1.967	-1092.9	1.967	-1096.4
1.968	-1097									1.968	-1064.2	1.968	-1067.7	1.968	-1070.6	1.968	-1074.6	1.968	-1075.2	1.968	-1081	1.968	-1085	1.968	-1090	1.968	-1092.8	1.968	-1097
1.969	-1097.2									1.969	-1063.5	1.969	-1067.9	1.969	-1070.6	1.969	-1074.1	1.969	-1075.3	1.969	-1080.9	1.969	-1085.3	1.969	-1090.2	1.969	-1093.7	1.969	-1097.2
1.97	-1096.2									1.97	-1064.4	1.97	-1067.3	1.97	-1070.2	1.97	-1073.9	1.97	-1075.6	1.97	-1081	1.97	-1084.9	1.97	-1090.2	1.97	-1092.6	1.97	-1096.2
1.971	-1096.7									1.971	-1064.3	1.971	-1067.4	1.971	-1070.1	1.971	-1074.6	1.971	-1075.4	1.971	-1080.9	1.971	-1085.3	1.971	-1090.3	1.971	-1092.7	1.971	-1096.7
1.972	-1096.9									1.972	-1064.5	1.972	-1067.5	1.972	-1069.6	1.972	-1074.3	1.972	-1075.5	1.972	-1080.8	1.972	-1085.1	1.972	-1089.9	1.972	-1092.6	1.972	-1096.9
1.973	-1097.1									1.973	-1064.2	1.973	-1067.2	1.973	-1069	1.973	-1074.5	1.973	-1075.1	1.973	-1080.5	1.973	-1085.6	1.973	-1089.7	1.973	-1092.1	1.973	-1097.1
1.974	-1096.6									1.974	-1064.2	1.974	-1067.4	1.974	-1069	1.974	-1074	1.974	-1076	1.974	-1080.6	1.974	-1085.5	1.974	-1089.7	1.974	-1093.1	1.974	-1096.6
1.975	-1096.8									1.975	-1064.3	1.975	-1067.3	1.975	-1069.2	1.975	-1073.9	1.975	-1075.5	1.975	-1080.4	1.975	-1085.8	1.975	-1089.9	1.975	-1093.1	1.975	-1096.8
1.976	-1097.4									1.976	-1064.9	1.976	-1067.4	1.976	-1069.6	1.976	-1074.3	1.976	-1075.9	1.976	-1080.7	1.976	-1085.1	1.976	-1090.4	1.976	-1093.6	1.976	-1097.4
1.977	-1097.4									1.977	-1064.6	1.977	-1067.3	1.977	-1069.6	1.977	-1074.5	1.977	-1075.9	1.977	-1079.7	1.977	-1085.7	1.977	-1090.7	1.977	-1093.9	1.977	-1097.4
1.978	-1097.9									1.978	-1064.5	1.978	-1067.1	1.978	-1069.3	1.978	-1073.3	1.978	-1075.8	1.978	-1080.3	1.978	-1085.5	1.978	-1090.8	1.978	-1094.4	1.978	-1097.9
1.979	-1098.5									1.979	-1064.2	1.979	-1067	1.979	-1069.3	1.979	-1073.5	1.979	-1075.9	1.979	-1079.8	1.979	-1084.7	1.979	-1090.4	1.979	-1095.2	1.979	-1098.5
1.98	-1098.4									1.98	-1064.6	1.98	-1067.4	1.98	-1069.7	1.98	-1073.6	1.98	-1075.9	1.98	-1080.8	1.98	-1084.4	1.98	-1090.7	1.98	-1094.3	1.98	-1098.4
1.981	-1098.7									1.981	-1064.9	1.981	-1067.5	1.981	-1068.8	1.981	-1073.1	1.981	-1076.2	1.981	-1080.1	1.981	-1085	1.981	-1090.5	1.981	-1094.5	1.981	-1098.7
1.982	-1098.4									1.982	-1065.5	1.982	-1067.4	1.982	-1069	1.982	-1073.7	1.982	-1076.4	1.982	-1079.9	1.982	-1085	1.982	-1090.4	1.982	-1094.7	1.982	-1098.4
1.983	-1098.7									1.983	-1065.5	1.983	-1067.2	1.983	-1069.4	1.983	-1073.6	1.983	-1076.5	1.983	-1081	1.983	-1084.9	1.983	-1090.2	1.983	-1094.2	1.983	-1098.7
1.984	-1098.2									1.984	-1065.2	1.984	-1067.3	1.984	-1069.4	1.984	-1073.3	1.984	-1076.4	1.984	-1080.9	1.984	-1084.5	1.984	-1091	1.984	-1093.7	1.984	-1098.2
1.985	-1098.3									1.985	-1065.2	1.985	-1067.3	1.985	-1069.8	1.985	-1073.9	1.985	-1076	1.985	-1081.3	1.985	-1085.1	1.985	-1090.7	1.985	-1093.9	1.985	-1098.3
1.986	-1098.4									1.986	-1065.3	1.986	-1067.6	1.986	-1069.5	1.986	-1073.8	1.986	-1076.6	1.986	-1081.1	1.986	-1085	1.986	-1090.3	1.986	-1093.1	1.986	-1098.4
1.987	-1098.3									1.987	-1065.5	1.987	-1067.5	1.987	-1069.6	1.987	-1074.1	1.987	-1076.2	1.987	-1079.7	1.987	-1085.9	1.987	-1090.6	1.987	-1093.5	1.987	-1098.3
1.988	-1098.3									1.988	-1065.6	1.988	-1067.8	1.988	-1069.5	1.988	-1073	1.988	-1076.1	1.988	-1079.9	1.988	-1085.2	1.988	-1091.1	1.988	-1093	1.988	-1098.3
1.989	-1097.9									1.989	-1065.7	1.989	-1067.9	1.989	-1070	1.989	-1073.5	1.989	-1076	1.989	-1080.5	1.989	-1085.2	1.989	-1091	1.989	-1093.5	1.989	-1097.9
1.99	-1098.2									1.99	-1065.8	1.99	-1067.8	1.99	-1070.4	1.99	-1073.8	1.99	-1075.9	1.99	-1080.5	1.99	-1084.5	1.99	-1091.3	1.99	-1093	1.99	-1098.2
1.991	-1098.3									1.991	-1065.8	1.991	-1067.3	1.991	-1070.6	1.991	-1073.5	1.991	-1075.5	1.991	-1081.5	1.991	-1084.9	1.991	-1091	1.991	-1093.1	1.991	-1098.3
1.992	-1097.9									1.992	-1066	1.992	-1067.8	1.992	-1070	1.992	-1073.8	1.992	-1075.6	1.992	-1081	1.992	-1084.2	1.992	-1090.9	1.992	-1093.6	1.992	-1097.9
1.993	-1097.9									1.993	-1066	1.993	-1067.4	1.993	-1070.5	1.993	-1074	1.993	-1075.7	1.993	-1081.1	1.993	-1084.5	1.993	-1090.7	1.993	-1093.1	1.993	-1097.9
1.994	-1098.3									1.994	-1066.3	1.994	-1067.5	1.994	-1070.5	1.994	-1074.4	1.994	-1075.8	1.994	-1080.9	1.994	-1084.6	1.994	-1090.9	1.994	-1093.2	1.994	-1098.3
1.995	-1098.1									1.995	-1066.7	1.995	-1067.9	1.995	-1070.9	1.995	-1074.5	1.995	-1076.1	1.995	-1080.7	1.995	-1084.9	1.995	-1090.4	1.995	-1092.8	1.995	-1098.1
1.996	-1097.8									1.996	-1066.8	1.996	-1068.2	1.996	-1070.8	1.996	-1074.8	1.996	-1076.1	1.996	-1080.3	1.996	-1084.5	1.996	-1090.4	1.996	-1093	1.996	-1097.8
1.997	-1098.2									1.997	-1066.7	1.997	-1067.6	1.997	-1071	1.997	-1075.1	1.997	-1075.9	1.997	-1079.3	1.997	-1084.3	1.997	-1089.8	1.997	-1092.8	1.997	-1098.2
[truncated: 203 more rows]

## Sheet: G49286
Sun, Z., et al., 2021, Formation of low-gradient bedrock chutes by dry rockfall on planetary surfaces: Geology, https://doi.org/10.1130/G49286.1
