# Supplementary material
Source: publisher figshare collection journal article supplement (https://gsapubs.figshare.com/articles/dataset/_/16746229)
Supplement: Supplementary file 1 [file 1]

**Data Repository for**  
**Formation of low-gradient bedrock chutes by dry rockfall on**  
**planetary surfaces**

Zhongheng Sun<sup>1,2</sup>, Thomas P. Ulizio<sup>1</sup>, Jade N. Fischer<sup>1</sup>, Janette N. Levin<sup>1</sup>, Alexander R. Beer<sup>1</sup>, James L. Dickson<sup>1</sup>, Michael P. Lamb<sup>1\*</sup>

<sup>1</sup> Division of Geological and Planetary Sciences, California Institute of Technology, Pasadena, California 91125, USA

<sup>2</sup> Key Laboratory of Tectonics and Petroleum Resources (China University of Geosciences), Ministry of Education, Wuhan 430074, China

<sup>3</sup> Department of Geosciences, University of Tübingen, D-72076 Tübingen, Germany

\*[mpl@gps.caltech.edu](mailto:mpl@gps.caltech.edu)

**This PDF file includes:**

Data Repository Figures

Figure S1 to S8

Caption for Video S1 to S3

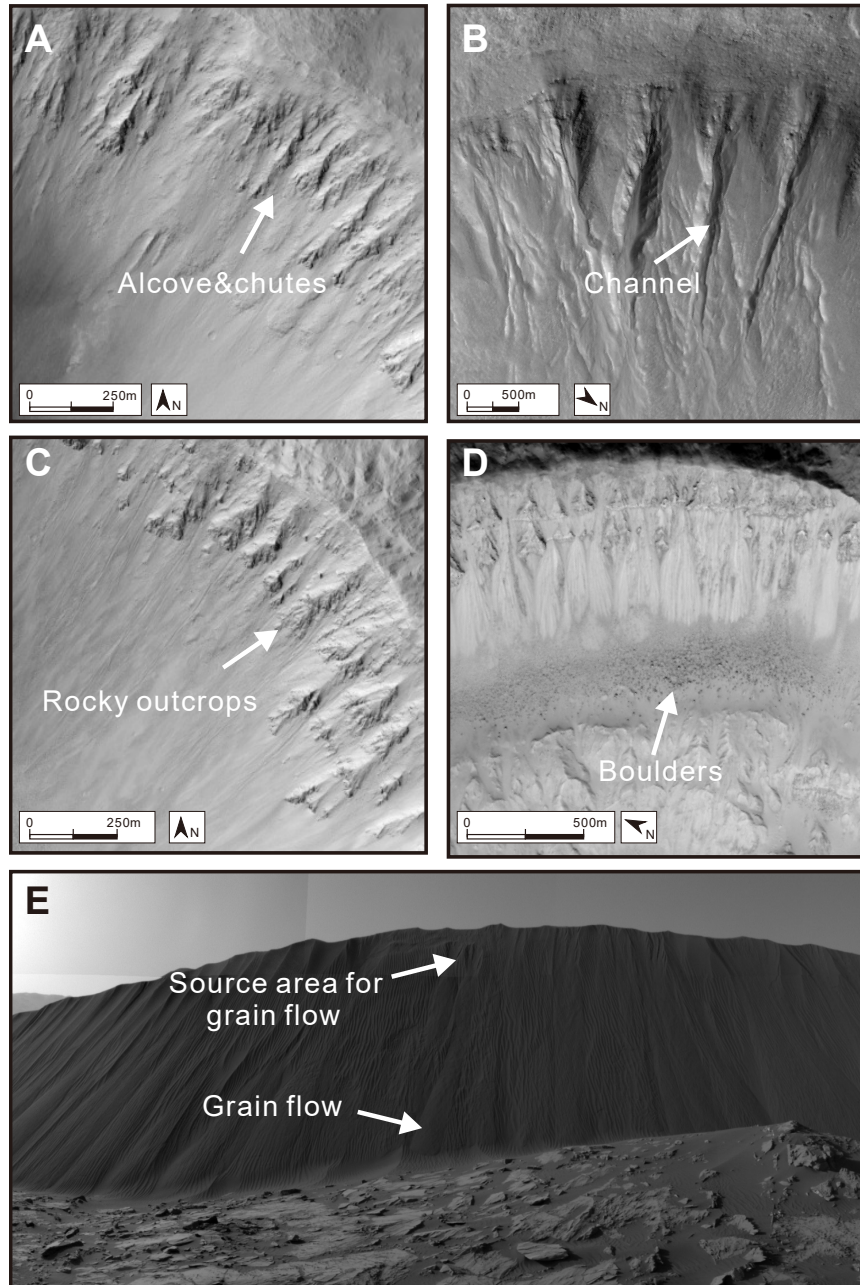

**Figure S1. Martian landforms.** (A) HiRISE image ESP\_019080\_1865 showing bedrock chutes and alcoves. (B) HiRISE image ESP\_022841\_1300 showing gully channels that are potentially in ice-cemented mantling material. (C) HiRISE image ESP\_035813\_1870 showing rocky outcrops on a crater wall. (D) HiRISE image ESP\_011972\_1665 showing large boulders below chutes. (E) Grain flow lobes on the 4-m-high slip face of Namib Dune by MSL Curiosity's Navigation Camera. Image credits: NASA/JPL-Caltech/University of Arizona.

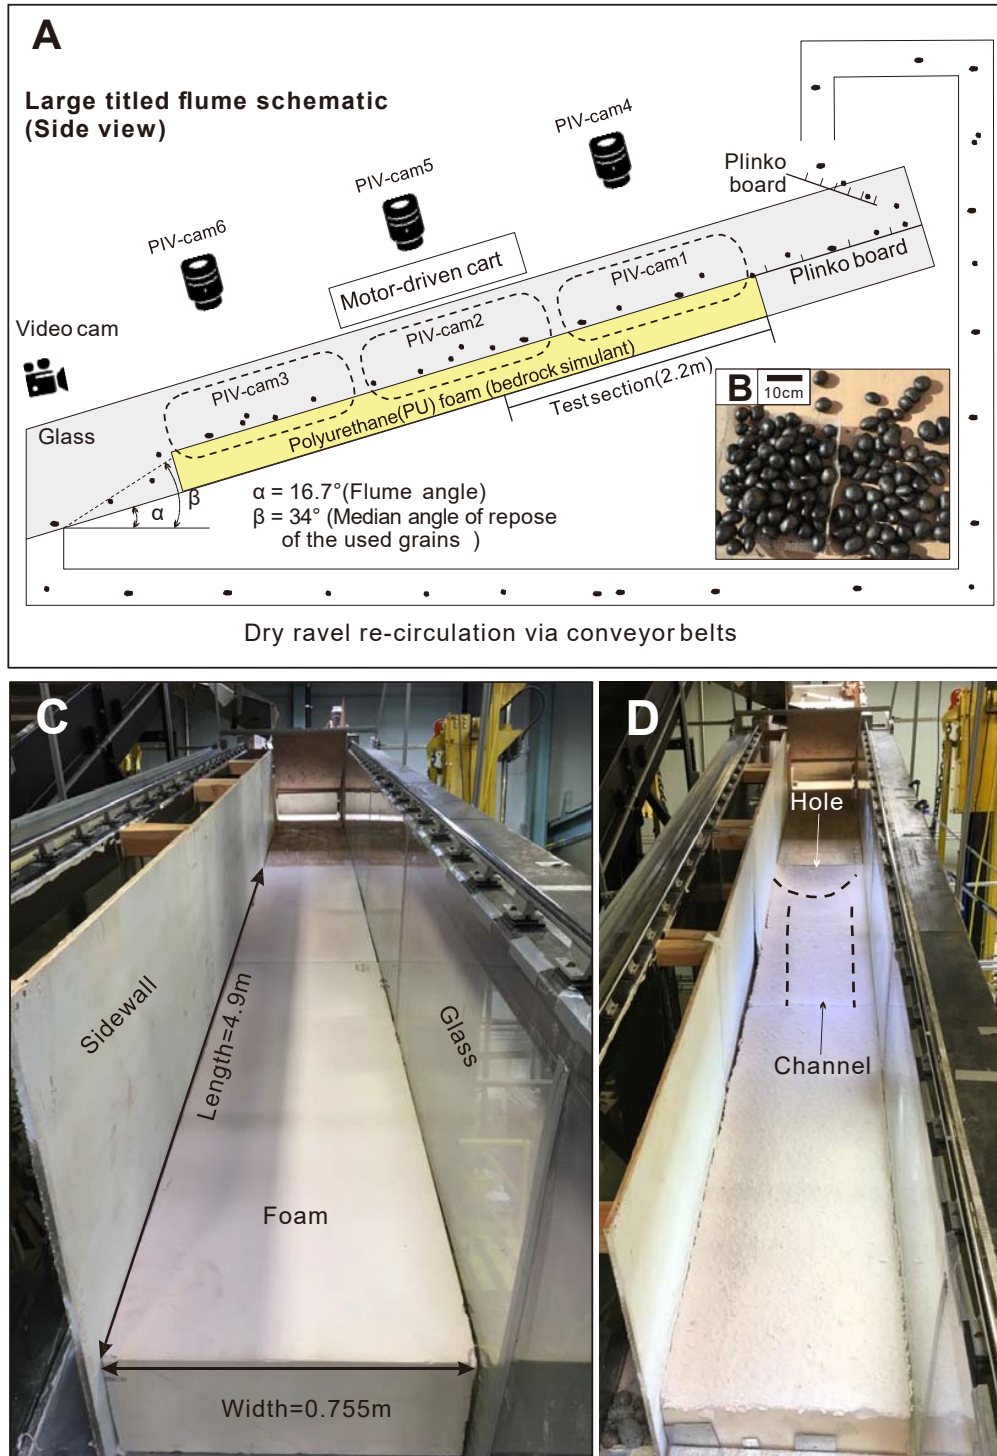

**Figure S2. Experimental setup.** (A) Schematic of the experimental facility. (B) Natural grains used in the experiment that were painted black to visualize. (C) View looking upslope into the flume at  $T^* = 0$ . (D) View into the flume after completion of the experiment ( $T^* = 66,400$ ).

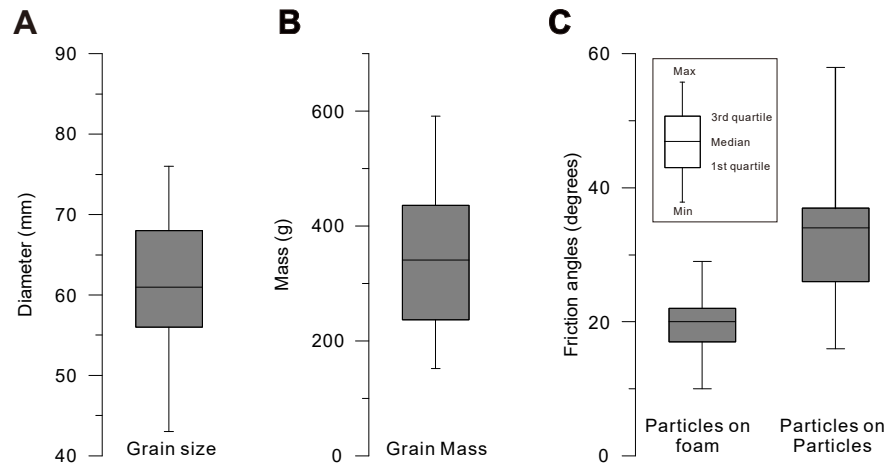

**Figure S3. Grain properties.** (A) Distribution of intermediate particle diameters (Data S1). (B) Distribution of particle mass (Data S1). (C) Friction angles of particles on the foam bed and on a bed of fixed particles of the same size and shape (Data S2).

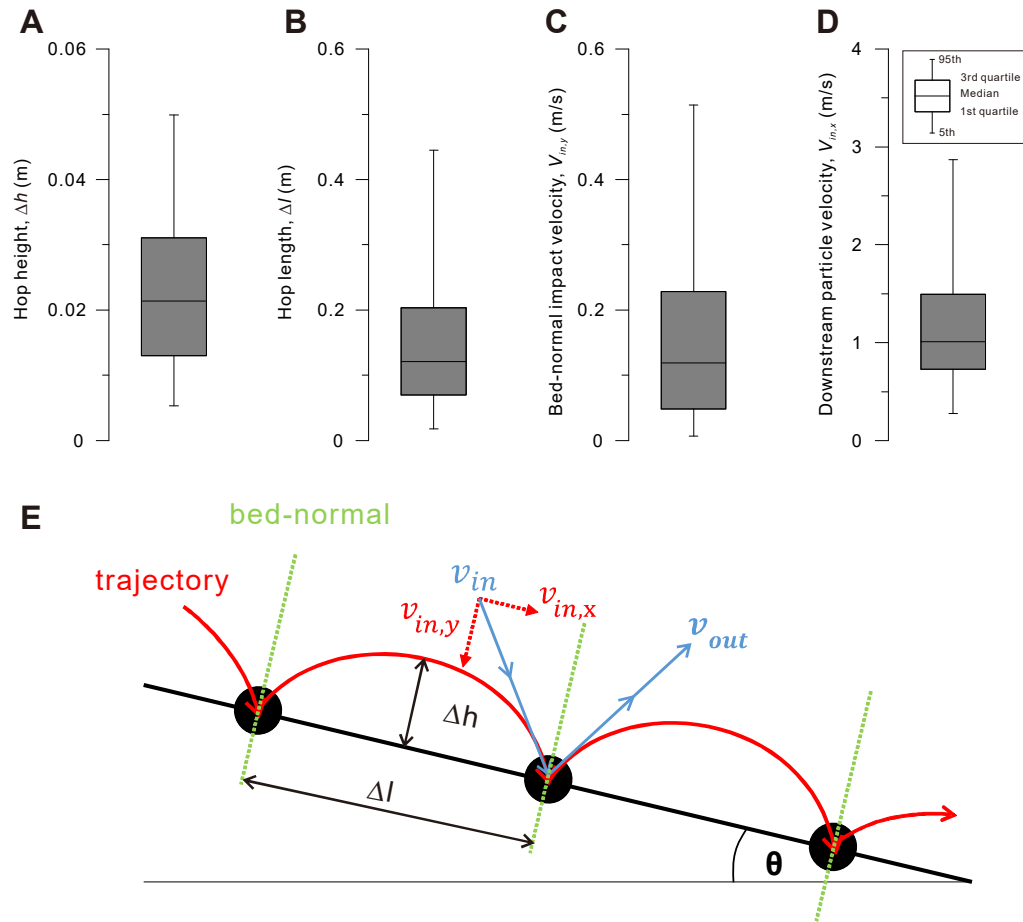

**Figure S4. Grain kinetics** (Data S3). **(A)** Hop heights ( $\Delta h$ ), **(B)** hop lengths ( $\Delta l$ ), **(C)** bed-normal impact velocities ( $v_{in,y}$ ), and **(D)** downstream particle velocities ( $v_{in,x}$ ). The numbers represent the 202 of grains trajectories measured from time  $T^*=7700 - 66,400$ . **(E)** Schematic of a particle hopping on a tilted bed.

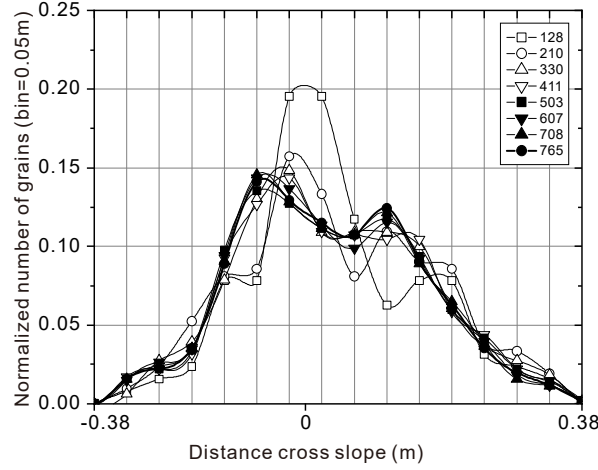

**Figure S5. Cross-slope grain distribution.** Subsampling of cross-slope grain distributions with different number of grains counted, measured at cross-section CS1 (see Fig. 3A) at  $T^*=66,400$ , showing that the distributions were consistent when more than 500 grains were counted (Data S5).

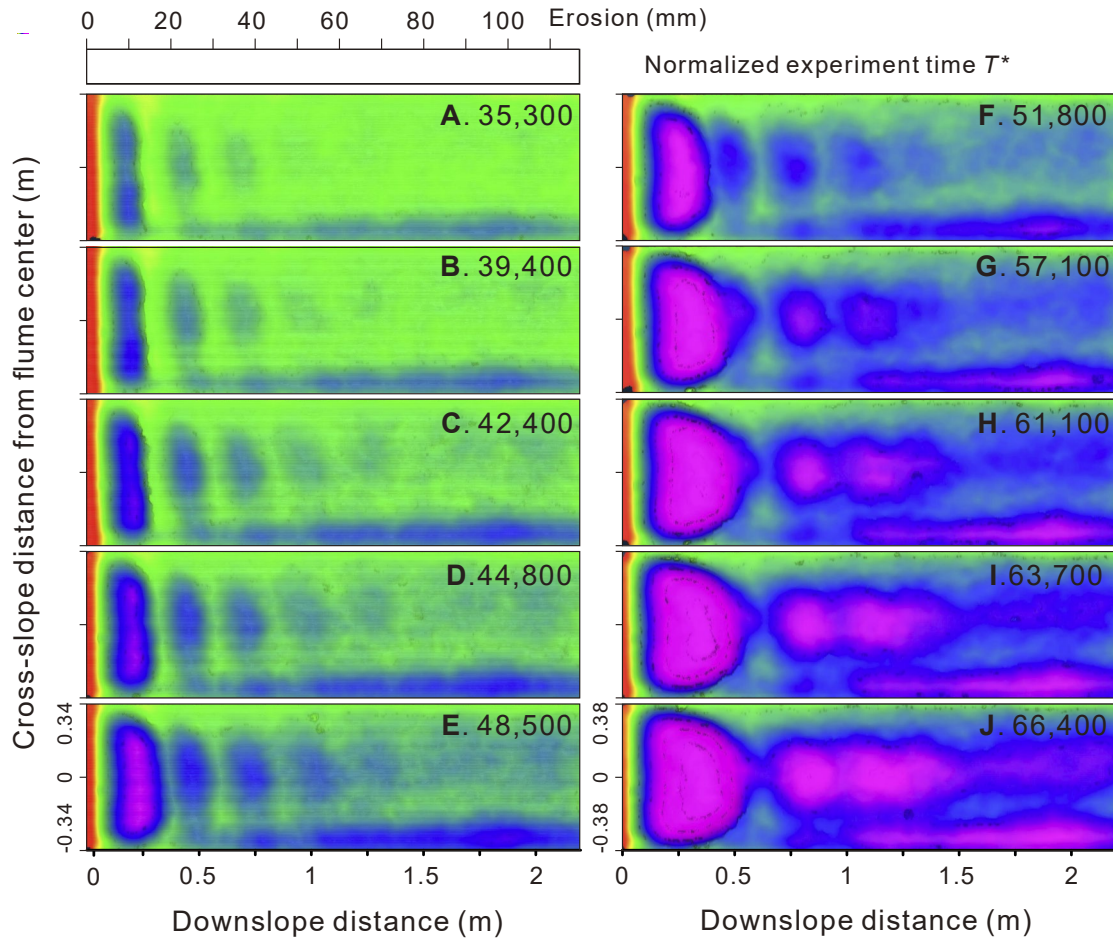

**Figure S6. Bedrock topography evolution.** Erosion was calculated by subtracting the topography at the noted dimensionless experimental time,  $T^*$ , from the initial planar surface elevations.



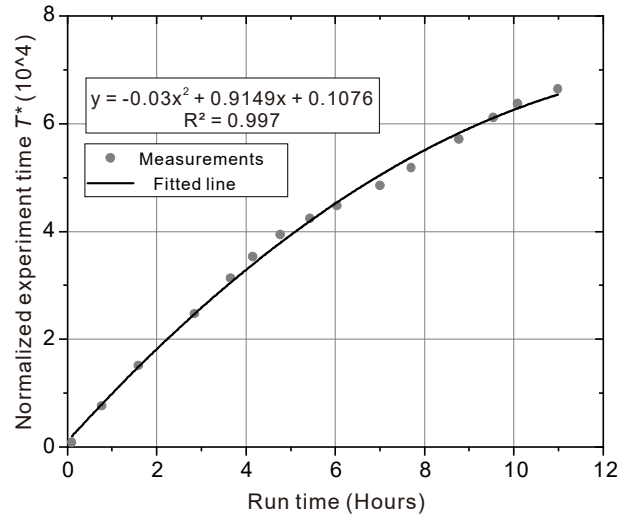

**Figure S7.** Normalized experiment time  $T^*$  as a function of run time (Data S6).

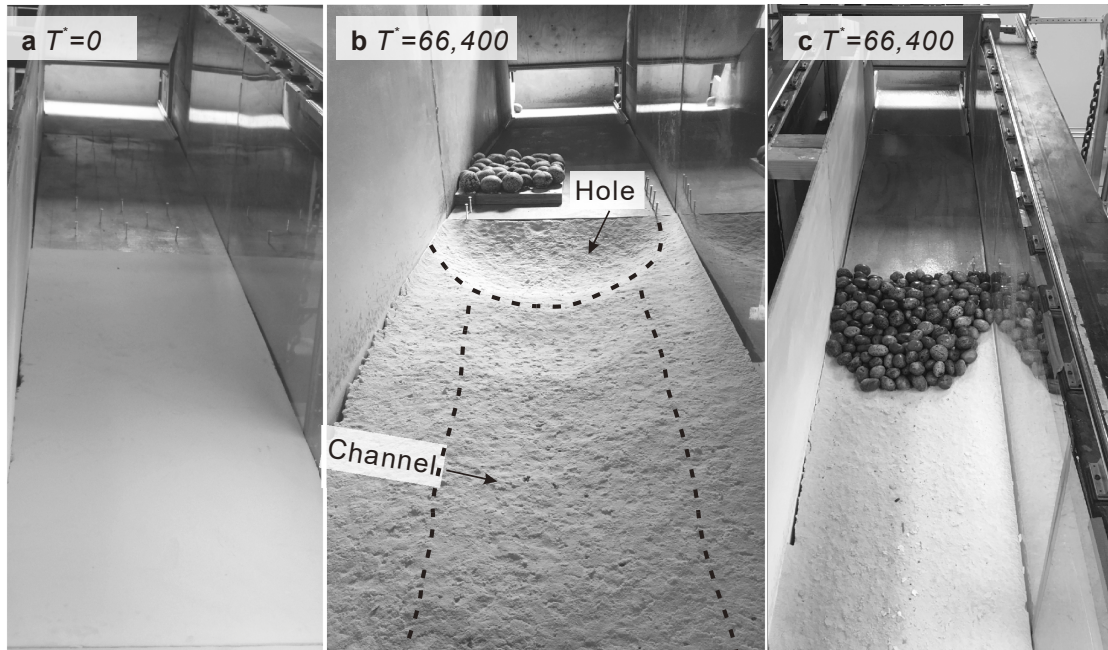

**Figure S8. Bedrock comparison before and after the experiment.** (A) Initial flume bed with planar foam and pegboard upslope. (B) Bedrock topography showing formed alcove, trough and gully channel after completion of the experiment ( $T^*=66,400$ ). (C) Same time as panel B but with the upslope hole filled with the static layer of cobbles at the experiment end ( $T^*=66,400$ ). Note the changed peg board upslope, where most pegs were removed at  $T^* = 7700$ .

**Videos S1-S3.** Oblique overhead video of the experimental test section during active rock fall at  $T^*=16,900$  (Video S1),  $T^*=36,570$  (Video S2) and  $T^*= 55,500$  (Video S3). Note that due to the light color of the foam and lighting used for particle tracking, the topography on the foam is not clearly visualized.
